# Supplementary material for: RNA-sequencing-based comparative analysis of human hepatic progenitor cells and their niche from alcoholic steatohepatitis livers
Source: PubMed Central journal article supplement (PMC5775409; doi:10.1038/cddis.2017.543), 2017-11-02
Supplement: cddis2017543x2.pdf [file cddis2017543x2.pdf]

## Principle Component analysis

|                 | PC1          | PC2          | PC3          |
|-----------------|--------------|--------------|--------------|
| <b>liver_p1</b> | -125,6076301 | 3,443413208  | 0,884815243  |
| <b>liver_p2</b> | -128,3564567 | 1,534485632  | -0,268848989 |
| <b>liver_p3</b> | -115,8280064 | 6,276526299  | 5,518648572  |
| <b>liver_p4</b> | -130,9739206 | -10,54668262 | -12,50825106 |
| <b>Epcam_p1</b> | 34,95257891  | -2,617781875 | 7,211184626  |
| <b>Epcam_p2</b> | 40,6613363   | 8,705044457  | 58,76799032  |
| <b>Epcam_p3</b> | 46,25387683  | 44,6405357   | -45,88064953 |
| <b>Epcam_p4</b> | 36,93036445  | -63,42242618 | -30,15384477 |
| <b>SP_p1</b>    | 47,96029919  | -62,04487749 | -24,09018779 |
| <b>SP_p2</b>    | 37,01474379  | 35,99864984  | 18,97748175  |
| <b>SP_p3</b>    | 38,32935749  | -16,09421389 | 56,38716828  |
| <b>SP_p4</b>    | 45,34418995  | 53,39580773  | -28,61420428 |
| <b>TROP2_p1</b> | 36,52765888  | 14,84233855  | 17,66737048  |
| <b>TROP2_p2</b> | 41,97465279  | 18,98963881  | 43,34048781  |
| <b>TROP2_p3</b> | 47,84599541  | 50,87159993  | -51,91266317 |
| <b>TROP2_p4</b> | 46,97095983  | -83,9720581  | -15,3264975  |

Supplementary data of Fig. 3b: specific genes in all groups of the clustering

## Gene clustering

| Genes only upregulated in: | <u>SP</u> | <u>EpCAM</u> | <u>Trop-2</u> |
|----------------------------|-----------|--------------|---------------|
|                            | ABCA7     | AADAACL4     | A2MP1         |
|                            | ABCC8     | ABO          | ABCA13        |
|                            | ACAP1     | ACCS         | ABCA17P       |
|                            | ADAMTSL1  | AGER         | ACAN          |
|                            | AGAP2     | ALS2CR11     | ACCN2         |
|                            | AIM1      | AMZ1         | ACCN4         |
|                            | AKNA      | ANKRD22      | ACPP          |
|                            | ALAS2     | ANO7         | ADGB          |
|                            | ALG1L2    | ATP1A4       | ANGPTL5       |
|                            | ANKRD19P  | AURKB        | ANO2          |
|                            | ANKRD28   | B4GALT2      | ARHGAP11B     |
|                            | ANLN      | BEGAIN       | B3GALT5       |
|                            | APBA2     | BOLL         | C11orf16      |
|                            | APOBEC3D  | BPY2B        | C19orf45      |
|                            | APOBEC3G  | BTBD18       | C1orf98       |
|                            | APOLD1    | C11orf36     | C2orf50       |
|                            | AQP8      | C11orf42     | C6orf164      |
|                            | ARHGAP9   | C11orf45     | CA13          |
|                            | ARHGEF3   | C14orf176    | CATSPER3      |
|                            | ATP1A3    | C1QL3        | CBLN2         |
|                            | ATP1B3    | C1QTNF3      | CCDC160       |
|                            | ATP2A3    | C1orf129     | CCL7          |
|                            | B4GALNT1  | C1orf227     | CD164L2       |
|                            | BATF      | C22orf26     | CD9           |
|                            | BCL2A1    | C2orf63      | CHTOP         |
|                            | BIRC2     | C2orf71      | CLDN16        |
|                            | BLM       | C4orf37      | CLEC18C       |
|                            | BMX       | C6orf163     | CMTM5         |
|                            | BTBD11    | C8orf31      | CRB1          |
|                            | BVES-AS1  | CACNB4       | CSMD2         |
|                            | C10orf2   | CALB2        | CXorf65       |
|                            | C12orf68  | CALHM3       | CYP27C1       |
|                            | C16orf54  | CASC2        | CYP2W1        |
|                            | C17orf72  | CCDC150      | DLG2          |
|                            | C1orf177  | CCDC158      | EIF3CL        |
|                            | C1orf96   | CCDC62       | FAM177B       |

|               |              |              |
|---------------|--------------|--------------|
| C20orf166-AS1 | CD1A         | FAM22F       |
| C20orf195     | CDKL4        | FAM48B1      |
| C20orf201     | CELA3A       | FAM70A       |
| C21orf91-OT1  | CERS1        | FAM83A       |
| C3orf62       | CHRFAM7A     | FDCSP        |
| C4orf44       | CHST6        | FHAD1        |
| C5orf52       | CKLF-CMTM1   | FLJ12334     |
| C6orf195      | COL4A5       | FNDC8        |
| C9orf163      | CRIPAK       | FZD10        |
| C9orf169      | CST4         | GALNT9       |
| C9orf50       | CXorf57      | GCOM1        |
| CA1           | CYCSP52      | GEM          |
| CA10          | CYP4F22      | GJA9         |
| CARD11        | DAZ4         | GPR77        |
| CASP8         | DKFZP434A062 | HAP1         |
| CCDC116       | DKFZp451B082 | HORMAD1      |
| CCDC88B       | DNAJC27-AS1  | HOXD9        |
| CCDC88C       | DPY19L2P3    | HTR3C        |
| CCIN          | DUSP9        | IMPG1        |
| CCL5          | EBLN2        | ISL2         |
| CCL8          | EGFEM1P      | KIFC1        |
| CCND2         | EIF2C1       | KRT85        |
| CCR6          | FAM13A-AS1   | LAMP3        |
| CD160         | FAM156A      | LEFTY2       |
| CD200         | FAM186B      | LGALS7B      |
| CD244         | FAM19A1      | LGALS9B      |
| CD247         | FAM209B      | LINC00470    |
| CD28          | FAM24B       | LINC00538    |
| CD69          | FAM47E-STBD1 | LOC100130357 |
| CD7           | FAM90A10     | LOC100132287 |
| CD96          | FAM90A13     | LOC100134015 |
| CDHR1         | FAM90A14     | LOC100144595 |
| CENPF         | FAM90A5      | LOC100289211 |
| CHST8         | FAM90A8      | LOC100506035 |
| CITED2        | FAM90A9      | LOC100506655 |
| CLCA3P        | FAM98B       | LOC100507240 |
| CLIC3         | FANK1        | LOC283392    |
| CLNK          | FER1L6-AS1   | LOC286190    |
| CNR2          | FHIT         | LOC286297    |
| CORO7         | FLJ35946     | LOC339807    |
| CPLX1         | FLJ40852     | LOC407835    |
| CPNE7         | GAGE10       | LOC439990    |
| CRCT1         | GNAZ         | LOC441461    |

|          |              |             |
|----------|--------------|-------------|
| CRTAM    | GPR20        | LOC641746   |
| CST7     | GRIK4        | LOC643339   |
| CTSW     | H2AFY2       | LOC643802   |
| CXCR3    | HCG23        | LOC647323   |
| CXCR4    | HJURP        | LOC728723   |
| CXCR6    | HRASLS       | LRRC4       |
| CYP26C1  | HRH4         | LYPD2       |
| CYTIP    | HSD17B7P2    | MAGEB10     |
| DBF4     | KIF24        | MAP6D1      |
| DERL3    | KRT19P2      | MED12L      |
| DGKA     | LINC00235    | MEF2B       |
| DKK2     | LINC00535    | MESTIT1     |
| DLL1     | LOC100128682 | MIR671      |
| DNAH17   | LOC100129345 | MS4A8B      |
| DOC2B    | LOC100129858 | MYBL2       |
| DOCK10   | LOC100130417 | MYBPC2      |
| DOK2     | LOC100132724 | MYH7        |
| DRD1     | LOC100190940 | MYO1A       |
| DTHD1    | LOC100288842 | NEBL        |
| DUSP26   | LOC100505839 | NKX2-3      |
| E2F1     | LOC100506025 | NOS2        |
| ELK2AP   | LOC100506469 | NPPB        |
| EME2     | LOC100507086 | OCM         |
| ENSA     | LOC100507091 | OLIG1       |
| EOMES    | LOC100507373 | OR10A6      |
| ERP27    | LOC100507424 | OR2A42      |
| FAM107A  | LOC100507589 | PCA3        |
| FAM117A  | LOC151174    | PCDHB9      |
| FAM124B  | LOC282980    | PEAK1       |
| FAM179A  | LOC284260    | PLXNA1      |
| FAM212B  | LOC285889    | POM121L1P   |
| FAM83D   | LOC388906    | PPFIA2      |
| FAM90A1  | LOC390660    | PPP1R27     |
| FAS-AS1  | LOC400958    | PRAMEF4     |
| FASLG    | LOC401431    | PRSS1       |
| FBLN2    | LOC440288    | PRSS42      |
| FBN3     | LOC643201    | PRTG        |
| FBXO5    | LOC649330    | PTPRN       |
| FCRL3    | LOC728373    | RFPL1-AS1   |
| FCRL6    | LOC728405    | RHCG        |
| FEV      | LRFN5        | RNF186      |
| FHL5     | LRRC37A3     | ROPN1       |
| FLJ27354 | LRRN4CL      | RPS10-NUDT3 |

|           |             |                  |
|-----------|-------------|------------------|
| FNBP1     | MAGEA10     | SELP             |
| FNDC9     | MAP9        | SERINC4          |
| FRMD1     | METTTL21CP1 | SERPINB8         |
| FSBP      | MGC45922    | SFMBT1           |
| FSD1      | MIR22       | SLC12A3          |
| FXYD7     | MIR2276     | SLC12A5          |
| FYN       | MS4A14      | SLC47A2          |
| GAGE12I   | MTRNR2L3    | SLED1            |
| GALR2     | MUC16       | SNORA31          |
| GATA2     | MYBPC1      | SNORA5C          |
| GATA3     | MYO15A      | SOX2             |
| GBP5      | NAA40       | TAF7L            |
| GDF1      | NCCRP1      | TAS2R14          |
| GDF6      | NEFH        | TCEAL6           |
| GEMIN8P4  | NEUROG3     | TCEB3CL          |
| GFI1      | NKX6-1      | TEKT1            |
| GGN       | NLRP12      | TM4SF19-TCTEX1D2 |
| GHRLOS    | NME9        | TMEM145          |
| GK3P      | NTN3        | TP73             |
| GLCCI1    | OOEP        | TRPC6            |
| GNG4      | OR52A5      | TTY6             |
| GNLY      | OSM         | UCP3             |
| GPCPD1    | PANX3       | VN1R2            |
| GPR111    | PAPL        | XAGE2B           |
| GPR114    | PCBP4       | ZBTB20-AS1       |
| GPR132    | PCDHB1      | ZNF213           |
| GPR174    | PCDHGA9     | ZNF284           |
| GPR18     | PDE1C       | ZNF419           |
| GPR19     | PKD2L1      | ZNF732           |
| GPR55     | PLD5        |                  |
| GPR68     | PLSCR5      |                  |
| GPR97     | POMZP3      |                  |
| GRASP     | POU5F1P4    |                  |
| GRIK1-AS1 | PPIEL       |                  |
| GRM7      | PRR4        |                  |
| GSG2      | PRRT3       |                  |
| GTF2A1L   | PRRX2       |                  |
| GUCY2D    | RABL2B      |                  |
| GYPA      | REG1A       |                  |
| GZMM      | RNF113B     |                  |
| HAUS3     | SCARNA9     |                  |
| HBM       | SEC1        |                  |
| HCG26     | SEC14L4     |                  |

|            |                |
|------------|----------------|
| HELB       | SHOX2          |
| HEMGN      | SIAH3          |
| HERC1      | SNORA8         |
| HES6       | SNORD89        |
| HIST1H2BE  | SNX31          |
| HIST1H3H   | SOX15          |
| HIST2H2AA4 | SPATC1         |
| HMGB2      | SPDYE8P        |
| HMHA1      | SPEF1          |
| HOTAIRM1   | ST8SIA5        |
| HOXA1      | SYN3           |
| HOXA10     | TAS1R3         |
| HOXA2      | TDGF1P3        |
| HOXA3      | TDH            |
| HOXA7      | TEX12          |
| HOXC4      | THUMPD2        |
| HOXD-AS1   | TIAF1          |
| HSF5       | TM4SF19        |
| IDI2       | TMEM180        |
| IDS        | TMEM52         |
| IGLL5      | TNN            |
| IKZF3      | TRIM6-TRIM34   |
| IL12RB1    | TRIM64C        |
| IL12RB2    | TSPAN10        |
| IL18RAP    | TSSK3          |
| IL2        | TTL            |
| IL23R      | USP17L6P       |
| IL2RA      | UTS2D          |
| IL2RB      | VWA3B          |
| IL2RG      | XCR1           |
| IL4I1      | ZFR2           |
| IL7R       | ZNF221         |
| INHA       | ZNF280B        |
| INPP4A     | ZNF605         |
| ITGAD      | ZNF664-FAM101A |
| ITGAL      | ZNF676         |
| ITK        | ZNF774         |
| ITPKB      | ZNF883         |
| IVNS1ABP   | ZRANB2-AS2     |
| IZUMO4     |                |
| JAKMIP3    |                |
| JAM2       |                |
| JSRP1      |                |

KCNA3  
KCNH7  
KCNQ5  
KIAA0415  
KIAA0922  
KIAA1024  
KIAA1257  
KIAA1751  
KIF20B  
KIF21B  
KIR2DL1  
KIR2DL3  
KIR2DL4  
KIR3DL1  
KIR3DL2  
KIT  
KLF1  
KLHL6  
KLK13  
KLRB1  
KLRC1  
KLRC2  
KLRC3  
KLRC4  
KLRC4-KLRK1  
KLRD1  
KLRF1  
KLRK1  
KRT27  
LAT2  
LAX1  
LCN6  
LDHAL6A  
LFNG  
LINC00204A  
LINC00260  
LINC00426  
LINC00548  
LINGO3  
LIPE  
LIPJ  
LOC100129924  
LOC100130231

LOC100270804  
LOC100287314  
LOC100287814  
LOC100289092  
LOC100506779  
LOC149773  
LOC154761  
LOC283553  
LOC283710  
LOC283888  
LOC285740  
LOC339666  
LOC340508  
LOC344967  
LOC375295  
LOC389458  
LOC439949  
LOC641518  
LOC642826  
LOC646862  
LOC646999  
LOC653061  
LOC653075  
LOC653653  
LPAR3  
LPXN  
LRMP  
LRRC16B  
LRRC3B  
LRRC71  
LRRC73  
LRRN3  
LTA  
LURAP1  
LY9  
M1  
MADD  
MAP1LC3B  
MAPKAPK2  
MATK  
MCTP1  
MCTP2  
MEIG1



MIR137HG  
MIR181A2HG  
MIR4687  
MIR4707  
MIR564  
MIR650  
MLC1  
MYBL1  
MYO1G  
NBEAP1  
NCR1  
NCR3  
NKG7  
NLRC3  
NLRP1  
NLRP6  
NOG  
NT5C1B-RDH14  
NTRK1  
NXPH4  
OR2W3  
OSR2  
OVCH1  
P2RX5  
PAGE5  
PARP15  
PBXIP1  
PCDH9  
PDCD1  
PDE4B  
PENK  
PHF12  
PIK3CD  
PIK3CG  
PIM2  
PITPNC1  
PLCB2  
POTEH  
PPP1R16B  
PRDM1  
PREX1  
PREX2  
PRF1

PRKCH  
PRSS57  
PTGDR  
PTGER2  
PTK2B  
PTPN22  
PTPN7  
PTPRC  
PTPRE  
PTTG1  
PWRN1  
PYHIN1  
RAD51AP2  
RAET1K  
RASGRP1  
RASL10A  
RASSF5  
RGS2  
RHAG  
RIBC2  
RLTPR  
RNF168  
ROPN1L  
RORA  
RPL13AP6  
RTKN2  
RUNX1-IT1  
RUNX2  
RUNX3  
S1PR5  
SAMSN1  
SAPCD2  
SATB1  
SCARNA10  
SCARNA22  
SCG3  
SEMA3G  
SEMA4D  
SEMA6B  
sep/01  
SERF1A  
SERHL  
SERPINE3

SFMBT2  
SH2D1A  
SH2D1B  
SH2D2A  
SHCBP1  
SIDT1  
SIGLECP3  
SKIL  
SLA  
SLA2  
SLAMF1  
SLAMF7  
SLC16A3  
SLC17A7  
SLC17A8  
SLC1A4  
SLC38A5  
SLC4A1  
SLC4A10  
SLFN5  
SMC4  
SMCHD1  
SNAI3  
SNHG1  
SNORA14A  
SNORA32  
SNORA41  
SNORA53  
SNORA5A  
SNORA61  
SNORD83B  
SNORD90  
SOST  
SPINK2  
SPN  
SPOCK2  
STAM  
STAP1  
STARD9  
STAT4  
STK10  
STK17B  
SUV39H1

SYNGAP1  
SYT4  
SYT5  
SYTL1  
SYTL3  
TARP  
TBX21  
TCF7  
TFIP11  
TGFB1  
TGIF2-C20ORF24  
THAP2  
TIGIT  
TMC8  
TMEM31  
TMIGD2  
TNFRSF11B  
TNFRSF25  
TNFRSF4  
TNFSF14  
TOX2  
TRAIP  
TRIM39  
TRIM7  
TSC22D3  
TSPAN32  
TTC24  
TTY10  
TXK  
VAMP1  
VAX2  
VCP1P1  
VIPR2  
WDR49  
WNT1  
XCL1  
XCL2  
YPEL5  
ZAP70  
ZBED2  
ZBP1  
ZBTB12  
ZBTB45

ZDHHC18

ZFP57

ZIK1

ZNF331

ZNF416

ZNF548

ZNF750

ZNF786

ZNF80

ZNF831

ZNF876P

ZNF890P

## Genes for Venn Diagram

| EpCAM          | TROP-2        | SP            | EpCAM AND TROP-2 | EpCAM AND SP  | SP AND TROP-2 | EpCAM AND SP AND TROP-2 |
|----------------|---------------|---------------|------------------|---------------|---------------|-------------------------|
| ACTN4          | PELI2         | AACS          | C9orf152         | ZNF646        | MITF          | C5orf42                 |
| AHDC1          | SCAF8         | TFIP11        | FARP1            | KBTBD8        | BTN2A1        | CTD-2636A23.2           |
| ATP13A1        | UBB           | AP000295.9    | C10orf90         | RP11-174G6.5  | USP47         | ABCA3                   |
| HSPD1P5        | CYP4F23P      | ERCC5         | RALYL            | FGFR1         | AATK          | VEZF1P1                 |
| COL4A5         | CEACAM6       | ZNF785        | TACC2            | MED13L        | AC018633.4    | CEP250                  |
| SLC4A8         | RPL4P6        | RP11-439L18.2 | GDF15            | C10orf12      | UTRN          | SAMD4A                  |
| NUDT17         | SPA17P1       | CRTAM         | LYG1             | HS3ST1        | RELT          | BTG2                    |
| RP11-408H1.3   | KIAA1009      | RNVU1-14      | SH3BP4           | RP5-1025A1.2  | CAPN10-AS1    | ITGA5                   |
| CXADR          | C15orf41      | ZNF131        | ARRDC2           | PLEKHG7       | CTD-2020K17.1 | MUM1L1                  |
| C11orf93       | LHFPL2        | CCDC88B       | EPN2             | AL357673.1    | KPNA2         | EDN1                    |
| PGBD5          | HES1          | AC007285.6    | AK7              | TJAP1         | GTPBP1        | HSPB1                   |
| CCDC57         | CLDN16        | CYTH1         | NINL             | TMEM156       | PRDM2         | INPP5E                  |
| A2ML1          | GDPD5         | SEMA4D        | CAPS             | LA16c-380H5.5 | FAM63B        | PFKP                    |
| CEP170         | NEIL1         | RP11-360L9.8  | LINC00693        | RP11-351J23.1 | HMGA1P2       | PBX4                    |
| RIBC1          | VWA5A         | HIST1H4E      | TEAD1            | BARX2         | RNPS1P1       | AEN                     |
| PLEKHG4        | SERPINB9      | RP11-417L14.1 | HOOK3            | POLG          | RP11-48B3.3   | CLK4                    |
| FOXA2          | KNTC1         | NR4A2         | EIF4G3           | POU6F1        | RP5-1085F17.3 | CXCL3                   |
| LCOR           | HCG21         | ZFYVE1        | CRHR1-IT1        | SPRY2         | PPP2R3B       | GALNT3                  |
| FRMD5          | PRDM16        | MTMR1         | SEL1L3           | ANKLE2        | ULK4          | CHD8                    |
| KIAA0100       | USP3-AS1      | LAX1          | WHSC1            | GPR132        | SLC6A6        | RBM15                   |
| SORT1          | FAM110C       | RPS6KA5       | RNF223           | RP4-761J14.8  | RP5-940J5.6   | AHSA2                   |
| RP11-680E19.1  | RPL31P47      | RP11-493K19.3 | SPIRE2           | HNRNPA0       | ATAD3B        | TMC4                    |
| SH2B2          | CAPN1         | MAPKAPK2      | ARHGAP39         | ACAP3         | ULBP3         | FRAS1                   |
| SBNO2          | GRIK2         | ATG2B         | GATA6            | SPAG9         | EIF4A3        | DCAF5                   |
| RSPH4A         | RP11-73B2.6   | ELOVL5        | SYT13            | USPY9         | FAM189B       | MMP7                    |
| RICTOR         | DOHH          | PTPN22        | TRIM2            | MIR17HG       | CENPJ         | EP300                   |
| C19orf55       | RP11-4K3__A.5 | ZNF66         | GPN2             | DAGLB         | RP11-93B14.5  | HIC2                    |
| ANXA8L2        | IGFL4         | ZNF623        | TRAPPC9          | DGKQ          | NFRKB         | KIAA0895L               |
| STX19          | GALNT18       | AC006129.2    | LINC00605        | YJEFN3        | FANCA         | CHORDC1                 |
| GLYATL1P4      | CEP85         | CDC14A        | MEIS2            | GNGT1         | TUBA1A        | DDX5                    |
| PBX1           | ANXA2P2       | BAZ1B         | MCU              | NPHP3         | HSPA2         | FBNP1L                  |
| KRT8P41        | RTN4RL1       | LMNB2         | MYO15B           | KRT86         | PIGG          | ZNF446                  |
| PTPRH          | CTD-2666L21.1 | CD160         | ALCAM            | CCR7          | ENO2          | ZSCAN9                  |
| RGSL1          | GOLGA2B       | FOXK2         | HPCA             | AGPAT6        | CLK3          | TRIM33                  |
| UNC5CL         | OPA3          | TAF5          | THADA            | ASH1L-AS1     | TRIM56        | PPP1R13B                |
| FAM229A        | ARHGEF16      | ANLN          | PDZD3            | RP4-717I23.3  | ARHGAP12      | ERV3-1                  |
| ASXL2          | MICALL1       | DLX2          | RP11-755F10.3    | EIF5B         | ZNF767        | CCDC28B                 |
| RP11-1023L17.1 | ZMIZ1-AS1     | GPR55         | MMP15            | IL17RD        | TEX10         | RAB3IP                  |
| CYP3A5         | ARHGAP42      | RP11-536C5.7  | DNAH11           | CCDC117       | SLC5A3        | MET                     |
| S100A3         | ZDHHC11B      | TNFRSF9       | DNAH12           | UNC119B       | SPATA2        | THRAP3                  |
| SLC35F1        | RP11-244H3.1  | MIB2          | HLA-J            | UBN1          | SNURF         | TOB2                    |
| RN7SKP69       | TMEM241       | AP000253.1    | PAQR8            | SNHG15        | MEGF6         | TET3                    |
| FHDC1          | CXorf23       | TIAL1         | STMND1           | CTD-3137H5.1  | CTD-2555K7.4  | BBC3                    |
| AC114730.7     | MTRNR2L8      | MSH6          | POF1B            | MAML1         | CASC7         | SFTA2                   |
| UPK3B          | LRP5L         | AP4B1-AS1     | GLIS2            | CHML          | DHX9P1        | IGSF3                   |
| LRRC56         | EPHA7         | RNF4          | ATF7             | CTD-2006C1.2  | ALOXE3        | LRRN1                   |
| FHIT           | MARVELD3      | HDAC7         | LRRC48           | RP11-169K16.9 | AC017099.3    | EVC                     |
| RP11-19P22.8   | RP11-864J10.4 | MFSD11        | FUT4             | RPL32P3       | TEP1          | HERC2P2                 |
| TNNT2          | LINC00887     | CHMP1B        | DHX16            | WDR74         | AP001062.7    | RP11-215G15.5           |
| C6orf52        | MED25         | TMEM120B      | INPP5J           | MCM7          | SF3A1         | ARL6IP1                 |
| KIAA0753       | SDR16C5       | FZD9          | NEBL             | OSBP1L7       | RASGEF1B      | CHD1                    |
| LINC00174      | JRK           | CHFR          | GPATCH2          | ACKR6         | ZNF317        | TMEM184A                |
| GK5            | RP11-582J16.5 | VIM-AS1       | CBFA2T2          | TRIM11        | RP4-530I15.9  | BZRAP1                  |
| RP4-655J12.4   | OLR1          | ZBTB11        | GSTP1            | S100A2        | DDX3Y         | SPPL2B                  |
| TTC28-AS1      | TLR5          | CNOT6LP1      | NAALADL2         | RHOT2         | C2CD4D        | ARL4A                   |

|               |               |               |               |               |                |              |
|---------------|---------------|---------------|---------------|---------------|----------------|--------------|
| ACLY          | RP11-710F7.2  | CDC42EP3      | ARHGFE38      | CTB-89H12.4   | SYNCRIP        | ITGA3        |
| NPIPP1        | RP11-383C5.7  | FSIP1         | LPIN3         | CDK5RAP3      | NRGN           | HERC2        |
| PCED1A        | CEP164        | RP4-800J21.3  | RBPMS         | KIAA1731      | SLC6A8         | SLC12A4      |
| KRT18P12      | RP11-18H7.1   | RP1-68D18.4   | RP11-37B2.1   | LRRC8B        | C16orf72       | SLK          |
| RP11-58E21.3  | KIAA0368      | CDK17         | NMNAT2        | GLIPR1L2      | RSBN1          | LUZP1        |
| PP13439       | LUZP2         | SUZ12P        | SORBS2        | ZNF594        | RBM5           | POU3F1       |
| ERC2          | SLC7A11       | RP11-30K9.6   | RAB38         | RP11-386G11.5 | BAHD1          | NASP         |
| AC017076.5    | MAN2C1        | RASSF5        | CAPN6         | PRPF38AP2     | HEY1           | KRT18P16     |
| ASB1          | AC002429.5    | ZBTB18        | RP11-417F21.1 | ZNF252P-AS1   | U73166.2       | CDK20        |
| C22orf23      | MAVS          | ARIH1         | CDSN          | USP12         | NPIP4          | COL9A2       |
| C19orf44      | PCYT1B        | IL6R          | PPM1H         | CTD-3126B10.1 | ABHD17B        | ANXA3        |
| RSPH3         | B4GALT4       | HIST1H2BJ     | RP11-23P13.6  | CTC-518B2.12  | SNHG1          | PPP1R15B     |
| ZDHH8P1       | PDK4          | AKNA          | RALGPS1       | RP11-214O1.2  | MICAL1         | TENM4        |
| MARK2P8       | MMP1          | MIS18BP1      | VWA2          | SLCO5A1       | NFKB1          | VGLL3        |
| TRMT11        | CTC-529P8.1   | EPHA4         | SYTL4         | DMWD          | CAPN15         | DCP1A        |
| BEND5         | SSBP2         | MAFA          | PACSIN3       | AFTPH         | CTB-118N6.2    | HSPA1L       |
| MMP12         | PIFO          | RP11-572M11.4 | MUC5B         | RAD54L2       | C11orf84       | C15orf52     |
| LRRC36        | AJAP1         | LINC00943     | NOXA1         | KLF13         | UBAP2          | EGOT         |
| GUCA2A        | TRIP11        | NOP58         | C1orf198      | NBPF14        | CEP128         | BCLAF1       |
| FBXO15        | SYP           | PHF1          | WDR91         | RSF1          | MCM3AP-AS1     | FOXJ1        |
| GAPDHP68      | MMP11         | ZNF432        | TRIM45        | GCN1L1        | LBH            | TRA2B        |
| C14orf164     | CTD-2517M14.5 | LONRF2        | ANKRD26       | SPTSSB        | CENPT          | ABR          |
| TRIM24        | C9orf116      | RP1-59D14.3   | PDGFD         | MMP10         | PNP            | STK17A       |
| MIPEP         | LYPD6B        | DOM3Z         | BEX2          | ESR2          | SRSF12         | NCOR2        |
| IFT74         | CCDC162P      | RP5-1073O3.7  | RPS20P22      | ZKSCAN2       | ZNF554         | C2CD3        |
| RP11-484L7.1  | ARHGAP32      | C11orf68      | CSPP1         | SIK1          | FBXL12         | RIPK4        |
| CNTROB        | IP6K2         | HCFC1         | ZMYM5         | ARID1A        | SETD2          | DUSP4        |
| CTD-2005D20.1 | CCDC74B       | IL27RA        | RP11-175P13.3 | MGC20647      | GPR3           | HSP90AA4P    |
| RP11-128A6.3  | PCDHA5        | GFI1          | CSMD3         | PVRL1         | RGS16          | RP11-285F7.2 |
| DOCK1         | RNF31         | SCN11A        | DLGAP1        | MACF1         | RP11-258C19.5  | WHSC1L1      |
| ZNF676        | RP11-92C4.3   | CDH24         | LRBA          | DDX47         | 7SK            | CORO2A       |
| LINC00704     | PDLIM1        | FAM126B       | NTN4          | SPATA17       | EZH2           | FBXL14       |
| LRRC63        | AC025335.1    | E4F1          | TMPRSS4       | KLF16         | ACRC           | FBXO11       |
| DTX2          | EGFR          | DDX24         | BARD1         | RP11-203J24.8 | FOXC1          | DAPK3        |
| FLJ14082      | RP11-64B16.4  | TTC21B        | ICA1L         | HIST1H2AE     | TMEM217        | NRARP        |
| MTND5P25      | LRRC49        | IL23R         | HCG4P3        | VAMP1         | ZNF609         | SRPD1        |
| C9orf129      | CPSF6         | NRF1          | AGER          | AC004893.11   | TMCC2          | F2RL1        |
| AC004941.5    | C1QTNF6       | UBQLN2        | MAP4K3        | USP49         | LRRFIP1P1      | B3GNT7       |
| BPIFB1        | ZNRF3         | YWHAZ         | IL20RA        | FAM105B       | RP11-1336O20.2 | KLHL36       |
| hsa-mir-8072  | ZNF211        | RP1-111C20.4  | RP11-678G14.3 | SOS2          | SCNN1D         | DNM1         |
| TSIX          | NISCH         | KLRC1         | STK3          | GPATCH2L      | EMP1           | GCC2         |
| LINC00320     | C14orf79      | TAGAP         | C11orf49      | SPICE1        | PROSER1        | OTUD4        |
| PCDHB14       | DBNDD1        | IL1RL2        | VEZT          | CATSPERG      | FAM222B        | LLGL2        |
| ZDHH7         | PRDM10        | IDS           | SLC17A4       | MIR4453       | FAM110A        | RFX3         |
| RP13-225O21.2 | DUSP27        | CDHR1         | TPPP3         | PAN2          | UBR5           | HSP90AB2P    |
| SRRM1P2       | MKL2          | ZCCHC12       | STRN3         | RNF144A       | CBLB           | OTUD3        |
| Z83851.1      | PIWIL2        | PRPF39        | EPHB3         | VTRNA2-1      | MORC3          | FBXL19-AS1   |
| HSD17B3       | DDX43         | PSMD6-AS2     | ZKSCAN1       | MSX2          | ZRANB1         | BCL2         |
| RP11-696L21.2 | TNFRSF14      | TBX21         | LRIG1         | IFIT2         | C5orf49        | SRSF11       |
| POLL          | HDAC11        | MSNP1         | RNF43         | KSR1          | DGKB           | NFKB2        |
| PRKD2         | MAP3K4        | RP11-78A19.3  | GAL3ST1       | ZXDA          | NPIPA1         | ARL13B       |
| AKAP6         | RBPMS-AS1     | CCDC6         | RAB25         | FZD7          | SPTBN5         | TNFRSF10A    |
| TTC39A        | CDK2          | TRGC1         | FGFR4         | SF3A2         | OBSCN          | IFT140       |
| TRAPPC11      | RP11-294O2.2  | ZNF324        | MIR4435-1HG   | RAD52         | PNRC1          | KIAA1324     |
| HIST1H4D      | HTR1D         | TTC13         | CCDC14        | HELZ2         | CREBZF         | MAFK         |
| PDX1          | BFSP1         | YWHAH         | GYLTL1B       | H1FX-AS1      | PPP1R12C       | SON          |
| PRICKLE4      | ZNF532        | RP11-146F11.1 | PPP4R1        | NT5DC3        | SCEL           | FAM76B       |
| MYT1L         | NEURL4        | C17orf66      | KCNQ1         | C1orf52       | CCNT2          | MLF1         |
| AF011889.5    | RP11-61113.3  | RP11-46H11.12 | MMP24         | ODF2L         | H2AFX          | TRIM29       |
| QRICH2        | CLSPN         | RP5-1129J21.3 | CTTNBP2       | RND3          | CCDC130        | DUSP5        |

|               |               |               |               |               |              |               |
|---------------|---------------|---------------|---------------|---------------|--------------|---------------|
| KIAA1377      | LRRIQ1        | AC003075.4    | TP53I3        | ZNF653        | PRR14        | C12orf75      |
| SFI1          | ACOXL         | ZNF384        | RP11-553L6.5  | PRPF38B       | CEP95        | RP4-647C14.3  |
| TRPV4         | ZMYM2         | DSTYK         | ARHGAP8       | CCDC30        | AC005154.6   | PXDN          |
| PLEKHG5       | DNAH3         | KLHL28        | RERE          | HNRNPH3       | SUV420H2     | CDS1          |
| NCOR1         | TET1          | UBALD1        | SLC22A5       | ZNF292        | DYRK1B       | PPP1R9A       |
| CRIPAK        | CD47          | IRF7          | MYO1E         | MED23         | UBE2SP2      | TOMM34        |
| RP11-46B11.5  | RP11-311D14.1 | MAP1LC3B      | CAPN8         | SF1           | AC004510.2   | FKRP          |
| CALN1         | CAV2          | KIT           | ANXA2         | TMEM67        | RBM12        | FUS           |
| LRP2          | AC073052.1    | TMIGD2        | RP11-345P4.9  | EML2          | KRT8P30      | TOX3          |
| SHB           | ACTBL2        | TARSL2        | INPPL1        | NCAPH         | STX1A        | RNF39         |
| RP3-400N23.6  | RP11-519G16.5 | HYPK          | PDZK1IP1      | FOXP4         | FOXO4        | TSPYL4        |
| EXTL3         | LONRF1        | RP11-944L7.4  | AP1S3         | LETM2         | DIP2B        | USP42         |
| LIG1          | SEC63P2       | LINC00863     | SOGA1         | CNNM1         | NBPF10       | RGS4          |
| RP11-482E14.1 | RP11-512F24.1 | YWHAZP2       | OBSL1         | DENND2C       | HES6         | WDR19         |
| KANSL3        | TTL5          | HOXA5         | LINC00340     | RP11-138A9.1  | TBPL1        | NIPBL         |
| HDGFRP2       | RP11-423O2.5  | IL21R         | SLC12A7       | BCORL1        | TDG          | POGZ          |
| PJA1          | EIF3IP1       | CCNK          | FOX2          | SSH1          | IFNG         | RP11-737O24.3 |
| ARSD          | TFF1          | DNMT3A        | HNRNPD        | LATS1         | CNTRL        | EFHC1         |
| ZNF160        | GJB4          | BTBD9         | EFNA5         | MED1          | GTF2IRD2     | ZZEF1         |
| PLXNB2        | AP001258.4    | NCKAP5L       | ZDHHC1        | DDX6          | ZNF841       | RP11-66N24.3  |
| TTC22         | AMER1         | SLC7A6OS      | ATP2C2        | CAV1          | HK2          | BAMBI         |
| STPG2         | AGR2          | IL4I1         | SLC44A3       | ZDHHC23       | ASB6         | IRF3          |
| STXBP4        | RP4-773N10.4  | TRIM35        | HDAC4         | ANKRD29       | EFNB2        | PRRC2B        |
| CATSPERB      | CCDC13        | CCL4          | CTNNA1        | TMEM131       | NLGN1        | RHBDF1        |
| VTRNA1-1      | TMPRSS11A     | SMCHD1        | STK36         | RP11-496N12.9 | RN7SL473P    | C3orf52       |
| IL4R          | RP4-773A18.4  | TOX           | SH3TC2        | H1FX          | TEC          | TTLL4         |
| RP3-393E18.2  | TBC1D19       | RP4-742C19.12 | KRTCAP3       | RP11-83A24.1  | SNHG10       | MYO5C         |
| RGS12         | RP11-440L14.1 | AC002055.4    | WDFY3         | WRN           | KCNC4        | LIF           |
| EPS8L2        | TVP23C        | EDA2R         | PYGB          | WTAP          | ACIN1        | BACE2         |
| RAPGEF5       | MPZL2         | FAM107B       | SH3YL1        | SPSB3         | YLPM1        | OXTR          |
| MORF4L2-AS1   | AC073218.2    | PDE4D         | AK8           | CTD-2547E10.2 | RP11-459E5.1 | RP11-762H8.4  |
| SULF1         | MAST2         | ITK           | PTPRF         | HIST4H4       | CREBRF       | INO80D        |
| ILDR2         | NBEAL1        | ZNF551        | IZUMO1        | BTBD7         | SMG1P1       | KDM2A         |
| SNORA76       | GLIS3-AS1     | GS1-72M22.1   | DZIP1         | SNORD104      | C10orf111    | H3F3B         |
| DAGLA         | STX18-AS1     | HOTAIRM1      | TIAM2         | GATA6-AS1     | MAPK15       | KDM6A         |
| LAMP2         | AL020996.1    | PHF12         | FAM150A       | CTB-31O20.2   | RPGR         | NCAM1         |
| RP4-663N10.1  | RP11-16E12.1  | RP11-679C8.2  | PALM3         | GTF3C1        | TLL1         | EZR           |
| RP4-694B14.5  | ABHD4         | BCL6          | RP11-76E16.2  | EPS15L1       | FAM160B2     | OFD1          |
| GHRHR         | CACNB3        | ELL           | ARMC9         | HIST1H3A      | TMEM2        | FGFR3         |
| FOXH1         | DNAAF3        | ACTRT3        | GBP1          | SCAF11        | CDC5L        | PI4KAP1       |
| RGS17         | MUC3A         | EOMES         | SLC25A27      | RP11-465B22.3 | TULP3        | DYNC1H1       |
| RP11-361K17.2 | MUC16         | WDR26         | XIST          | CTB-131B5.2   | WAC          | PDP1          |
| SYCE1L        | SOCS6         | NONOP2        | TMC5          |               | ADCY9        | C17orf85      |
| WRAP53        | C9orf37       | MCTP2         | RBBP8         |               | ARHGAP27     | WDR6          |
| ATP8A2        | TFCP2L1       | SUPT16H       | CAMSAP2       |               | NSUN5P2      | UBN2          |
| PMS1          | THBS3         | ULBP1         | ZNF433        |               | ATP2B1       | NFIL3         |
| CNNM3         | TTL1          | GPR18         | MAPK13        |               | FCHSD1       | CAPN12        |
| CNOT3         | MF12-AS1      | RNPC3         | SYT8          |               | CSF2         | VTCN1         |
| GAK           | ESYT3         | RP11-192H23.7 | FER           |               |              | GLG1          |
| AGBL2         | SWT1          | DPY19L2P2     | PRKRIP1       |               |              | CLDN6         |
| AC107016.1    | RCOR3         | VCP           | ST5           |               |              | PKHD1         |
| AC025442.3    | RP11-39C10.1  | TM4SF1-AS1    | RP11-145A3.1  |               |              | GLA           |
| MYL6B         | PCDHB11       | RAVER1        | NME5          |               |              | HSPA8         |
| FARP1-AS1     | CST1          | SRSF3         | SMIM6         |               |              | DIDO1         |
| BSPRY         | RBMS2         | FSD1          | RP11-860B13.1 |               |              | RARB          |
| FUT2          | NPSR1-AS1     | LRRFIP1       | ILDR1         |               |              | DHX15         |
| CDC42EP1      | MAPT          | CNOT2         | CASR          |               |              | CNOT6         |
| RP11-510M2.5  | RCC2          | PTTG1         | RP11-350G8.5  |               |              | ZBTB20        |
| C3orf55       | RP11-629G13.1 | CTDP1         | CRMP1         |               |              | NEU1          |
| SLC26A7       | VILL          | IL18RAP       | LRP12         |               |              | BRD8          |



|                |               |               |            |              |
|----------------|---------------|---------------|------------|--------------|
| C9orf3         | CTF1          | TNFRSF25      | CSNK1G1    | TPBG         |
| KLHDC9         | LINC00857     | CWC25         | KRT7       | APOBEC3B     |
| PPP2R3A        | FAAH          | PTGER4        | SOX6       | SLAIN1       |
| PLEKHA6        | ZBED3-AS1     | ZIK1          | RIC8B      | MED12        |
| CTD-2302E22.3  | PKD1L2        | CTD-2089O24.1 | KRT18P28   | SLC9A3       |
| WNT7B          | RP11-627G23.1 | RNVU1-6       | TRPM3      | NKTR         |
| PHLDB2         | CHL1          | CKS2          | STK32B     | TLE2         |
| FLII           | RSPH1         | PRDM1         | CDC42EP4   | METTL12      |
| GS1-124K5.11   | AC019186.1    | GADD45B       | CABYR      | REM2         |
| CALCOCO1       | PTK7          | FMNL1         | SMG7       | hsa-mir-1199 |
| KRT18P10       | MS4A8         | GLCC1         | SMIM5      | FKBP4        |
| CTTN           | ZNF518A       | CCR4          | HNF1B      | AHI1         |
| LINC00472      | TPH1          | GPLY          | PTGFRN     | NFYA         |
| RP11-325F22.5  | SLC36A4       | USP38         | LURAP1L    | FUBP1        |
| AC092835.2     | PARP6         | RP11-727A23.7 | LINC00479  | DNAAF1       |
| ZNF251         | RP11-71N10.1  | URB2          | GTF2I      | AHNAK        |
| RP11-276H7.3   | CRIM1         | XCL1          | SSPN       | KRT15        |
| AC011747.7     | SH3GLB2       | HERC1         | CTNND1     | HEATR5B      |
| RP3-523E19.2   | ADAMTS20      | MYBL1         | MBOAT4     | DUSP18       |
| RPTOR          | RNFT2         | HIST1H4B      | TAF1C      | KRT17        |
| ADRA2C         | MAP3K10       | CTR9          | ZNF135     | AHR          |
| ZPLD1          | RIMKLB        | CTD-2031P19.3 | DLG5       | PLEKHM1P     |
| WWC2           | TRAV39        | RP3-395M20.12 | VSIG2      | CBX6         |
| DNAH14         | ARL6IP1P2     | RP11-489E7.4  | AC004540.5 | ZNF711       |
| CAPN3          | SLC6A20       | HNRNPA3P6     | NSUN7      | ASH1L        |
| SMARCC2        | CACNA1F       | RNVU1-13      | LRRC27     | RBM38        |
| CLHC1          | ARHGAP19      | ADRBK1        | ARHGAP24   | CAMSAP1      |
| KCNAB3         | KIAA1875      | BPGM          | ALMS1      | ATP1A1       |
| AMBRA1         | C8orf34       | CITED2        | PWWP2B     | RBM6         |
| C7orf55-LUC7L2 | IGSF5         | KPNA4         | ELMO3      | SERTAD2      |
| NUP214         | IRG1          | SIRT7         | DOCK7      | PLXNB3       |
| MFSD6          | SOAT1         | INO80B        | PLEKHA5    | KLF4         |
| B4GALNT4       | ACHE          | ATP11B        | MMP19      | HEXIM1       |
| RP11-411K7.1   | ZNF267        | YWHAG         | BRD3       | PGM2L1       |
| ZNF506         | RP11-1O2.1    | CCR6          | KCNJ16     | RBBP6        |
| BCO2           | CCDC8         | GATA3         | ETV1       | AC008440.5   |
| EIF3J-AS1      | UBE2D1        | LINC00441     | FSD1L      | TJP3         |
| RP11-204N11.1  | FAM120C       | WBP2NL        | SESTD1     | HID1         |
| AC002451.3     | RP11-452K12.4 | GFOD1         | CCDC148    | FXYD2        |
| DSCAML1        | ROCK1         | AC058791.2    | FTLP14     | GABBR1       |
| RP11-84C10.4   | WDR31         | BRPF1         | AC083884.8 | RIC3         |
| GAN            | ACYP1         | HNRNPUP1      | NOL10      | TLE1P1       |
| AL358781.1     | RP1-130H16.16 | GPR97         | GULP1      | PPL          |
| TRIM31         | ASXL3         | ETV3          | SAV1       | LAMB3        |
| HSPBAP1        | FUT1          | G3BP2         | VGLL4      | RRAD         |
| CHEK1          | B3GNT3        | TLE3          | YPEL2      | FMN1         |
| MBOAT1         | SLC36A1       | RAET1L        | TMEM54     | RP1-225E12.2 |
| ZNF117         | ICAM4         | ITGAD         | TMEM63A    | RNF182       |
| RP5-1158E12.3  | KCNS1         | EPC2          | CCDC24     | EXOC1        |
| AC068538.2     | HIST1H2BG     | FAM117A       | MOB3B      | BRD4         |
| FAM135B        | RP11-1C1.4    | SIK3-IT1      | COG7       | CLDN9        |
| RP11-213G2.3   | NME7          | RP11-24N18.1  | SLC44A4    | RASSF4       |
| KRTAP5-9       | RTTN          | PCDH20        | SPIB       | PLA2G6       |
| ZNF670         | LIMCH1        | SPTY2D1       | EPB41L4A   | MTG1         |
| HYI            | JUNB          | TYK2          | MAATS1     | PRSS22       |
| FOLR1          | EPHA6         | NDRG1         | RASSF7     | SOX9         |
| LRRC69         | IFI30         | PTOV1-AS1     | DEPDC1B    | WDR96        |
| PRRG4          | RP11-114L10.2 | CDK13         | ITIH5      | RRP7B        |
| PSPN           | DBF4B         | BCR           | PACSIN2    | PIEZO2       |
| RP1-122O8.7    | AL049829.1    | ZNF132        | IQCK       | IER3         |

|               |               |              |               |               |
|---------------|---------------|--------------|---------------|---------------|
| AEBP2         | LRRC7         | ZNF10        | CTB-118N6.3   | RP11-138I1.4  |
| RP11-806O11.1 | VWA7          | ZNF786       | C17orf67      | TNRC18        |
| CCDC13-AS1    | PCDHB16       | C10orf2      | FAM201A       | JUND          |
| MRE11A        | AB019439.68   | RP3-337H4.9  | VSTM2L        | SVIL          |
| GJB3          | SPNS3         | RASA2        | VEPH1         | CMYA5         |
| C2orf81       | SETDB2        | C4orf32      | ZNF219        | TNF           |
| RNF103        | KLRAP1        | DHX38        | FAM83H-AS1    | EEPD1         |
| CTA-398F10.1  | AC004381.6    | AC098824.6   | SPAG16        | IL23A         |
| PBRM1         | KRTAP2-3      | CD28         | RP11-375N15.2 | RP11-103H7.5  |
| CC2D1A        | CEACAM7       | LINC00299    | INTU          | NSD1          |
| RP4-742J24.2  | WBSCR27       | LRP8         | RP11-297N6.4  | ANO9          |
| ANXA9         | SERAC1        | EML6         | FAM150B       | NEDD4L        |
| RN7S1368P     | DZIP3         | TGFBRAP1     | NPHP1         | TCP1          |
| ARNTL2        | RP11-159D12.2 | TMEM43       | ANXA13        | PAWR          |
| C14orf105     | SYNPR         | MARK2        | TMEM30B       | AGO2          |
| IQUB          | CEP41         | AMMECR1L     | CAMSAP3       | CREBBP        |
| SIM1          | AC090587.2    | CEP85L       | ATP11A        | KLHL21        |
| C2CD4C        | ZC3H11A       | SKI          | EXOC6B        | LDLR          |
| SNAP25        | RP11-706O15.1 | IPCEF1       | PLEKHB1       | SCRN1         |
| VANGL2        | SRGAP3        | RP3-486L4.4  | EVC2          | RCBM26        |
| CLDN23        | DENND4C       | ATXN7L3      | GREB1         | PROSER2       |
| GLB1L2        | MORN4         | RP4-536B24.2 | WDFY3-AS1     | AC141586.5    |
| MYH3          | CSRP2         | TRA2A        | KIFAP3        | KLF2          |
| AC004837.5    | ZNF488        | TTI1         | CNKSR3        | GPATCH8       |
| TMEM253       | EIF4A2        | DNAJC27      | ZC3H3         | HSPA8P7       |
| RP1-40E16.12  | GUSBP2        | CCNE2        | SEMA3E        | TANC2         |
| CYP51P1       | MT-TT         | PDE7A        | LINC00511     | CPD           |
| KRT18P65      | TECRL         | LMBR1L       | PCDHGA7       | KCTD13        |
| FGFR2         | GTF2IRD1      | CABIN1       | MUC1          | IL8           |
| ITGAV         | RP11-1143G9.2 | RP13-820C6.2 | C21orf88      | DNAJB4        |
| BAGE2         | RP11-675F6.3  | AC079305.10  | C8orf4        | EPS8L3        |
| RP11-432F4.2  | RP11-334E6.3  | CD247        | TNFSF15       | FAM193A       |
| RP5-1142A6.2  | ST13P18       | KIAA0922     | RAP1GAP       | AC093110.3    |
| SHPRH         | AC006486.1    | SOCS1        | SPOPL         | TBC1D8        |
| SIPA1L1       | CTD-2008P7.9  | LRMP         | CCHCR1        | SYDE2         |
| AC016831.7    | ING1          | C22orf24     | FGD4          | UCA1          |
| PAK3          | AHCTF1P1      | IST1         | GSN-AS1       | RP11-779O18.1 |
| RP11-509J21.1 | AP001816.1    | ID2          | MORN1         | NFKBIZ        |
| RP11-181K3.4  | PCNXL2        | TRIM28       | ZMYND8        | RP11-433O3.1  |
| AL162759.1    | SYNPR-AS1     | ZNRD1-AS1    | PIGR          | OSBPL3        |
| MAP7D2        | EVA1C         | DDX21        | CDH2          | SERTAD1       |
| DDA1          | DGCR2         | TNIP1        | EHMT2         | PHC1P1        |
| RP11-298J20.4 | FAM25C        | CELF2        | DEGS2         | NSMF          |
| SCGB3A1       | CLDN18        | TOX2         | CCDC102A      | TMPRSS13      |
| NSUN5P1       | MTMR11        | SH2D1B       | EPHA5         | CACYBPP2      |
| RP11-54D18.2  | ATP10B        | AC079779.4   | ERMP1         | MIR3687       |
| RP11-298I3.4  | MTND4P11      | NABP1        | ANKS6         | SPP1          |
| AC009061.1    | C17orf47      | RUNX2        | ATP2C1        | LINC00842     |
| DYNLRB2       | PPWD1         | ODC1         | EPB41L1       | CA9           |
| INTS6P1       | ST18          | QRSL1P3      | DLG3          | RP11-727A23.5 |
| AC004471.9    | SPOCK1        | PHTF1        | ABCC4         | BDP1          |
| AC078941.1    |               | TNFRSF18     | USP54         | RP11-373L24.1 |
| FBXL2         |               | TAF3         | DNALI1        | RAB11FIP4     |
| ANXA5         |               | TMEM243      | POLA1         | C6orf141      |
| AC073410.1    |               | CRIP1        | ACCS          | SQLE          |
| MTX3          |               | RP4-738P11.3 | RP11-793H13.3 | RP1-261G23.7  |
| DUOX1         |               | RNPS1        | SLC27A1       | REXO1         |
| LYPD6         |               | CCT6P2       | KIAA1407      | BCL7A         |
| BX322557.10   |               | CCL5         | P2RY1         | EME2          |
| NEK11         |               | ADAM8        | KIAA1217      | NPIP5         |

|               |                |               |               |
|---------------|----------------|---------------|---------------|
| SLC25A25      | CCDC157        | RAB27B        | GABRE         |
| AC002550.5    | MIR4720        | GSTO2         | ANKRD17       |
| GNL3L         | ZCCHC2         | INF2          | ELF1          |
| KB-1615E4.2   | KBTBD2         | DPCR1         | 38777         |
| KRT8P46       | SDE2           | PLS1          | TGIF2         |
| GRB10         | SUCO           | CHST4         | CD83          |
| RP11-56G10.2  | SLC7A5P1       | SENP6         | RP6-218J18.2  |
| SEMA5B        | PBXIP1         | RIF1          | RP1-67K17.3   |
| ZDHHC8        | ZNF615         | S100A14       | SAFB2         |
| LAYN          | ZNF746         | MAML3         | IL18          |
| VWDE          | RP11-247I13.11 | SCGN          | NCK2          |
| AGAP8         | FAM214B        | ETV4          | ITGA6         |
| HOMER2        | USP36          | BEND7         | BAG3          |
| DSCAM         | S100PBP        | STXBP5        | AP001615.9    |
| SLX4          | N4BP1          | PKP4          | USP11         |
| AC114755.3    | ZNF37BP        | CYTH2         | NOTCH2        |
| MBD6          | PRKCH          | CPM           | NEURL3        |
| PSORS1C1      | KIAA0226       | BCAR1         | CHTF18        |
| NPC1L1        | HINFP          | ADAM10        | KDM6B         |
| AL009178.1    | STAG3L2        | RABGAP1       | ATXN2         |
| CIC           | TTC14          | C11orf35      | RASSF9        |
| TTC28         | WDR37          | SETD5         | BMP2          |
| NLRP2         | MTCP1          | TNKS          | NET1          |
| MOK           | RAB9A          | MIR4454       | CLDN10        |
| MIR616        | ICOS           | NR6A1         | USP43         |
| CTD-3092A11.1 | AREL1          | WDR60         | NFAT5         |
| ZNF300        | KDM2B          | USP2          | TAF1D         |
| RHOB          | IGF2R          | KLC3          | GIGYF2        |
| RP11-196H14.3 | POM121C        | UBD           | TNFRSF19      |
| OR2B11        | SKIL           | KRTAP5-AS1    | MAB21L2       |
| TNFAIP8       | TOP2B          | VPS13A        | VPRBP         |
| PKD1L1        | NOD2           | RAB36         | IRS2          |
| RBM47         | HTR2A          | CTA-293F17.1  | RHOV          |
| PNMAL1        | ARMC5          | PICK1         | GPRIN2        |
| ABCA17P       | AMPD2          | BEX4          | PIM3          |
| ZNF256        | HAUS3          | HYDIN         | PTPN14        |
| IKBKE         | LPIN1          | ZG16B         | CUL3          |
| BEX1          | PITPNC1        | ANKRD9        | FAM160A2      |
| CCDC169       | MKRN1          | ZBTB20-AS1    | MUC20         |
| CYP51A1       | CCP110         | RP11-334A14.2 | ARHGAP26      |
| TMPRSS11F     | AC104134.2     | DROSHA        | ITGB8         |
| MSH2          | RP11-157G21.2  | OSGIN2        | CDK16         |
| EFCAB6        | SBNO1          | RAP2B         | NPNT          |
| PHF14         | AF127577.11    | PVRL2         | KRT8P33       |
| AQP1          | PRPF40B        | ZNF629        | IMPDH1P10     |
| HEXIM2        | RP3-508I15.18  | KRBA2         | CDKN2B        |
| PCDHB3        | MAP1LC3B2      | KDM3B         | WSB1          |
| ZBTB20-AS2    | B4GALT5        | LIMK2         | CDR2L         |
| RP11-18B16.2  | TTC4           | INTS3         | RP11-325F22.4 |
| RP4-798A10.2  | BACH2          | ARHGEF40      | CFLAR-AS1     |
| PGC           | SETD4          | C7orf13       | VEGFA         |
| RP11-844P9.2  | MAP2K3         | FAM60A        | SREBF2        |
| RP11-434I12.2 | SYT16          | ZNF618        | LAMA1         |
| AMY2B         | TRIM36         | PKN2          | CSRNP1        |
| PLEKHS1       | RP6-99M1.2     | SH3RF2        | RP11-796E2.4  |
| TCTN2         | HGS            | PRKAA2        | SETBP1        |
| TYW1B         | DDX20          | SGPP2         | ITGA2         |
| RP11-265N7.1  | NDEL1          | MUC19         | CTD-2228K2.7  |
| RP5-997D24.3  | RBAK           | RP11-532F12.5 | TEX26         |
| Y_RNA         | PIM2           | ARHGEF37      | MAST4         |

|               |               |               |                |
|---------------|---------------|---------------|----------------|
| RGMB-AS1      | KMT2C         | KRT18P38      | RP11-354M1.2   |
| SEC14L4       | CPNE7         | DSC3          | ZBED6          |
| GMNN          | ZNF235        | SERTAD3       | MYC            |
| LINC00265     | PDE4A         | EBF4          | MFI2           |
| RP11-680F8.3  | SATB1         | C8orf47       | SLC37A1        |
| SEMA5A        | SLC5A8        | MYO3A         | GGT6           |
| DUSP16        | XYLT1         | WBP5          | ZC3H12C        |
| LRRC16A       | RP11-597A11.4 | NFIB          | RP11-388M20.6  |
| IFT57         | BTAF1         | KRTAP3-1      | TMEM132A       |
| WDR52         | COLQ          | SPNS2         | HLA-V          |
| CES4A         | AGO3          | PCDH19        | BAIAP2L2       |
| TDRD1         | RYBP          | CLINT1        | RP11-405A12.1  |
| RP13-516M14.4 | KLRB1         | FGF9          | MAGI1          |
| CSRNP2        | ZBTB17        | FOXA1         | KNOP1          |
| GATAD2B       | CD3EAP        | ERBB3         | LAMA3          |
| METTL3        | NLRC3         | DDIT3         | ARID2          |
| THRAP3P1      | FNBP1         | CYS1          | SMG1           |
| TAOK1         | ZNF224        | FLJ11235      | SP4            |
| VSIG10        | IL2RG         | RP11-728F11.3 | KIF1B          |
| RP11-173P15.5 | AFF3          | PRSS50        | HUNK           |
| USP44         | ESM1          | SLC6A19       | GNA13          |
| DPP10         | KHNYN         | NPEPL1        | VPS37B         |
| LHX9          | RP11-325P15.1 | TMEM198B      | AMOTL2         |
| TUBB4A        | TSPAN32       | MDK           | TNFAIP3        |
| PISD          | VAMP2         | SPTB          | FOXO1          |
| SEMA3C        | ZAP70         | CTD-2033D15.1 | KIF5C          |
| SCARNA17      | HECA          | ALOX12P2      | NAA40          |
| MNX1          | AC108676.1    | ANKRD50       | DUSP10         |
| DPCD          | AC017104.6    | C21orf62      | TRIP10         |
| RP11-390F4.6  | MATK          | PATZ1         | NEK10          |
| ZNF833P       | CCDC59        | KIAA1456      | TSEN54         |
|               | NUDT4P1       | CA2           | ARGLU1         |
|               | ANXA1         | PPM1L         | RP11-1033A18.1 |
|               | RP11-427H3.2  | RP11-1220K2.2 | NCOA6          |
|               | APOBEC3D      | FRK           | KIAA0556       |
|               | AXIN1         | PAPSS1        | UPF1           |
|               | RP11-286O18.1 | HIF1A         | ZSWIM4         |
|               | MATR3         | RP11-473M20.5 | TARBP1         |
|               | TM9SF1        | SLX4IP        | FBXO30         |
|               | AC009495.2    | PKMYT1        | EFCAB4A        |
|               | CHMP4BP1      | ADCY6         | TRIM16         |
|               | ZNF764        | C16orf46      | RP1-43E13.2    |
|               | VCPIP1        | TGFA          | SLC2A1         |
|               | MIR181A1HG    | CFTR          | MT-RNR1        |
|               | FBXL6         | ARHGAP44      | EPCAM          |
|               | PTK2B         | THOC6         | RECQL5         |
|               | NUP210L       | KLHL29        | RP11-1007O24.3 |
|               | MSN           | RHBDL2        | TRIM47         |
|               | RHOF          | RNF214        | WEE1           |
|               | USP20         | NIPA1         | SMURF2         |
|               | RAB8B         | RP11-328C8.4  | ARHGEF5        |
|               | HSPB1P1       | APCDD1        | GPBP1          |
|               | PHLPP2        | PRSS16        | ZNF862         |
|               | ARHGAP17      | FAM84A        | SLC26A6        |
|               | NOM1          | CNKSR1        | FAM84B         |
|               | STAM          | TMEM163       | CCDC64B        |
|               | MECP2         | FAM189A1      | TULP2          |
|               | ZNF202        | ZNF185        | TNRC6B         |
|               | LINC00936     | DOCK5         | SRRM1          |
|               | RP11-159G9.5  | IFT81         | ZNF608         |

|               |               |               |
|---------------|---------------|---------------|
| CD55          | PLEKHA8       | PABPN1        |
| CMIP          | PLLP          | GBA2          |
| LNPEP         | PHF13         | FBRS          |
| CARD11        | COBL          | ECT2          |
| PLEKHA8P1     | AMOTL1        | KIAA1109      |
| PTGDR         | KRT8P45       | ZNF165        |
| CDK12         | NFKBIE        | PPARD         |
| DDX27         | TTC6          | HMGCR         |
| LINC00484     | BRPF3         | KRT18P17      |
| AKIRIN2       | SOWAHC        | MCF2L         |
| CYSLTR2       | FAM227A       | PNISR         |
| CTD-2368P22.1 | CDK19         | SCTR          |
| RP11-727F15.9 | PARP3         | ZNF577        |
| CLEC2B        | NRBP2         | NPAS2         |
| CCDC137       | CTD-3080P12.3 | EGR4          |
| MGAT5         | SLC34A2       | IGHMBP2       |
| SLC2A3        | CRTAC1        | MAP3K14-AS1   |
| MATN1-AS1     | KLHL17        | FAM73B        |
| TNFRSF11B     | CITED4        | VIL1          |
| RNF34         | SSX2IP        | KCNH3         |
| MYH9          | CGN           | LMO7          |
| NKRF          | ARRDC1        | HNRNPH1       |
| CLK2          | BCL11A        | KDM5B         |
| C12orf61      | CBR3-AS1      | SRCAP         |
| FAM133B       | RFX4          | PPP1R13L      |
| GNG10         | LCN2          | GOLGA7B       |
| CTSW          | WWP2          | UBASH3B       |
| NEFM          | FZD1          | PPP1R15A      |
| NOP2          | FBXL18        | ZCCHC6        |
| GPCPD1        | ADAM22        | AC004623.2    |
| ANKRD28       | F3            | MDC1          |
| KATNA1        | C1orf186      | GRAMD1B       |
| STAT4         | RP11-388M20.2 | ANKRD18B      |
| TSC22D3       | RP11-103C16.2 | FEM1C         |
| CASP8         | HKDC1         | DYRK3         |
| TAP1          | HNRNPA1P33    | TCP1P1        |
| FCRL3         | PARD3B        | RCOR1         |
| FLNC          | TESC          | MKNK2         |
| ZRSR2         | ANXA4         | PCDP1         |
| PLCH2         | KCNJ15        | RP11-317J10.2 |
| ITSN2         | PARD3         | TRMT1         |
| LINC00338     | ONECUT2       | IGF2BP2       |
| FBRS1         | NRG1          | RP11-356I2.4  |
| PRDM4         | SNHG14        | URGCP         |
| SLC1A5        | GAB1          | TRAF6         |
| LPXN          | TRNP1         | KRT80         |
| DLL1          | RND1          | PLD2          |
| SMC4          | SPINT2        | DNAH7         |
| DBF4          | RASSF6        | CSNK1E        |
| PPTC7         | FXYD3         | TUBB2B        |
| HOXA3         | PRKCA         | BBS9          |
| RAB21         | DNAH5         | PLCH1         |
| PDCD7         | ATP8B1        | FAM83B        |
| FOXJ2         | BHLHE40-AS1   | NBPF18P       |
| KLRC2         | PDGFC         | IFT172        |
| ZFP36L2       | ANXA11        | FAM102A       |
| FBXO33        | TOB1          | IRAK2         |
| DYRK2         | WDR66         | CBX4          |
| STAP1         | PHF21A        | AGRN          |
| NKG7          | CDK10         | ZSCAN12P1     |

|                |              |               |
|----------------|--------------|---------------|
| IL17A          | RP11-867G2.8 | GOLGB1        |
| NOTCH2NL       | NPHP3-AS1    | ATP9A         |
| CDKN2D         | AC078883.4   | CHD7          |
| HIST3H2A       | KLHL24       | HNRNPA2B1     |
| TNFRSF4        | SLC39A6      | GADD45A       |
| C17orf107      |              | TSC1          |
| CDK6           |              | AC004447.2    |
| AP4B1          |              | CTA-29F11.1   |
| KLLN           |              | MESDC1        |
| HIST1H2BN      |              | SBF1          |
| TIGIT          |              | RP11-473M20.7 |
| KLRK1          |              | AC093838.4    |
| LYST           |              | OCLN          |
| AIM1           |              | NELFA         |
| KIF20B         |              | MYSM1         |
| P2RX5          |              | MMP14         |
| SMARCA5        |              | RBM14         |
| NCR3           |              | EIF3A         |
| GMIP           |              | THSD7A        |
| SYNRG          |              | KIF12         |
| ZBTB16         |              | KLHL15        |
| VIM            |              | CXCL2         |
| ARHGEF3        |              | NBEA          |
| B4GALT6        |              | CLDN3         |
| CSNK1G2        |              | BTN2A2        |
| CD7            |              | MUC6          |
| RHEBL1         |              | ADAM28        |
| NLRP7          |              | CARD10        |
| PDPK1          |              | B4GALNT3      |
| DENND4B        |              | AFAP1         |
| IL22           |              | FCHO1         |
| AE000661.37    |              | TMEM136       |
| STX11          |              | ZFP36L1       |
| PRKX           |              | PAPD7         |
| AC005253.2     |              | CAPN2         |
| RP13-1032I1.7  |              | NKX3-1        |
| RP4-778K6.3    |              | CHD2          |
| GNG4           |              | ANKRD36C      |
| CTD-2105E13.13 |              | NR4A1         |
| CD97           |              | ARHGEF28      |
| RP11-1094M14.4 |              | TSC22D2       |
| ITPRIPL1       |              | C6orf222      |
| MADD           |              | NEO1          |
| PCDHGB2        |              | TMPRSS3       |
| RNF168         |              | FUT3          |
| SMEK1          |              | ZNF142        |
| CSNK1D         |              | ZHX2          |
| CCNJL          |              | KRT19P1       |
| SNHG7          |              | SMARCA4       |
| AP000783.1     |              | BAZ2B         |
| RNU4ATAC       |              | MCOLN3        |
| ADRB2          |              | ZBTB21        |
| AC022182.3     |              | NFE2L3        |
| GABPB1         |              | MPRIP-AS1     |
| RP11-540A21.2  |              | BOD1L1        |
| CENPC          |              | PRPF8         |
| RP11-383J24.5  |              | CTSE          |
| GNL1           |              | GLIS3         |
| RIOK3          |              | TNKS1BP1      |
| RP11-431M7.3   |              | TCERG1        |

TTC7A  
KAT6A  
H2AFZ  
PNPLA8  
RP2  
KRI1  
RNF138  
SKIV2L  
ZNF184  
HEG1  
KRT81  
PRNP  
RP11-1407O15.2  
PSME4  
HMGB2  
MTMR9  
CTC-308K20.1  
HMGA2  
ARIH2OS  
XCL2  
TOPORS  
KCNJ14  
ZC3H18  
LINC00861  
NUP210  
ZNF831  
EFCAB4B  
XXbac-BPG299F13.17  
SLC4A10  
ACAP1  
SAP30L-AS1  
CXCR5  
RIN1  
ITGA4  
SPINK2  
IRF4  
SLCO4A1  
RGS2  
AP5Z1  
FASLG  
MOB3A  
ZBTB42  
PTMA  
PRDM11  
SNHG3  
HLA-F  
IVNS1ABP  
ZNF394  
CLSTN1  
ZNF701  
DENND5A  
NUP98  
HIST1H3H  
ZNF276  
FTH1P4  
RP11-58H15.1  
RORA  
IL2RA  
TBCC  
TBC1D13

UBE2O  
ANKRD36  
KLF5  
DPH7  
LAD1  
EHD4  
GABRP  
PDE5A  
TACSTD2  
CPEB4  
FAM179B  
RP11-69M1.4  
TCTEX1D4  
THBS1  
TUBA1C  
ABL1  
RAI2  
KIF27  
SRGAP1  
TNFRSF21  
UBE2H  
RP11-344B2.2  
KIAA1967  
SMPD3  
STIP1  
C15orf39  
HSP90AB1  
PMAIP1  
SEMA6D  
SLC3A2  
IER5  
SYNE1  
XXbac-BPG252P9.10  
CMTM4  
NCL  
UVSSA  
KRT8P36  
ADCY10P1  
WDR27  
MACC1  
C10orf118  
ZBTB10  
CEP192  
CRAMP1L  
KIAA0895  
GUSBP11  
ARHGAP5  
EZR-AS1  
MZF1  
PHLDA2  
WFDC2  
GPR56  
PAN3  
REPS1  
FBXW7  
MED15  
MTA1  
ZBED4  
SBK1  
SETD1B

|               |               |
|---------------|---------------|
| ARHGAP9       | C16orf93      |
| ZNF597        | SLC25A36      |
| LONRF3        | PPP2CA        |
| NCS1          | RAB11FIP1     |
| SNORD13       | PHF15         |
| TNFSF4        | POLR2A        |
| YWHAZP3       | PPRC1         |
| NOP56         | HSPA8P8       |
| LINC00528     | LUC7L3        |
| NUDT11        | CAMTA2        |
| TXK           | HIP1R         |
| CLIC3         | FILIP1L       |
| C17orf96      | CA3           |
| IL12RB2       | LRRC1         |
| NLRC5         | ESRP1         |
| GLTSCR1       | KRT19         |
| PIK3CG        | AKAP8L        |
| SNHG5         | FLRT3         |
| RP11-44M6.3   | NR2C1         |
| RP11-110I1.12 | RP11-713P17.3 |
| ZNF876P       | VCAN          |
| IRGM          | ZDHHC21       |
| AC064852.4    | THAP9-AS1     |
| SEMA6C        | GLS           |
| MBNL1         | TGIF1         |
| NUP160        | HSPA7         |
| IL2           | RP3-395M20.8  |
| ARRDC3        | MAFG          |
| ZNF844        | SPAG1         |
| SLC1A4        | PIDD          |
| AL353898.2    | BICD2         |
| IQGAP1        | TM4SF1        |
| CCDC65        | SHANK2        |
| HSPA5         | JUP           |
| RP11-474I11.7 | SLC41A1       |
| PUS7          | MAMDC4        |
| MIR142        | DZIP1L        |
| FGF2          | C3orf58       |
| EPG5          | PAXBPI        |
| DPH2          | SETD1A        |
| PPP4R1L       | PURB          |
| MICB          | ZCCHC11       |
| NCR1          | RELB          |
| DNAJC2        | LAMB2         |
| MTRF1L        | KIF3A         |
| CAPRN2        | EHD1          |
| PCM1          | MARCKSL1      |
| GTF3C4        | RAB11FIP5     |
| FANCI         | BRD2          |
| SLC16A3       | SLC7A1        |
| ATP1B3-AS1    | PTPRM         |
| FGFR1OP2      | KAAG1         |
| RP11-247A12.2 | CUL7          |
| SNHG17        | LAMC2         |
| ETS1          | SPSB1         |
| CIRBP-AS1     | RP11-224O19.2 |
| C9orf131      | SEMA4F        |
| U2AF1L4       | ABCA2         |
| MIR155HG      | APOBEC3B-AS1  |
| RP11-57H12.3  | SLC35F2       |



TCIRG1  
CDK5R1  
HSH2D  
EID3  
FCRL4  
HOXA9  
NPPC  
TMEM201  
DKK1  
NRIP3  
LRRN3  
RP11-465L10.10  
EFTUD1  
ARID3B  
MAP9  
BRD7P3  
RP5-1073O3.2  
IL7R  
SRSF2  
PCDH9  
HAUS5  
CCDC88C  
GGNBP2  
CD96  
DENND1C  
RP11-432J9.5  
EWSR1  
ORAI2  
INTS4  
MST4  
TBC1D10B  
PPP1R16B  
ZNF337  
CTNNA1  
OXSR1  
RPL41  
SLC38A1  
PHF20L1  
HMMR  
PPP2R2B  
PKM  
GBAP1  
S1PR5  
RP11-436I24.1  
NOLC1  
CCND2  
ZBED2  
ABCA7  
SART3  
APOBEC3G  
C6orf25  
GPRIN3  
MYO1G  
PGBD2  
RP1-1J6.2  
RALGAPA1  
SIK3  
CTC-548K16.5  
MAK  
TRGV9

RP11-256P1.1  
AC024940.1  
SNHG12  
CFLAR  
AP006621.8  
RASSF8  
HELZ  
TRAK1  
ZMIZ2  
PTPRJ  
ADM  
RHPN2  
TCF20  
MAPK8IP3  
ANKRD33B  
ELMSAN1  
MXD1  
ASXL1  
TUBB4B  
NUAK2  
PER1  
RBM39  
WDR90  
KLC2  
SH3RF1  
WHAMM  
CLDN1  
RP6-145B8.3  
SIRT1  
ABCC1  
FOSB  
MED26  
FAM46C  
OVOL1  
UPF3B  
TPPP  
AC011841.1  
DDX39B  
DEDD2  
HMGCS1  
SNRNP200  
TLE4  
NFKBIA  
RP11-161H23.5  
RP11-145F16.2  
HNRNPLP2  
ZNF821  
RPL23AP79  
MPRIIP  
ZFAND2A  
FAM117B  
UPF2  
GSE1  
KRT8P3  
JMJD7-PLA2G4B  
MIR24-2  
CKMT2  
NCOA7  
ANKRD18A  
ERRFI1

ZNF282  
HIST2H2BF  
37135  
TCF7  
RP11-275114.4  
FANCE  
MAP4K4  
DOCK3  
ZNF436  
KIF21B  
RP11-229C3.2  
RP11-338C15.5  
ZNFX1  
CD69  
LTA  
TRIM59  
TSNAXIP1  
MGEA5  
CYP46A1  
RRNAD1  
VPS13C  
CASP2  
RANBP2  
snoU13  
C4orf26  
RP11-545M17.1  
TNFSF14  
FBXO32  
DDX3X  
TRDC  
POLR3D  
AC009404.2  
SYTL3  
IL2RB  
SNAP91  
SLC52A2  
DDX3YP3  
ZNF600  
TRAF3IP1  
CTC1  
HIPK1  
STK17B  
RP11-809N8.2  
KCTD9P2  
GPR61  
SERHL  
SPTY2D1-AS1  
OFD1P17  
ZNF622  
RP11-799D4.4  
ZNHIT6  
HIST1H2BF

INADL  
ENGASE  
DENND6B  
ADNP2  
RBM25  
UBE2FP1  
ARHGEF19  
TPR  
MAP1S  
BCL10  
INO80  
DTX3  
AC006128.2  
GSTM2  
RP4-816N1.7  
LDOC1  
TNPO2  
UGT8  
COL27A1  
SAMD4B  
HNRNPU  
PLAUR  
ATXN2L  
SLC4A4  
SCAF4  
MUM1  
BHLHE41  
CLASRP  
MAP7D1  
BRAF  
FAM222A  
SRRM2  
AAK1  
CYR61  
DTNA  
RP11-496I9.1  
MAFF  
GIGYF1  
PVRL4  
MYBBP1A  
TCOF1  
RGL4  
ZNF503  
ARSJ  
NR1D1  
SYNGR1  
AC009505.2  
PARD6B  
HIST2H2BE  
SLC38A11  
PPM1D  
TP53BP2  
ZBTB40  
MEDAG  
CHST3  
SPC24  
MAP3K9  
ABLIM1  
NCR3LG1  
SLC19A2

PVR  
B3GNT2  
SAFB  
RFX2  
MLLT4  
TMTC2  
MYADM  
ANKZF1  
DUSP8  
L3MBTL1  
LBR  
PLXNA3  
RLF  
MLXIP  
BAIAP2L1  
B3GNT5  
MAP4  
C1orf106  
OTUD1  
HIVEP1  
ATRX  
TNIK  
SOX7  
IER2  
NMB  
CTD-2369P2.8  
ZSCAN18  
TGFB2  
KMT2E  
TRAF3IP2  
WNK2  
HSPB8  
EHF  
CTNND2  
NUFIP2  
TAF4B  
RP11-530C5.1  
SLTM  
SLC28A3  
RP11-498C9.12  
TRIO  
MEX3B  
TC2N  
RP11-617D20.1  
TICAM1  
RDH13  
RP4-541C22.5  
KCNF1  
ZBTB34  
FOXQ1  
SYNE2  
POLG2  
DSP  
TUG1  
IRF1  
MIR3188  
IRF2BP2  
SOX4  
DNAJB1  
ALPK3

FLVCR1  
RALGAPA1P  
PROM2  
BIK  
SOGA2  
RC3H1  
AC015971.2  
PKD1  
ATAD2B  
SFPQ  
KIAA1522  
AKAP7  
CROCC  
CLDN4  
TOP3B  
RP11-554I8.2  
ARL14  
FAM46B  
SNIP1  
HLA-H  
KIAA1683  
EPHA2  
MAML2  
CLCN6  
NFATC1  
SAMD12  
SNRNP70  
RP11-203M5.8  
PLK3  
YOD1  
SMAD3  
KDM5C  
ATF3  
PLP2  
ANKRD10  
SLC16A7  
ZNF43  
ITGB4  
CCDC141  
DVL2  
RBM33  
BTG1  
RP3-510L9.1  
CNOT4  
DUOXA2  
FLYWCH1  
THOC2  
MYO6  
DNAJA4  
RP11-745A24.1  
RAP1GAP2  
TRPV6  
RP11-708J19.1  
ARL5B  
RBM24  
GRB7  
GON4L  
SWAP70  
C1orf63  
PM20D2

HBEGF  
RP1-31316.12  
ZNF574  
RASAL1  
CSF1  
CEP170B  
TIPARP  
CRYAB  
PTHLH  
MAP3K14  
USP24  
NUP153  
CCSER1  
SLCO3A1  
DUSP2  
ZNF692  
SEC31B  
SUPT5H  
PPAP2C  
ELF3  
SRRM1P3  
MYEF2  
SLC4A3  
BCL9  
MAGI3  
ZBTB2  
GALNT5  
PLXNB1  
CHD3  
SFSWAP  
REC8  
CTSV  
DUOX2  
TSC2  
NRIP1  
IFFO2  
CPSF7  
RP11-61J19.4  
TBC1D22B  
ARID5B  
TSGA10  
SPTAN1  
ARL4C  
SCD5  
RP11-770G2.5  
NCEH1  
DSG2  
JAG1  
DCUN1D3  
IRF6  
HSPA4  
CCRN4L  
NEAT1  
PRKCD  
DSC2  
ATP13A4  
MYO10  
ZNF407  
TTC18  
BCL9L

SUN1  
RBM19  
RUNX1  
HSPA4L  
ENAH  
LIPH  
FOXO6  
RASEF  
EGR1  
SLC12A2  
ESRRG  
RIPK2  
HDAC9  
PTGFR  
APLP1  
GRHL2  
STOX2  
DNAH1  
CRY1  
SELE  
KIAA1549L  
ABCB1  
FAM171A1  
NAA16  
HECTD4  
ELOVL7  
PIM1  
USP9X  
ZBTB43  
PCLO  
KLF6  
USPL1  
RP11-1149O23.3  
ATHL1  
TMEM171  
ZC3HAV1  
ANKRD42  
PDE9A  
LSMEM1  
EPS8L1  
KCNQ1OT1  
SERPINB2  
CCNL2  
NPTX2  
SNAPC4  
CLCN2  
SLC9A7  
ZFHX4  
LRIG3  
ABTB2  
ZNF236  
TSPYL2  
TUFT1  
MYOF  
ZC3H12A  
LUC7L  
C2CD4B  
MAP3K8  
FA2H  
RP11-463O12.3

DDX26B  
EGR2  
ZNF281  
RAD51-AS1  
WWC1  
PLEKHG3  
PRORS1P  
SMOX  
UNC13D  
SMAD7  
ZNF516  
HSPA8P1  
ITGB6  
HIST1H2BB  
CDC42BPG  
RNF19B  
GOLGA8A  
RP11-732M18.3  
RGL3  
ABCC3  
RP11-849H4.4  
PIP5K1A  
CSF3  
REV3L  
EXOC8  
KIAA1244  
RP11-152K4.2  
HSPA6  
C11orf95  
SLC38A2  
SYNJ2  
SLC25A29  
CD2AP  
CCL20  
FAM83E  
SPHK1  
ATN1  
ADAM9  
RP1-102K2.6  
DNAJA1  
HSF4  
GPR176  
ZNF296  
TNK2  
ZSWIM8  
DENND4A  
ANKRD11  
LRRN4  
NICN1  
HLA-K  
DUSP1  
SEZ6L2  
NFKBID  
OR2I1P  
H3F3C  
PLEKHA7  
CNNM4  
SIPA1L3  
SPEN  
ENTHD2

GPRC5A  
GBP2  
ZNF217  
AC034220.3  
AGPAT4  
KANSL1  
FAM53C  
RP4-816N1.6  
GALNT12  
FLNB  
MFSD10  
CRTC2  
ZBTB7A  
PRRC2C  
STK33  
ARHGEF18  
HSPA1A  
PFKFB3  
EREG  
DIRAS2  
MCAM  
CDH6  
MIR3648  
SLC5A9  
ZSWIM6  
RP3-416H24.1  
AC016629.8  
SLC52A3  
SFN  
PPP1R10  
TRIB1  
TJP1  
LCA5  
LENG8  
RALGDS  
ASPHD1  
PER2  
SLC26A11  
SETD5-AS1  
DFNB31  
NXF1  
DNAJA1P3  
SLC4A7  
PPP1R26  
SEMA3B  
CCDC40  
ADCY8  
PTCH1  
S100A6  
TP53BP1  
RP11-611E13.2  
TFRC  
AC139100.2  
DNAJB6  
EPC1  
DHX34  
TES  
BCOR  
PELI1  
ILF3



MLLT3  
HSPA8P9  
LARP6  
RP11-98I9.4  
SLC35F3  
DCDC2  
JOSD1  
KAT2A  
DYNC2H1  
AKAP17A  
LEMD3  
KLHL25  
CHKA  
RP11-153M3.1  
SLC35E2B  
PIEZO1  
PKD1P6  
RP11-611L7.1  
MAP3K1  
MST1L  
MB21D1  
ATG16L2  
39873  
MAP4K5  
LAMA5  
TNFRSF12A  
DIS3L2  
EGR3  
FREM2  
IFRD1  
KCTD9  
HSPA8P5  
MCL1  
S100A11  
LAMC1  
DOT1L  
NEB  
EIF2AK3  
RPRD2  
CHMP4B  
AC066593.1  
TMPRSS2  
IL6  
RP11-73E17.2  
CCDC93  
CTGF  
ENKD1  
AC008937.2  
PTBP1  
BRD1  
LPAR2  
KRTAP1-1  
ZNF335  
LMTK2  
ATF7IP  
SEMA6A  
SNORD12C  
FOKK1  
RP11-779O18.2  
TRPM4

ZCCHC14  
ISYNA1  
CREB5  
MLK4  
HSP90AA1  
ZNF316  
RNF213  
RP4-781K5.2  
DHX9  
CLK1  
WDR47  
DNAJC6  
DALRD3  
THAP2  
HSPD1P6  
JAG2  
KIFC3  
STX3  
PTPRK  
MST1R  
MFSD6L  
CLUHP3  
PHRF1  
CACNA1D  
VEZF1  
ACSS1  
FOSL2  
OGT  
MRPL18  
MSL2  
RNF207  
EPPK1  
RHPN1  
CCDC84  
MYLIP  
PHIP  
RP11-676M6.1  
LRIF1  
NBEAL2  
SCAPER  
HSPB1P2  
TMEM158  
AC005785.2  
TSPAN15  
NPHP4  
SFRP5  
IKZF2  
TNC  
MYH14  
RP1-163G9.2  
PILRB  
TUBB2A  
PAPD5  
SACS  
WWTR1-AS1  
SERPINH1  
UBE2S  
SH2D3A  
TLE1  
FAM83G

PTPRD  
CDYL2  
PLK2  
SGK223  
KIAA0247  
SMURF1  
ONECUT1  
CCNL1  
BCL2L11  
PRSS12  
RP11-54F2.1  
INHBA  
KLF7  
AHS1  
DMKN  
CPSF1  
USP31  
RAI1  
LRRC24  
HIVEP2  
KCNH8  
MYRF  
CPEB2  
BPTF  
NPEPPS  
RP11-75N4.2  
MIR3654  
MLLT6  
PIWIL4  
JMJD6  
BX470102.3  
WIPF2  
AL358113.1  
FAM60CP  
PCF11  
IQCA1  
SLC7A5  
MED17  
RP4-734G22.3  
PIGA  
RREB1  
PABPC1L  
FNBP4  
DNMBP  
CBL  
STXBP6  
CTD-3149D2.4  
ANXA8L1  
SLC35E4  
MGA  
EIF4A1  
AP1G2  
JMY  
ADORA1  
PLEKHN1  
KDM4C  
DAB2IP  
ZFC3H1  
SDK1  
RP11-802E16.3

HNRNPD  
FAM46A  
HOMER1  
KIFC2  
CDH1  
FOS  
CAD  
BAZ2A  
FADS3  
HOOK2  
PDZD8  
ABCC10  
TFAP2C  
HNRNPM  
TET2  
PLEKHM1  
MSX1  
WNT10A  
AKAP9  
SLC20A1  
CX3CL1  
ARAP2  
SF3B1  
ICAM1  
SIX4  
ABHD3  
JARID2  
USP34  
SHISA9  
SPINT1  
PAQR5  
SHROOM3  
AC116366.6  
MICAL3  
SLC9A1  
MSI2  
PRR7  
PLEKHG6  
PLEC  
LINC00271  
AC093673.5  
RP11-510N19.5  
WNT2B  
EDC4  
ASNS  
MPZL3  
UBAP2L  
CTD-2165H16.4  
CASZ1  
CDKN2AIP  
CXCL1  
BCAS1  
RP11-144L1.8  
EXD3  
SGMS2  
MON2  
CNTNAP2  
TNFRSF10B  
RP11-286E11.1  
CHD4

BICC1  
RASD1  
TRRAP  
TRAF1  
DBN1  
SLC45A4  
MIR600HG  
ADAP1  
SLFN13  
RP11-473M20.16  
MAP2  
PROM1  
CTB-59C6.3  
FLRT2  
DST  
KRT8P12  
ATP1A1OS  
TTLL3  
KMT2A  
ST14  
CYLD  
RHBDF2  
KIAA1468  
JMJD1C  
XXbac-BPG181M17.6  
PRRC2A  
STK35  
S100A10  
NOS1AP  
FAM189A2  
SAP30BP  
RUSC2  
BAZ1A  
RRP12  
ABHD11  
ZCCHC8  
ARHGEF1  
CDKN1C  
HIN1L  
HSPH1  
RP11-96K19.2  
ARID4A  
RP11-64B16.2  
OTUD7B  
KIF13B  
SUGP2  
ANKRD12  
PI4KAP2  
DDX51  
GBF1  
VCL  
TTYH1  
IRGQ  
UBQLN1  
RAVER2  
SMC5  
FAM211B  
POU2F3  
RARG  
BACH1

ARC  
LINC00671  
CUL9  
C11orf63  
LINC00152  
REL  
SLC29A2  
MPP3  
TTN  
GLRB  
RP5-821D11.7  
YBX3P1  
AKAP13  
WWTR1  
ALS2CL  
C6orf132  
TNFAIP2  
RASAL2  
KLK10  
RP11-66N24.4  
AL136376.1  
PTBP2  
TCF7L2  
NEDD9  
ME3  
HSPA1B  
SMPDL3B  
CACYPB  
FAM221A  
CXCL5  
GPD2  
AP1M2  
MMP25  
SCNN1A  
IDUA  
ZMIZ1  
CHERP  
FSTL3  
ZNF462  
HSP90AB3P  
CDC42BPB  
CXCL6  
SGSM2  
CAPN10  
FOXP1  
CUEDC1  
SLC5A1  
EPHB6  
TJP2  
SCRIB  
RSRC2  
PAPLN  
SLC9A8  
CDCP1  
EDN2  
YBX3  
SHISA2  
ITPKC  
MALAT1  
KSR2

ENC1  
POMT2  
ACD  
SPATA13  
CEP152  
SREK1  
TUBGCP6  
ADAMTS10  
GAREM  
PRDM15  
RP11-638I2.6  
PRSS8  
GPRC5B  
NUMA1  
VTRNA1-3  
CD24P4  
SUPT6H  
ARID4B  
GKAP1  
FAM193B  
AC012487.2  
KDM5D  
RNF19A  
ZNF326  
RP11-1100L3.8  
AGAP1  
ANKRD1  
FREM1  
DDR1  
ZNF592  
PMEPA1  
TNFSF9  
STX16  
THSD4  
ZNF266  
LMNA  
PRICKLE1  
PEG10  
HES4  
KCNK5  
FOXO3  
ZBTB5  
B3GALNT2  
SRSF5  
ZXDB  
37681  
RP5-1142A6.9  
PRR26  
TTN-AS1  
MCF2L2  
KLK11  
KIAA0754  
MFHAS1  
MEX3C  
CTC-250I14.6  
HMGA1  
TFPI2  
YTHDC1  
ERN1  
JUN

UBE2SP1  
KDM3A  
AZI1  
AC002117.1  
MLPH  
C1orf116  
POM121  
STRN  
PNN  
FAM81A  
MTMR3  
TRIM25  
SESN2  
HNRNPL  
RP11-552F3.9  
CLCF1  
FGD6  
HSPG2  
FLNA  
NOTCH1  
SULT1C4  
PTPN13  
FAM160A1  
DAPK1  
LRRC14  
RP11-349A22.5  
TNFRSF10D  
FOSL1  
NPC1  
USH1C  
SRF  
MDH1B  
AC005540.3  
LRIG2  
SIN3B  
AC004510.3  
CLIC6  
RP11-69I8.3  
WAPAL  
KAT6B  
BTG3  
NUSAP1  
HSPD1P1  
PNPLA2  
PCNT  
MDM4  
CCDC9  
VPS13B  
MAMLD1  
FRMD4B  
UBC  
N4BP3  
RANGAP1  
PUM1  
ARNT2  
ITPR3  
GOLGA8B  
BIRC3  
TOP1  
SPEF2



RPS27  
FAM166A

Supplementary data of Fig. 3d: gene list used in clustering Fig. 3d

**Clustering of cell specific genes**

|         |                   |        |                              |
|---------|-------------------|--------|------------------------------|
| KRT19   | HPC marker        | VIM    | Hepatic stellate cell marker |
| KRT8    | HPC marker        | PDGFRB | Hepatic stellate cell marker |
| CLDN4   | HPC marker        | APOB   | Hepatic stellate cell marker |
| KRT19   | HPC marker        | PDGFD  | Hepatic stellate cell marker |
| KRT17   | HPC marker        | ACTA2  | Hepatic stellate cell marker |
| TACSTD2 | HPC marker        | ACTG2  | Hepatic stellate cell marker |
| EPCAM   | HPC marker        | COL1A1 | Hepatic stellate cell marker |
| ITGB1   | HPC marker        | COL1A2 | Hepatic stellate cell marker |
| SOX9    | HPC marker        | COL3A1 | Hepatic stellate cell marker |
| DDR1    | HPC marker        | COL4A1 | Hepatic stellate cell marker |
| PROM1   | HPC marker        | LOX    | Hepatic stellate cell marker |
| ID4     | HPC marker        | LOXL1  | Hepatic stellate cell marker |
| TPBG    | HPC marker        | LOXL2  | Hepatic stellate cell marker |
| ABCC4   | HPC marker        | NTM    | Hepatic stellate cell marker |
| ALDH1A2 | HPC marker        | LYVE1  | Endothelial cell marker      |
| HNF1B   | HPC marker        | CLEC4G | Immune cell marker           |
| CYP3A4  | Hepatocyte marker | FCN2   | Immune cell marker           |
| CYP2E1  | Hepatocyte marker | NPL    | Immune cell marker           |
| ALB     | Hepatocyte marker | EMR1   | Immune cell marker           |
| TTR     | Hepatocyte marker | CD68   | Immune cell marker           |
| APOC1   | Hepatocyte marker | PTPRC  | Immune cell marker           |
| B2M     | Hepatocyte marker | CD34   | Immune cell marker           |
| CYP2C9  | Hepatocyte marker | CD59   | Immune cell marker           |
| CYP2C19 | Hepatocyte marker | THY1   | Immune cell marker           |
| UGT2B7  | Hepatocyte marker | CD38   | Immune cell marker           |
| ABCB1   | Hepatocyte marker |        |                              |
| ABCC2   | Hepatocyte marker |        |                              |
| ABCG2   | Hepatocyte marker |        |                              |
| CYP1A1  | Hepatocyte marker |        |                              |
| CYP1A2  | Hepatocyte marker |        |                              |
| HNF4A   | Hepatocyte marker |        |                              |
| HMGCS2  | Hepatocyte marker |        |                              |
| SLC2A2  | Hepatocyte marker |        |                              |

## IPA ingenuity analysis: data used for pathway analysis and upstream regulators

## Genes enriched in EpcAM

| Fold change vs liver | ID               | Symbol      | Entrez Gene Name                                                |
|----------------------|------------------|-------------|-----------------------------------------------------------------|
| 1.158                | ENSG00000107321  | ABCA2       | ATP binding cassette subfamily A member 2                       |
| 1.918                | ENSG00000085563  | ABCB1       | ATP binding cassette subfamily B member 1                       |
| 1.491                | ENSG00000103222  | ABCC1       | ATP binding cassette subfamily C member 1                       |
| 1.482                | ENSG00000124574  | ABCC10      | ATP binding cassette subfamily C member 10                      |
| 1.661                | ENSG00000108846  | ABCC3       | ATP binding cassette subfamily C member 3                       |
| 1.237                | ENSG00000125257  | ABCC4       | ATP binding cassette subfamily C member 4                       |
| 1.23                 | ENSG0000097007   | ABL1        | ABL proto-oncogene 1, non-receptor tyrosine kinase              |
| 1.172                | ENSG00000099204  | ABLIM1      | actin binding LIM protein 1                                     |
| 1.051                | ENSG00000158482  | ABR         | active BCR-related                                              |
| 1.262                | ENSG0000087085   | ACHE        | acetylcholinesterase (Cartwright blood group)                   |
| 1.335                | ENSG00000154930  | ACSS1       | acyl-CoA synthetase short-chain family member 1                 |
| 1.062                | ENSG00000119640  | ACYP1       | acylphosphatase 1                                               |
| 1.184                | ENSG00000137845  | ADAM10      | ADAM metalloproteinase domain 10                                |
| 1.088                | ENSG00000129800  | ADAM28      | ADAM metalloproteinase domain 28                                |
| 1.216                | ENSG00000151651  | ADAM8       | ADAM metalloproteinase domain 8                                 |
| 1.702                | ENSG00000168615  | ADAM9       | ADAM metalloproteinase domain 9                                 |
| 1.689                | ENSG00000105963  | ADAP1       | ArfGAP with dual PH domains 1                                   |
| 1.433                | ENSG00000174233  | ADCY6       | adenylate cyclase 6                                             |
| 1.35                 | ENSG00000155897  | ADCY8       | adenylate cyclase 8                                             |
| 1.564                | ENSG00000205336  | ADGRG1      | adhesion G protein-coupled receptor G1                          |
| 1.794                | ENSG00000148926  | ADM         | adrenomedullin                                                  |
| 1.756                | ENSG00000163485  | ADORA1      | adenosine A1 receptor                                           |
| 1.178                | ENSG00000150594  | ADRA2A      | adrenoreceptor alpha 2A                                         |
| 1.91                 | ENSG00000181026  | AEN         | apoptosis enhancing nuclease                                    |
| 1.306                | ENSG00000195256  | AFAP1       | actin filament associated protein 1                             |
| 2.08                 | ENSG00000130396  | AFDN        | afadin, adherens junction formation factor                      |
| 1.662                | ENSG00000157985  | AGAP1       | ArfGAP with GTPase domain, ankyrin repeat and PH domain 1       |
| 1.036                | ENSG00000204149  | AGAP6 (incl | ArfGAP with GTPase domain, ankyrin repeat and PH domain 5       |
| 1.005                | ENSG00000226652  | AGPAT4      | 1-acylglycerol-3-phosphate O-acyltransferase 4                  |
| 1.883                | ENSG00000106541  | AGR2        | anterior gradient 2, protein disulphide isomerase family member |
| 1.029                | ENSG00000173467  | AGR3        | anterior gradient 3, protein disulphide isomerase family member |
| 1.211                | ENSG00000135541  | AHL1        | Abelson helper integration site 1                               |
| 1.057                | ENSG00000106546  | AHR         | aryl hydrocarbon receptor                                       |
| 1.673                | ENSG00000173209  | AHSA2       | activator of HSP90 ATPase homolog 2                             |
| 1.213                | ENSG00000195681  | AJAP1       | adherens junctions associated protein 1                         |
| 1.22                 | ENSG00000140057  | AK7         | adenylate kinase 7                                              |
| 1.425                | ENSG00000197976  | AKAP17A     | A-kinase anchoring protein 17A                                  |
| 2.02                 | ENSG00000118507  | AKAP7       | A-kinase anchoring protein 7                                    |
| 1.385                | ENSG0000011243   | AKAP8L      | A-kinase anchoring protein 8 like                               |
| 1.708                | ENSG00000128918  | ALDH1A2     | aldehyde dehydrogenase 1 family member A2                       |
| 2.099                | ENSG00000196711  | ALKAL1      | ALK and LTK ligand 1                                            |
| 1.285                | ENSG00000189292  | ALKAL2      | ALK and LTK ligand 2                                            |
| 1.324                | ENSG000002062943 | ALOX12P2    | arachidonate 12-lipoxygenase pseudogene 2                       |
| 1.503                | ENSG00000178038  | ALS2CL      | ALS2 C-terminal like                                            |
| 1.674                | ENSG00000114019  | AMOTL2      | angiomotin like 2                                               |
| 1.548                | ENSG00000204038  | AMY2B       | amylase, alpha 2B (pancreatic)                                  |
| 1.242                | ENSG00000254996  | ANKHD1/AN   | ankyrin repeat and KH domain containing 1                       |
| 1.107                | ENSG00000176915  | ANKLE2      | ankyrin repeat and LEM domain containing 2                      |
| 1.163                | ENSG00000088448  | ANKRD10     | ankyrin repeat domain 10                                        |
| 1.149                | ENSG00000167522  | ANKRD11     | ankyrin repeat domain 11                                        |
| 2.027                | ENSG00000180071  | ANKRD18A    | ankyrin repeat domain 18A                                       |
| 1.334                | ENSG00000203063  | ANKRD18B    | ankyrin repeat domain 18B                                       |
| 2.001                | ENSG00000164236  | ANKRD33B    | ankyrin repeat domain 33B                                       |
| 1.806                | ENSG00000135976  | ANKRD36     | ankyrin repeat domain 36                                        |
| 1.508                | ENSG00000196912  | ANKRD36B    | ankyrin repeat domain 36B                                       |
| 1.223                | ENSG00000137494  | ANKRD42     | ankyrin repeat domain 42                                        |
| 1.052                | ENSG00000163516  | ANKZF-1     | ankyrin repeat and zinc finger domain containing 1              |
| 1.624                | ENSG00000185101  | ANXA9       | annexin 9                                                       |
| 1.171                | ENSG00000122359  | ANXA11      | annexin A11                                                     |
| 2.045                | ENSG00000104537  | ANXA13      | annexin A13                                                     |
| 2.056                | ENSG00000138772  | ANXA3       | annexin A3                                                      |
| 1.66                 | ENSG00000196975  | ANXA4       | annexin A4                                                      |
| 1.17                 | ENSG00000143412  | ANXA9       | annexin A9                                                      |
| 2.077                | ENSG00000213983  | APF1G2      | adaptor related protein complex 1 gamma 2 subunit               |
| 1.969                | ENSG00000129354  | AP1M2       | adaptor related protein complex 1 mu 2 subunit                  |
| 1.318                | ENSG00000154856  | APCD11      | APC down-regulated 1                                            |
| 1.61                 | ENSG00000105290  | APLP1       | amyloid beta precursor like protein 1                           |
| 2.663                | ENSG00000179750  | APOBEC3B    | apolipoprotein B mRNA editing enzyme catalytic subunit 3B       |
| 1.653                | ENSG00000107465  | ARAP2       | ArfGAP with RhoGAP domain, ankyrin repeat and PH domain 2B      |
| 4.291                | ENSG00000109376  | ARC         | activity regulated cytoskeleton associated protein              |
| 3.318                | ENSG00000109321  | AREG        | amphiregulin                                                    |
| 1.344                | ENSG00000134884  | ARGLU1      | arginine and glutamate rich 1                                   |
| 1.283                | ENSG00000138639  | ARHGAP24    | Rho GTPase activating protein 24                                |
| 1.263                | ENSG00000145819  | ARHGAP26    | Rho GTPase activating protein 26                                |
| 2.026                | ENSG00000248405  | ARHGAP8/F   | Rho GTPase activating protein 8                                 |
| 1.565                | ENSG00000130762  | ARHGEF16    | Rho guanine nucleotide exchange factor 16                       |
| 1.058                | ENSG00000142632  | ARHGEF19    | Rho guanine nucleotide exchange factor 19                       |
| 1.454                | ENSG00000236699  | ARHGEF38    | Rho guanine nucleotide exchange factor 38                       |
| 1.406                | ENSG00000165801  | ARHGEF40    | Rho guanine nucleotide exchange factor 40                       |
| 1.171                | ENSG00000050327  | ARHGEF5     | Rho guanine nucleotide exchange factor 5                        |
| 1.588                | ENSG00000150347  | ARID5B      | AT-rich interaction domain 5B                                   |
| 3.468                | ENSG00000179674  | ARL4        | ADP ribosylation factor like GTPase 14                          |
| 1.124                | ENSG00000122644  | ARL4A       | ADP ribosylation factor like GTPase 14A                         |
| 1.746                | ENSG00000188042  | ARL4C       | ADP ribosylation factor like GTPase 4C                          |
| 1.329                | ENSG00000196503  | ARL9        | ADP ribosylation factor like GTPase 9                           |
| 1.654                | ENSG00000135931  | ARMCS9      | armadillo repeat containing 9                                   |
| 1.8                  | ENSG00000173789  | ARN12       | aryl hydrocarbon receptor nuclear translocator 2                |
| 1.146                | ENSG000002029153 | ARNTL2      | aryl hydrocarbon receptor nuclear translocator like 2           |
| 1.823                | ENSG000002050151 | ARPC4-TLL3  | ARPC4-TLL3 readthrough                                          |
| 1.304                | ENSG00000105643  | ARRDC2      | arrestin domain containing 2                                    |
| 1.719                | ENSG00000180801  | ARSI        | arylsulfatase family member J                                   |
| 1.337                | ENSG00000065802  | ASB1        | ankyrin repeat and SOCS box containing 1                        |
| 1.073                | ENSG00000116539  | ASH1L       | ASH1 like histone lysine methyltransferase                      |
| 1.023                | ENSG00000070669  | ASNS        | asparagine synthetase (glutamine-hydrolyzing)                   |
| 1.832                | ENSG00000174939  | ASPHD1      | aspartate beta-hydroxylase domain containing 1                  |
| 1.572                | ENSG00000148219  | ASTN2       | astrotactin 2                                                   |
| 4.237                | ENSG00000162772  | ATF3        | activating transcription factor 3                               |
| 1.063                | ENSG00000068650  | ATP11A      | ATPase phospholipid transporting 11A                            |
| 1.325                | ENSG00000127249  | ATP13A4     | ATPase 13A4                                                     |
| 1.789                | ENSG00000163399  | ATP1A1      | ATPase Na+/K+ transporting subunit alpha 1                      |
| 1.356                | ENSG00000203865  | ATP1A1-AS1  | ATP1A1 antisense RNA 1                                          |
| 1.914                | ENSG00000248819  | ATP5D-PTC1  | ATP5D-PTC1 readthrough                                          |
| 1.256                | ENSG00000054793  | ATP9A       | ATPase phospholipid transporting 9A (putative)                  |
| 1.227                | ENSG00000204842  | ATXN2       | ataxin 2                                                        |
| 1.267                | ENSG00000168488  | ATXN2L      | ataxin 2 like                                                   |
| 1.377                | ENSG00000184809  | B3GALT5     | B3GALT5 antisense RNA 1                                         |
| 1.025                | ENSG00000179913  | B3GNT3      | UDP-GlcNAc:betaGal-beta-1,3-N-acetylglucosaminyltransferase 3   |
| 3.022                | ENSG00000191633  | B4GALT5     | UDP-GlcNAc:betaGal-beta-1,3-N-acetylglucosaminyltransferase 5   |
| 1.236                | ENSG00000156966  | B3GNT7      | UDP-GlcNAc:betaGal-beta-1,3-N-acetylglucosaminyltransferase 7   |
| 1.677                | ENSG00000139004  | B4GALNT3    | beta-1,4-N-acetylgalactosaminyltransferase 3                    |
| 1.177                | ENSG00000158470  | B4GALT5     | beta-1,4-galactosyltransferase 5                                |
| 1.355                | ENSG00000182240  | BACE2       | beta-site APP-cleaving enzyme 2                                 |
| 5.482                | ENSG00000151929  | BAG3        | BCL2 associated athanogene 3                                    |
| 1.245                | ENSG00000006453  | BAP2P1L1    | BAP1 associated protein 2 like 1                                |
| 1.253                | ENSG00000128298  | BAP2P1L2    | BAP1 associated protein 2 like 2                                |
| 2.181                | ENSG00000095739  | BAMBI       | BMP and activin membrane bound inhibitor                        |
| 1.456                | ENSG00000138376  | BARC1       | BRCA1 associated RING domain 1                                  |
| 1.273                | ENSG00000043039  | BARX2       | BARX homeobox 2                                                 |
| 1.716                | ENSG00000198604  | BAZ1A       | bromodomain adjacent to zinc finger domain 1A                   |
| 1.08                 | ENSG00000061008  | BAZ2A       | bromodomain adjacent to zinc finger domain 2A                   |
| 1.101                | ENSG00000123636  | BAZ2B       | bromodomain adjacent to zinc finger domain 2B                   |
| 3.366                | ENSG00000105327  | BBC3        | BCL2 binding component 3                                        |
| 1.531                | ENSG00000050820  | BCAR1       | BCAR1, Cas family scaffolding protein                           |
| 1.629                | ENSG00000142867  | BCL10       | B-cell CLL/lymphoma 10                                          |
| 2.18                 | ENSG00000171791  | BCL2        | BCL2, apoptosis regulator                                       |
| 1.09                 | ENSG00000171552  | BCL2L1      | BCL2 like 1                                                     |
| 1.328                | ENSG00000153094  | BCL2L1L     | BCL2 like 1L                                                    |

## Genes enriched in Trop-2

| Fold change vs liver | ID               | Symbol       | Entrez Gene Name                                                |
|----------------------|------------------|--------------|-----------------------------------------------------------------|
| 1.119                | ENSG00000128274  | AGAL7        | alpha 1,4-galactosyltransferase (P blood group)                 |
| 1.154                | ENSG00000167972  | ABCA3        | ATP binding cassette subfamily A member 3                       |
| 2.304                | ENSG00000085563  | ABCB1        | ATP binding cassette subfamily B member 1                       |
| 1.607                | ENSG00000103222  | ABCC1        | ATP binding cassette subfamily C member 1                       |
| 1.002                | ENSG00000124574  | ABCC10       | ATP binding cassette subfamily C member 10                      |
| 1.516                | ENSG00000108846  | ABCC3        | ATP binding cassette subfamily C member 3                       |
| 1.166                | ENSG00000125257  | ABCC4        | ATP binding cassette subfamily C member 4                       |
| 1.223                | ENSG00000136754  | ABR1         | abi interactors 1                                               |
| 1.413                | ENSG00000097007  | ABL1         | ABL proto-oncogene 1, non-receptor tyrosine kinase              |
| 1.505                | ENSG00000099204  | ABLIM1       | actin binding LIM protein 1                                     |
| 1.124                | ENSG00000158482  | ABR          | active BCR-related                                              |
| 2.516                | ENSG00000166016  | ABTB2        | ankyrin repeat and BTB domain containing 2                      |
| 1.1                  | ENSG00000182827  | ACB3         | acyl-CoA binding domain containing 3                            |
| 1.102                | ENSG00000130234  | ACE2         | angiotensin converting enzyme 2                                 |
| 1.97                 | ENSG00000087085  | ACHE         | acetylcholinesterase (Cartwright blood group)                   |
| 1.539                | ENSG00000213088  | ACKR1        | atypical chemokine receptor 1 (Duffy blood group)               |
| 1.143                | ENSG00000154930  | ACSS1        | acyl-CoA synthetase short-chain family member 1                 |
| 1.077                | ENSG00000119640  | ACYP1        | acylphosphatase 1                                               |
| 1.299                | ENSG00000137845  | ADAM10       | ADAM metalloproteinase domain 10                                |
| 1.349                | ENSG00000151651  | ADAM8        | ADAM metalloproteinase domain 8                                 |
| 2.097                | ENSG00000168615  | ADAM9        | ADAM metalloproteinase domain 9                                 |
| 1.137                | ENSG00000154734  | ADAMT51      | ADAM metalloproteinase with thrombospondin type 1 motif 1       |
| 2.074                | ENSG00000158859  | ADAMT54      | ADAM metalloproteinase with thrombospondin type 1 motif 4       |
| 1.295                | ENSG00000163638  | ADAMT59      | ADAM metalloproteinase with thrombospondin type 1 motif 9       |
| 1.217                | ENSG00000105963  | ADAP1        | ArfGAP with dual PH domains 1                                   |
| 1.347                | ENSG00000174233  | ADCY6        | adenylate cyclase 6                                             |
| 1.192                | ENSG00000155897  | ADCY8        | adenylate cyclase 8                                             |
| 1.046                | ENSG00000153292  | ADGRF1       | adhesion G protein-coupled receptor F1                          |
| 1.832                | ENSG00000205336  | ADGRG1       | adhesion G protein-coupled receptor G1                          |
| 2.228                | ENSG00000148926  | ADM          | adrenomedullin                                                  |
| 1.473                | ENSG00000101544  | ADNP2        | ADNP homeobox 2                                                 |
| 1.139                | ENSG00000163485  | ADORA1       | adenosine A1 receptor                                           |
| 1.062                | ENSG00000170425  | ADORA2B      | adenosine A2b receptor                                          |
| 1.142                | ENSG00000150594  | ADRA2A       | adrenoreceptor alpha 2A                                         |
| 1.153                | ENSG00000184160  | ADRA2C       | adrenoreceptor alpha 2C                                         |
| 1.073                | ENSG00000169252  | ADRB2        | adrenoreceptor beta 2                                           |
| 2.528                | ENSG00000181026  | AEN          | apoptosis enhancing nuclease                                    |
| 1.27                 | ENSG00000195256  | AFAP1        | actin filament associated protein 1                             |
| 1.931                | ENSG00000130396  | AFDN         | afadin, adherens junction formation factor                      |
| 1.147                | ENSG00000198221  | AFDN-AS1     | afadin antisense RNA 1 (head to head)                           |
| 1.642                | ENSG00000157985  | AGAP1        | ArfGAP with GTPase domain, ankyrin repeat and PH domain 1       |
| 1.198                | ENSG00000204149  | AGAP6 (inclu | ArfGAP with GTPase domain, ankyrin repeat and PH domain 5       |
| 1.852                | ENSG00000106541  | AGR2         | anterior gradient 2, protein disulphide isomerase family member |
| 1.079                | ENSG00000135541  | AHL1         | Abelson helper integration site 1                               |
| 1.583                | ENSG00000106546  | AHR          | aryl hydrocarbon receptor                                       |
| 1.096                | ENSG00000105951  | AHSA1        | activator of HSP90 ATPase activity 1                            |
| 1.301                | ENSG00000173209  | AHSA2        | activator of HSP90 ATPase homolog 2                             |
| 2.214                | ENSG00000131016  | AKAP12       | A-kinase anchoring protein 12                                   |
| 1.32                 | ENSG00000170776  | AKAP13       | A-kinase anchoring protein 13                                   |
| 1.544                | ENSG00000197976  | AKAP17A      | A-kinase anchoring protein 17A                                  |
| 1.539                | ENSG00000241978  | AKAP2        | A-kinase anchoring protein 2                                    |
| 1.231                | ENSG00000118507  | AKAP7        | A-kinase anchoring protein 7                                    |
| 1.718                | ENSG0000011243   | AKAP8L       | A-kinase anchoring protein 8 like                               |
| 2.009                | ENSG00000128918  | ALDH1A2      | aldehyde dehydrogenase 1 family member A2                       |
| 1.778                | ENSG00000184254  | ALDH1A3      | aldehyde dehydrogenase 1 family member A3                       |
| 1.509                | ENSG00000196711  | ALKAL1       | ALK and LTK ligand 1                                            |
| 1.371                | ENSG00000202943  | ALOX12P2     | arachidonate 12-lipoxygenase pseudogene 2                       |
| 2.706                | ENSG00000179148  | ALOXK3       | arachidonate lipoxygenase 3                                     |
| 1.948                | ENSG00000178038  | ALS2CL       | ALS2 C-terminal like                                            |
| 1.056                | ENSG00000144233  | AMMECR1L     | AMMECR1 like                                                    |
| 1.468                | ENSG00000166025  | AMOTL1       | angiomotin like 1                                               |
| 3.063                | ENSG00000114019  | AMOTL2       | angiomotin like 2                                               |
| 1.138                | ENSG00000240038  | AMY2B        | amylase, alpha 2B (pancreatic)                                  |
| 1.585                | ENSG000002025496 | ANKHD1/ANK   | ankyrin repeat and KH domain containing 1                       |
| 1.745                | ENSG00000176915  | ANKLE2       | ankyrin repeat and LEM domain containing 2                      |
| 1.089                | ENSG00000088448  | ANKRD10      | ankyrin repeat domain 10                                        |
| 1.115                | ENSG00000167522  | ANKRD11      | ankyrin repeat domain 11                                        |
| 1.109                | ENSG00000101745  | ANKRD12      | ankyrin repeat domain 12                                        |
| 1.666                | ENSG00000180071  | ANKRD18A     | ankyrin repeat domain 18A                                       |
| 1.469                | ENSG00000203063  | ANKRD18B     | ankyrin repeat domain 18B                                       |
| 2.306                | ENSG00000164236  | ANKRD33B     | ankyrin repeat domain 33B                                       |
| 1.89                 | ENSG00000135976  | ANKRD36      | ankyrin repeat domain 36                                        |
| 1.567                | ENSG00000196912  | ANKRD36B     | ankyrin repeat domain 36B                                       |
| 1.273                | ENSG00000137494  | ANKRD42      | ankyrin repeat domain 42                                        |
| 1.519                | ENSG00000185101  | ANXA9        | annexin 9                                                       |
| 1.301                | ENSG00000122359  | ANXA11       | annexin A11                                                     |
| 1.847                | ENSG00000104537  | ANXA13       | annexin A13                                                     |
| 1.372                | ENSG00000182718  | ANXA2        | annexin A2                                                      |
| 1.179                | ENSG00000231991  | ANXA2P2      | annexin A2 pseudogene 2                                         |
| 2.171                | ENSG00000138772  | ANXA3        | annexin A3                                                      |
| 1.243                | ENSG00000196975  | ANXA4        | annexin A4                                                      |
| 1.513                | ENSG00000164111  | ANXA5        | annexin A5                                                      |
| 1.781                | ENSG00000122644  | ARL4         | ADP ribosylation factor like GTPase 14                          |
| 1.776                | ENSG00000129354  | AP1M2        | adaptor related protein complex 1 mu 2 subunit                  |
| 1.411                | ENSG00000152056  | AP1S3        | adaptor related protein complex 1 sigma 3 subunit               |
| 1.071                | ENSG00000254470  | APSB1        | adaptor related protein complex 5 beta 1 subunit                |
| 1.067                | ENSG00000154856  | APCDD1       | APC down-regulated 1                                            |
| 1.048                | ENSG00000105290  | APLP1        | amyloid                                                         |

|       |                  |           |                                                                   |       |                  |              |                                                                                  |
|-------|------------------|-----------|-------------------------------------------------------------------|-------|------------------|--------------|----------------------------------------------------------------------------------|
| 1,588 | ENSG0000010987   | BCL7A     | BCL tumor suppressor 7A                                           | 1,13  | ENSG00000068650  | ATP11A       | ATPase phospholipid transporting 11A                                             |
| 1,303 | ENSG0000013652   | BCYRN1    | brain cytoplasmic RNA 1                                           | 1,287 | ENSG00000133657  | ATP13A3      | ATPase 13A3                                                                      |
| 1,005 | ENSG0000016526   | BEN07     | BEN domain containing 7                                           | 1,42  | ENSG00000127249  | ATP13A4      | ATPase 13A4                                                                      |
| 2,082 | ENSG00000133169  | BEN1      | brain expressed X-linked 1                                        | 1,367 | ENSG00000163399  | ATP1A1       | ATPase Na <sup>+</sup> /K <sup>+</sup> transporting subunit alpha 1              |
| 1,334 | ENSG00000133134  | BEX2      | brain expressed X-linked 2                                        | 1,277 | ENSG00000203865  | ATP1A1-AS1   | ATP1A1 antisense RNA 1                                                           |
| 1,259 | ENSG00000102409  | BEX4      | brain expressed X-linked 4                                        | 1,008 | ENSG00000174437  | ATP2A2       | ATPase sarcoplasmic/endoplasmic reticulum Ca2 <sup>+</sup> transporting 2        |
| 2,7   | ENSG00000123095  | BHLHE41   | basic helix-loop-helix family member 41                           | 1,275 | ENSG00000248919  | ATP5J2-PTCD1 | ATP5J2-PTCD1 readthrough                                                         |
| 1,796 | ENSG00000122870  | BICC1     | Bicc family RNA binding protein 1                                 | 1,386 | ENSG00000054793  | ATP9A        | ATPase phospholipid transporting 9A (putative)                                   |
| 2,292 | ENSG00000162069  | BICD2     | BICD family like cargo adaptor 2                                  | 1,218 | ENSG00000204842  | ATXN2        | ataxin 2                                                                         |
| 2,871 | ENSG00000102090  | BIK       | BCL2 interacting killer                                           | 1,072 | ENSG00000168488  | ATXN2L       | ataxin 2 like                                                                    |
| 2,942 | ENSG00000033445  | BIRC3     | baculoviral IAP repeat containing 3                               | 1,336 | ENSG00000194809  | BGALTS-AS1   | BGALTS antisense RNA 1                                                           |
| 2,786 | ENSG00000125845  | BMP2      | bone morphogenetic protein 2                                      | 1,098 | ENSG00000176022  | BGALT6       | beta-1,3-galactosyltransferase 6                                                 |
| 1,121 | ENSG00000204177  | BMS1P5    | BMS1, ribosome biogenesis factor pseudogene 5                     | 1,06  | ENSG00000170340  | BGNNT2       | UDP-GlcNAc:betaGal beta-1,3-N-acetylglucosaminyltransferase 2                    |
| 1,223 | ENSG00000157764  | BRAF      | B-Raf proto-oncogene, serine/threonine kinase                     | 1,057 | ENSG00000179913  | BGNNT5       | UDP-GlcNAc:betaGal beta-1,3-N-acetylglucosaminyltransferase 5                    |
| 1,084 | ENSG00000100425  | BRD1      | bromodomain containing 1                                          | 3,624 | ENSG00000176597  | BGNNT5       | UDP-GlcNAc:betaGal beta-1,3-N-acetylglucosaminyltransferase 5                    |
| 1,416 | ENSG00000141867  | BRD4      | bromodomain containing 4                                          | 1,209 | ENSG00000156966  | BGNNT7       | UDP-GlcNAc:betaGal beta-1,3-N-acetylglucosaminyltransferase 7                    |
| 1,286 | ENSG00000119411  | BSRFY     | B-box and SPRY domain containing                                  | 1,432 | ENSG00000139044  | BGALTS       | beta-1,4-N-acetyl-galactosaminyltransferase 3                                    |
| 1,208 | ENSG00000133639  | BTG1      | BTG anti-proliferation factor 1                                   | 1,264 | ENSG00000158470  | BGALTS5      | beta-1,4-galactosyltransferase 5                                                 |
| 2,808 | ENSG00000159388  | BTG2      | BTG anti-proliferation factor 2                                   | 1,211 | ENSG00000182240  | BACE2        | beta-site APP-cleaving enzyme 2                                                  |
| 1,434 | ENSG00000154640  | BTG3      | BTG anti-proliferation factor 3                                   | 1,514 | ENSG00000156273  | BACH1        | BTB domain and CNC homolog 1                                                     |
| 1,04  | ENSG00000176236  | C10orf111 | chromosome 10 open reading frame 111                              | 5,877 | ENSG00000151929  | BAG3         | BAG3 associated atahanogen 3                                                     |
| 1,109 | ENSG00000149179  | C11orf49  | chromosome 11 open reading frame 49                               | 1,041 | ENSG00000140320  | BAHD1        | brromo adjacent homology domain containing 1                                     |
| 1,101 | ENSG00000109944  | C11orf63  | chromosome 11 open reading frame 63                               | 1,718 | ENSG00000036453  | BAIP2L1      | BAI1 associated protein 2 like 1                                                 |
| 1,103 | ENSG00000205177  | C11orf91  | chromosome 11 open reading frame 91                               | 1,172 | ENSG00000128298  | BAIP2L2      | BAI1 associated protein 2 like 2                                                 |
| 1,638 | ENSG00000235162  | C12orf75  | chromosome 12 open reading frame 75                               | 2,057 | ENSG00000095739  | BAMBI        | BMP and activin membrane bound inhibitor                                         |
| 1,051 | ENSG00000100557  | C14orf105 | chromosome 14 open reading frame 105                              | 1,418 | ENSG00000138376  | BARD1        | BRCA1 associated RING domain 1                                                   |
| 1,33  | ENSG00000140104  | C14orf79  | chromosome 14 open reading frame 79                               | 1,435 | ENSG00000043039  | BARX2        | BARX homeobox 2                                                                  |
| 1,048 | ENSG00000186073  | C15orf41  | chromosome 15 open reading frame 41                               | 2,167 | ENSG00000198604  | BAZ1A        | bromodomain adjacent to zinc finger domain 1A                                    |
| 2,305 | ENSG00000188549  | C15orf52  | chromosome 15 open reading frame 52                               | 1,147 | ENSG00000175108  | BAZ2A        | bromodomain adjacent to zinc finger domain 2A                                    |
| 1,434 | ENSG00000167644  | C19orf33  | chromosome 19 open reading frame 33                               | 3,098 | ENSG00000105327  | BBC3         | BCL2 binding component 3                                                         |
| 1,041 | ENSG00000105072  | C19orf44  | chromosome 19 open reading frame 44                               | 1,089 | ENSG00000122507  | BBS9         | Bardet-Biedl syndrome 9                                                          |
| 2,491 | ENSG00000163362  | C1orf106  | chromosome 1 open reading frame 106                               | 1,755 | ENSG00000050820  | BCAR1        | BCAR1, Cas family scaffolding protein                                            |
| 2,18  | ENSG00000182795  | C1orf116  | chromosome 1 open reading frame 116                               | 1,214 | ENSG00000064787  | BCAS1        | breast carcinoma amplified sequence 1                                            |
| 1,35  | ENSG00000119280  | C1orf198  | chromosome 1 open reading frame 198                               | 2,665 | ENSG00000142867  | BCL10        | B-cell CLL/lymphoma 10                                                           |
| 1,155 | ENSG00000219553  | C1orf229  | chromosome 1 open reading frame 229                               | 1,797 | ENSG00000171791  | BCL2         | BCL2, apoptosis regulator                                                        |
| 1,646 | ENSG00000131204  | C1QL1     | C1 calcium dependent domain containing 1                          | 1,338 | ENSG00000153904  | BCL2L11      | BCL2 like 11                                                                     |
| 1,969 | ENSG00000205502  | C2CD4B    | C2 calcium dependent domain containing 4B                         | 1,303 | ENSG00000110987  | BCL7A        | BCL tumor suppressor 7A                                                          |
| 1,189 | ENSG00000183186  | C2CD4C    | C2 calcium dependent domain containing 4C                         | 1,09  | ENSG00000186716  | BCR          | BCR, RhoGEF and GTPase activating protein                                        |
| 1,235 | ENSG00000225556  | C2CD4D    | C2 calcium dependent domain containing 4D                         | 1,297 | ENSG00000236824  | BCYRN1       | brain cytoplasmic RNA 1                                                          |
| 3,777 | ENSG00000114529  | C3orf52   | chromosome 3 open reading frame 52                                | 1,087 | ENSG00000100739  | BDRB1        | bradykinin receptor B1                                                           |
| 1,17  | ENSG00000181744  | C3orf58   | chromosome 3 open reading frame 58                                | 1,34  | ENSG00000165626  | BEN07        | BEN domain containing 7                                                          |
| 1,032 | ENSG00000205129  | C4orf47   | chromosome 4 open reading frame 47                                | 1,91  | ENSG00000123169  | BEX1         | brain expressed X-linked 1                                                       |
| 1,03  | ENSG00000197603  | C5orf42   | chromosome 5 open reading frame 42                                | 1,012 | ENSG00000133134  | BEX2         | brain expressed X-linked 2                                                       |
| 1,138 | ENSG00000178776  | C5orf46   | chromosome 5 open reading frame 46                                | 1,133 | ENSG00000102409  | BEX4         | brain expressed X-linked 4                                                       |
| 1,054 | ENSG00000188112  | C6orf132  | chromosome 6 open reading frame 132                               | 2,855 | ENSG00000123095  | BHLHE41      | basic helix-loop-helix family member 41                                          |
| 3,28  | ENSG00000197261  | C6orf141  | chromosome 6 open reading frame 141                               | 1,619 | ENSG00000122870  | BICC1        | Bicc family RNA binding protein 1                                                |
| 1,607 | ENSG00000189325  | C6orf222  | chromosome 6 open reading frame 222                               | 2,187 | ENSG00000162069  | BICD2        | BICD family like cargo adaptor 2                                                 |
| 1,243 | ENSG0000013744   | C6orf52   | chromosome 6 open reading frame 52                                | 2,927 | ENSG00000102090  | BIK          | BCL2 interacting killer                                                          |
| 1,623 | ENSG00000176907  | C8orf4    | chromosome 8 open reading frame 4                                 | 3,440 | ENSG00000224445  | BIRC3        | baculoviral IAP repeat containing 3                                              |
| 1,714 | ENSG00000160345  | C9orf116  | chromosome 9 open reading frame 116                               | 2,852 | ENSG00000125845  | BMP2         | bone morphogenetic protein 2                                                     |
| 1,306 | ENSG000002004352 | C9orf129  | chromosome 9 open reading frame 129                               | 1,545 | ENSG00000157764  | BRAF         | B-Raf proto-oncogene, serine/threonine kinase                                    |
| 2,169 | ENSG00000164879  | CA3       | carbonic anhydrase 3                                              | 1,355 | ENSG00000100425  | BRD1         | bromodomain containing 1                                                         |
| 2,058 | ENSG00000107159  | CA9       | carbonic anhydrase 9                                              | 1,473 | ENSG00000141867  | BRD4         | bromodomain containing 4                                                         |
| 1,47  | ENSG00000116161  | CACYPB    | calyculin binding protein                                         | 1,185 | ENSG00000190670  | BRP3         | bromodomain and PHD finger containing 3                                          |
| 1,096 | ENSG00000084774  | CAD       | carbamoyl-phosphate synthetase 2, aspartate transcarbamylase, and | 1,153 | ENSG00000119411  | BSRFY        | B-box and SPRY domain containing                                                 |
| 1,143 | ENSG000002007419 | CAHM      | colon adenocarcinoma hypermethylated (non-protein coding)         | 1,213 | ENSG00000133639  | BTG1         | BTG anti-proliferation factor 1                                                  |
| 1,504 | ENSG00000130559  | CAMSAP1   | calmodulin regulated spectrin associated protein 1                | 2,471 | ENSG00000159388  | BTG2         | BTG anti-proliferation factor 2                                                  |
| 1,258 | ENSG00000076826  | CAMSAP3   | calmodulin regulated spectrin associated protein family member 3  | 1,777 | ENSG00000154640  | BTG3         | BTG anti-proliferation factor 3                                                  |
| 1,167 | ENSG00000108509  | CAMTA2    | calmodulin binding transcription activator 2                      | 1,78  | ENSG00000109944  | C11orf63     | chromosome 11 open reading frame 63                                              |
| 1,119 | ENSG00000042493  | CAP6      | capsing actin protein, gelsolin like                              | 1,453 | ENSG00000175573  | C11orf68     | chromosome 11 open reading frame 68                                              |
| 1,333 | ENSG00000182472  | CAPN12    | calpain 12                                                        | 1,711 | ENSG00000105317  | C11orf91     | chromosome 11 open reading frame 91                                              |
| 1,114 | ENSG00000162909  | CAPN2     | calpain 2                                                         | 1,496 | ENSG00000235162  | C12orf75     | chromosome 12 open reading frame 75                                              |
| 1,383 | ENSG00000077274  | CAPN6     | calpain 6                                                         | 1,295 | ENSG00000140104  | C14orf79     | chromosome 14 open reading frame 79                                              |
| 1,669 | ENSG00000105519  | CAPS      | calcyphosine                                                      | 2,195 | ENSG00000188549  | C15orf52     | chromosome 15 open reading frame 52                                              |
| 1,097 | ENSG00000100065  | CARD10    | caspace recruitment domain family member 10                       | 1,25  | ENSG00000182831  | C16orf72     | chromosome 16 open reading frame 72                                              |
| 1,497 | ENSG00000098628  | CASR      | calcium sensing receptor                                          | 1,562 | ENSG00000167644  | C19orf33     | chromosome 19 open reading frame 33                                              |
| 2,287 | ENSG00000130940  | CASZ1     | castor zinc finger 1                                              | 1,007 | ENSG00000105072  | C19orf44     | chromosome 19 open reading frame 44                                              |
| 1,025 | ENSG00000078699  | CBFA2T2   | CBFA2/RUNX1 transcription partner 2                               | 3,198 | ENSG00000163362  | C1orf106     | chromosome 1 open reading frame 106                                              |
| 1,631 | ENSG00000141582  | CBX4      | chromobox 4                                                       | 3,401 | ENSG00000182795  | C1orf116     | chromosome 1 open reading frame 116                                              |
| 1,532 | ENSG00000183741  | CBX6      | chromobox 6                                                       | 1,003 | ENSG00000163263  | C1orf189     | chromosome 1 open reading frame 189                                              |
| 1,04  | ENSG00000158941  | CCAR2     | cell cycle and apoptosis regulator 2                              | 1,596 | ENSG00000119280  | C1orf198     | chromosome 1 open reading frame 198                                              |
| 1,226 | ENSG00000135736  | CDC102A   | coiled-coil domain containing 102A                                | 1,02  | ENSG00000131094  | C1QL1        | complement C1q like 1                                                            |
| 1,377 | ENSG00000167131  | CDC103    | coiled-coil domain containing 103                                 | 1,103 | ENSG00000108535  | C2CD4A       | C2 calcium dependent domain containing 4A                                        |
| 1,38  | ENSG00000151773  | CDC102    | coiled-coil domain containing 102                                 | 3,362 | ENSG00000205502  | C2CD4B       | C2 calcium dependent domain containing 4B                                        |
| 1,171 | ENSG00000174555  | CDC104    | coiled-coil domain containing 104                                 | 1,215 | ENSG00000225556  | C2CD4D       | C2 calcium dependent domain containing 4D                                        |
| 1,84  | ENSG00000163492  | CDC141    | coiled-coil domain containing 141                                 | 4,965 | ENSG00000114529  | C3orf52      | chromosome 3 open reading frame 52                                               |
| 1,126 | ENSG00000153237  | CDC148    | coiled-coil domain containing 148                                 | 1,271 | ENSG00000181744  | C3orf58      | chromosome 3 open reading frame 58                                               |
| 1,05  | ENSG00000165813  | CDC186    | coiled-coil domain containing 186                                 | 1,324 | ENSG00000178776  | C5orf46      | chromosome 5 open reading frame 46                                               |
| 1,547 | ENSG00000196118  | CDC189    | coiled-coil domain containing 189                                 | 1,159 | ENSG00000188112  | C6orf132     | chromosome 6 open reading frame 132                                              |
| 1,59  | ENSG00000159214  | CDC24     | coiled-coil domain containing 24                                  | 4,776 | ENSG00000107261  | C6orf141     | chromosome 6 open reading frame 141                                              |
| 1,329 | ENSG00000160050  | CDC28B    | coiled-coil domain containing 28B                                 | 1,873 | ENSG00000189325  | C6orf222     | chromosome 6 open reading frame 222                                              |
| 1,595 | ENSG00000152076  | CDC74B    | coiled-coil domain containing 74B                                 | 1,403 | ENSG00000176907  | C8orf4       | chromosome 8 open reading frame 4                                                |
| 1,122 | ENSG00000105321  | CDC9      | coiled-coil domain containing 9                                   | 1,089 | ENSG00000160345  | C9orf116     | chromosome 9 open reading frame 116                                              |
| 2,586 | ENSG00000108691  | CC12      | C-C motif chemokine ligand 2                                      | 1,362 | ENSG000002004352 | C9orf129     | chromosome 9 open reading frame 129                                              |
| 3,477 | ENSG00000115009  | CC120     | C-C motif chemokine ligand 20                                     | 1,019 | ENSG00000185015  | CA13         | carbonic anhydrase 13                                                            |
| 1,446 | ENSG00000151862  | CC128     | C-C motif chemokine ligand 28                                     | 1,855 | ENSG00000164879  | CA3          | carbonic anhydrase 3                                                             |
| 2,01  | ENSG00000163660  | CCL1      | cyclin L1                                                         | 1,999 | ENSG00000107159  | CA9          | carbonic anhydrase 9                                                             |
| 1,23  | ENSG00000221978  | CCL2      | cyclin L2                                                         | 1,555 | ENSG00000116161  | CACYPB       | calyculin binding protein                                                        |
| 2,679 | ENSG00000126353  | CCR7      | C-C motif chemokine receptor 7                                    | 1,207 | ENSG00000084774  | CAD          | carbamoyl-phosphate synthetase 2, aspartate transcarbamylase, and dihydroorotase |
| 1,124 | ENSG00000117877  | CD3EAP    | CD3e molecule associated protein                                  | 1,504 | ENSG00000130559  | CAMSAP1      | calmodulin regulated spectrin associated protein 1                               |
| 2,615 | ENSG00000121449  | CD83      | CD83 molecule                                                     | 1,33  | ENSG00000076826  | CAMSAP3      | calmodulin regulated spectrin associated protein family member 3                 |
| 1,237 | ENSG00000198572  | CDC42BPB  | CDC42 binding protein kinase beta                                 | 1,167 | ENSG00000130483  | CAP6         | capsing actin protein, gelsolin like                                             |
| 1,042 | ENSG00000171219  | CDC42BPB  | CDC42 binding protein kinase gamma                                | 1,116 | ENSG00000182472  | CAPN12       | calpain 12                                                                       |
| 1,138 | ENSG00000128283  | CDC42EP1  | CDC42 effector protein 1                                          | 1,297 | ENSG00000162909  | CAPN2        | calpain 2                                                                        |
| 1,297 | ENSG00000179604  | CDC42EP4  | CDC42 effector protein 4                                          | 1,247 | ENSG00000077274  | CAPN6        | calpain 6                                                                        |
| 2,241 | ENSG00000163814  | CDP1      | CUB domain containing protein 1                                   | 1,127 | ENSG00000203697  | CAPN8        | calpain 8                                                                        |
| 2,025 | ENSG00000199068  | CDH1      | cadherin 1                                                        | 1,286 | ENSG00000100065  | CARD10       | caspace recruitment domain family member 10                                      |
| 2,265 | ENSG00000113361  | CDH6      | cadherin 6                                                        | 1,526 | ENSG00000123357  | CARD6        | caspace recruitment domain family member 6                                       |
| 1,073 | ENSG000000008128 | CDK11A    | cyclin dependent kinase 11A                                       | 2,518 | ENSG00000130940  | CASZ1        | castor zinc finger 1                                                             |
| 1,243 | ENSG00000156345  | CDK20     | cyclin dependent kinase 20                                        | 1,634 | ENSG00000105974  | CAV1         | caveolin 1                                                                       |
| 1,639 | ENSG00000124762  | CDKN1A    | cyclin dependent kinase inhibitor 1A                              | 1,16  | ENSG00000114423  | CLB8         | Cbl proto-oncogene B                                                             |
| 1,556 | ENSG00000129757  | CDKN1C    | cyclin dependent kinase inhibitor 1C                              | 1,459 | ENSG00000141582  | CBX4         | chromobox 4                                                                      |
| 1,221 | ENSG00000168564  | CDKN2AIP  | CDKN2A interacting protein                                        | 1,408 | ENSG00000183741  | CBX6         | chromobox 6                                                                      |
| 2,418 | ENSG00000147883  | CDKN2B    | cyclin dependent kinase inhibitor 2B                              | 1,357 | ENSG00000158941  | CCAR2        | cell cycle and apoptosis regulator 2                                             |
| 1,001 | ENSG00000109089  | CDRL2     | cerebellar degeneration related protein 2 like                    | 1,079 | ENSG00000135736  | CDC102A      | coiled-coil domain containing 102A                                               |
| 1,655 | ENSG00000163624  | CD51      | CDP-diacylglycerol synthase 1                                     | 1,04  | ENSG00000151773  | CDC102       | coiled-coil domain containing 102                                                |

|       |                  |           |                                                                  |       |                 |              |                                                                                       |
|-------|------------------|-----------|------------------------------------------------------------------|-------|-----------------|--------------|---------------------------------------------------------------------------------------|
| 1,929 | ENSG00000134873  | CLDN10    | claudin 10                                                       | 1,21  | ENSG00000129757 | CDKN1C       | cyclin dependent kinase inhibitor 1C                                                  |
| 1,183 | ENSG00000253958  | CLDN23    | claudin 23                                                       | 1,421 | ENSG00000168564 | CDKN2AIP     | CDKN2A interacting protein                                                            |
| 1,207 | ENSG00000184697  | CLDN6     | claudin 6                                                        | 3,042 | ENSG00000147883 | CDKN2B       | cyclin dependent kinase inhibitor 2B                                                  |
| 1,154 | ENSG00000181885  | CLDN7     | claudin 7                                                        | 1,317 | ENSG00000140743 | CDNF         | cerebellar degeneration related protein 2                                             |
| 2,465 | ENSG00000213937  | CLDN9     | claudin 9                                                        | 1,052 | ENSG00000109089 | CDRL2        | cerebellar degeneration related protein 2 like                                        |
| 1,007 | ENSG00000008532  | CLEC16A   | C-type lectin domain containing 16A                              | 1,583 | ENSG00000163624 | CD51         | CDP-diacylglycerol synthase 1                                                         |
| 1,945 | ENSG00000159212  | CLIC6     | chloride intracellular channel 6                                 | 1,367 | ENSG00000091527 | CDV3         | CDV3 homolog                                                                          |
| 1,047 | ENSG00000112822  | CLINT1    | clathrin interactor 1                                            | 1,01  | ENSG00000166446 | CDYL2        | chromodomain Y like 2                                                                 |
| 2,27  | ENSG0000013441   | CLK1      | CLK like kinase 1                                                | 2,54  | ENSG00000086548 | CEACAM6      | carcinoembryonic antigen related cell adhesion molecule 6                             |
| 1,543 | ENSG00000153551  | CMTM7     | CKLF like MARVEL transmembrane domain containing 7               | 1,429 | ENSG00000102901 | CENPF        | centromere protein 1                                                                  |
| 2,203 | ENSG00000105427  | CNFN      | cornifelin                                                       | 1,457 | ENSG00000153075 | CFAP221      | cilia and flagella associated protein 221                                             |
| 1,624 | ENSG00000142675  | CNKR1     | connector enhancer of kinase suppressor of Ras 1                 | 1,573 | ENSG00000003402 | CFAR         | CASP8 and FADD like apoptosis regulator                                               |
| 1,593 | ENSG00000158158  | CNNM4     | cyclin and CBS domain divalent metal cation transport mediator 4 | 2,247 | ENSG00000226312 | CFAR-AS1     | CFAR antisense RNA 1                                                                  |
| 1,058 | ENSG00000080802  | CNOT4     | CCR4-NOT transcription complex subunit 4                         | 2,449 | ENSG00000001626 | CFR          | cystic fibrosis transmembrane conductance regulator                                   |
| 1,246 | ENSG00000170037  | CNTROB    | centriolin, centriole duplication and spindle assembly protein   | 1,238 | ENSG00000143375 | CGN          | cingulin                                                                              |
| 1,339 | ENSG00000106078  | CNTN1     | connorin-like WH2 repeat protein                                 | 1,14  | ENSG00000153922 | CHD1         | chromodomain helicase DNA binding protein 1                                           |
| 1,819 | ENSG00000196739  | COL27A1   | collagen type XXVII alpha 1 chain                                | 2,569 | ENSG00000173575 | CHD2         | chromodomain helicase DNA binding protein 2                                           |
| 1,473 | ENSG00000134871  | COL4A2    | collagen type IV alpha 2 chain                                   | 1,554 | ENSG00000170004 | CHD3         | chromodomain helicase DNA binding protein 3                                           |
| 2,175 | ENSG00000049089  | COL9A2    | collagen type IX alpha 2 chain                                   | 1,069 | ENSG00000111642 | CHD4         | chromodomain helicase DNA binding protein 4                                           |
| 1,53  | ENSG00000214290  | COLCA2    | colorectal cancer associated 2                                   | 1,092 | ENSG00000109220 | CHIC2        | cysteine rich hydrophobic domain 2                                                    |
| 1,108 | ENSG00000135678  | CPM       | carboxypeptidase M                                               | 1,981 | ENSG00000110721 | CHKA         | choline kinase alpha                                                                  |
| 2,099 | ENSG00000205560  | CPT1B     | carmitine palmitoyltransferase 1B                                | 1,016 | ENSG00000203668 | CHML         | CHM like, Rab escort protein 2                                                        |
| 1,817 | ENSG00000177685  | CRACK2B   | calcium release activated channel regulator 2B                   | 1,768 | ENSG00000101421 | CNHP4B       | charged multivesicular body protein 4B                                                |
| 3,085 | ENSG00000146592  | CREB5     | cAMP responsive element binding protein 5                        | 2,274 | ENSG00000110172 | CHORDC1      | cysteine and histidine rich domain containing 1                                       |
| 1,16  | ENSG00000000539  | CREBBP    | CREB binding protein                                             | 1,305 | ENSG00000133019 | CHRM3        | cholinergic receptor muscarinic 3                                                     |
| 1,095 | ENSG00000005853  | CROCC     | ciliary rootlet coiled-coil, rootletin                           | 1,437 | ENSG00000122863 | CHST3        | carbohydrate sulfotransferase 3                                                       |
| 1,367 | ENSG000000095713 | CRTAC1    | cartilage acidic protein 1                                       | 1,048 | ENSG00000140835 | CHST4        | carbohydrate sulfotransferase 4                                                       |
| 1,397 | ENSG00000008045  | CRY1      | cryptochrome circadian clock 1                                   | 1,346 | ENSG00000127586 | CHTF18       | chromosome transmission fidelity factor 18                                            |
| 1,46  | ENSG00000104371  | CSF1      | colony stimulating factor 1                                      | 1,007 | ENSG00000135425 | CIB2         | calcium and integrin binding family member 2                                          |
| 2,293 | ENSG00000108342  | CSF3      | colony stimulating factor 3                                      | 1,2   | ENSG00000179862 | CITED4       | C/EBP-beta interacting transcription factor with Glu/Asp rich carboxy-terminal domain |
| 1,277 | ENSG00000104218  | CSP1      | centrosome and spindle pole associated protein 1                 | 1,11  | ENSG00000166165 | CKB          | creatine kinase B                                                                     |
| 3,026 | ENSG00000144655  | CSRNP1    | cysteine and serine rich nuclear protein 1                       | 1,504 | ENSG00000131730 | CKMT2        | creatine kinase, mitochondrial                                                        |
| 1,647 | ENSG00000170373  | CST1      | cystatin SN                                                      | 1,101 | ENSG00000104859 | CLASRP       | CLK4 associating serine/arginine rich protein                                         |
| 2,02  | ENSG00000118523  | CTGF      | connective tissue growth factor                                  | 3,585 | ENSG00000175505 | CLCF1        | cardiostrophin like cytokine family factor 1                                          |
| 1,01  | ENSG00000044115  | CTNNA1    | catenin alpha 1                                                  | 1,074 | ENSG00000114859 | CLCN2        | chloride voltage-gated channel 2                                                      |
| 1,318 | ENSG00000139561  | CTNND1    | catenin delta 1                                                  | 2,211 | ENSG00000153347 | CLDN1        | claudin 1                                                                             |
| 2,439 | ENSG00000169862  | CTNND2    | catenin delta 2                                                  | 1,503 | ENSG00000134873 | CLDN10       | claudin 10                                                                            |
| 1,375 | ENSG00000077063  | CTTNBP2   | coractin binding protein 2                                       | 1,451 | ENSG00000253958 | CLDN23       | claudin 23                                                                            |
| 1,024 | ENSG00000178531  | CTXN1     | cortexin 1                                                       | 1,837 | ENSG00000184697 | CLDN6        | claudin 6                                                                             |
| 1,692 | ENSG00000180891  | CUEDC1    | CUE domain containing 1                                          | 1,129 | ENSG00000181885 | CLDN7        | claudin 7                                                                             |
| 1,4   | ENSG00000004890  | CUL7      | culin 7                                                          | 2,319 | ENSG00000212937 | CLDN9        | claudin 9                                                                             |
| 2,101 | ENSG00000006310  | CXCL1     | C-X3-C motif chemokine ligand 1                                  | 2,940 | ENSG00000159312 | CUC5         | chloride intracellular channel 6                                                      |
| 4,043 | ENSG00000163739  | CXCL1     | C-X-C motif chemokine ligand 1                                   | 1,174 | ENSG00000113282 | CLINT1       | clathrin interactor 1                                                                 |
| 3,846 | ENSG000000081041 | CXCL2     | C-X-C motif chemokine ligand 2                                   | 2,264 | ENSG0000013441  | CLK1         | CDC like kinase 1                                                                     |
| 4,81  | ENSG00000163734  | CXCL3     | C-X-C motif chemokine ligand 3                                   | 1,117 | ENSG00000179335 | CLK3         | CDC like kinase 3                                                                     |
| 2,604 | ENSG00000163735  | CXCL5     | C-X-C motif chemokine ligand 5                                   | 1,259 | ENSG00000183723 | CMTM4        | CKLF like MARVEL transmembrane domain containing 4                                    |
| 2,487 | ENSG00000124875  | CXCL6     | C-X-C motif chemokine ligand 6                                   | 1,418 | ENSG00000153551 | CMTM7        | CKLF like MARVEL transmembrane domain containing 7                                    |
| 1,35  | ENSG00000169429  | CXCL8     | C-X-C motif chemokine ligand 8                                   | 1,362 | ENSG00000105427 | CNFN         | cornifelin                                                                            |
| 1,073 | ENSG000000008283 | CVS61     | cytochrome b561                                                  | 1,504 | ENSG00000142675 | CNKR1        | connector enhancer of kinase suppressor of Ras 1                                      |
| 1,245 | ENSG00000235700  | CYCSP2    | cytochrome c, somatic pseudogene 52                              | 1,18  | ENSG00000153721 | CNKR3        | CNKR3 family member 3                                                                 |
| 3,026 | ENSG00000142871  | CYR61     | cysteine rich angiogenic inducer 61                              | 1,884 | ENSG00000158158 | CNNM4        | cyclin and CBS domain divalent metal cation transport mediator 4                      |
| 1,342 | ENSG00000205795  | CYS1      | cystin 1                                                         | 1,464 | ENSG00000080802 | CNOT4        | CCR4-NOT transcription complex subunit 4                                              |
| 1,521 | ENSG00000105443  | CYTH2     | cytohesin 2                                                      | 1,098 | ENSG00000113300 | CNOT6        | CCR4-NOT transcription complex subunit 6                                              |
| 1,24  | ENSG00000212204  | CYTOR     | cytoskeleton regulator RNA                                       | 1,54  | ENSG00000105078 | COB          | cardiac troponin WH2 repeat protein                                                   |
| 1,14  | ENSG00000134780  | DAGA      | diacylglycerol lipase alpha                                      | 1,699 | ENSG00000196739 | COL27A1      | collagen type XXVII alpha 1 chain                                                     |
| 1,404 | ENSG00000178149  | DALR3     | DALR anticodon binding domain containing 3                       | 1,728 | ENSG00000187498 | COL4A1       | collagen type IV alpha 1 chain                                                        |
| 1,385 | ENSG00000196730  | DAPK1     | death associated protein kinase 1                                | 1,811 | ENSG00000134871 | COL4A2       | collagen type IV alpha 2 chain                                                        |
| 1,802 | ENSG00000167657  | DAPK3     | death associated protein kinase 3                                | 2,139 | ENSG00000049089 | COL9A2       | collagen type IX alpha 2 chain                                                        |
| 1,753 | ENSG00000113758  | DBN1      | drebrin 1                                                        | 1,534 | ENSG00000214290 | COLCA2       | colorectal cancer associated 2                                                        |
| 1,086 | ENSG00000003249  | DBND1     | dysbindin domain containing 1                                    | 1,005 | ENSG00000144524 | COPF5B       | COP9 signalosome subunit 7B                                                           |
| 2,168 | ENSG00000146038  | DCC2      | doublecortin domain containing 2                                 | 1,868 | ENSG00000108880 | CDK1C        | core histone H2                                                                       |
| 1,011 | ENSG00000215301  | DDX3X     | DEAD-box helicase 3, X-linked                                    | 1,463 | ENSG00000137449 | CEP82        | cytoplasmic polyadenylation element binding protein 2                                 |
| 1,122 | ENSG00000185163  | DDX51     | DEAD-box helicase 51                                             | 1,206 | ENSG00000135678 | CPM          | carboxypeptidase M                                                                    |
| 2,309 | ENSG00000160570  | DEDD2     | death effector domain containing 2                               | 1,797 | ENSG00000205560 | CPT1B        | carmitine palmitoyltransferase 1B                                                     |
| 2,015 | ENSG00000203970  | DEFB110   | defensin beta 110                                                | 1,968 | ENSG00000143320 | CRABP2       | cellular retinoic acid binding protein 2                                              |
| 1,324 | ENSG00000168350  | DEGS2     | delta 4-desaturase, sphingolipid 2                               | 1,908 | ENSG00000177685 | CRACK2B      | calcium release activated channel regulator 2B                                        |
| 1,098 | ENSG00000003549  | DEPDC1B   | DEP domain containing 1B                                         | 1,032 | ENSG00000107545 | CNRM1        | cramped chromatin regulator homolog 1                                                 |
| 1,059 | ENSG00000109066  | DHXL15    | DEAH-box helicase 15                                             | 3,955 | ENSG00000146592 | CREB5        | cAMP responsive element binding protein 5                                             |
| 1,153 | ENSG00000134815  | DHX34     | DEH-box helicase 34                                              | 1,567 | ENSG00000095713 | CRTAC1       | cartilage acidic protein 1                                                            |
| 1,275 | ENSG00000135829  | DHX9      | DEH-box helicase 9                                               | 1,047 | ENSG00000160741 | CRTC2        | CREB regulated transcription coactivator 2                                            |
| 1,02  | ENSG00000101191  | DIDO1     | death inducer-obliterator 1                                      | 2,325 | ENSG00000008045 | CRY1         | cryptochrome circadian clock 1                                                        |
| 1,487 | ENSG00000165023  | DIRAS2    | DIRAS family GTPase 2                                            | 2,049 | ENSG00000184371 | CSF1         | colony stimulating factor 1                                                           |
| 1,059 | ENSG00000144535  | DIS3L2    | DIS3 like 3'-5' exonuclease 2                                    | 1,997 | ENSG00000154400 | CSF2         | colony stimulating factor 2                                                           |
| 1,072 | ENSG00000151208  | DLG5      | discs large MAGUK scaffold protein 5                             | 4,365 | ENSG00000108342 | CSF3         | colony stimulating factor 3                                                           |
| 1,024 | ENSG00000170579  | DLGAP1    | DLG associated protein 1                                         | 1,175 | ENSG00000141551 | CNKN1D       | casein kinase 1 delta                                                                 |
| 1,112 | ENSG00000100206  | DMC1      | DNA meiotic recombinase 1                                        | 1,129 | ENSG00000213923 | CNKN1E       | casein kinase 1 epsilon                                                               |
| 1,269 | ENSG00000161249  | DMKN      | dermokin                                                         | 3,191 | ENSG00000144655 | CSRNP1       | cysteine and serine rich nuclear protein 1                                            |
| 1,045 | ENSG00000185800  | DMWD      | dystrophia myotonica, WD repeat containing                       | 2,127 | ENSG00000170373 | CST1         | cystatin SN                                                                           |
| 1,503 | ENSG00000215661  | DNAAP     | deinamin neuronal assembly factor 4                              | 1,054 | ENSG00000175029 | CTBP2        | C-terminal binding protein 2                                                          |
| 2,467 | ENSG000000080661 | DNAJB1    | DnaJ heat shock protein family (Hsp40) member A1                 | 2,046 | ENSG00000118523 | CTGF         | connective tissue growth factor                                                       |
| 3,069 | ENSG00000140403  | DNAJB4    | DnaJ heat shock protein family (Hsp40) member A4                 | 1,402 | ENSG00000044115 | CTNNA1       | catenin alpha 1                                                                       |
| 5,728 | ENSG00000132002  | DNAJB8    | DnaJ heat shock protein family (Hsp40) member B1                 | 1,501 | ENSG00000119326 | CTNNA1L      | catenin alpha like 1                                                                  |
| 4,088 | ENSG00000216216  | DNAJB8A   | DnaJ heat shock protein family (Hsp40) member B4                 | 1,614 | ENSG00000198561 | CTNND1       | catenin delta 1                                                                       |
| 1,807 | ENSG00000244115  | DNAJC25-G | DNAJC25-NG10 readthrough                                         | 2,393 | ENSG00000169862 | CTNND2       | catenin delta 2                                                                       |
| 1,032 | ENSG00000106978  | DNM1      | dynamins 1                                                       | 1,231 | ENSG00000077863 | CTTNBP2      | coractin binding protein 2                                                            |
| 1,133 | ENSG00000107554  | DNAH9     | dynamitin binding protein                                        | 1,265 | ENSG00000143079 | CTTNBP2NL    | CTTNBP2 N-terminal like                                                               |
| 1,241 | ENSG00000147459  | DOCK5     | dedicator of cytokinesis 5                                       | 1,629 | ENSG00000180891 | CUEDC1       | CUE domain containing 1                                                               |
| 1,011 | ENSG00000129932  | DOHH      | deoxyhypusine hydroxylase                                        | 1,034 | ENSG00000036257 | CUL3         | culin 3                                                                               |
| 1,187 | ENSG00000175920  | DOX7      | docking protein 7                                                | 1,126 | ENSG00000044090 | CUL7         | culin 7                                                                               |
| 1,675 | ENSG00000104885  | DOT1L     | DOT1 like histone lysine methyltransferase                       | 2,187 | ENSG00000006210 | CXCL1        | C-X3-C motif chemokine ligand 1                                                       |
| 1,061 | ENSG00000166171  | DPDC      | deleted in primary ciliary dyskinesia homolog (mouse)            | 4,118 | ENSG00000163739 | CXCL1        | C-X-C motif chemokine ligand 1                                                        |
| 1,171 | ENSG00000179862  | DNK3      | dynamitin regulatory complex subunit 3                           | 1,847 | ENSG00000108342 | CXCL2        | C-X-C motif chemokine ligand 2                                                        |
| 1,658 | ENSG00000134755  | DSCC2     | desmocollin 2                                                    | 4,703 | ENSG00000163734 | CXCL3        | C-X-C motif chemokine ligand 3                                                        |
| 1,084 | ENSG00000134762  | DSCC3     | desmocollin 3                                                    | 2,529 | ENSG00000163735 | CXCL5        | C-X-C motif chemokine ligand 5                                                        |
| 1,786 | ENSG00000046604  | DSG2      | desmoglein 2                                                     | 2,4   | ENSG00000124875 | CXCL6        | C-X-C motif chemokine ligand 6                                                        |
| 1,873 | ENSG00000096966  | DSP       | desmoplakin                                                      | 3,92  | ENSG00000169429 | CXCL8        | C-X-C motif chemokine ligand 8                                                        |
| 1,209 | ENSG00000091073  | DTX2      | deTEx E3 ubiquitin ligase 2                                      | 1,039 | ENSG00000008283 | CVS61        | cytochrome b561                                                                       |
| 1,286 | ENSG00000178498  | DTX3      | deTEx E3 ubiquitin ligase 3                                      | 1,767 | ENSG00000037998 | CYLD         | CYLD lysine 63 deubiquitinase                                                         |
| 1,288 | ENSG00000140279  | DUOX2     | dual oxidase 2                                                   | 3,612 | ENSG00000142871 | CYR61        | cysteine rich angiogenic inducer 61                                                   |
| 1,813 | ENSG00000140274  | DUOX2A2   | dual oxidase maturation factor 2                                 | 1,368 | ENSG00000205795 | CYS1         | cystin 1                                                                              |
| 2,567 | ENSG00000120129  | DUSP1     | dual specificity phosphatase 1                                   | 1,74  | ENSG00000105443 | CYTH2        | cytohesin 2                                                                           |
| 1,721 | ENSG00000143507  | DUSP10    | dual specificity phosphatase 10                                  | 1,614 | ENSG00000212204 | CYTOR        | cytoskeleton regulator RNA                                                            |
| 1,058 | ENSG00000111266  | DUSP16    | dual specificity phosphatase 16                                  | 1,142 | ENSG00000136848 | DAB2IP       | DAB2 interacting protein                                                              |
| 1,175 | ENSG00000157665  | DUSP18    | dual specificity phosphatase 18                                  | 1,177 | ENSG00000178149 | DALR3        | DALR anticodon binding domain containing 3                                            |
| 2,849 | ENSG00000158050  | DUSP2     | dual specificity phosphatase 2                                   | 1,306 | ENSG00000196730 | DAPK1        | death associated protein kinase 1                                                     |
| 2,449 | ENSG00000120875  | DUSP4     | dual specificity phosphatase 4                                   | 2,199 | ENSG00000167657 | DAPK3        | death associated protein kinase 3                                                     |
| 2,574 | ENSG00000138166  | DUSP5     | dual specificity phosphatase 5                                   | 1,827 | ENSG00000113758 | DBN1         | drebrin 1                                                                             |
| 2,878 | ENSG00000184545  | DUSP8     | dual specificity phosphatase 8                                   | 1,162 | ENSG00000003249 | DBND1        | dysbindin domain containing 1                                                         |
| 1,185 | ENSG00000197102  | DYNC1H1   | dynamitin cytoplasmic 1 heavy chain 1                            | 1,926 | ENSG00000146038 | DCC2C        | doublecortin domain containing 2                                                      |
| 1,381 | ENSG00000124874  | DZP1      | DZ1 interacting zinc finger protein 1                            | 1,077 | ENSG00000188215 | DCN1ND3      | defective in culin neddylation 1 domain containing 3                                  |
| 1,881 | ENSG00000158163  | DZP1L3    | DZ1 like ETS transcription factor 1 like                         | 1,166 | ENSG00000157322 | DDX21        | DEAD-box helicase 21                                                                  |
| 1,056 | ENSG00000088881  | EBF4      | early B-cell factor 4                                            | 1,066 | ENSG00000089737 | DDX24        | DEAD-box helicase 24                                                                  |
| 1,388 | ENSG00000038358  | EDC4      | enhancer of mRNA decapping 4                                     | 1,333 | ENSG00000215301 | DDX3X        | DEAD-box helicase 3, X-linked                                                         |
| 4,159 | ENSG00000078401  | EDN1      | endothelin 1                                                     | 1,438 | ENSG00000067048 | DDX3Y        | DEAD-box helicase 3, Y-linked                                                         |
| 2,536 | ENSG00000121729  | EDN2      | endothelin 2                                                     | 1,442 | ENSG00000080007 | DDX43        | DEAD-box helicase 43                                                                  |
| 1,253 | ENSG00000101210  | EF1A2     | eukaryotic translation elongation factor 1 alpha 2               | 1,087 | ENSG00000185163 | DDX51        | DEAD-box helicase 51                                                                  |
| 1,549 | ENSG00000122547  | EF1D1     | endonuclease/exonuclease/phosphatase family domain containing    | 2,278 | ENSG00000160570 | DEDD2        | death effector domain containing 2                                                    |
| 1,129 | ENSG00000096093  | EFHC1     | EF-hand domain containing 1                                      | 2,218 | ENSG00000177243 | DEFB103A/DEI | defensin beta 103B                                                                    |
| 1,112 | ENSG00000090776  | EFNB1     | ephrin B1                                                        | 1,368 | ENSG00000168350 | DEGS2        | delta 4-desaturase, sphingolipid 2                                                    |
| 1,2   | ENSG00000146648  | EGRF      | epidermal growth factor receptor                                 | 1,306 | ENSG00000175984 | DENND2C      | DENN domain containing 2C                                                             |
| 3,348 | ENSG00000235947  | EGOT      | eosinophil granule ontogeny transcript (non-protein coding)      | 1,541 | ENSG00000174485 | DENND4A      | DENN domain containing 4A                                                             |
| 3,87  |                  |           |                                                                  |       |                 |              |                                                                                       |

|       |                  |          |                                                                                    |       |                 |             |                                                                 |
|-------|------------------|----------|------------------------------------------------------------------------------------|-------|-----------------|-------------|-----------------------------------------------------------------|
| 1,044 | ENSG00000167280  | ENGASE   | endo-beta-N-acetylglucosaminidase                                                  | 5,795 | ENSG00000132002 | DNAI1B1     | DnaI heat shock protein family (Hsp40) member B1                |
| 1,293 | ENSG00000100393  | EP300    | E1A binding protein p300                                                           | 4,024 | ENSG00000162616 | DNAJB4      | DnaI heat shock protein family (Hsp40) member B4                |
| 1,059 | ENSG00000008867  | EPB4111  | erythrocyte membrane protein band 4.1 like 1                                       | 1,293 | ENSG00000105993 | DNAJB6      | DnaI heat shock protein family (Hsp40) member B6                |
| 2,514 | ENSG00000119808  | EPCAM    | epithelial cell adhesion molecule                                                  | 1,175 | ENSG00000105163 | DNAK25-GING | DNAK25-GING10 readthrough                                       |
| 1,077 | ENSG00000183317  | EPHA10   | EPH receptor A10                                                                   | 1,273 | ENSG00000116675 | DNAJC5      | DnaI heat shock protein family (Hsp40) member C6                |
| 2,966 | ENSG00000142627  | EPHA2    | EPH receptor A2                                                                    | 1,831 | ENSG00000107554 | DNMBP       | dynamitin binding protein                                       |
| 1,111 | ENSG00000177106  | EP5L2    | EP5L like 2                                                                        | 1,156 | ENSG00000147459 | DOCK5       | dedicator of cytokinesis 5                                      |
| 1,681 | ENSG00000198758  | EP5L3    | EP5L like 3                                                                        | 2,737 | ENSG00000104885 | DOT1L       | DOT1 like histone lysine methyltransferase                      |
| 3,051 | ENSG00000124882  | EREG     | epiregulin                                                                         | 1,125 | ENSG00000148399 | DPH7        | diphthamide biosynthesis 7                                      |
| 1,277 | ENSG00000177459  | ERICH5   | erythroid rich 5                                                                   | 1,903 | ENSG00000134755 | DSCC2       | desmocollin 2                                                   |
| 1,054 | ENSG00000134308  | ERN2     | endoplasmic reticulum to nucleus signaling 2                                       | 1,383 | ENSG00000134762 | DSC3        | desmocollin 3                                                   |
| 1,615 | ENSG00000116285  | ERRF1    | ERRB receptor feedback inhibitor 1                                                 | 1,884 | ENSG00000046604 | DSG2        | desmoglein 2                                                    |
| 1,622 | ENSG00000123462  | ERV3-1   | endogenous retrovirus group 3 member 1, envelope                                   | 1,956 | ENSG00000096966 | DSP         | desmoplakin                                                     |
| 1,887 | ENSG00000104413  | ESRP1    | epithelial splicing regulatory protein 1                                           | 1,054 | ENSG00000151914 | DST         | dystonin                                                        |
| 1,06  | ENSG00000196482  | ESRRG    | estrogen related receptor gamma                                                    | 1,451 | ENSG00000134769 | DTNA        | dystrobrevin alpha                                              |
| 1,799 | ENSG00000170306  | ETV3     | ETS variant 3                                                                      | 1,135 | ENSG00000091073 | DTX2        | detlex E3 ubiquitin ligase 2                                    |
| 2,315 | ENSG00000175832  | ETV4     | ETS variant 4                                                                      | 1,516 | ENSG00000140279 | DUOX2       | dual oxidase 2                                                  |
| 1,483 | ENSG00000072840  | EVC      | Evc ciliary complex subunit 1                                                      | 2,384 | ENSG00000140274 | DUOX2A      | dual oxidase maturation factor 2                                |
| 1,374 | ENSG00000173040  | EVC2     | Evc ciliary complex subunit 2                                                      | 2,309 | ENSG00000120129 | DUSP1       | dual specificity phosphatase 1                                  |
| 1,167 | ENSG00000187609  | EXD3     | exonuclease 3'-5' domain containing 3                                              | 1,929 | ENSG00000143507 | DUSP10      | dual specificity phosphatase 10                                 |
| 1,098 | ENSG00000144036  | EXOC6B   | exocyst complex component 6B                                                       | 1,154 | ENSG00000167065 | DUSP18      | dual specificity phosphatase 18                                 |
| 2,38  | ENSG000000092820 | EZR      | ezrin                                                                              | 2,763 | ENSG00000158050 | DUSP2       | dual specificity phosphatase 2                                  |
| 1,697 | ENSG00000164251  | F2RL1    | F2R like trypsin receptor 1                                                        | 2,555 | ENSG00000120875 | DUSP4       | dual specificity phosphatase 4                                  |
| 1,555 | ENSG00000117525  | F3       | coagulation factor III, tissue factor                                              | 3,3   | ENSG00000138166 | DUSP5       | dual specificity phosphatase 5                                  |
| 2,271 | ENSG00000103089  | FA2H     | fatty acid 2-hydroxylase                                                           | 2,79  | ENSG00000184545 | DUSP8       | dual specificity phosphatase 8                                  |
| 1,112 | ENSG00000221968  | FADS3    | fatty acid desaturase 3                                                            | 1,222 | ENSG00000197102 | DYNC1H1     | dynein cytoplasmic 1 heavy chain 1                              |
| 1,902 | ENSG00000167106  | FAM102A  | family with sequence similarity 102 member A                                       | 1,157 | ENSG00000127334 | DYRK2       | dual specificity tyrosine phosphorylation regulated kinase 2    |
| 1,159 | ENSG00000184731  | FAM110C  | family with sequence similarity 110 member C                                       | 1,163 | ENSG00000134874 | DZP1        | DAZ interacting zinc finger protein 1                           |
| 1,204 | ENSG00000138439  | FAM117B  | family with sequence similarity 117 member B                                       | 1,728 | ENSG00000155163 | DZP1L1      | DAZ interacting zinc finger protein 1 like                      |
| 1,579 | ENSG00000164142  | FAM160A1 | family with sequence similarity 160 member A1                                      | 1,042 | ENSG00000106196 | E2F6        | E2F transcription factor 6                                      |
| 1,251 | ENSG00000188163  | FAM166A  | family with sequence similarity 166 member A                                       | 1,766 | ENSG00000038358 | EDC4        | enhancer of mRNA decapping 4                                    |
| 1,569 | ENSG00000148468  | FAM171A1 | family with sequence similarity 171 member A1                                      | 5,154 | ENSG00000078401 | EDN1        | endothelin 1                                                    |
| 1,949 | ENSG00000146067  | FAM193B  | family with sequence similarity 193 member B                                       | 1,861 | ENSG00000127129 | EDN2        | endothelin 2                                                    |
| 1,076 | ENSG00000204860  | FAM201A  | family with sequence similarity 201 member A                                       | 1,066 | ENSG00000101210 | EEF1A2      | eukaryotic translation elongation factor 1 alpha 2              |
| 1,106 | ENSG00000183844  | FAM3B    | family with sequence similarity 3 member B                                         | 1,929 | ENSG00000122547 | EEPD1       | endonuclease/exonuclease/phosphatase family domain containing 1 |
| 1     | ENSG00000198643  | FAM43D   | family with sequence similarity 3 member D                                         | 1,124 | ENSG00000140588 | EFL1        | elongation factor like GTPase 1                                 |
| 2,927 | ENSG00000112773  | FAM46A   | family with sequence similarity 46 member A                                        | 1,318 | ENSG00000000776 | EFNB1       | ephrin B1                                                       |
| 2,298 | ENSG00000158246  | FAM46B   | family with sequence similarity 46 member B                                        | 1,599 | ENSG00000125266 | EFNB2       | ephrin B2                                                       |
| 1,244 | ENSG00000183508  | FAM46C   | family with sequence similarity 46 member C                                        | 1,154 | ENSG00000146648 | EGR         | epidermal growth factor receptor                                |
| 2,124 | ENSG00000120709  | FAM53C   | family with sequence similarity 53 member C                                        | 3,365 | ENSG00000235947 | EGOT        | eosinophil granule ontogeny transcript (non-protein coding)     |
| 1,301 | ENSG00000139146  | FAM63A   | family with sequence similarity 60 member A                                        | 3,692 | ENSG00000120738 | EGR1        | early growth response 1                                         |
| 1,418 | ENSG00000158143  | FAM83B   | family with sequence similarity 83 member B                                        | 2,25  | ENSG00000179388 | EGR3        | early growth response 3                                         |
| 1,873 | ENSG00000105523  | FAM83E   | family with sequence similarity 83 member E                                        | 1,093 | ENSG00000135625 | EGR4        | early growth response 4                                         |
| 2,746 | ENSG00000188522  | FAM83G   | family with sequence similarity 83 member G                                        | 2,879 | ENSG00000110047 | EHD1        | EH domain containing 1                                          |
| 1,333 | ENSG00000152767  | FARP1    | FERM, ARH/RhoGEF and pleckstrin domain protein 1                                   | 1,581 | ENSG00000103966 | EHD4        | EH domain containing 4                                          |
| 1,149 | ENSG00000162458  | FBLN1    | fibronectin binding LIM protein 1                                                  | 2,83  | ENSG00000135373 | EHF         | ETS homologous factor                                           |
| 1,146 | ENSG00000158680  | FBR5     | fibrosin                                                                           | 1,431 | ENSG00000255150 | EID3        | EP300 interacting inhibitor of differentiation 3                |
| 2,239 | ENSG00000171823  | FBX14    | F-box and leucine rich repeat protein 14                                           | 1,718 | ENSG00000107581 | EIF2A3      | eukaryotic translation initiation factor 2 alpha kinase 3       |
| 1,054 | ENSG00000130475  | FCHO1    | FCH and only 1                                                                     | 1,323 | ENSG00000107581 | EIF3A       | eukaryotic translation initiation factor 3 subunit A            |
| 1,062 | ENSG00000197948  | FCHS1D   | FCH and double SH3 domains 1                                                       | 1,297 | ENSG00000141543 | EIF4A3      | eukaryotic translation initiation factor 4A3                    |
| 1,602 | ENSG00000145780  | FEM1C    | fem-1 homolog C                                                                    | 1,291 | ENSG00000120690 | ELF1        | E74 like ETS transcription factor 1                             |
| 1,281 | ENSG00000180263  | FGD6     | FYVE, RhoGEF and PH domain containing 6                                            | 2,113 | ENSG00000163435 | ELF3        | E74 like ETS transcription factor 3                             |
| 1,386 | ENSG00000162344  | FGF19    | fibroblast growth factor 19                                                        | 1,691 | ENSG00000105656 | ELL         | elongation factor for RNA polymerase II                         |
| 1,029 | ENSG00000139675  | FGF5     | fibroblast growth factor 5                                                         | 2,386 | ENSG00000154181 | ELUO17      | ELUO17 actin elongator 7                                        |
| 1,406 | ENSG00000065648  | FGFR2    | fibroblast growth factor receptor 2                                                | 2,512 | ENSG00000134531 | EMP1        | epithelial membrane protein 1                                   |
| 2,122 | ENSG00000068078  | FGFR3    | fibroblast growth factor receptor 3                                                | 1,303 | ENSG00000154380 | ENAH        | enabled homolog (Drosophila)                                    |
| 1,001 | ENSG00000160867  | FGFR4    | fibroblast growth factor receptor 4                                                | 1,33  | ENSG00000171617 | ENC1        | ectodermal-neural cortex 1                                      |
| 2,356 | ENSG00000168386  | FILIP1L  | filamin A interacting protein 1 like                                               | 1,342 | ENSG00000100393 | EP300       | E3A binding protein p300                                        |
| 1,963 | ENSG00000004478  | FKBP4    | FK506 binding protein 4                                                            | 1,122 | ENSG00000120616 | EPC1        | enhancer of polycomb homolog 1                                  |
| 1,845 | ENSG00000136068  | FLNB     | fibronectin leucine rich transmembrane protein 2                                   | 2,758 | ENSG00000118888 | EPCAM       | epithelial cell adhesion molecule                               |
| 1,262 | ENSG00000185070  | FLRT2    | fibronectin leucine rich transmembrane protein 2                                   | 3,749 | ENSG00000146217 | EPHA2       | EPH receptor A2                                                 |
| 2,014 | ENSG00000125848  | FLRT3    | fibronectin leucine rich transmembrane protein 3                                   | 1,136 | ENSG00000182580 | EPHA3       | EPH receptor B3                                                 |
| 1,63  | ENSG00000137942  | FNBP1L   | formin binding protein 1 like                                                      | 1,926 | ENSG00000198758 | EP5L3       | EP5L like 3                                                     |
| 1,392 | ENSG00000109920  | FNBP4    | formin binding protein 4                                                           | 2,933 | ENSG00000124882 | EREG        | epiregulin                                                      |
| 1,507 | ENSG00000110195  | FOK1     | folate receptor 1                                                                  | 1,115 | ENSG00000134398 | ERN2        | endoplasmic reticulum to nucleus signaling 2                    |
| 4,008 | ENSG00000170345  | FOS      | Fos proto-oncogene, AP-1 transcription factor subunit                              | 2,114 | ENSG00000116285 | ERRF1       | ERRB receptor feedback inhibitor 1                              |
| 6,003 | ENSG00000140010  | FOSB     | FosB proto-oncogene, AP-1 transcription factor subunit                             | 1,323 | ENSG00000127562 | ERV3-1      | endogenous retrovirus group 3 member 1, envelope                |
| 4,17  | ENSG00000175592  | FOSL1    | FOS like 1, AP-1 transcription factor subunit                                      | 1,454 | ENSG00000164283 | ESM1        | endothelial cell specific molecule 1                            |
| 1,985 | ENSG00000075426  | FOSL2    | FOS like 2, AP-1 transcription factor subunit                                      | 1,601 | ENSG00000104413 | ESRP1       | epithelial splicing regulatory protein 1                        |
| 1,404 | ENSG00000129514  | FOXA1    | forkhead box A1                                                                    | 1,189 | ENSG00000196482 | ESRRG       | estrogen related receptor gamma                                 |
| 1,374 | ENSG00000125798  | FOXA2    | forkhead box A2                                                                    | 2,044 | ENSG00000134954 | ETS1        | ETS proto-oncogene 1, transcription factor                      |
| 1,38  | ENSG00000129654  | FOXJ1    | forkhead box J1                                                                    | 1,539 | ENSG00000175757 | ETV2        | ETS variant 2, transcription factor                             |
| 1,345 | ENSG00000159077  | FOXO1    | forkhead box O1                                                                    | 1,61  | ENSG00000170306 | ETV3        | ETS variant 3                                                   |
| 1,122 | ENSG00000118689  | FOXO3    | forkhead box O3                                                                    | 2,038 | ENSG00000175832 | ETV4        | ETS variant 4                                                   |
| 1,172 | ENSG00000114861  | FOXP1    | forkhead box P1                                                                    | 1,458 | ENSG00000072840 | EVC         | Evc ciliary complex subunit 1                                   |
| 1,265 | ENSG00000128573  | FOXP2    | forkhead box P2                                                                    | 1,396 | ENSG00000173040 | EVC2        | Evc ciliary complex subunit 2                                   |
| 2,905 | ENSG00000164379  | FOXQ1    | forkhead box Q1                                                                    | 1,063 | ENSG00000182944 | EWSR1       | EWS RNA binding protein 1                                       |
| 1,389 | ENSG00000138759  | FRAS1    | Fraser extracellular matrix complex subunit 1                                      | 1,26  | ENSG00000187609 | EXD3        | exonuclease 3'-5' domain containing 3                           |
| 1,247 | ENSG00000181274  | FRAT2    | FRAT2, Wnt signaling pathway regulator                                             | 1,142 | ENSG00000144035 | EXOC6B      | exocyst complex component 6B                                    |
| 1,354 | ENSG00000124541  | FREM1D   | FERM domain containing 4B                                                          | 1,295 | ENSG00000116903 | EXOC8       | exocyst complex component 8                                     |
| 1,252 | ENSG00000106701  | FSO1L    | fibronectin type III and SPRY domain containing 1 like                             | 1,286 | ENSG00000106462 | EZH2        | enhancer of zeste 2 polycomb repressive complex 2 subunit       |
| 2,087 | ENSG00000070404  | FSTL3    | folliculin like 3                                                                  | 3,111 | ENSG00000092820 | EZR         | ezrin                                                           |
| 1,155 | ENSG000000889280 | FUS      | FUS RNA binding protein                                                            | 2,565 | ENSG00000164251 | F2RL1       | F2R like trypsin receptor 1                                     |
| 1,21  | ENSG0000017124   | FUT3     | fucosyltransferase 3 (Lewis blood group)                                           | 2,027 | ENSG00000117525 | F3          | coagulation factor III, tissue factor                           |
| 1,467 | ENSG00000196371  | FUT4     | fucosyltransferase 4                                                               | 2,849 | ENSG00000103089 | FA2H        | fatty acid 2-hydroxylase                                        |
| 1,816 | ENSG00000137731  | FXYD2    | FXYD domain containing ion transport regulator 2                                   | 1,429 | ENSG00000221968 | FADS3       | fatty acid desaturase 3                                         |
| 1,284 | ENSG000000089356 | FXYD3    | FXYD domain containing ion transport regulator 3                                   | 2,981 | ENSG00000167106 | FAM102A     | family with sequence similarity 102 member A                    |
| 1,386 | ENSG00000157240  | FZD1     | frizzled class receptor 1                                                          | 1,164 | ENSG00000065809 | FAM107B     | family with sequence similarity 107 member B                    |
| 1,499 | ENSG00000102287  | GABRE    | gamma-aminobutyric acid type A receptor epsilon subunit                            | 2,055 | ENSG00000184731 | FAM110C     | family with sequence similarity 110 member C                    |
| 2,093 | ENSG00000094755  | GABRP    | gamma-aminobutyric acid type A receptor pi subunit                                 | 1,105 | ENSG00000082269 | FAM135A     | family with sequence similarity 135 member A                    |
| 1,487 | ENSG00000116717  | GADD45A  | growth arrest and DNA damage inducible alpha                                       | 2,356 | ENSG00000164142 | FAM160A1    | family with sequence similarity 160 member A1                   |
| 1,485 | ENSG00000098600  | GADD45B  | growth arrest and DNA damage inducible beta                                        | 1,140 | ENSG00000100009 | FAM160A2    | family with sequence similarity 160 member A2                   |
| 1,319 | ENSG00000128242  | GALST3T1 | galactose-3-O-sulfotransferase 1                                                   | 1,834 | ENSG00000188163 | FAM166A     | family with sequence similarity 166 member A                    |
| 1,678 | ENSG00000119514  | GALNT12  | polypeptide N-acetylgalactosaminyltransferase 12                                   | 1,054 | ENSG00000152102 | FAM168B     | family with sequence similarity 168 member B                    |
| 2,333 | ENSG00000153390  | GALNT3   | polypeptide N-acetylgalactosaminyltransferase 3                                    | 1,679 | ENSG00000148468 | FAM171A1    | family with sequence similarity 171 member A1                   |
| 1,486 | ENSG00000205759A | GALNT4   | polypeptide N-acetylgalactosaminyltransferase 4                                    | 1,178 | ENSG00000125386 | FAM193A     | family with sequence similarity 193 member A                    |
| 1,237 | ENSG00000141448  | GATA6    | GATA binding protein 6                                                             | 2,121 | ENSG00000146067 | FAM193B     | family with sequence similarity 193 member B                    |
| 1,029 | ENSG00000170510  | GBA2     | glucosylceramidase beta 2                                                          | 1,176 | ENSG00000103238 | FAM244B     | family with sequence similarity 214 member B                    |
| 1,055 | ENSG00000107862  | GBF1     | golgi brefeldin A resistant guanine nucleotide exchange factor 1                   | 1,167 | ENSG00000198643 | FAM3D       | family with sequence similarity 3 member D                      |
| 1,096 | ENSG00000117228  | GBP1     | guanylate binding protein 1                                                        | 2,907 | ENSG00000112773 | FAM46A      | family with sequence similarity 46 member A                     |
| 1,948 | ENSG00000140297  | GCNT3    | glucosaminyl (N-acetyl) transferase 3, mucin type growth differentiation factor 15 | 2,744 | ENSG00000158246 | FAM46B      | family with sequence similarity 46 member B                     |
| 2,112 | ENSG00000130513  | GDGF5    | gamma-glutamyltransferase 6                                                        | 1,385 | ENSG00000183508 | FAM46C      | family with sequence similarity 46 member C                     |
| 2,527 | ENSG00000167741  | GGT6     | gamma-glutamyltransferase 6                                                        | 2,242 | ENSG00000120709 | FAM53C      | family with sequence similarity 53 member C                     |
| 1,195 | ENSG00000106128  | GHRHR    | growth hormone releasing hormone receptor                                          | 1,474 | ENSG00000116765 | FAM57A      | family with sequence similarity 57 member A                     |
| 1,085 | ENSG00000146830  | GIGYF1   | GRB10 interacting GYF protein 1                                                    | 1,349 | ENSG00000139146 | FAM60A      | family with sequence similarity 60 member A                     |
| 1,62  | ENSG00000188910  | GIB3     | gap junction protein beta 3                                                        | 1,86  | ENSG00000168143 | FAM83B      | family with sequence similarity 83 member B                     |
| 1,212 | ENSG00000126603  | GLIS2    | GLIS family zinc finger 2                                                          | 2,023 | ENSG00000105523 | FAM83E      | family with sequence similarity 83 member E                     |
| 1,989 | ENSG00000107249  | GLIS3    | GLIS family zinc finger 3                                                          | 3,435 | ENSG00000188522 | FAM83G      | family with sequence similarity 83 member G                     |

|       |                  |           |                                                                                |       |                 |             |                                                                  |
|-------|------------------|-----------|--------------------------------------------------------------------------------|-------|-----------------|-------------|------------------------------------------------------------------|
| 3,814 | ENSG00000113070  | HBEFG     | heparin binding EGF like growth factor histone deacetylase 9                   | 1,536 | ENSG00000110195 | FOLR1       | folate receptor 1                                                |
| 1,084 | ENSG00000048052  | HDAC9     |                                                                                | 3,627 | ENSG00000170345 | FOS         | Fos proto-oncogene, AP-1 transcription factor subunit            |
| 1,094 | ENSG00000167674  | HDGF12    | HDGF like 2                                                                    | 5,894 | ENSG00000125740 | FOSB        | FosB proto-oncogene, AP-1 transcription factor subunit           |
| 2,702 | ENSG00000230267  | HERC2P4   | hect domain and RLD 2 pseudogene 4                                             | 5,978 | ENSG00000157500 | FOSL1       | FOS like 1, AP-1 transcription factor subunit                    |
| 1,005 | ENSG00000143515  | HES1      | hes family bHLH transcription factor 1                                         | 2,21  | ENSG00000075426 | FOSL2       | FOS like 2, AP-1 transcription factor subunit                    |
| 1,902 | ENSG00000188290  | HES4      | hes family bHLH transcription factor 4                                         | 1,502 | ENSG00000129514 | FOXA1       | forkhead box A1                                                  |
| 1,454 | ENSG00000186834  | HEXIM1    | hexamethylene bisacetamide inducible 1                                         | 1,553 | ENSG00000125798 | FOXA2       | forkhead box A2                                                  |
| 1,139 | ENSG00000100644  | HIF1A     | hypoxia inducible factor 1 alpha subunit                                       | 2,03  | ENSG00000129654 | FOXJ1       | forkhead box J1                                                  |
| 1,902 | ENSG00000130787  | HIP1R     | huntingtin interacting protein 1 related histone cluster 1 H2A family member d | 1,174 | ENSG00000198815 | FOXJ3       | forkhead box J3                                                  |
| 2,159 | ENSG00000196866  | HIST1H2AD | histone cluster 1 H2A family member d                                          | 1,103 | ENSG00000164916 | FOXK1       | forkhead box K1                                                  |
| 1,409 | ENSG00000124635  | HIST1H2B  | histone cluster 1 H2B family member j                                          | 1,829 | ENSG00000159007 | FOXO1       | forkhead box O1                                                  |
| 2,318 | ENSG00000233822  | HIST1H2BM | histone cluster 1 H2B family member n                                          | 1,072 | ENSG00000118689 | FOXO3       | forkhead box O3                                                  |
| 1,994 | ENSG00000197409  | HIST1H3D  | histone cluster 1 H3 family member d                                           | 1,115 | ENSG00000114861 | FOXP1       | forkhead box P1                                                  |
| 1,251 | ENSG00000197153  | HIST1H3J  | histone cluster 1 H3 family member j                                           | 3,162 | ENSG00000164379 | FOXP1       | forkhead box P1                                                  |
| 1,603 | ENSG00000196890  | HIST3H2BB | histone cluster 3 H2B family member b                                          | 1,305 | ENSG00000138759 | FRAS1       | Fraser extracellular matrix complex subunit 1                    |
| 1,456 | ENSG00000197837  | HIST4H4   | histone cluster 4 H4                                                           | 1,343 | ENSG00000181274 | FRA2T       | FRA2T, WNT signaling pathway regulator                           |
| 1,026 | ENSG00000095951  | HIVEP1    | human immunodeficiency virus type 1 enhancer binding protein 2                 | 1,325 | ENSG00000118161 | FRK         | tyrosine related Src family tyrosine kinase                      |
| 1,831 | ENSG00000108188  | HIVEP2    | human immunodeficiency virus type 1 enhancer binding protein 2                 | 1,114 | ENSG00000172159 | FRMD3       | FERM domain containing 3                                         |
| 1,701 | ENSG00000156510  | HKDC1     | hexokinase domain containing 1                                                 | 1,888 | ENSG00000114541 | FRMD4B      | FERM domain containing 4B                                        |
| 2,612 | ENSG00000137309  | HMGAI1    | high mobility group AT-hook 1                                                  | 1,455 | ENSG00000139926 | FRMD6       | FERM domain containing 6                                         |
| 1,443 | ENSG00000113161  | HMGCR     | 3-hydroxy-3-methylglutaryl-CoA reductase                                       | 1,715 | ENSG00000106701 | FSDL1       | fibronectin type III and SPRY domain containing 1 like           |
| 1,823 | ENSG00000112972  | HMGCS1    | 3-hydroxy-3-methylglutaryl-CoA synthase 1                                      | 2,497 | ENSG00000070404 | FSTL3       | folliculin like 3                                                |
| 1,063 | ENSG00000113716  | HMGXB3    | HMG-box containing 3                                                           | 1,109 | ENSG00000126513 | FUBP1       | far upstream element binding protein 1                           |
| 1,195 | ENSG00000177733  | HNRNPA0   | heterogeneous nuclear ribonucleoprotein A0                                     | 1,368 | ENSG00000089280 | FUS         | FUS RNA binding protein                                          |
| 1,352 | ENSG00000169045  | HNRNPH1   | heterogeneous nuclear ribonucleoprotein H1                                     | 1,437 | ENSG00000171124 | FUT3        | fucosyltransferase 3 (Lewis blood group)                         |
| 1,039 | ENSG00000096746  | HNRNPH3   | heterogeneous nuclear ribonucleoprotein H3                                     | 1,533 | ENSG00000196371 | FUT4        | fucosyltransferase 4                                             |
| 1,595 | ENSG00000153187  | HNRNPM    | heterogeneous nuclear ribonucleoprotein M                                      | 1,224 | ENSG00000137371 | FXYD2       | FXYD domain containing ion transport regulator 2                 |
| 1,125 | ENSG00000103942  | HOMER2    | homer scaffolding protein 2                                                    | 1,248 | ENSG00000089356 | FXYD3       | FXYD domain containing ion transport regulator 3                 |
| 7,313 | ENSG00000257017  | HP        | HP protein                                                                     | 1,386 | ENSG00000157440 | FZD1        | frizzled class receptor 1                                        |
| 1,146 | ENSG00000127852  | HRS       | HRS like suppressor                                                            | 1,046 | ENSG00000102458 | GAB1        | GAB2 associated binding protein 1                                |
| 1,477 | ENSG00000002587  | HSS1T1    | heparan sulfate-glucosamine 3-sulfotransferase 1                               | 1,22  | ENSG00000102287 | GABRE       | gamma-aminobutyric acid type A receptor epsilon subunit          |
| 1,022 | ENSG00000099251  | HS017B7P2 | hydroxyteroid 17-beta dehydrogenase 2 pseudogene 2                             | 2,149 | ENSG00000094755 | GABRP       | gamma-aminobutyric acid type A receptor pi subunit               |
| 1,627 | ENSG00000102878  | HSF4      | heat shock transcription factor 4                                              | 2,012 | ENSG00000116717 | GADD45A     | growth arrest and DNA damage inducible alpha                     |
| 2,399 | ENSG000000080824 | HSP90AA1  | heat shock protein 90 alpha family class A member 1                            | 1,576 | ENSG00000099860 | GADD45B     | growth arrest and DNA damage inducible beta                      |
| 2,668 | ENSG00000096384  | HSP90AB1  | heat shock protein 90 alpha family class B member 1                            | 1,781 | ENSG00000069482 | GAL         | galanin and GMAP prepropeptide                                   |
| 2,059 | ENSG00000075060  | HSP90AB2P | heat shock protein 90 alpha family class B member 2, pseudogene                | 1,172 | ENSG00000138242 | GALST1      | galactose 3-O-sulfotransferase 1                                 |
| 1,081 | ENSG00000109400  | HSPA4     | heat shock protein family A (Hsp70) member 4                                   | 1,796 | ENSG00000119514 | GALNT12     | polypeptide N-acetylgalactosaminyltransferase 12                 |
| 1,319 | ENSG00000164070  | HSPA4L    | heat shock protein family A (Hsp70) member 4 like                              | 2,37  | ENSG00000115339 | GALNT3      | polypeptide N-acetylgalactosaminyltransferase 3                  |
| 1,29  | ENSG000000044574 | HSPA5     | heat shock protein family A (Hsp70) member 5                                   | 1,33  | ENSG00000257594 | GALNT4      | polypeptide N-acetylgalactosaminyltransferase 4                  |
| 6,995 | ENSG00000173110  | HSPA6     | heat shock protein family A (Hsp70) member 6                                   | 1,151 | ENSG00000141448 | GATA6       | GATA binding protein 6                                           |
| 6,679 | ENSG00000225217  | HSPA7     | heat shock protein family A (Hsp70) member 7                                   | 1,206 | ENSG00000070610 | GBA2        | glucosylceramidase beta 2                                        |
| 2,462 | ENSG00000109974  | HSPA8     | heat shock protein family A (Hsp70) member 8                                   | 1,377 | ENSG00000107862 | GBF1        | golgi brefeldin A resistant guanine nucleotide exchange factor 1 |
| 1,387 | ENSG00000144381  | HSPD1     | heat shock protein family D (Hsp60) member 1                                   | 1,327 | ENSG00000117228 | GBP1        | guanylate binding protein 1                                      |
| 5,132 | ENSG00000120694  | HSPH1     | heat shock protein family H (Hsp110) member 1                                  | 1,275 | ENSG00000162645 | GBP2        | guanylate binding protein 2                                      |
| 2,069 | ENSG00000142149  | HUNK      | hormonally up-regulated Neu-associated kinase                                  | 2,079 | ENSG00000140297 | GCNT3       | glucosaminyl (N-acetyl) transferase 3, mucin type                |
| 1,038 | ENSG00000157423  | HYDIN     | HYDIN, axonemal central pair apparatus protein                                 | 1,798 | ENSG00000130513 | GDF15       | growth differentiation factor 15                                 |
| 1,283 | ENSG00000163996  | ICAM1     | islet cell autologin 1 like                                                    | 1,84  | ENSG00000164949 | GEM         | GTP binding protein overexpressed in skeletal muscle             |
| 2,229 | ENSG00000090339  | ICAM1     | intercellular adhesion molecule 1                                              | 2,261 | ENSG00000157741 | GGT3        | gamma-glutamyltransferase 6                                      |
| 1,102 | ENSG00000105371  | ICAM4     | intercellular adhesion molecule 4 (Landssteiner-Wiener blood group)            | 2,266 | ENSG00000118910 | GIB3        | gap junction protein beta 3                                      |
| 1,034 | ENSG00000172201  | ID4       | inhibitor of DNA binding 4, HLH protein                                        | 1,071 | ENSG00000189433 | GIB4        | gap junction protein beta 4                                      |
| 2,429 | ENSG00000232656  | ID2-AS1   | ID2 antisense RNA 1                                                            | 1,013 | ENSG00000126603 | GUS2        | GUS family zinc finger 2                                         |
| 1,349 | ENSG00000127415  | IDUA      | iduronidase, alpha-L                                                           | 1,869 | ENSG00000107249 | GUS3        | GUS family zinc finger 3                                         |
| 2,343 | ENSG00000160888  | IER2      | immediate early response 2                                                     | 1,003 | ENSG00000237009 | GUS3-AS1    | GUS3 antisense RNA 1                                             |
| 3,488 | ENSG00000162783  | IER5      | immediate early response 5                                                     | 1,325 | ENSG00000115419 | GUS5        | glutamine S1                                                     |
| 1,004 | ENSG00000188483  | IERL3     | immediate early response 5 like                                                | 1,176 | ENSG00000101216 | GMEB2       | glucocorticoid modulatory element binding protein 2              |
| 1,91  | ENSG00000169991  | IFO2      | intermediate filament family orphan 2                                          | 1,962 | ENSG00000120063 | GNA13       | G protein subunit alpha 13                                       |
| 1,823 | ENSG00000006652  | IFRD1     | interferon related developmental regulator 1                                   | 1,035 | ENSG00000156052 | GNAQ        | G protein subunit alpha q                                        |
| 1,545 | ENSG00000187535  | IFT140    | intraflagellar transport 140                                                   | 1,169 | ENSG00000134697 | GNL2        | G protein nucleolar 2                                            |
| 1,056 | ENSG00000138002  | IFT172    | intraflagellar transport 172                                                   | 1,655 | ENSG00000212522 | GOLGA8A/GOI | golgin A8 family member A                                        |
| 1,12  | ENSG00000122970  | IFTB1     | intraflagellar transport B1                                                    | 1,111 | ENSG00000116580 | GONAL       | gon-4 like                                                       |
| 1,495 | ENSG00000077392  | IFG2BP2   | insulin like growth factor 2 mRNA binding protein 2                            | 1,233 | ENSG00000138678 | GPAT3       | glycerol-3-phosphate acyltransferase 3                           |
| 1,709 | ENSG00000143061  | IGSF3     | immunoglobulin superfamily member 3                                            | 1,009 | ENSG00000158669 | GPAT4       | glycerol-3-phosphate acyltransferase 4                           |
| 1,416 | ENSG00000150782  | IL18      | interleukin 18                                                                 | 1,377 | ENSG00000186566 | GPATC8      | G-patch domain containing 8                                      |
| 2,389 | ENSG00000125538  | IL18      | interleukin 1 beta                                                             | 1,28  | ENSG00000062194 | GPBP1       | GC-rich promoter binding protein 1                               |
| 3,182 | ENSG00000110944  | IL23A     | interleukin 23 subunit alpha                                                   | 1,064 | ENSG00000115159 | GPD2        | glycerol-3-phosphate dehydrogenase 2                             |
| 1,057 | ENSG00000077238  | IL4R      | interleukin 4 receptor                                                         | 2,294 | ENSG00000166073 | GRP176      | G protein-coupled receptor 176                                   |
| 2,2   | ENSG00000136244  | IL6       | interleukin 6                                                                  | 1,004 | ENSG00000170837 | GRP27       | G protein-coupled receptor 27                                    |
| 1,345 | ENSG00000145103  | IL10R1    | immunoglobulin like domain containing receptor 1                               | 1,277 | ENSG00000181773 | GRP3        | G protein-coupled receptor 3                                     |
| 1,73  | ENSG00000129351  | ILF3      | interleukin enhancer binding factor 3                                          | 3,516 | ENSG00000135888 | GRPC5A      | G protein-coupled receptor class C group 5 member A              |
| 1,323 | ENSG00000203485  | INF2      | inverted formin, FH2 and WH2 domain containing                                 | 2,653 | ENSG00000167191 | GRPC5B      | G protein-coupled receptor class C group 5 member B              |
| 2,122 | ENSG00000122641  | INHBA     | inhibin beta A subunit                                                         | 1,938 | ENSG00000203271 | GRAMD1B     | GRAM domain containing 1B                                        |
| 1,132 | ENSG00000148384  | INPPE5    | inositol polyphosphate 5-phosphatase E                                         | 1,021 | ENSG00000106070 | GRB10       | growth factor receptor bound protein 10                          |
| 1,896 | ENSG00000164066  | INTU1     | inturned planar cell polarity protein                                          | 2,393 | ENSG00000111738 | GRB7        | growth factor receptor bound protein 7                           |
| 1,017 | ENSG00000161896  | IPK3      | inositol hexakisphosphate kinase 3                                             | 2,021 | ENSG00000083307 | GRHL2       | grainyhead like transcription factor 2                           |
| 2,335 | ENSG00000133221  | IQCA1     | IQ motif containing with AAA domain 1                                          | 1,046 | ENSG00000084207 | GSTP1       | glutathione S-transferase pi 1                                   |
| 1,416 | ENSG00000174628  | IQCK      | IQ motif containing K                                                          | 2,297 | ENSG00000100226 | GTPBP1      | GTP binding protein 1                                            |
| 1,083 | ENSG00000164675  | IQUB      | IQ motif and ubiquitin domain containing                                       | 1,144 | ENSG00000107937 | GTPBP4      | GTP binding protein 4                                            |
| 1,926 | ENSG00000134070  | IRAK2     | interleukin 1 receptor associated kinase 2                                     | 1,239 | ENSG00000197273 | GUCY2A      | guanylate cyclase activator 2A                                   |
| 1,855 | ENSG00000125347  | IRF1      | interferon regulatory factor 1                                                 | 1,103 | ENSG00000144866 | GULP1       | GULP, engulfment adaptor PTB domain containing 1                 |
| 1,064 | ENSG00000168264  | IRF2BP2   | interferon regulatory factor 2 binding protein 2                               | 1,437 | ENSG00000228315 | GUSBP11     | glucuronidase, beta pseudogene 11                                |
| 1,628 | ENSG00000117595  | IRF6      | interferon regulatory factor 6                                                 | 1,126 | ENSG00000253203 | GUSBP3      | glucuronidase, beta pseudogene 3                                 |
| 1,124 | ENSG00000167378  | IRGQ      | immunity related GTPase Q                                                      | 1,276 | ENSG00000184897 | H1FX        | H1 histone family member X                                       |
| 2,15  | ENSG00000185950  | IRS2      | insulin receptor substrate 2                                                   | 1,813 | ENSG00000188486 | H2AFX       | H2A histone family member X                                      |
| 1,812 | ENSG00000105655  | ISYNA1    | inositol 3-phosphate synthase 1                                                | 1,393 | ENSG00000132475 | H3F3A/H3F3B | H3 histone family member 3A                                      |
| 1,497 | ENSG00000164771  | ITGA2     | integrin subunit alpha 2                                                       | 1,365 | ENSG00000188875 | H3F3C       | H3 histone family member 3C                                      |
| 2,222 | ENSG00000005884  | ITGA3     | integrin subunit alpha 3                                                       | 1,467 | ENSG00000140511 | H4LN3       | hyaluronan and proteoglycan link protein 3                       |
| 1,317 | ENSG00000161638  | ITGA5     | integrin subunit alpha 5                                                       | 1,089 | ENSG00000103044 | HAS3        | hyaluronan synthase 3                                            |
| 1,024 | ENSG00000091409  | ITGA6     | integrin subunit alpha 6                                                       | 4,913 | ENSG00000113070 | HBEFG       | heparin binding EGF like growth factor                           |
| 1,949 | ENSG00000132470  | ITGB4     | integrin subunit beta 4                                                        | 1,097 | ENSG00000061273 | HDAC7       | histone deacetylase 7                                            |
| 1,493 | ENSG00000115221  | ITGB6     | integrin subunit beta 6                                                        | 2,059 | ENSG00000048052 | HDAC9       | histone deacetylase 9                                            |
| 2,461 | ENSG00000105855  | ITGB8     | integrin subunit beta 8                                                        | 2,865 | ENSG00000230267 | HERC2P4     | hect domain and RLD 2 pseudogene 4                               |
| 1,874 | ENSG00000132343  | ITIH5     | inter-alpha-trypsin inhibitor heavy chain family member 5                      | 1,942 | ENSG00000188290 | HES4        | hes family bHLH transcription factor 4                           |
| 2,98  | ENSG00000086544  | ITPKC     | inositol-trisphosphate 3-kinase C                                              | 1,537 | ENSG00000186834 | HEXIM1      | hexamethylene bisacetamide inducible 1                           |
| 1,333 | ENSG00000009643  | ITPR3     | inositol 1,4,5-trisphosphate receptor type 3                                   | 1,201 | ENSG00000164683 | HEY1        | hes related family bHLH transcription factor with YRPW motif 1   |
| 1,074 | ENSG00000171988  | JMJD1C    | jumonin domain containing 1C                                                   | 1,209 | ENSG00000185359 | HGS         | hepatocyte growth factor-regulated tyrosine kinase substrate     |
| 1,973 | ENSG00000070495  | JMJD6     | arginine demethylase and lysine hydroxylase                                    | 1,468 | ENSG00000100644 | HIF1A       | hypoxia inducible factor 1 alpha subunit                         |
| 3,82  | ENSG00000178606  | JUN       | Jun proto-oncogene, AP-1 transcription factor subunit                          | 1,796 | ENSG00000130787 | HIP1R       | huntingtin interacting protein 1 related                         |
| 1,896 | ENSG00000173120  | JUNB      | JunB proto-oncogene, AP-1 transcription factor subunit                         | 1,224 | ENSG00000124635 | HIST1H2B1   | histone cluster 1 H2B family member j                            |
| 3,112 | ENSG00000130522  | JUND      | JunD proto-oncogene, AP-1 transcription factor subunit                         | 2,215 | ENSG00000233822 | HIST1H2BM   | histone cluster 1 H2B family member n                            |
| 2,83  | ENSG00000146049  | KAAG1     | kidney associated antigen 1                                                    | 2,188 | ENSG00000197409 | HIST1H3D    | histone cluster 1 H3 family member d                             |
| 1,851 | ENSG00000162975  | KCNF1     | potassium voltage-gated channel modifier subfamily F member 1                  | 1,388 | ENSG00000196890 | HIST3H2BB   | histone cluster 3 H2B family member b                            |
| 1,212 | ENSG00000182132  | KCNIP1    | potassium voltage-gated channel interacting protein 1                          | 1,476 | ENSG00000095951 | HIVEP1      | human immunodeficiency virus type 1 enhancer binding protein 2   |
| 1,057 | ENSG00000115474  | KCNJ13    | potassium voltage-gated channel subfamily J member 13                          | 2,465 | ENSG00000108188 | HIVEP2      | human immunodeficiency virus type 1 enhancer binding protein 2   |
| 1,286 | ENSG00000157521  | KCNJ15    | potassium voltage-gated channel subfamily J member 15                          | 1,135 | ENSG00000153938 | HWE2        | hexokinase 2                                                     |
| 1,521 | ENSG00000153822  | KCNJ16    | potassium voltage-gated channel subfamily J member 16                          | 1,557 | ENSG00000156510 | HKDC1       | hexokinase domain containing 1                                   |
| 1,088 | ENSG00000082482  | KCNK2     | potassium two pore domain channel subfamily K member 2                         | 3,751 | ENSG00000137309 | HMGAI1      | high mobility group AT-hook 1                                    |
| 1,802 | ENSG00000164626  | KCNK5     | potassium two pore domain channel                                              |       |                 |             |                                                                  |

|       |                 |           |                                                                   |       |                 |           |                                                                    |
|-------|-----------------|-----------|-------------------------------------------------------------------|-------|-----------------|-----------|--------------------------------------------------------------------|
| 3,227 | ENSG00000162413 | KLHL21    | kelch like family member 21                                       | 2,82  | ENSG00000090339 | ICAM1     | intercellular adhesion molecule 1                                  |
| 1,503 | ENSG00000119771 | KLHL29    | kelch like family member 29                                       | 1,803 | ENSG00000105371 | ICAM2     | intercellular adhesion molecule 4 (Lundsteiner-Wiener blood group) |
| 1,493 | ENSG00000129451 | KLK10     | kallikrein related peptidase 10                                   | 1,298 | ENSG00000172201 | ID4       | inhibitor of DNA binding 4, HLH protein                            |
| 1,814 | ENSG00000167557 | KLK11     | kallikrein related peptidase 11                                   | 1,984 | ENSG00000123556 | ID2-AS1   | ID2 antisense RNA 1                                                |
| 1,082 | ENSG00000050583 | KMT2E     | lysine methyltransferase 2E                                       | 1,455 | ENSG00000127415 | IDUA      | iduronidase, alpha-1                                               |
| 1,023 | ENSG00000171346 | KRT15     | keratin 15                                                        | 2,492 | ENSG00000160888 | IER2      | immediate early response 2                                         |
| 4,214 | ENSG00000128422 | KRT17     | keratin 17                                                        | 3,46  | ENSG00000162783 | IER5      | immediate early response 5                                         |
| 1,259 | ENSG00000111057 | KRT18     | keratin 18                                                        | 1,696 | ENSG00000169991 | IFG2      | intermediate filament family orphan 2                              |
| 2,836 | ENSG00000171345 | KRT19     | keratin 19                                                        | 1,274 | ENSG00000111537 | IFNG      | interferon gamma                                                   |
| 1,097 | ENSG00000185479 | KRT6B     | keratin 6B                                                        | 1,983 | ENSG00000096652 | IFRD1     | interferon related developmental regulator 1                       |
| 2,644 | ENSG00000135480 | KRT7      | keratin 7                                                         | 1,253 | ENSG00000137355 | IFT140    | intraflagellar transport 140                                       |
| 1,573 | ENSG00000170421 | KRT8      | keratin 8                                                         | 1,667 | ENSG00000073792 | IGFBP2    | insulin like growth factor 2 mRNA binding protein 2                |
| 2,57  | ENSG00000167767 | KRT80     | keratin 80                                                        | 1,707 | ENSG00000143061 | IGSF3     | immunoglobulin superfamily member 3                                |
| 1,931 | ENSG00000205426 | KRT81     | keratin 81                                                        | 1,349 | ENSG00000150782 | IL18      | interleukin 18                                                     |
| 1,802 | ENSG00000170442 | KRT86     | keratin 86                                                        | 1,206 | ENSG00000115598 | IL1RL2    | interleukin 1 receptor like 2                                      |
| 1,158 | ENSG00000187026 | KRTAP21-2 | keratin associated protein 21-2                                   | 3,618 | ENSG00000110994 | IL23A     | interleukin 23 subunit alpha                                       |
| 1,066 | ENSG00000157992 | KRTCAP3   | keratinocyte associated protein 3                                 | 1,298 | ENSG00000077238 | IL4R      | interleukin 4 receptor                                             |
| 2,084 | ENSG00000159166 | LAD1      | ladinin 1                                                         | 5,066 | ENSG00000136244 | IL6       | interleukin 6                                                      |
| 1,436 | ENSG00000101680 | LAMA1     | laminin subunit alpha 1                                           | 2,081 | ENSG00000160712 | IL6R      | interleukin 6 receptor                                             |
| 1,326 | ENSG00000053747 | LAMA3     | laminin subunit alpha 3                                           | 1,123 | ENSG00000145103 | ILDR1     | immunoglobulin like domain containing receptor 1                   |
| 2,175 | ENSG00000130702 | LAMAS     | laminin subunit alpha 5                                           | 1,109 | ENSG00000143621 | ILF2      | interleukin enhancer binding factor 2                              |
| 1,504 | ENSG00000172037 | LAMB2     | laminin subunit beta 2                                            | 1,561 | ENSG00000129351 | ILF3      | interleukin enhancer binding factor 3                              |
| 2,997 | ENSG00000196878 | LAMB3     | laminin subunit beta 3                                            | 1,344 | ENSG00000203485 | INP2      | inverted formin, F102 and WH2 domain containing                    |
| 2,117 | ENSG00000135862 | LAMC1     | laminin subunit gamma 1                                           | 2,306 | ENSG00000122641 | INHBA     | inhibin beta A subunit                                             |
| 3,697 | ENSG00000058085 | LAMC2     | laminin subunit gamma 2                                           | 1,173 | ENSG00000148384 | INPPE5    | inositol polyphosphate-5-phosphatase E                             |
| 1,573 | ENSG00000165905 | LARGE2    | LARGE xylosyl- and glucuronyltransferase 2                        | 1,086 | ENSG00000164066 | INTU      | inturned planar cell polarity protein                              |
| 1,961 | ENSG00000166173 | LARP6     | La ribonucleoprotein domain family member 6                       | 1,071 | ENSG00000176095 | IP6K1     | inositol hexakisphosphate kinase 1                                 |
| 1,186 | ENSG00000131023 | LATS1     | large tumor suppressor kinase 1                                   | 2,005 | ENSG00000132321 | IQCA1     | IQ motif containing with AAA domain 1                              |
| 1,061 | ENSG00000204381 | LAYN      | laylin                                                            | 1,36  | ENSG00000174628 | IQCK      | IQ motif containing K                                              |
| 1,433 | ENSG00000135338 | LCA5      | LCA5, lebercilin                                                  | 1,357 | ENSG00000140575 | IQGAP1    | IQ motif containing GTPase activating protein 1                    |
| 1,622 | ENSG00000148346 | LCN2      | lipocalin 2                                                       | 2,992 | ENSG00000134070 | IRAK2     | interleukin 1 receptor associated kinase 2                         |
| 1,047 | ENSG00000243709 | LEFTY1    | left-right determination factor 1                                 | 1,783 | ENSG00000125347 | IRF1      | interferon regulatory factor 1                                     |
| 1,085 | ENSG00000174106 | LEMD3     | LEM domain containing 3                                           | 1,349 | ENSG00000168264 | IRF2BP2   | interferon regulatory factor 2 binding protein 2                   |
| 1,154 | ENSG00000100079 | LGALS2    | galactin 2                                                        | 1,647 | ENSG00000117595 | IRF6      | interferon regulatory factor 6                                     |
| 1,342 | ENSG00000145685 | LHPF2     | lipoma HMOG fusion partner-like 2                                 | 1,144 | ENSG00000167378 | IRGQ      | immunity related GTPase G1                                         |
| 3,36  | ENSG00000128342 | LIF       | LIF, interleukin 6 family cytokine                                | 2,171 | ENSG00000185960 | IRSZ      | insulin receptor substrate 2                                       |
| 1,055 | ENSG00000182541 | LIMK2     | LIM domain kinase 2                                               | 1,603 | ENSG00000105655 | ISYNA1    | inositol-3-phosphate synthase 1                                    |
| 1,8   | ENSG00000225880 | LINC00115 | long intergenic non-protein coding RNA 115                        | 2,25  | ENSG00000164171 | ITGA2     | integrin subunit alpha 2                                           |
| 1,126 | ENSG00000231028 | LINC00271 | long intergenic non-protein coding RNA 271                        | 2,094 | ENSG00000050884 | ITGA3     | integrin subunit alpha 3                                           |
| 1,14  | ENSG00000232327 | LINC00472 | long intergenic non-protein coding RNA 472                        | 1,799 | ENSG00000161638 | ITGA5     | integrin subunit alpha 5                                           |
| 1,405 | ENSG00000258169 | LINC00485 | long intergenic non-protein coding RNA 485                        | 1,156 | ENSG00000091409 | ITGA6     | integrin subunit alpha 6                                           |
| 1,428 | ENSG00000163898 | IPH       | ipsose H                                                          | 1,109 | ENSG00000168995 | ITGAM     | integrin subunit alpha M                                           |
| 1,797 | ENSG00000073350 | LLGL2     | LLGL2, scribble cell polarity complex component                   | 1,401 | ENSG00000138448 | ITGAV     | integrin subunit alpha V                                           |
| 1,173 | ENSG00000154359 | LONRF1    | LON peptidase N-terminal domain and ring finger 1                 | 2,037 | ENSG00000132470 | ITGB4     | integrin subunit beta 4                                            |
| 1,669 | ENSG00000064547 | LPAR2     | lysophosphatidic acid receptor 2                                  | 1,85  | ENSG00000115221 | ITGB6     | integrin subunit beta 6                                            |
| 1,837 | ENSG00000139263 | LRIG3     | leucine rich repeats and immunoglobulin like domains 3            | 2,671 | ENSG00000105855 | ITGB8     | integrin subunit beta 8                                            |
| 1,368 | ENSG00000137269 | LRRC1     | leucine rich repeat containing 1                                  | 1,449 | ENSG00000123243 | ITIH5     | inter-alpha-trypsin inhibitor heavy chain family member 5          |
| 1,425 | ENSG00000140814 | LRRC27    | leucine rich repeat containing 27                                 | 3,934 | ENSG00000165854 | ITPK3     | inositol triphosphate 3-kinase C                                   |
| 1,22  | ENSG00000159708 | LRRC36    | leucine rich repeat containing 36                                 | 1,418 | ENSG00000096433 | ITPR3     | inositol 1,4,5-trisphosphate receptor type 3                       |
| 1,403 | ENSG00000178026 | LRRC75B   | leucine rich repeat containing 75B                                | 1,12  | ENSG00000080803 | JARID2    | jumonji and AT-rich interaction domain containing 2                |
| 1,438 | ENSG00000171017 | LRRC8E    | leucine rich repeat containing 8 family member E                  | 1,286 | ENSG00000171988 | JMJD1C    | jumonji domain containing 1C                                       |
| 2,434 | ENSG00000175928 | LRRN1     | leucine rich repeat neuronal 1                                    | 2,052 | ENSG00000170495 | JMJD6     | arginine demethylase and lysine hydroxylase                        |
| 1,692 | ENSG00000125872 | LRRN4     | leucine rich repeat neuronal 4                                    | 1,037 | ENSG00000183340 | JRK1      | JRK-like                                                           |
| 1,256 | ENSG00000073952 | LCUCL1    | leucine rich repeat containing 1                                  | 3,46  | ENSG00000174628 | JUN1      | Jun proto-oncogene, AP-1 transcription factor subunit              |
| 1,241 | ENSG00000153714 | LURAP1L   | leucine rich adaptor protein 1 like                               | 1,84  | ENSG00000171223 | JUNB      | JunB proto-oncogene, AP-1 transcription factor subunit             |
| 1,69  | ENSG00000150556 | LYPD6B    | LY6/PLAUR domain containing 6B                                    | 3,047 | ENSG00000130522 | JUND      | JunD proto-oncogene, AP-1 transcription factor subunit             |
| 1,414 | ENSG00000181541 | MAB21L2   | mab-21 like 2                                                     | 2,578 | ENSG00000146049 | KAAG1     | kidney associated antigen 1                                        |
| 1,089 | ENSG00000173212 | MAB21L3   | mab-21 like 3                                                     | 1,42  | ENSG00000170852 | KRTBD2    | kelch repeat and BTB domain containing 2                           |
| 2,691 | ENSG00000183742 | MACC1     | MACC1, MET transcriptional regulator                              | 1,095 | ENSG00000120696 | KRTBD7    | kelch repeat and BTB domain containing 7                           |
| 3,138 | ENSG00000185022 | MAFF      | MAF K2IP transcription factor F                                   | 1,614 | ENSG00000162975 | KCNF1     | potassium voltage-gated channel modifier subfamily F member 1      |
| 2,165 | ENSG00000163615 | MAFG      | MAF K2IP transcription factor G                                   | 1,937 | ENSG00000192661 | KCNH1     | potassium two pore domain channel subfamily K member 1             |
| 1,098 | ENSG00000265688 | MAFG-AS1  | MAFG antisense RNA 1 (head to head)                               | 1,678 | ENSG00000164626 | KCNK5     | potassium two pore domain channel subfamily K member 5             |
| 1,949 | ENSG00000198517 | MAFK      | MAF K2IP transcription factor K                                   | 1,218 | ENSG00000104783 | KCNNA     | potassium calcium-activated channel subfamily N member 4           |
| 1,362 | ENSG00000187243 | MAGED4/N  | MAGE family member D4B                                            | 1,185 | ENSG00000213859 | KCTD11    | potassium channel tetramerization domain containing 11             |
| 1,559 | ENSG00000151276 | MAGI1     | membrane associated guanylate kinase, WW and PDZ domain conta     | 1,415 | ENSG00000174943 | KCTD13    | potassium channel tetramerization domain containing 13             |
| 1,996 | ENSG00000251562 | MALAT1    | metastasis associated lung adenocarcinoma transcript 1 (non-prote | 1,221 | ENSG00000104756 | KCTD58    | potassium channel tetramerization domain containing 9              |
| 1,278 | ENSG00000193624 | MAL2      | materiamin like transcriptional coactivator 2                     | 1,750 | ENSG00000173139 | KDM2A     | lysine demethylase 2A                                              |
| 1,327 | ENSG00000197769 | MAP1LC3   | microtubule associated protein 1 light chain 3 gamma              | 2,531 | ENSG00000117139 | KDM5B     | lysine demethylase 5B                                              |
| 1,492 | ENSG00000130479 | MAP1S     | microtubule associated protein 1S                                 | 1,72  | ENSG00000147050 | KDM6A     | lysine demethylase 6A                                              |
| 1,498 | ENSG00000078018 | MAP2      | microtubule associated protein 2                                  | 2,143 | ENSG00000132510 | KDM6B     | lysine demethylase 6B                                              |
| 1,157 | ENSG00000034152 | MAP2K3    | mitogen-activated protein kinase kinase 3                         | 1,058 | ENSG00000100441 | KHNYN     | KH and NYN domain containing                                       |
| 1,524 | ENSG00000095015 | MAP3K1    | mitogen-activated protein kinase kinase kinase 1                  | 1,341 | ENSG00000047578 | KIAA0556  | KIAA0556                                                           |
| 1,795 | ENSG00000020662 | MAP3K14   | mitogen-activated protein kinase kinase kinase 14                 | 1,24  | ENSG00000162961 | KIAA0895  | KIAA0895                                                           |
| 2,519 | ENSG00000107968 | MAP3K8    | mitogen-activated protein kinase kinase kinase 8                  | 1,615 | ENSG00000196123 | KIAA0895L | KIAA0895 like                                                      |
| 1,738 | ENSG00000060432 | MAP3K9    | mitogen-activated protein kinase kinase kinase 9                  | 1,286 | ENSG00000120549 | KIAA1217  | KIAA1217                                                           |
| 1,027 | ENSG00000047849 | MAP4      | microtubule associated protein 4                                  | 1,688 | ENSG00000162522 | KIAA1522  | KIAA1522                                                           |
| 1,35  | ENSG00000116871 | MAP7D1    | MAP7 domain containing 1                                          | 2,526 | ENSG00000136883 | KIF12     | kinesin family member 12                                           |
| 1,197 | ENSG00000156711 | MAPK13    | mitogen-activated protein kinase 13                               | 1,068 | ENSG00000131437 | KIF3A     | kinesin family member 3A                                           |
| 1,688 | ENSG00000138854 | MAPK8IP3  | mitogen-activated protein kinase 8 interacting protein 3          | 1,433 | ENSG00000157702 | KIF2C     | kinesin family member C2                                           |
| 1,198 | ENSG00000179326 | MARCKB    | membrane associated ring-CH-type finger 3                         | 1,071 | ENSG00000151657 | KIN       | Kin17 DNA and RNA binding protein                                  |
| 1,385 | ENSG00000145495 | MARCKH    | membrane associated ring-CH-type finger 6                         | 1,339 | ENSG00000174996 | KLC2      | kinesin light chain 2                                              |
| 1,464 | ENSG00000175130 | MARCKSL1  | MARCKS like 1                                                     | 2,097 | ENSG00000104892 | KLC3      | kinesin light chain 3                                              |
| 1,133 | ENSG00000072518 | MARK2     | microtubule affinity regulating kinase 2                          | 2,057 | ENSG00000155090 | KLF10     | Kruppel like factor 10                                             |
| 1,031 | ENSG00000140832 | MARVELD3  | MARVEL domain containing 3                                        | 2,596 | ENSG00000127528 | KLF2      | Kruppel like factor 2                                              |
| 1,136 | ENSG00000164430 | MBD1D1    | Mab-21 domain containing 1                                        | 1,361 | ENSG00000109787 | KLF3      | Kruppel like factor 3                                              |
| 1,057 | ENSG00000166987 | MBD5      | methyl-CpG binding domain protein 6                               | 6,628 | ENSG00000136836 | KLF4      | Kruppel like factor 4                                              |
| 1,111 | ENSG00000172197 | MBOAT1    | membrane bound O-acyltransferase domain containing 1              | 4,299 | ENSG00000102554 | KLF5      | Kruppel like factor 5                                              |
| 2,004 | ENSG00000177669 | MBOAT4    | membrane bound O-acyltransferase domain containing 4              | 3,757 | ENSG00000067082 | KLF6      | Kruppel like factor 6                                              |
| 1,199 | ENSG00000258839 | MC1R      | melanocortin 1 receptor                                           | 1,576 | ENSG00000118263 | KLF7      | Kruppel like factor 7                                              |
| 1,568 | ENSG00000076706 | MCAM      | melanoma cell adhesion molecule                                   | 1,107 | ENSG00000174010 | KLHL15    | kelch like family member 15                                        |
| 1,158 | ENSG00000126217 | MCF2L     | MCF 2 cell line derived transforming sequence like                | 1,216 | ENSG00000187961 | KLHL17    | kelch like family member 17                                        |
| 2,387 | ENSG00000143384 | MCL1      | MCL1, BCL2 family apoptosis regulator                             | 4,872 | ENSG00000123413 | KLK12     | kelch like family member 21                                        |
| 1,202 | ENSG00000055732 | MCOLN3    | mucoilin 3                                                        | 1,086 | ENSG00000183655 | KLK12S    | kelch like family member 25                                        |
| 1,081 | ENSG00000156026 | MCU       | mitochondrial calcium uniporter                                   | 4,99  | ENSG00000119771 | KLK129    | kelch like family member 29                                        |
| 1,347 | ENSG00000110492 | MDK       | midkine (neurite growth-promoting factor 2)                       | 1,719 | ENSG00000129451 | KLK10     | kallikrein related peptidase 10                                    |
| 1,061 | ENSG00000198625 | MDM4      | MDM4, p53 regulator                                               | 2,033 | ENSG00000167757 | KLK11     | kallikrein related peptidase 11                                    |
| 1,108 | ENSG00000151376 | ME3       | malic enzyme 3                                                    | 1,026 | ENSG00000256667 | KLRAP1    | killer cell lectin like receptor A1, pseudogene                    |
| 1,117 | ENSG00000009917 | MDL5      | melanin-concentrating subunit 15                                  | 1,203 | ENSG00000185463 | KMT2E     | lysine methyltransferase 2E                                        |
| 1,808 | ENSG00000163975 | MED1F     | mesoderm development candidate 1                                  | 1,307 | ENSG00000185467 | KPNAT7    | karyopherin subunit alpha 7                                        |
| 1,145 | ENSG00000140406 | MESDC1    | mesoderm development candidate 1                                  | 1,163 | ENSG00000171346 | KRT15     | keratin 15                                                         |
| 1,068 | ENSG00000166823 | MESP1     | mesoderm posterior bHLH transcription factor 1                    | 4,013 | ENSG00000128422 | KRT17     | keratin 17                                                         |
| 1,178 | ENSG00000105976 | MET       | MET proto-oncogene, receptor tyrosine kinase                      | 1,454 | ENSG00000111057 | KRT18     | keratin 18                                                         |
| 2,038 | ENSG00000214756 | METTL12   | methyltransferase like 12                                         | 3,172 | ENSG00000173445 | KRT19     | keratin 19                                                         |
| 1,04  | ENSG00000144401 | METTL21A  | methyltransferase like 21A                                        | 2,843 | ENSG00000135480 | KRT7      | keratin 7                                                          |
| 1,495 | ENSG00000176624 | MEK3C     | mex-3 RNA binding family member C                                 | 1,897 | ENSG00000170421 | KRT8      | keratin 8                                                          |
| 1,01  | ENSG00000147324 | MFHAS1    | malignant fibrous histiocytoma amplified sequence 1               | 2,939 | ENSG00000167767 | KRT80     | keratin 80                                                         |
| 1,236 | ENSG00000151690 | MFSDE     | major facilitator superfamily domain containing 6                 | 1,201 | ENSG00000205426 | KRT81     | keratin 81                                                         |
| 1,086 | ENSG00000185156 | MFSD6L    | major facilitator superfamily domain containing 6 like            | 1,32  | ENSG00000170442 | KRT86     | keratin 86                                                         |
| 1,789 | ENSG00000243156 | MICAL3    | microtubule associated monooxygenase, calponin and                |       |                 |           |                                                                    |



|       |                  |          |                                                                   |       |                   |              |                                                                             |
|-------|------------------|----------|-------------------------------------------------------------------|-------|-------------------|--------------|-----------------------------------------------------------------------------|
| 2,395 | ENS000000196611  | MMP1     | matrix metalloproteinase 1                                        | 1,57  | ENS000000073350   | LLGL2        | LLGL2, scribble cell polarity complex component                             |
| 1,701 | ENS000000016670  | MMP10    | matrix metalloproteinase 10                                       | 1,168 | ENS0000000176619  | LMNB2        | limin B2                                                                    |
| 1,057 | ENS0000000157227 | MMP14    | matrix metalloproteinase 14                                       | 1,443 | ENS0000000136153  | LMO7         | LIM domain 7                                                                |
| 1,259 | ENS000000010296  | MMP15    | matrix metalloproteinase 15                                       | 1,216 | ENS000000016715   | LMW2         | lamin tyrosine kinase 2                                                     |
| 1,368 | ENS000000012342  | MMP19    | matrix metalloproteinase 19                                       | 1,095 | ENS0000000142178  | LOC102724428 | salt inducible kinase 1                                                     |
| 1,195 | ENS0000000125966 | MMP24    | matrix metalloproteinase 24                                       | 1,269 | ENS0000000154359  | LNORF1       | LON peptidase N-terminal domain and ring finger 1                           |
| 2,578 | ENS0000000137673 | MMP7     | matrix metalloproteinase 7                                        | 1,777 | ENS0000000064547  | LPAR2        | lysophosphatidic acid receptor 2                                            |
| 1,124 | ENS0000000130675 | MNX1     | motor neuron and pancreas homeobox 1                              | 1,441 | ENS0000000134324  | LPN1         | lipin 1                                                                     |
| 1,446 | ENS0000000120162 | MOB3B    | MOB kinase activator 3B                                           | 1,121 | ENS0000000173621  | LRFN4        | leucine rich repeat and fibronectin type III domain containing 4            |
| 1,216 | ENS0000000161647 | MPP3     | membrane palmitoylated protein 3                                  | 1,124 | ENS0000000144749  | LRG1         | leucine rich repeats and immunoglobulin like domains 1                      |
| 1,061 | ENS0000000133020 | MPP8     | myosin phosphatase Rho interacting protein                        | 1,174 | ENS0000000139363  | LRG3         | leucine rich repeats and immunoglobulin like domains 3                      |
| 1,382 | ENS0000000160588 | MPZL3    | myelin protein zero like 3                                        | 1,269 | ENS0000000137269  | LRR1C        | leucine rich repeat containing 1                                            |
| 1,037 | ENS0000000174579 | MSL2     | male-specific lethal 2 homolog (Drosophila)                       | 1,313 | ENS0000000254402  | LRR2C4       | leucine rich repeat containing 24                                           |
| 1,649 | ENS0000000163132 | MSX1     | msh homeobox 1                                                    | 1,207 | ENS0000000137821  | LRR4C9       | leucine rich repeat containing 49                                           |
| 1,109 | ENS0000000120149 | MSX2     | msh homeobox 2                                                    | 1,194 | ENS0000000178026  | LRR7C5B      | leucine rich repeat containing 75B                                          |
| 1,797 | ENS0000000256618 | MTRNR2L1 | MT-RNR2-like 1                                                    | 1,548 | ENS0000000197147  | LRR8C8       | leucine rich repeat containing 8 family member B                            |
| 1,654 | ENS0000000256045 | MTRNR2L2 | MT-RNR2-like 2                                                    | 1,175 | ENS0000000170317  | LRR8CE       | leucine rich repeat containing 8 family member E                            |
| 1,672 | ENS0000000071043 | MTRNR2L2 | MT-RNR2-like 2                                                    | 1,079 | ENS0000000124831  | LRRFP1       | LRR binding FUII interacting protein 1                                      |
| 1,627 | ENS0000000255823 | MTRNR2L8 | MT-RNR2-like 8                                                    | 1,218 | ENS0000000093167  | LRRFP2       | LRR binding FUII interacting protein 2                                      |
| 1,552 | ENS0000000185499 | MUC1     | mucin 1, cell surface associated                                  | 1,218 | ENS0000000175928  | LRRN1        | leucine rich repeat neuronal 1                                              |
| 1,553 | ENS0000000176945 | MUC20    | mucin 20, cell surface associated                                 | 1,465 | ENS0000000125872  | LRRN4        | leucine rich repeat neuronal 4                                              |
| 1,17  | ENS0000000117983 | MUC5B    | mucin 5B, oligomeric mucus/gel-forming                            | 1,448 | ENS000000007392   | LUC7L        | LUC7 like                                                                   |
| 3,706 | ENS0000000184956 | MUC6     | mucin 6, oligomeric mucus/gel-forming                             | 1,362 | ENS0000000137714  | LURAP1L      | leucine rich adaptor protein 1 like                                         |
| 1,638 | ENS0000000157502 | MUM1L1   | MUM1 like 1                                                       | 1,043 | ENS0000000169641  | LUZP1        | leucine zipper protein 1                                                    |
| 2,732 | ENS0000000059728 | MXD1     | MAX dimerization protein 1                                        | 1,658 | ENS0000000150556  | LYPD6B       | LY6/PLAUR domain containing 6B                                              |
| 2,2   | ENS0000000179820 | MYADM    | myeloid associated differentiation marker                         | 1,086 | ENS0000000181541  | MAB2L12      | mab-21 like 2                                                               |
| 1,069 | ENS0000000132382 | MYBBP1A  | MYB binding protein 1a                                            | 3,369 | ENS0000000183742  | MACC1        | MACC1, MET transcriptional regulator                                        |
| 2,293 | ENS0000000136997 | MYC      | MYC proto-oncogene, bHLH transcription factor                     | 1,223 | ENS0000000182759  | MAFA         | MAF bZIP transcription factor A                                             |
| 1,443 | ENS0000000104177 | MYF2     | myosin expression factor 2                                        | 3,447 | ENS0000000185022  | MAFF         | MAF bZIP transcription factor F                                             |
| 1,423 | ENS0000000105357 | MYH14    | myosin heavy chain 14                                             | 2,676 | ENS0000000107063  | MAFG         | MAF bZIP transcription factor G                                             |
| 1,785 | ENS0000000100345 | MYH9     | myosin heavy chain 9                                              | 1,079 | ENS0000000256588  | MAFG-AS1     | MAFG antisense RNA 1 (head to head)                                         |
| 2,022 | ENS0000000007944 | MYLIP    | myosin regulatory light chain interacting protein                 | 2,107 | ENS0000000198517  | MAFK         | MAF bZIP transcription factor K                                             |
| 1,981 | ENS0000000145555 | MYO10    | myosin X                                                          | 1,736 | ENS0000000187243  | MAGED4/MA6   | MAGE family member D4B                                                      |
| 1,007 | ENS0000000197879 | MYO1C    | myosin IC                                                         | 1,584 | ENS0000000151276  | MAGI1        | membrane associated guanylate kinase, WW and PDZ domain containing 1        |
| 1,064 | ENS0000000157483 | MYO1B    | myosin IIE                                                        | 1,079 | ENS0000000081026  | MAG3         | membrane associated guanylate kinase, WW and PDZ domain containing 3        |
| 1,324 | ENS0000000095777 | MYO3A    | myosin IIIA                                                       | 1,449 | ENS0000000111837  | MAK          | male germ cell associated kinase                                            |
| 1,336 | ENS0000000128833 | MYO5C    | myosin VC                                                         | 1,211 | ENS0000000147676  | MAL2         | mal, T-cell differentiation protein 2 (gene/pseudogene)                     |
| 1,155 | ENS0000000196586 | MYO6     | myosin VI                                                         | 1,786 | ENS0000000251562  | MALAT1       | metastasis associated lung adenocarcinoma transcript 1 (non-protein coding) |
| 1,196 | ENS0000000138119 | MYOF     | myoferlin                                                         | 1,469 | ENS0000000184384  | MAML2        | mastermind like transcriptional coactivator 2                               |
| 1,202 | ENS0000000261355 | MYZAP    | myocardial zonula adherens protein                                | 1,043 | ENS0000000197769  | MAP1L3C3     | microtubule associated protein 1 light chain 3 gamma                        |
| 1,986 | ENS0000000099926 | MYZB1    | myoD zinc finger 1                                                | 2,102 | ENS0000000130479  | MAP15        | microtubule associated protein 15                                           |
| 1,46  | ENS0000000127256 | NAA16    | N[alpha]-acetyltransferase 16, NATA auxiliary subunit             | 1,421 | ENS0000000189018  | MAP2         | microtubule associated protein 2                                            |
| 1,088 | ENS0000000105983 | NAA40    | N[alpha]-acetyltransferase 40, NAD catalytic subunit              | 2,128 | ENS0000000034152  | MAP2K3       | mitogen-activated protein kinase kinase 3                                   |
| 1,472 | ENS000000017694  | NAALADL2 | N-acetylated alpha-linked acidic dipeptidase like 2               | 1,57  | ENS0000000095015  | MAP3K1       | mitogen-activated protein kinase kinase kinase 1                            |
| 1,111 | ENS0000000172915 | NBEA     | neurobeachin                                                      | 2,1   | ENS000000006062   | MAP3K14      | mitogen-activated protein kinase kinase kinase 14                           |
| 1,397 | ENS0000000160796 | NBEAL2   | neurobeachin like 2                                               | 2,795 | ENS0000000107968  | MAP3K8       | mitogen-activated protein kinase kinase kinase 8                            |
| 3,113 | ENS0000000144959 | NCEH1    | neutral cholesterol ester hydrolase 1                             | 1,795 | ENS0000000096432  | MAP3K9       | mitogen-activated protein kinase kinase kinase 9                            |
| 1,98  | ENS0000000071051 | NCE2     | NCX adaptor protein 2                                             | 1,195 | ENS0000000178490  | MAP4         | microtubule associated protein 4                                            |
| 2,972 | ENS0000000111912 | NCOA7    | nuclear receptor coactivator 7                                    | 1,571 | ENS0000000115566  | MAP4K3       | mitogen-activated protein kinase kinase kinase 3                            |
| 1,118 | ENS0000000141027 | NCOR1    | nuclear receptor corepressor 1                                    | 1,261 | ENS0000000071054  | MAP4K4       | mitogen-activated protein kinase kinase kinase 4                            |
| 1,536 | ENS0000000245532 | NEAT1    | nuclear paraspeckle assembly transcript 1 (non-protein coding)    | 1,841 | ENS000000012983   | MAP4K5       | mitogen-activated protein kinase kinase kinase 5                            |
| 1,306 | ENS0000000130202 | NECTIN2  | nectin cell adhesion molecule 2                                   | 1,871 | ENS0000000116871  | MAP7D1       | MAP7 domain containing 1                                                    |
| 2,153 | ENS0000000143217 | NECTIN4  | nectin cell adhesion molecule 4                                   | 1,137 | ENS0000000156711  | MAPK13       | mitogen-activated protein kinase 13                                         |
| 1,515 | ENS0000000100959 | NECDL    | neural precursor cell expressed, developmentally down-regulated 4 | 1,493 | ENS0000000145268  | MAPK9P3      | mitogen-activated protein kinase 8 interacting protein 3                    |
| 2,514 | ENS0000000111859 | NEDD9    | neural precursor cell expressed, developmentally down-regulated 9 | 1,135 | ENS0000000101367  | MAPRE1       | microtubule associated protein RYFB family member 1                         |
| 1,026 | ENS0000000114670 | NEK11    | NIMA related kinase 11                                            | 1,232 | ENS0000000173926  | MARCH3       | membrane associated ring-CH-type finger 3                                   |
| 1,029 | ENS0000000160602 | NEK8     | NIMA related kinase 8                                             | 1,629 | ENS0000000145495  | MARCH6       | membrane associated ring-CH-type finger 6                                   |
| 1,238 | ENS0000000067141 | NEO1     | neogenin 1                                                        | 1,354 | ENS0000000175130  | MARCKSL1     | MARCKS like 1                                                               |
| 1,215 | ENS000000013848  | NET1     | neuroepithelial cell transforming 1                               | 1,315 | ENS0000000072518  | MARX2        | microtubule affinity regulating kinase 2                                    |
| 2,183 | ENS0000000163121 | NEURL3   | neuraltized E3 ubiquitin protein ligase 3                         | 1,063 | ENS0000000140882  | MARVELD3     | MARVEL domain containing 3                                                  |
| 1,374 | ENS0000000102908 | NFAT5    | nuclear factor of activated T-cells 5                             | 1,054 | ENS0000000189018  | MARX2        | microtubule associated serine/threonine kinase 2                            |
| 2,113 | ENS0000000131196 | NFATC1   | nuclear factor of activated T-cells 1                             | 1,251 | ENS0000000069020  | MAST4        | microtubule associated serine/threonine kinase family member 4              |
| 1,915 | ENS0000000050344 | NFE2L3   | nuclear factor, erythroid 2 like 3                                | 1,334 | ENS0000000168906  | MAT2A        | methionine adenosyltransferase 2A                                           |
| 1,484 | ENS0000000165030 | NFIL3    | nuclear factor, interleukin 3 regulated                           | 2,178 | ENS0000000177669  | MBOAT4       | membrane bound O-acetyltransferase domain containing 4                      |
| 1,517 | ENS0000000109320 | NFKB1    | nuclear factor kappa B subunit 1                                  | 1,647 | ENS0000000076706  | MCAM         | membrane cell adhesion molecule                                             |
| 1,655 | ENS000000007150  | NFKB2    | nuclear factor kappa B subunit 2                                  | 2,731 | ENS0000000143384  | MCL1         | MCL1, BCL2 family apoptosis regulator                                       |
| 1,589 | ENS0000000167604 | NFKBID   | NFKB inhibitor delta                                              | 1,361 | ENS000000005372   | MCLN3        | mitochondrial calcium uniporter                                             |
| 2,028 | ENS0000000146232 | NFKBIE   | NFKB inhibitor epsilon                                            | 1,473 | ENS0000000156026  | MCU          | mitochondrial calcium uniporter                                             |
| 4,124 | ENS0000000144802 | NFKBIZ   | NFKB inhibitor zeta                                               | 1,239 | ENS0000000110492  | MDX          | midkine (neurite growth-promoting factor 2)                                 |
| 1,387 | ENS0000000001167 | NFYA     | nuclear transcription factor Y subunit alpha                      | 1,189 | ENS0000000151376  | ME3          | malic enzyme 3                                                              |
| 1,089 | ENS0000000101004 | NINL     | ninein like                                                       | 1,31  | ENS0000000099917  | MED15        | mediator complex subunit 15                                                 |
| 1,114 | ENS0000000167034 | NKX3-1   | NK3 homeobox 1                                                    | 1,543 | ENS0000000042429  | MED17        | mediator complex subunit 17                                                 |
| 1,116 | ENS0000000165246 | NLGN4Y   | neuroligin 4, Y-linked                                            | 1,113 | ENS0000000214548  | MEDG3        | maternally expressed 3 (non-protein coding)                                 |
| 1,597 | ENS0000000197696 | NMB      | neuromedin B                                                      | 1,437 | ENS0000000163975  | MELTF        | melanotransferrin                                                           |
| 2,061 | ENS0000000112981 | NME5     | NME/NM23 family member 5                                          | 1,388 | ENS0000000228109  | MELTF-AS1    | MELTF antisense RNA 1                                                       |
| 1,374 | ENS0000000151014 | NOCT     | nocturnin                                                         | 1,184 | ENS0000000140406  | MESDC1       | mesoderm development candidate 1                                            |
| 1,501 | ENS0000000188747 | NOXA1    | NADPH oxidase activator 1                                         | 2,189 | ENS0000000105976  | MET          | MET proto-oncogene, receptor tyrosine kinase                                |
| 1,161 | ENS0000000170485 | NPAS2    | neuronal PAS domain protein 2                                     | 1,789 | ENS0000000214756  | METTL12      | methyltransferase like 12                                                   |
| 1,211 | ENS0000000141658 | NPC1     | NPC intracellular cholesterol transporter 1                       | 1,93  | ENS0000000176524  | MEX3C        | mex-3 RNA binding family member C                                           |
| 1,154 | ENS0000000051520 | NPC1L1   | NPC1 like intracellular cholesterol transporter 1                 | 1,026 | ENS0000000151588  | MEX3D        | mex-3 RNA binding family member D                                           |
| 1,164 | ENS0000000215440 | NPEPL1   | aminopeptidase-like 1                                             | 1,168 | ENS0000000147324  | MFHAS1       | malignant fibrous histiocytoma amplified sequence 1                         |
| 1,201 | ENS0000000141279 | NPEPP5   | aminopeptidase puromycin sensitive                                | 1,141 | ENS0000000109736  | MFSD10       | major facilitator superfamily domain containing 10                          |
| 1,314 | ENS0000000183426 | NPIP47   | (inc nuclear pore complex interacting protein family member A7)   | 1,095 | ENS0000000151690  | MFSD6        | major facilitator superfamily domain containing 6                           |
| 1,601 | ENS0000000169246 | NPNB5    | (inc nuclear pore complex interacting protein family member B4)   | 1,912 | ENS0000000243156  | MICAL3       | microtubule associated monooxygenase, calponin and LIM domain containing 3  |
| 1,683 | ENS0000000168743 | NPNY2    | nephronectin                                                      | 1,544 | ENS0000000167470  | MIR9         | miR-9                                                                       |
| 1,551 | ENS0000000106236 | NPTX2    | neuronal pentraxin 2                                              | 1,094 | ENS0000000139013  | MINDY2       | MINDY lysine 48 deubiquitinase 2                                            |
| 1,606 | ENS0000000131910 | NROB2    | nuclear receptor subfamily 0 group B member 2                     | 4,568 | ENS0000000221634  | mir-1276     | microRNA 1276                                                               |
| 1,249 | ENS0000000126368 | NR1D1    | nuclear receptor subfamily 1 group D member 1                     | 2,965 | ENS0000000221792  | mir-1282     | microRNA 1282                                                               |
| 1,974 | ENS0000000123358 | NR4A1    | nuclear receptor subfamily 4 group A member 1                     | 4,969 | ENS0000000207605  | mir-191      | microRNA 191                                                                |
| 1,052 | ENS0000000153234 | NR4A2    | nuclear receptor subfamily 4 group A member 2                     | 4,33  | ENS0000000207614  | mir-193      | microRNA 193a                                                               |
| 1,869 | ENS0000000159835 | NRARP    | NOTCH-regulated ankyrin repeat protein                            | 5,977 | ENS0000000207624  | mir-194      | microRNA 194-1                                                              |
| 1,08  | ENS0000000091129 | NRCAM    | neuronal cell adhesion molecule                                   | 4,494 | ENS0000000199038  | mir-210      | microRNA 210                                                                |
| 1,378 | ENS0000000157168 | NRG1     | neuregulin 1                                                      | 7,178 | ENS0000000207808  | mir-27       | microRNA 27a                                                                |
| 1,199 | ENS0000000180530 | NRIP1    | nuclear receptor interacting protein 1                            | 2,947 | ENS0000000264397  | mir-3180     | microRNA 3180-3                                                             |
| 1,014 | ENS0000000147548 | NSD3     | nuclear receptor binding SET domain protein 3                     | 5,542 | ENS0000000199053  | mir-324      | microRNA 324                                                                |
| 1,537 | ENS0000000179299 | NSUN7    | NOP2/Sun RNA methyltransferase family member 7                    | 3,98  | ENS0000000199023  | mir-339      | microRNA 339                                                                |
| 1,044 | ENS0000000074527 | NTN4     | netrin 4                                                          | 4,007 | ENS0000000264462  | mir-3648     | microRNA 3648-1                                                             |
| 4,455 | ENS0000000163545 | NUAK2    | NUAK family class 2                                               | 2,354 | ENS00000002107635 | mir-499      | microRNA 499                                                                |
| 1,207 | ENS0000000108256 | NUPF2    | NUPF2, FMRL interacting protein 2                                 | 4,359 | ENS0000000207925  | mir-515      | microRNA 520c                                                               |
| 1,511 | ENS0000000137497 | NUMA1    | nuclear mitotic apparatus protein 1                               | 6,748 | ENS0000000207716  | mir-572      | microRNA 572                                                                |
| 1,372 | ENS0000000137804 | NUSAP1   | nucleolar and spindle associated protein 1                        | 5,162 | ENS0000000207756  | mir-580      | microRNA 580                                                                |
| 1,334 | ENS0000000162231 | NXF1     | nuclear RNA export factor 1                                       | 3,655 | ENS0000000207952  | mir-624      | microRNA 624                                                                |
| 1,049 | ENS0000000167693 | NXN      | nucleoredoxin                                                     | 4,711 | ENS0000000207961  | mir-635      | microRNA 635                                                                |
| 1,601 | ENS0000000124006 | OBSL1    | obscurin like 1                                                   | 2,822 | ENS0000000212288  | mir-663      | microRNA 663a                                                               |
| 1,142 | ENS0000000122417 | ODF2L    | outer dense fiber of sperm tails 2 like                           | 5,46  | ENS0000000198976  | mir-8        | microRNA 200c                                                               |
| 1,332 | ENS0000000046651 | OFD1     | OFD1, centriole and centriolar satellite protein                  | 1,022 | ENS0000000234883  | MIR155HG     | MIR155 host gene                                                            |
| 1,627 | ENS0000000173391 | OLR1     | oxidized low density                                              |       |                   |              |                                                                             |

|       |                 |           |                                                                      |       |                 |          |                                                                                                     |
|-------|-----------------|-----------|----------------------------------------------------------------------|-------|-----------------|----------|-----------------------------------------------------------------------------------------------------|
| 1,146 | ENSG00000186472 | PCLO      | piccolo presynaptic cytomatrix protein                               | 2,211 | ENSG00000163132 | MSX1     | msh homeobox 1                                                                                      |
| 1,002 | ENSG00000183036 | PCRA      | Purkinje cell protein 4                                              | 1,196 | ENSG00000100330 | MTMR3    | myotubularin related protein 3                                                                      |
| 1,059 | ENSG00000138735 | PDE5A     | phosphodiesterase 5A                                                 | 1,308 | ENSG00000256618 | MTNR2L1  | MT-RNR2-like 1                                                                                      |
| 1,205 | ENSG00000160191 | PDE5B     | phosphodiesterase 5B                                                 | 1,189 | ENSG00000255845 | MTNR2L10 | MT-RNR2-like 10                                                                                     |
| 1,434 | ENSG00000145431 | PDGFC     | platelet derived growth factor C                                     | 1,293 | ENSG00000271043 | MTNR2L2  | MT-RNR2-like 2                                                                                      |
| 1,292 | ENSG00000170962 | PDGFD     | platelet derived growth factor D                                     | 1,195 | ENSG00000255823 | MTNR2L8  | MT-RNR2-like 8                                                                                      |
| 1,607 | ENSG00000164951 | PDP1      | pyruvate dehydrogenase phosphatase catalytic subunit 1               | 1,849 | ENSG00000185499 | MUC1     | mucin 1, cell surface associated                                                                    |
| 1,008 | ENSG00000196996 | PDXDC2P-N | nuclear pore complex-interacting protein                             | 1,409 | ENSG00000176945 | MUC20    | mucin 20, cell surface associated                                                                   |
| 1,5   | ENSG0000017267  | PDZD3     | PDZ domain containing 3                                              | 1,066 | ENSG00000117983 | MUC5B    | mucin 5B, oligomeric mucus/gel-forming                                                              |
| 1,121 | ENSG00000165650 | PDZD8     | PDZ domain containing 8                                              | 2,877 | ENSG00000184956 | MUC6     | mucin 6, oligomeric mucus/gel-forming                                                               |
| 1,071 | ENSG00000162366 | PDXR1P1   | PDZK1 interacting protein 1                                          | 1,754 | ENSG0000017502  | MU1M11   | MU1M1 like 1                                                                                        |
| 1,572 | ENSG00000242265 | PEG10     | paternally expressed 10                                              | 1,064 | ENSG00000113364 | MVP      | major vault protein                                                                                 |
| 1,307 | ENSG00000197329 | PEU1      | pellino E3 ubiquitin protein ligase 1                                | 2,746 | ENSG00000059728 | MXD1     | MAX dimerization protein 1                                                                          |
| 1,419 | ENSG00000179094 | PER1      | period circadian clock 1                                             | 3,075 | ENSG00000179820 | MYADM    | myeloid associated differentiation marker                                                           |
| 1,837 | ENSG00000132326 | PER2      | period circadian clock 2                                             | 1,135 | ENSG00000132382 | MYBBP1A  | MYB binding protein 1a                                                                              |
| 1,814 | ENSG00000109272 | PF-A1     | platelet factor 4 variant 1                                          | 3,108 | ENSG00000136997 | MYC      | MYC proto-oncogene, bHLH transcription factor                                                       |
| 1,103 | ENSG00000178924 | PFAS      | phosphoribosylformylglycinamide synthase                             | 1,523 | ENSG00000104177 | MYEF2    | myosin expression factor 2                                                                          |
| 2,111 | ENSG00000170525 | PKFB3     | 6-phosphofructo-2-kinase/fructose-2,6-bisphosphatase 3               | 1,601 | ENSG00000105357 | MYH14    | myosin heavy chain 14                                                                               |
| 1,442 | ENSG00000067057 | PKPK      | phosphofruktokinase, platelet                                        | 2,383 | ENSG00000100345 | MYH9     | myosin heavy chain 9                                                                                |
| 4,017 | ENSG00000099688 | PGC       | progesterin                                                          | 2,1   | ENSG00000007944 | MYLP     | myosin regulatory light chain interacting protein                                                   |
| 2,25  | ENSG00000142102 | PGGHG     | protein-glucosylgalactosylhydroxylase glucosidase                    | 2,094 | ENSG00000145555 | MYO10    | myosin X                                                                                            |
| 1,078 | ENSG00000165434 | PHOX2L1   | phosphoglucuronatase 1                                               | 1,284 | ENSG00000197879 | MYO1C    | myosin IC                                                                                           |
| 1,104 | ENSG00000204138 | PHACTR4   | phosphatase and actin regulator 4                                    | 1,574 | ENSG0000017483  | MYO1E    | myosin IE                                                                                           |
| 1,62  | ENSG00000111752 | PHC1      | polyhomeotic homolog 1                                               | 1,091 | ENSG00000095777 | MYO3A    | myosin IIIA                                                                                         |
| 1,179 | ENSG00000116273 | PHF13     | PHD finger protein 13                                                | 1,23  | ENSG00000167306 | MYO5B    | myosin VB                                                                                           |
| 1,103 | ENSG00000146247 | PHP       | pleckstrin homology domain interacting protein                       | 1,142 | ENSG00000128833 | MYO5C    | myosin VC                                                                                           |
| 2,794 | ENSG00000181649 | PHLDA2    | pleckstrin homology like domain family A member 2                    | 1,448 | ENSG00000196586 | MYO6     | myosin VI                                                                                           |
| 1,032 | ENSG00000183506 | PI4KAP2   | phosphatidylinositol 4-kinase alpha pseudogene 2                     | 1,424 | ENSG00000138119 | MYOF     | myoferlin                                                                                           |
| 1,352 | ENSG00000135213 | PIEZO1    | piezo type 1 mechanosensitive ion channel component 1                | 1,308 | ENSG00000253155 | MYOZP    | myosin zonalis adhersens protein                                                                    |
| 1,671 | ENSG00000162896 | PIGB      | polymeric immunoglobulin receptor                                    | 1,473 | ENSG00000209326 | MZF1     | myeloid zinc finger 1                                                                               |
| 1,547 | ENSG00000121716 | PILRB     | paired immunoglobulin-like type 2 receptor beta                      | 1,936 | ENSG00000145911 | N4BP3    | NEDD4 binding protein 3                                                                             |
| 1,718 | ENSG00000137193 | PIM1      | Pim-1 proto-oncogene, serine/threonine kinase                        | 1,543 | ENSG00000172766 | NAAL16   | N(alpha)-acetyltransferase 16, NATA auxiliary subunit                                               |
| 1,653 | ENSG00000198355 | PIM3      | Pim-3 proto-oncogene, serine/threonine kinase                        | 1,427 | ENSG00000176994 | NAALADL2 | N-acetylated alpha-linked acidic dipeptidase like 2                                                 |
| 1,176 | ENSG00000143398 | PIP5K1A   | phosphatidylinositol-4-phosphate 5-kinase type 1 alpha               | 1,398 | ENSG00000160796 | NBEAL2   | neurobeachin like 2                                                                                 |
| 1,089 | ENSG00000241878 | PISD      | phosphatidylserine decarboxylase                                     | 3,463 | ENSG00000144959 | NCEH1    | neutral cholesterol ester hydrolase 1                                                               |
| 1,592 | ENSG00000134627 | PIN1A     | pin1 like RNA-mediated gene silencing 4                              | 1,865 | ENSG00000071051 | NCK2     | NCK adaptor protein 2                                                                               |
| 1,076 | ENSG00000181191 | PIA1      | praja ring finger ubiquitin ligase 1                                 | 1,426 | ENSG00000115053 | NCL      | nucleolin                                                                                           |
| 1,15  | ENSG00000080710 | PKD1      | polycystin 1, transient receptor potential channel interacting       | 2,831 | ENSG00000111912 | NCOA7    | nuclear receptor coactivator 7                                                                      |
| 1,906 | ENSG00000170927 | PKHD1     | PKHD1, fibrocystin/polyductin                                        | 1,037 | ENSG00000166579 | NDEL1    | nucleo development protein 1 like 1                                                                 |
| 1,535 | ENSG00000184363 | PKP3      | plakophilin 3                                                        | 1,659 | ENSG00000245532 | NEAT1    | nuclear paraspeckle assembly transcript 1 (non-protein coding)                                      |
| 1,621 | ENSG00000243708 | PLAZ2GB   | phospholipase A2 group IVB                                           | 1,056 | ENSG00000110400 | NECTIN1  | nectin cell adhesion molecule 1                                                                     |
| 1,281 | ENSG00000134581 | PLAZG5    | phospholipase A2 group VI                                            | 1,331 | ENSG00000130302 | NECTIN2  | nectin cell adhesion molecule 2                                                                     |
| 1,007 | ENSG00000126003 | PLAIG2    | PLAIG1 like zinc finger 2                                            | 2,062 | ENSG00000143217 | NECTIN4  | nectin cell adhesion molecule 4                                                                     |
| 2,616 | ENSG00000114222 | PLAUR     | plasminogen activator, urokinase receptor                            | 2,944 | ENSG00000049759 | NEDD4L   | neural precursor cell expressed, developmentally down-regulated 4-like, E3 ubiquitin protein ligase |
| 1,36  | ENSG00000161714 | PLCD3     | phospholipase C delta 3                                              | 3,174 | ENSG00000111859 | NEDD9    | neural precursor cell expressed, developmentally down-regulated 9                                   |
| 1,233 | ENSG00000129219 | PLD2      | phospholipase D2                                                     | 1,175 | ENSG00000163491 | NEK10    | NIMA related kinase 10                                                                              |
| 1,009 | ENSG00000143850 | PLEKHA6   | pleckstrin homology domain containing A6                             | 1,347 | ENSG00000173848 | NET1     | neuropathetic cell transforming 1                                                                   |
| 1,432 | ENSG00000156689 | PLEKH7A   | pleckstrin homology domain containing A7                             | 1,251 | ENSG00000131218 | NEUB3    | neuronal E3 ubiquitin protein ligase 3                                                              |
| 2,222 | ENSG00000201300 | PLEKH81   | pleckstrin homology domain containing B1                             | 1,798 | ENSG00000102908 | NFAT5    | nuclear factor of activated T-cells 5                                                               |
| 1,372 | ENSG00000126822 | PLEKHG3   | pleckstrin homology and RhoGEF domain containing G3                  | 2,836 | ENSG00000131196 | NFATC1   | nuclear factor of activated T-cells 1                                                               |
| 1,64  | ENSG00000138233 | PLEKHG6   | pleckstrin homology and RhoGEF domain containing G6                  | 2,02  | ENSG00000101096 | NFATC2   | nuclear factor of activated T-cells 2                                                               |
| 1,145 | ENSG00000214176 | PLEKHM1P1 | pleckstrin homology and RUN domain containing M1 pseudogene 1        | 1,636 | ENSG00000105034 | NFE2L3   | nuclear factor, erythroid 2 like 3                                                                  |
| 2,922 | ENSG00000145632 | PLK2      | polo like kinase 2                                                   | 1,47  | ENSG00000165030 | NFIL3    | nuclear factor, interleukin 3 regulated                                                             |
| 1,553 | ENSG00000173845 | PLK3      | polo like kinase 3                                                   | 2,438 | ENSG00000109320 | NFKB1    | nuclear factor kappa B subunit 1                                                                    |
| 1,086 | ENSG00000102934 | PLP       | plasmalogen                                                          | 2,103 | ENSG00000077150 | NFKB2    | nuclear factor kappa B subunit 2                                                                    |
| 2,077 | ENSG00000141934 | PLPP2     | phospholipid phosphatase 2                                           | 1,9   | ENSG00000167604 | NFKBID   | NFKB inhibitor delta                                                                                |
| 1,927 | ENSG00000164050 | PLXNB1    | plexin B1                                                            | 1,836 | ENSG00000146232 | NFKBIE   | NFKB inhibitor epsilon                                                                              |
| 1,011 | ENSG00000196576 | PLXNB2    | plexin B2                                                            | 3,786 | ENSG00000144802 | NFKBIZ   | NFKB inhibitor zeta                                                                                 |
| 4,301 | ENSG00000141682 | PMAP1F    | phorbol-12-myristate-13-acetate-induced protein 1                    | 1,045 | ENSG00000170322 | NFRKB    | nuclear factor related to kappaB binding protein                                                    |
| 2,268 | ENSG00000124225 | PMEPFA1   | prostate transmembrane protein, androgen induced 1                   | 1,59  | ENSG00000001167 | NFYA     | nuclear transcription factor Y subunit alpha                                                        |
| 1,332 | ENSG00000124254 | PNKR      | PNK interacting serine and arginine rich protein                     | 1,163 | ENSG00000164190 | NFKB3    | NFKB, cohesin loading factor                                                                        |
| 1,206 | ENSG00000100941 | PNN       | pinin, desmosome associated protein                                  | 1,595 | ENSG00000167034 | NKX3-1   | NKX3 homeobox 1                                                                                     |
| 1,4   | ENSG00000177666 | PNPLA2    | patatin like phospholipase domain containing 2                       | 1,161 | ENSG00000165246 | NLGN4Y   | neuroligin 4, Y-linked                                                                              |
| 1,39  | ENSG00000146278 | PNRC1     | proline rich nuclear receptor coactivator 1                          | 1,108 | ENSG00000197696 | NMB      | neuromedin B                                                                                        |
| 1,508 | ENSG00000124429 | POF1B     | premature ovarian failure, 18                                        | 1,826 | ENSG00000112981 | NME5     | NME/NM23 family member 5                                                                            |
| 1,225 | ENSG00000143442 | POG2      | pogo transposable element derived with ZNF domain                    | 1,827 | ENSG00000151014 | NOCT     | nocturnin                                                                                           |
| 1,655 | ENSG00000181222 | POLR2A    | RNA polymerase II subunit A                                          | 1,317 | ENSG00000165197 | NOLC1    | nuclear and cold-inducible body phosphoprotein 1                                                    |
| 1,099 | ENSG00000099830 | POMT2     | protein O-mannosyltransferase 2                                      | 1,185 | ENSG00000138847 | NOXA1    | NADPH oxidase activator 1                                                                           |
| 1,055 | ENSG00000137709 | POU2F3    | POU class 2 homeobox 3                                               | 1,122 | ENSG00000170485 | NPAS2    | neuronal PAS domain protein 2                                                                       |
| 1,559 | ENSG00000185668 | POU3F1    | POU class 3 homeobox 1                                               | 3,174 | ENSG00000141458 | NPCL1    | NPC intracellular cholesterol transporter 1                                                         |
| 1,233 | ENSG00000106536 | POU6F2    | POU class 6 homeobox 2                                               | 1,104 | ENSG00000215440 | NPEPL1   | aminopeptidase-like 1                                                                               |
| 1,221 | ENSG00000112033 | PPARAD    | peroxisome proliferator activated receptor delta                     | 1,367 | ENSG00000141279 | NPEPP5   | aminopeptidase pyromycin sensitive                                                                  |
| 2,242 | ENSG00000118898 | PPP1      | protein phosphatase 1                                                | 1,138 | ENSG00000131697 | NPIPL1   | nephropilin 4                                                                                       |
| 1,059 | ENSG00000170836 | PPM1D     | protein phosphatase, Mg <sup>2+</sup> /Mn <sup>2+</sup> dependent 1D | 1,317 | ENSG00000138426 | NPIP7    | (includ nuclear pore complex interacting protein family member A7                                   |
| 1,593 | ENSG00000088808 | PPP1R13B  | protein phosphatase 1 regulatory subunit 13B                         | 1,6   | ENSG00000169246 | NPIP8    | (includ nuclear pore complex interacting protein family member B4                                   |
| 2,1   | ENSG00000104881 | PPP1R13L  | protein phosphatase 1 regulatory subunit 13 like                     | 1,799 | ENSG00000168743 | NPNT     | nephromectin                                                                                        |
| 4,549 | ENSG00000080704 | PPP1R15A  | protein phosphatase 1 regulatory subunit 15A                         | 1,215 | ENSG00000163273 | NPPC     | natriuretic peptide C                                                                               |
| 1,493 | ENSG00000158615 | PPP1R15B  | protein phosphatase 1 regulatory subunit 15B                         | 2,143 | ENSG00000106236 | NPTX2    | neuronal pentraxin 2                                                                                |
| 1,592 | ENSG00000196422 | PPP1R26   | protein phosphatase 1 regulatory subunit 26                          | 1,56  | ENSG00000110982 | NR6B2    | nuclear receptor subfamily 1 group B member 2                                                       |
| 1,147 | ENSG00000158528 | PPP1R9A   | protein phosphatase 1 regulatory subunit 9A                          | 1,35  | ENSG00000126368 | NR1D1    | nuclear receptor subfamily 1 group D member 1                                                       |
| 1,139 | ENSG00000156475 | PPP2R2B   | protein phosphatase 2 regulatory subunit Bbeta                       | 2,114 | ENSG00000123358 | NR4A1    | nuclear receptor subfamily 4 group A member 1                                                       |
| 1,103 | ENSG00000124224 | PPP4R1L   | protein phosphatase 4 regulatory subunit 1 like (pseudogene)         | 1,266 | ENSG00000153234 | NR4A2    | nuclear receptor subfamily 4 group A member 2                                                       |
| 1,775 | ENSG00000148840 | PPRC1     | peroxisome proliferator-activated receptor gamma, coactivator-rela   | 2,073 | ENSG00000198435 | NRARP    | NOTCH-regulated ankyrin repeat protein                                                              |
| 1,148 | ENSG00000196850 | PTC7      | PTC7 protein phosphatase homolog                                     | 1,029 | ENSG00000106459 | NRP1     | nuclear respiratory factor 1                                                                        |
| 1,622 | ENSG00000139174 | PRICKLE1  | prickle planar cell polarity protein 1                               | 1,179 | ENSG00000157168 | NRG1     | neuregulin 1                                                                                        |
| 1,046 | ENSG00000124593 | PRICKLE4  | prickle planar cell polarity protein 4                               | 2,954 | ENSG00000180530 | NRP1     | nuclear receptor interacting protein 1                                                              |
| 1,04  | ENSG00000162409 | PRKAA2    | protein kinase AMP-activated catalytic subunit alpha 2               | 1,123 | ENSG00000179299 | NSUN7    | NOP2/58S RNA methyltransferase family member 7                                                      |
| 1,206 | ENSG00000163932 | PRKCD     | protein kinase C delta                                               | 1,263 | ENSG00000111696 | NTSDC3   | 5'-nucleotidase domain containing 3                                                                 |
| 1,049 | ENSG00000105287 | PRKDD     | protein kinase D2                                                    | 1,065 | ENSG00000074527 | NTNA     | netrin 4                                                                                            |
| 2,385 | ENSG00000007062 | PROM1     | prominin 1                                                           | 4,222 | ENSG00000163545 | NUAK2    | NUAK family kinase 2                                                                                |
| 1,413 | ENSG00000110844 | PRPF40B   | pre-mRNA processing factor 40 homolog B                              | 1,352 | ENSG00000108256 | NUPR2    | NUPR2, FMR1 interacting protein 2                                                                   |
| 1,124 | ENSG00000131188 | PRK7      | proline rich 7, synaptin                                             | 1,486 | ENSG00000137497 | NUPA41   | nuclear mitotic apparatus protein 1                                                                 |
| 1,124 | ENSG00000130723 | PRRC2B    | proline rich coiled-coil 2B                                          | 1,222 | ENSG00000124789 | NUP153   | nucleoporin 153                                                                                     |
| 1,236 | ENSG00000117523 | PRRC2C    | proline rich coiled-coil 2C                                          | 1,234 | ENSG00000095319 | NUP188   | nucleoporin 188                                                                                     |
| 3,412 | ENSG00000005001 | PRSS22    | protease, serine 22                                                  | 1,623 | ENSG00000110713 | NUP98    | nucleoporin 98                                                                                      |
| 1,771 | ENSG00000206549 | PRSS50    | protease, serine 50                                                  | 1,671 | ENSG00000137804 | NSAP1    | nuclear and spindle associated protein 1                                                            |
| 2,032 | ENSG00000052344 | PRSS8     | protease, serine 8                                                   | 1,469 | ENSG00000162231 | NXP1     | nuclear RNA export factor 1                                                                         |
| 1,399 | ENSG00000125650 | PSFN      | poly(pyrimidine) tract binding protein 1                             | 1,535 | ENSG00000124096 | OSB1     | obscure like 1                                                                                      |
| 1,086 | ENSG00000113004 | PTBP1     | polypyrimidine tract binding protein 1                               | 1,377 | ENSG00000115758 | ODC1     | ornithine decarboxylase 1                                                                           |
| 1,029 | ENSG00000117569 | PTBP2     | polypyrimidine tract binding protein 2                               | 1,552 | ENSG00000046651 | OFD1     | OFD1, centriole and centriolar satellite protein                                                    |
| 1,442 | ENSG00000244694 | PTCHD4    | patched domain containing 4                                          | 2,376 | ENSG00000173391 | OLR1     | oxidized low density lipoprotein receptor 1                                                         |
| 1,272 | ENSG00000122420 | PTGFR     | prostaglandin F receptor                                             | 1,752 | ENSG00000169856 | ONEUC1   | one cut homeobox 1                                                                                  |
| 1,262 | ENSG00000134247 | PTGFRN    | prostaglandin F2 receptor inhibitor                                  | 1,433 | ENSG00000079482 | OPHN1    | oligophrenin 1                                                                                      |
| 2,333 | ENSG00000087894 | PTH1L     | parathyroid hormone like hormone                                     | 1,037 | ENSG00000070882 | OSBP3    | oxysterol binding protein like 3                                                                    |
| 1,41  | ENSG00000163629 | PTPN13    | protein tyrosine phosphatase, non-receptor type 13                   | 1,272 | ENSG00000164823 | OSGIN2   | oxidative stress induced growth inhibitor family member 2                                           |
| 1,031 | ENSG00000151204 | PTPN14    | protein tyrosine phosphatase, non-receptor type 14                   | 1,719 | ENSG00000165312 | OTUD1    | OTU deubiquitinase 1                                                                                |
| 1,521 | ENSG00000153707 | PTPRD     | protein tyrosine phosphatase, receptor type D                        | 1,2   | ENSG00000169914 | OTUD3    | OTU deubiquitinase 3                                                                                |
| 1,025 | ENSG0           |           |                                                                      |       |                 |          |                                                                                                     |

|       |                  |            |                                                                      |       |                  |           |                                                                         |
|-------|------------------|------------|----------------------------------------------------------------------|-------|------------------|-----------|-------------------------------------------------------------------------|
| 2,469 | ENSG00000165105  | RASEF      | RAS and EF-hand domain containing                                    | 1,399 | ENSG00000165650  | PDZD8     | PDZ domain containing 8                                                 |
| 1,578 | ENSG00000107551  | RASF4      | Ras association domain family member 4                               | 1,061 | ENSG00000162366  | PDZK1IP1  | PDZK1 interacting protein 1                                             |
| 1,116 | ENSG00000169435  | RASF6      | Ras association domain family member 6                               | 1,369 | ENSG00000242265  | PEG10     | paternally expressed 10                                                 |
| 1,492 | ENSG00000123094  | RASF8      | Ras association domain family member 8                               | 1,928 | ENSG00000107329  | PEL1      | peelino E3 ubiquitin protein ligase 1                                   |
| 3,392 | ENSG00000198774  | RASF9      | Ras association domain family member 9                               | 1,112 | ENSG00000139946  | PEL2      | peelino E3 ubiquitin protein ligase family member 2                     |
| 1,112 | ENSG00000161847  | RAVER1     | ribonucleoprotein, PTB binding 1                                     | 1,252 | ENSG00000179094  | PER1      | period circadian clock 1                                                |
| 1,195 | ENSG00000162437  | RAVER2     | ribonucleoprotein, PTB binding 2                                     | 2,264 | ENSG00000132326  | PER2      | period circadian clock 2                                                |
| 1,791 | ENSG00000122257  | RBBP6      | RB binding protein 6, ubiquitin ligase                               | 1,538 | ENSG00000109272  | PF4V1     | platelet factor 4 variant 1                                             |
| 1,046 | ENSG00000101773  | RBBP8      | RB binding protein 8, endonuclease                                   | 3,227 | ENSG00000170525  | PKFBF3    | 6-phosphofructo-2-kinase/fructose 3-phosphofructokinase, platelet       |
| 1,097 | ENSG00000229306  | RBM14      | RNA binding motif protein 14                                         | 1,944 | ENSG00000067057  | PKFKP     | prokaryotic                                                             |
| 1,554 | ENSG00000162775  | RBM25      | RNA binding motif protein 25                                         | 1,318 | ENSG00000096088  | PGC       | progerin                                                                |
| 1,091 | ENSG00000122965  | RBM19      | RNA binding motif protein 19                                         | 2,374 | ENSG00000142102  | PGGHG     | protein-glucosylgalactosylhydroxylysine glucosidase                     |
| 1,053 | ENSG00000119707  | RBM25      | RNA binding motif protein 25                                         | 1,024 | ENSG00000204138  | PHACTR4   | phosphatase and actin regulator 4                                       |
| 1,549 | ENSG00000132819  | RBM38      | RNA binding motif protein 38                                         | 1,569 | ENSG00000111752  | PHC1      | polyhomeotic homolog 1                                                  |
| 1,283 | ENSG00000131051  | RBM39      | RNA binding motif protein 39                                         | 1,445 | ENSG00000116273  | PHF13     | PHD finger protein 13                                                   |
| 1,27  | ENSG00000045434  | RBM6       | RNA binding motif protein 6                                          | 1,09  | ENSG00000146247  | PHIP      | pleckstrin homology domain interacting protein                          |
| 1,112 | ENSG00000076657  | RBM22      | RNA binding motif single stranded interacting protein 2              | 1,821 | ENSG00000139289  | PHLOA1    | pleckstrin homology like domain family A member 1                       |
| 1,043 | ENSG000001057110 | RBPMS      | RNA binding protein with multiple splicing                           | 3,492 | ENSG00000181649  | PHLDA2    | pleckstrin homology like domain family A member 2                       |
| 1,198 | ENSG00000135870  | RC3H1      | ring finger and CCHC-type domains 1                                  | 1,126 | ENSG00000070047  | PHRF1     | PHD and ring finger domains 1                                           |
| 1,069 | ENSG00000179051  | RC2        | regulator of chromosome condensation 2                               | 1,674 | ENSG00000103335  | PIEZO1    | piezo type mechanosensitive ion channel component 1                     |
| 2,105 | ENSG00000100918  | REC        | REC8 meiotic recombination protein                                   | 1,037 | ENSG00000174227  | PIGG      | phosphatidylinositol glycan anchor biosynthesis class G                 |
| 1,936 | ENSG00000162924  | REL        | RELB proto-oncogene, NF- $\kappa$ B subunit                          | 1,667 | ENSG00000162896  | PIGR      | polymeric immunoglobulin receptor                                       |
| 1,721 | ENSG00000104856  | RELB       | RELB proto-oncogene, NF- $\kappa$ B subunit                          | 1,118 | ENSG00000121879  | PIK3CA    | phosphatidylinositol-4,5-bisphosphate 3-kinase catalytic subunit alpha  |
| 1,525 | ENSG00000139890  | REM2       | RRAD and GEM like GTPase 2                                           | 1,31  | ENSG00000121716  | PLR8      | paired immunoglobulin-like type 2 receptor beta                         |
| 1,089 | ENSG00000142599  | RERE       | arginine-glutamic acid dipeptide repeats                             | 1,925 | ENSG00000137193  | PIM1      | Pim-1 proto-oncogene, serine/threonine kinase                           |
| 1,173 | ENSG00000223638  | RFLP4A/RFF | ret finger protein like 4A                                           | 1,839 | ENSG00000198355  | PIM3      | Pim-3 proto-oncogene, serine/threonine kinase                           |
| 1,678 | ENSG000000087903 | RFK2       | regulatory factor K2                                                 | 1,703 | ENSG00000143398  | PIPSK1A   | phosphatidylinositol-4-phosphate 5-kinase type 1 alpha                  |
| 1,783 | ENSG00000205517  | RGL3       | ral guanine nucleotide dissociation stimulating like 3               | 1,011 | ENSG00000167103  | PIPSK1L   | phosphatidylinositol-4-phosphate 5-kinase like 1                        |
| 1,599 | ENSG00000169629  | RGNP4      | RANBP1-like and GTP domain containing 5                              | 1,285 | ENSG00000141878  | PISD      | phosphatidylinositol decarboxylase                                      |
| 1,148 | ENSG000000991844 | RGL57      | regulator of G protein signaling 17                                  | 1,679 | ENSG00000134627  | PIMW4     | piwi like RNA-mediated gene silencing 4                                 |
| 2,87  | ENSG00000117152  | RGS4       | regulator of G protein signaling 4                                   | 1,261 | ENSG00000181191  | PIA1      | praja ring finger ubiquitin ligase 1                                    |
| 1,711 | ENSG000000007384 | RHBD1F     | rhomboid 5 homolog 1                                                 | 1,064 | ENSG000000008710 | PKD1      | polycystin 1, transient receptor potential channel interacting          |
| 1,634 | ENSG00000129667  | RHBD2F     | rhomboid 5 homolog 2                                                 | 1,595 | ENSG00000170927  | PKHD1     | PKHD1, fibrocytin/polyductin                                            |
| 1,676 | ENSG00000158315  | RHBDL2     | rhomboid like 2                                                      | 1,458 | ENSG00000184363  | PKP3      | plakophilin 3                                                           |
| 1,695 | ENSG00000143878  | RHOB       | ras homolog family member B                                          | 1,412 | ENSG00000243708  | PLAGL3    | phospholipase A2 group IVB                                              |
| 1,009 | ENSG00000140983  | RHO2       | ras homolog family member T2                                         | 1,118 | ENSG00000184381  | PLAG2     | phospholipase A2 group VI                                               |
| 2,817 | ENSG00000101410  | RHOV       | ras homolog family member V                                          | 1,233 | ENSG00000126003  | PLAGL2    | PLAGL1 like zinc finger 2                                               |
| 1,746 | ENSG00000131941  | RHPN2      | rhophilin Rho GTPase binding protein 2                               | 3,487 | ENSG00000114422  | PLAUR     | plasminogen activator, urokinase receptor                               |
| 1,155 | ENSG00000166405  | RIC3       | RIC3 acetylcholine receptor chaperone                                | 1,965 | ENSG00000161714  | PLCD3     | phospholipase C delta 3                                                 |
| 1,711 | ENSG00000111785  | RIC8B      | RIC8 guanine nucleotide exchange factor B                            | 1,091 | ENSG00000182378  | PLCD1     | phosphatidylinositol specific phospholipase C X domain containing 1     |
| 1,963 | ENSG00000104312  | RIPK2      | receptor interacting serine/threonine kinase 2                       | 1,212 | ENSG00000129219  | PLD2      | phospholipase D2                                                        |
| 1,284 | ENSG00000183421  | RIPK4      | receptor interacting serine/threonine kinase 4                       | 1,544 | ENSG00000156689  | PLEKH7    | pleckstrin homology domain containing A7                                |
| 1,548 | ENSG00000117000  | RLF        | rearranged L-myc fusion                                              | 2     | ENSG00000121300  | PLEKH8    | 2                                                                       |
| 1,131 | ENSG00000172602  | RND1       | Rho family GTPase 1                                                  | 1,173 | ENSG00000157895  | PLEKH2    | pleckstrin homology and FYVE domain containing 2                        |
| 1,884 | ENSG000000034677 | RNF19A     | ring finger protein 19A, RBR E3 ubiquitin protein ligase             | 1,846 | ENSG00000126822  | PLEKH3    | pleckstrin homology and RhoGEF domain containing 3                      |
| 1,719 | ENSG00000165114  | RNF19B     | ring finger protein 19B                                              | 1,745 | ENSG000000008323 | PLEKH6    | pleckstrin homology and FYVE domain containing G6                       |
| 1,538 | ENSG00000158286  | RNF207     | ring finger protein 207                                              | 1,369 | ENSG00000214176  | PLEKHM1P1 | pleckstrin homology and RUN domain containing M1 pseudogene 1           |
| 1,113 | ENSG00000178211  | RNF213     | ring finger protein 213                                              | 1,241 | ENSG00000171513  | PLEKHW1   | pleckstrin homology domain containing N1                                |
| 1,03  | ENSG00000237330  | RNF223     | ring finger protein 223                                              | 3,356 | ENSG00000145632  | PLK2      | pole like kinase 2                                                      |
| 1,322 | ENSG00000108375  | RNF43      | ring finger protein 43                                               | 2,969 | ENSG00000173846  | PLK3      | pole like kinase 3                                                      |
| 1,116 | ENSG00000185946  | RNP3C      | RNA binding region (RNP1, RRM) containing 3                          | 1,153 | ENSG00000102934  | PLP       | plasmolipin                                                             |
| 3,754 | ENSG00000166592  | RRAD       | RRAD, Ras related glycosyl transferase and calcium channel regulator | 1,896 | ENSG00000141934  | PLP2      | phospholipid phosphatase 2                                              |
| 1,47  | ENSG000000052749 | RRP12      | ribosomal RNA processing 12 homolog                                  | 1,788 | ENSG00000164050  | PLXN8     | plexin B1                                                               |
| 1,042 | ENSG00000102841  | RRTBP      | ribosomal RNA processing 7 homolog B, pseudogene                     | 1,195 | ENSG00000146281  | PMOD2     | peptide M20 domain containing 2                                         |
| 1,356 | ENSG00000160188  | RSPH1      | radial spoke head 1 homolog                                          | 4,651 | ENSG00000141682  | PMAIP1    | phorbol-12-myristate-13-acetate-induced protein 1                       |
| 1,054 | ENSG00000130363  | RSPH3      | radial spoke 3 homolog                                               | 2,495 | ENSG00000124225  | PMP2A     | prostate transmembrane protein, androgen induced 1                      |
| 1,259 | ENSG00000111011  | RSRC2      | arginine and serine rich coiled-coil 2                               | 1,034 | ENSG00000140464  | PML       | promyelocytic leukemia                                                  |
| 1,906 | ENSG00000117616  | RSRP1      | arginine and serine rich protein 1                                   | 1,193 | ENSG00000132424  | PNISR     | PNN interacting serine and arginine rich protein                        |
| 1,151 | ENSG00000185924  | RTN4R1     | reticulon 4 receptor like 1                                          | 1,186 | ENSG00000100941  | PNN       | protein, desmosome associated protein                                   |
| 1,156 | ENSG00000159216  | RUNX1      | run1 related transcription factor 1                                  | 1,442 | ENSG00000177666  | PNPLA2    | patatin like phospholipase domain containing 2                          |
| 1,026 | ENSG00000160583  | RUSC1      | RUN and SH3 domain containing 1                                      | 1,496 | ENSG00000146278  | PNR1      | proline nuclear receptor coactivator 1                                  |
| 2,041 | ENSG00000198853  | RUSC2      | RUN and SH3 domain containing 2                                      | 1,258 | ENSG00000124429  | POF1B     | premature ovarian failure, 18                                           |
| 1,323 | ENSG00000197747  | S100A10    | S100 calcium binding protein A10                                     | 1,119 | ENSG00000143157  | POGK      | pogo transposable element derived with KRAB domain                      |
| 1,258 | ENSG00000163191  | S100A11    | S100 calcium binding protein A11                                     | 1,446 | ENSG00000143442  | POG2      | pogo transposable element derived with ZNF domain                       |
| 1,736 | ENSG00000189334  | S100A14    | S100 calcium binding protein A14                                     | 1,136 | ENSG00000100227  | POLDIP3   | DNA polymerase delta interacting protein 3                              |
| 1,255 | ENSG00000188015  | S100A3     | S100 calcium binding protein A3                                      | 2,088 | ENSG00000181222  | POU2A2    | RNA polymerase II subunit A                                             |
| 1,703 | ENSG00000197556  | S100A6     | S100 calcium binding protein A6                                      | 1,382 | ENSG00000158495  | POU3D     | RNA polymerase III subunit D                                            |
| 1,34  | ENSG00000160633  | SABF8      | scaffold attachment factor 8                                         | 1,353 | ENSG00000137709  | POU2F3    | POU class 2 homeobox 3                                                  |
| 1,027 | ENSG00000130254  | SABF2      | scaffold attachment factor B2                                        | 1,681 | ENSG00000185668  | POU3F1    | POU class 3 homeobox 1                                                  |
| 1,169 | ENSG00000141858  | SAMD1      | sterile alpha motif domain containing 1                              | 1,172 | ENSG00000106536  | POU6F2    | POU class 6 homeobox 2                                                  |
| 1,182 | ENSG000000020577 | SAMD4A     | sterile alpha motif domain containing 4A                             | 2,181 | ENSG00000112033  | PPARD     | peroxisome proliferator activated receptor delta                        |
| 1,182 | ENSG00000205307  | SAP25      | SH3 associated protein 25                                            | 2,507 | ENSG00000118898  | PPL       | periplakin                                                              |
| 1,05  | ENSG00000102041  | SBP1       | SET binding factor 1                                                 | 1,212 | ENSG00000170336  | PP4ID     | protein phosphatase, Mg <sup>2+</sup> /Mn <sup>2+</sup> dependent 10    |
| 1,145 | ENSG00000188322  | SBK1       | SH3 domain binding kinase 1                                          | 1,819 | ENSG00000088808  | PPP1R13B  | protein phosphatase 1 regulatory subunit 13B                            |
| 1,054 | ENSG00000213079  | SCAF8      | SR-related CTD associated factor 8                                   | 2,097 | ENSG00000104881  | PPP1R13L  | protein phosphatase 1 regulatory subunit 13 like                        |
| 1,058 | ENSG00000140386  | SCAPER     | S-phase cyclin A associated protein in the ER                        | 4,954 | ENSG00000080704  | PPP1R15A  | protein phosphatase 1 regulatory subunit 15A                            |
| 1,55  | ENSG000002052010 | SCARNAS    | small Cajal body-specific RNA 5                                      | 1,678 | ENSG00000158615  | PPP1R15B  | protein phosphatase 1 regulatory subunit 15B                            |
| 4,481 | ENSG00000251733  | SCARNAS8   | small Cajal body-specific RNA 8                                      | 1,753 | ENSG00000196422  | PPP1R26   | protein phosphatase 1 regulatory subunit 26                             |
| 1,878 | ENSG00000145284  | SCDS       | scarboxyl-GAA diesterase 5                                           | 1,004 | ENSG00000155528  | PPP1R9A   | protein phosphatase 1 regulatory subunit 9A                             |
| 1,616 | ENSG00000097969  | SCGN       | secretoglycin, EF-hand calcium binding protein                       | 1,041 | ENSG00000113575  | PPP2CA    | protein phosphatase 2 catalytic subunit alpha                           |
| 1,528 | ENSG00000111319  | SCNN1A     | sodium channel epithelial 1 alpha subunit                            | 1,319 | ENSG00000154845  | PPP4R1    | protein phosphatase 4 regulatory subunit 1                              |
| 1,922 | ENSG00000136193  | SCRN1      | secernin 1                                                           | 2,848 | ENSG00000148840  | PPRC1     | peroxisome proliferator-activated receptor gamma, coactivator-related 1 |
| 2,981 | ENSG000000080293 | SECTR      | secretin receptor                                                    | 1,213 | ENSG00000196850  | PPTC7     | PTC7 protein phosphatase homolog                                        |
| 1,044 | ENSG00000124145  | SDCA       | syndecan 4                                                           | 1,175 | ENSG000001019485 | PRDM11    | PR/SET domain 11                                                        |
| 1,416 | ENSG00000132885  | SDHAP1     | succinate dehydrogenase complex flavoprotein subunit A pseudogene    | 1,225 | ENSG00000116731  | PRDM2     | PR/SET domain 2                                                         |
| 1,146 | ENSG00000215837  | SDHAP2     | succinate dehydrogenase complex flavoprotein subunit A pseudogene    | 1,104 | ENSG00000108851  | PRDM4     | PR/SET domain 4                                                         |
| 1,088 | ENSG00000214491  | SEC14L6    | SEC14 like lipid binding 6                                           | 1,357 | ENSG00000139174  | PRICKL1   | prickle planar cell polarity protein 1                                  |
| 1,519 | ENSG00000091490  | SEL1L3     | SEL1L family member 3                                                | 1,669 | ENSG00000163932  | PRKCD     | protein kinase C delta                                                  |
| 4,02  | ENSG000000007908 | SELE       | selectin E                                                           | 1,021 | ENSG00000163558  | PRKCI     | protein kinase C iota                                                   |
| 1,658 | ENSG00000170381  | SEMA3E     | semaphorin 3E                                                        | 2,255 | ENSG000001007062 | PROM1     | prominin 1                                                              |
| 1,686 | ENSG00000092421  | SEMA6A     | semaphorin 6A                                                        | 1,567 | ENSG00000138723  | PRR7      | proline rich 7, synaptic                                                |
| 1,332 | ENSG00000137872  | SEMA6D     | semaphorin 6D                                                        | 1,035 | ENSG00000180723  | PRKCB2    | protein kinase coiled-coil 2B                                           |
| 3,54  | ENSG00000197632  | SERPINE2   | serpin family B member 2                                             | 1,396 | ENSG00000117523  | PRKRC     | proline rich coiled-coil 2C                                             |
| 1,261 | ENSG00000170542  | SERPINB9   | serpin family B member 9                                             | 3,634 | ENSG000000050001 | PRSS22    | protease, serine 22                                                     |
| 2,277 | ENSG00000149257  | SERPINH1   | serpin family H member 1                                             | 1,24  | ENSG00000206549  | PRSS50    | protease, serine 50                                                     |
| 1,862 | ENSG00000197019  | SERTAD1    | SERTA domain containing 1                                            | 2,397 | ENSG000001052344 | PRSS8     | protease, serine 8                                                      |
| 1,964 | ENSG00000179833  | SERTAD2    | SERTA domain containing 2                                            | 1,256 | ENSG00000111304  | PTBP1     | polypyrimidine tract binding protein 1                                  |
| 1,049 | ENSG00000157665  | SERTAD3    | SERTA domain containing 3                                            | 1,441 | ENSG00000117569  | PTBP2     | polypyrimidine tract binding protein 2                                  |
| 1,534 | ENSG00000130766  | SESN2      | sestrin 2                                                            | 1,01  | ENSG00000244604  | PITCHD4   | patched domain containing 4                                             |
| 1,746 | ENSG00000174938  | SEZL2      | seizure related 6 homolog like 2                                     | 1,194 | ENSG00000134247  | PTGFRN    | prostaglandin F2 receptor inhibitor                                     |
| 1,177 | ENSG00000104897  | SF3A2      | splicing factor 3a subunit 2                                         | 1,323 | ENSG00000073756  | PTGS2     | prostaglandin-endoperoxide synthase 2                                   |
| 1,113 | ENSG00000198089  | SFN1       | SFI1 centrin binding protein                                         | 3,257 | ENSG00000087494  | PTHLH     | parathyroid hormone like hormone                                        |
| 2,669 | ENSG00000175793  | SFN        | stratifin                                                            | 1,198 | ENSG00000196396  | PTPN11    | protein tyrosine phosphatase, non-receptor type 1                       |
| 1,422 | ENSG00000116560  | SFRQ       | splicing factor proline and glutamine rich                           | 1,376 | ENSG00000103629  | PTPN13    | protein tyrosine phosphatase, non-receptor type 13                      |
| 2,381 | ENSG00000120057  | SFRP5      | secreted frizzled related protein 5                                  | 1,249 | ENSG00000152104  | PTPN14    | protein tyrosine phosphatase, non-receptor type 14                      |
| 2,729 | ENSG00000164023  | SGMS2      | sphingomyelin synthase 2                                             | 1,406 | ENSG00000153707  | PTPRD     | protein tyrosine phosphatase, receptor type D                           |
| 2,379 | ENSG00000163082  | SGPP2      | sphingosine-1-phosphate phosphatase 2                                | 1,078 |                  |           |                                                                         |

|       |                 |           |                                                                     |       |                  |               |                                                                           |
|-------|-----------------|-----------|---------------------------------------------------------------------|-------|------------------|---------------|---------------------------------------------------------------------------|
| 1,197 | ENSG00000183780 | SLC35F3   | solute carrier family 35 member F3                                  | 1,826 | ENSG00000181467  | RAP2B         | RAP2B, member of RAS oncogene family                                      |
| 1,301 | ENSG00000169507 | SLC38A11  | solute carrier family 38 member 11                                  | 1,108 | ENSG00000173166  | RAPH1         | Ras association (RalGDS/AF-6) and pleckstrin homology domain 1            |
| 1,667 | ENSG00000168003 | SLC3A2    | solute carrier family 3 member 2                                    | 1,701 | ENSG00000077092  | RARB          | retinoic acid receptor beta                                               |
| 1,313 | ENSG00000133065 | SLC41A1   | solute carrier family 41 member 1                                   | 1,835 | ENSG00000172849  | RARG          | retinoic acid receptor gamma                                              |
| 1,438 | ENSG00000143036 | SLC44A3   | solute carrier family 44 member 3                                   | 1,776 | ENSG00000155903  | RASA2         | RAS p21 protein activator 2                                               |
| 1,339 | ENSG00000114923 | SLC4A3    | solute carrier family 4 member 3                                    | 1,121 | ENSG00000111344  | RASAL1        | RAS protein activator like 1                                              |
| 2,101 | ENSG00000080493 | SLC4A4    | solute carrier family 4 member 4                                    | 1,133 | ENSG00000075391  | RASAL2        | RAS protein activator like 2                                              |
| 1,057 | ENSG00000033867 | SLC4A7    | solute carrier family 4 member 7                                    | 1,081 | ENSG00000108551  | RASD1         | ras related dexamethasone induced 1                                       |
| 1,66  | ENSG00000100170 | SLC5A1    | solute carrier family 5 member 1                                    | 3,365 | ENSG00000165105  | RASEF         | RAS and EF-hand domain containing                                         |
| 1,856 | ENSG00000117834 | SLC5A9    | solute carrier family 5 member 9                                    | 1,442 | ENSG00000126889  | RASGRP3       | RAS guanyl releasing protein 3                                            |
| 2,472 | ENSG00000174358 | SLC6A19   | solute carrier family 6 member 19                                   | 1,518 | ENSG00000107551  | RASSF4        | Ras association domain family member 4                                    |
| 1,141 | ENSG00000131389 | SLC6A6    | solute carrier family 6 member 6                                    | 1,25  | ENSG00000169435  | RASSF6        | Ras association domain family member 6                                    |
| 2,202 | ENSG00000139514 | SLC7A1    | solute carrier family 7 member 1                                    | 1,819 | ENSG00000123094  | RASSF8        | Ras association domain family member 8                                    |
| 1,995 | ENSG00000103257 | SLC7A5    | solute carrier family 7 member 5                                    | 3,439 | ENSG00000198774  | RASSF9        | Ras association domain family member 9                                    |
| 2,005 | ENSG00000260727 | SLC7A5P1  | solute carrier family 7 member 5 pseudogene 1                       | 1,044 | ENSG00000162437  | RAVER2        | ribonucleoprotein, PTB binding 2                                          |
| 2,578 | ENSG00000258186 | SLC7A5P2  | solute carrier family 7 member 5 pseudogene 2                       | 2,076 | ENSG00000122257  | RBBP6         | RB binding protein 6, ubiquitin ligase                                    |
| 1,425 | ENSG00000090220 | SLC9A1    | solute carrier family 9 member A1                                   | 1,449 | ENSG00000144462  | RBM12         | RNA binding motif protein 12                                              |
| 1,441 | ENSG00000066230 | SLC9A3    | solute carrier family 9 member A3                                   | 1,315 | ENSG00000239306  | RBM14         | RNA binding motif protein 14                                              |
| 1,055 | ENSG00000180251 | SLC9A4    | solute carrier family 9 member A4                                   | 1,468 | ENSG00000162775  | RBM15         | RNA binding motif protein 15                                              |
| 1,303 | ENSG00000174663 | SLC9A1    | solute carrier organic anion transporter family member 3A1          | 1,137 | ENSG00000122965  | RBM19         | RNA binding motif protein 19                                              |
| 1,719 | ENSG00000154760 | SLFN13    | schlafen family member 13                                           | 1,113 | ENSG00000119707  | RBM25         | RNA binding motif protein 25                                              |
| 1,72  | ENSG00000166949 | SMAD3     | SMAD family member 3                                                | 1,608 | ENSG00000132819  | RBM38         | RNA binding motif protein 38                                              |
| 1,888 | ENSG00000127616 | SMARCA4   | SMN/SMN related, matrix associated, actin dependent regulator of ct | 1,468 | ENSG00000131051  | RCN39         | RNA binding motif protein 39                                              |
| 3,569 | ENSG00000172062 | SMN1/SMN  | survival of motor neuron 1, telomeric                               | 1,128 | ENSG00000163694  | RCM47         | RNA binding motif protein 47                                              |
| 2,194 | ENSG00000088826 | SMDX      | spermine oxidase                                                    | 1,305 | ENSG00000004534  | RBM6          | RNA binding motif protein 6                                               |
| 1,598 | ENSG00000130356 | SMPD3     | sphingomyelin phosphodiesterase 3                                   | 1,143 | ENSG00000076067  | RBMS2         | RNA binding motif single stranded interacting protein 2                   |
| 1,679 | ENSG00000130768 | SMPDL3B   | sphingomyelin phosphodiesterase acid like 3B                        | 1,34  | ENSG00000157110  | RBPMS         | RNA binding protein with multiple splicing                                |
| 1,634 | ENSG00000198742 | SMURF1    | SMAD specific E3 ubiquitin protein ligase 1                         | 1,277 | ENSG00000135870  | RC3H1         | ring finger and CCHH-type domains 1                                       |
| 1,412 | ENSG00000132639 | SNAP25    | synaptosome associated protein 25                                   | 1,031 | ENSG00000179051  | RCC2          | regulator of chromosome condensation 2                                    |
| 1,062 | ENSG00000197899 | SNHG12    | small nuclear RNA host gene 12                                      | 1,002 | ENSG00000089902  | RCOR1         | REST corepressor 1                                                        |
| 1,123 | ENSG00000234912 | SNHG20    | small nuclear RNA host gene 20                                      | 1,881 | ENSG00000100918  | RC8           | RC8 meiotic recombination protein                                         |
| 1,569 | ENSG00000163877 | SNIP1     | Smad nuclear interacting protein 1                                  | 2,334 | ENSG00000162924  | REL           | REL proto-oncogene, NF-kB subunit                                         |
| 5,44  | ENSG00000206811 | SNORA10   | small nuclear RNA, H/ACA box 10                                     | 1,077 | ENSG00000173039  | RELA          | RELA proto-oncogene, NF-kB subunit                                        |
| 7,427 | ENSG00000206910 | SNORA29   | small nuclear RNA, H/ACA box 29                                     | 2,099 | ENSG00000104856  | RELB          | RELB proto-oncogene, NF-kB subunit                                        |
| 3,876 | ENSG00000202612 | SNORA2A   | small nuclear RNA, H/ACA box 2A                                     | 1,707 | ENSG00000054967  | RELT          | RELT, TNF receptor                                                        |
| 4,478 | ENSG00000207913 | SNORA2B   | small nuclear RNA, H/ACA box 2B                                     | 1,707 | ENSG00000139890  | RENA2         | RRAD and GEM like GTPase 2                                                |
| 5,76  | ENSG00000199785 | SNORA52   | small nuclear RNA, H/ACA box 52                                     | 1,049 | ENSG00000092871  | RFFL          | ring finger and FYVE like domain containing E3 ubiquitin protein ligase   |
| 1,216 | ENSG00000212443 | SNORA53   | small nuclear RNA, H/ACA box 53                                     | 1,312 | ENSG00000223638  | RFPPLA/RFPPL4 | ret finger protein like 4A                                                |
| 3,867 | ENSG00000206693 | SNORA56   | small nuclear RNA, H/ACA box 56                                     | 2,132 | ENSG000000087903 | RFK2          | regulatory factor X2                                                      |
| 2,131 | ENSG00000199266 | SNORA60   | small nuclear RNA, H/ACA box 60                                     | 1,285 | ENSG00000080298  | RFK3          | regulatory factor X3                                                      |
| 7,57  | ENSG00000207088 | SNORA7B   | small nuclear RNA, H/ACA box 7B                                     | 1,71  | ENSG00000205517  | RGL3          | rig guanine nucleotide dissociation stimulator like 3                     |
| 1,428 | ENSG00000202633 | SNORA80B  | small nuclear RNA, H/ACA box 80B                                    | 1,436 | ENSG00000193338  | RGRF4         | RRANBP1 like and GMP domain containing 5                                  |
| 3,059 | ENSG00000239183 | SNORA84   | small nuclear RNA, H/ACA box 84                                     | 1,553 | ENSG00000143333  | RGSI6         | regulator of G protein signaling 16                                       |
| 3,521 | ENSG00000238917 | SNORD10   | small nuclear RNA, C/D box 10                                       | 2,407 | ENSG00000091844  | RGSI7         | regulator of G protein signaling 17                                       |
| 8,337 | ENSG00000199753 | SNORD104  | small nuclear RNA, C/D box 104                                      | 2,373 | ENSG00000117152  | RGSA          | regulator of G protein signaling 4                                        |
| 2,796 | ENSG00000207014 | SNORD116  | small nuclear RNA, C/D box 116-3                                    | 2,07  | ENSG00000007384  | RHBDP1        | rhomboïd 5 homolog 1                                                      |
| 5,891 | ENSG00000239043 | SNORD127  | small nuclear RNA, C/D box 127                                      | 1,519 | ENSG00000129667  | RHBDP2        | rhomboïd 5 homolog 2                                                      |
| 7,638 | ENSG00000207445 | SNORD158  | small nuclear RNA, C/D box 158                                      | 1,096 | ENSG00000138315  | RHBD2         | rhomboïd 2                                                                |
| 5,671 | ENSG00000200530 | SNORD35B  | small nuclear RNA, C/D box 35B                                      | 1,263 | ENSG00000143878  | RHOA          | ras homolog family member B                                               |
| 5,249 | ENSG00000202093 | SNORD58C  | small nuclear RNA, C/D box 58C                                      | 1,336 | ENSG00000139725  | RHOF          | ras homolog family member F, filopodia associated                         |
| 6,486 | ENSG00000200482 | SNORD83A  | small nuclear RNA, C/D box 83A                                      | 2,761 | ENSG00000104140  | RHOV          | ras homolog family member V                                               |
| 1,719 | ENSG00000212283 | SNORD89   | small nuclear RNA, C/D box 89                                       | 1,027 | ENSG00000158106  | RHPN1         | rhophilin Rho GTPase binding protein 1                                    |
| 2,627 | ENSG00000221539 | SNORD99   | small nuclear RNA, C/D box 99                                       | 2,279 | ENSG00000131941  | RHPN2         | rhophilin Rho GTPase binding protein 2                                    |
| 1,253 | ENSG00000144028 | SNRNP200  | small nuclear ribonucleoprotein US subunit 200                      | 1,047 | ENSG00000165605  | RIC1          | RIC1 acetylcholine receptor chaperone                                     |
| 1,233 | ENSG00000104852 | SNRNP70   | small nuclear ribonucleoprotein U1 subunit 70                       | 1,451 | ENSG00000111785  | RICB8         | RIC8 guanine nucleotide exchange factor B                                 |
| 1,254 | ENSG00000159140 | SON       | SON DNA binding protein                                             | 1,017 | ENSG00000166532  | RIMK1B        | ribosomal modification protein rimK like family member B                  |
| 1,112 | ENSG00000198142 | SOWAHC    | sosondowah ankryrin repeat domain family member C                   | 2,284 | ENSG00000104312  | RIPK2         | receptor interacting serine/threonine kinase 2                            |
| 3,369 | ENSG00000124766 | SOX4      | SRY-box 4                                                           | 3,346 | ENSG00000183421  | RIPK4         | receptor interacting serine/threonine kinase 4                            |
| 1,021 | ENSG00000110693 | SOX6      | SRY-box 6                                                           | 2,056 | ENSG00000117000  | RIFM          | rearranged L-myc fusion                                                   |
| 3,199 | ENSG00000125398 | SOX9      | SRY-box 9                                                           | 1,026 | ENSG00000131263  | RJUN          | ring finger protein, LIM domain interacting                               |
| 2,095 | ENSG00000104450 | SPAG1     | sperm associated antigen 1                                          | 2,076 | ENSG00000165799  | RKASE7        | ribonuclease A family member 7                                            |
| 1,115 | ENSG00000182957 | SPATA13   | spmatogenesis associated 13                                         | 1,428 | ENSG00000172602  | RND1          | Rho family GTPase 1                                                       |
| 1,136 | ENSG00000152582 | SPEF2     | sperm flagellar 2                                                   | 2,325 | ENSG00000034677  | RNF19A        | ring finger protein 19A, RBR E3 ubiquitin protein ligase                  |
| 1,642 | ENSG00000065526 | SPEN      | spen family transcriptional repressor                               | 2,184 | ENSG00000116514  | RNF198        | ring finger protein 19B                                                   |
| 2,373 | ENSG00000176170 | SPHK1     | sphingosine kinase 1                                                | 1,463 | ENSG00000158286  | RNF207        | ring finger protein 207                                                   |
| 2,324 | ENSG00000166145 | SPHNT1    | serine peptidase inhibitor, Kunitz type 1                           | 1,938 | ENSG00000237330  | RNF223        | ring finger protein 223                                                   |
| 1,453 | ENSG00000157642 | SPHNT2    | serine peptidase inhibitor, Kunitz type 2                           | 1,278 | ENSG00000101236  | RNF24         | ring finger protein 24                                                    |
| 1,646 | ENSG00000183018 | SPNS2     | sphingolipid transporter 2                                          | 1,083 | ENSG00000137075  | RNF38         | ring finger protein 38                                                    |
| 1,615 | ENSG00000118785 | SPP1      | secreted phosphoprotein 1                                           | 1,014 | ENSG00000063978  | RNF4          | ring finger protein 4                                                     |
| 1,409 | ENSG00000005206 | SPPL2B    | signal peptide peptidase like 2B                                    | 1,004 | ENSG00000108375  | RNF43         | ring finger protein 43                                                    |
| 1,431 | ENSG00000171621 | SPSB1     | spia/ryanodine receptor domain and SOCS box containing 1            | 1,035 | ENSG00000223508  | RPL23AP3      | ribosomal protein L23a pseudogene 53                                      |
| 1,139 | ENSG00000197694 | SPTAN1    | spectrin alpha, non-erythrocytic 1                                  | 1,511 | ENSG00000100784  | RPS6KA5       | ribosomal protein S6 kinase A5                                            |
| 1,215 | ENSG00000115306 | SPTBN1    | spectrin beta, non-erythrocytic 1                                   | 1,35  | ENSG00000141858  | RRAD          | RRAD related glycosyl inositol and calcium channel regulator              |
| 2,049 | ENSG00000104549 | SQLE      | squalene epoxidase                                                  | 2,245 | ENSG00000052749  | RRP12         | ribosomal RNA processing 12 homolog B                                     |
| 1,048 | ENSG00000197122 | SRC       | SRC proto-oncogene, non-receptor tyrosine kinase                    | 1,093 | ENSG00000182841  | RRP7BP        | ribosomal RNA processing 7 homolog A                                      |
| 1,214 | ENSG00000198911 | SREBF2    | sterol regulatory element binding transcription factor 2            | 1,28  | ENSG00000160188  | RSPH1         | radial spoke head 1 homolog                                               |
| 1,855 | ENSG00000112658 | SRF       | serum response factor                                               | 1,522 | ENSG00000111011  | RSRC2         | arginine and serine rich coiled-coil 2                                    |
| 1,365 | ENSG00000196935 | SRGAP1    | SLIT-ROBO Rho GTPase activating protein 1                           | 1,775 | ENSG00000117616  | RSRP1         | arginine and serine rich protein 1                                        |
| 1,099 | ENSG00000133226 | SRRM1     | serine and arginine repetitive matrix 1                             | 1,491 | ENSG00000108656  | RTG5          | retrotransposon Gag like 6                                                |
| 1,709 | ENSG00000167978 | SRRM2     | serine/arginine repetitive matrix 2                                 | 1,273 | ENSG00000185924  | RTNML1        | reticulon 4 receptor like 1                                               |
| 1,043 | ENSG00000087087 | SRR1      | serate, RNA effector molecule                                       | 1,499 | ENSG00000102445  | RUBCNL        | RUN and cysteine rich domain containing beclin 1 interacting protein like |
| 1,27  | ENSG00000154548 | SRSF12    | serine and arginine rich splicing factor 12                         | 1,343 | ENSG00000159216  | RUNX1         | runt related transcription factor 1                                       |
| 1,08  | ENSG00000084112 | SSH1      | slingshot protein phosphatase 1                                     | 2,018 | ENSG00000198853  | RUSC2         | RUN and SH3 domain containing 2                                           |
| 1,953 | ENSG00000149418 | ST14      | suppression of tumorigenicity 14                                    | 2,235 | ENSG00000197747  | S100A10       | S100 calcium binding protein A10                                          |
| 1,123 | ENSG00000166444 | ST5       | suppression of tumorigenicity 5                                     | 1,166 | ENSG00000163191  | S100A11       | S100 calcium binding protein A11                                          |
| 1,635 | ENSG00000164539 | STP1      | stress induced phosphoprotein 1                                     | 1,809 | ENSG00000189318  | S100A14       | S100 calcium binding protein A14                                          |
| 1,496 | ENSG00000164543 | STK17A    | serine/threonine kinase 17a                                         | 1,511 | ENSG00000196754  | S100A2        | S100 calcium binding protein A2                                           |
| 2,118 | ENSG00000130413 | STK33     | serine/threonine kinase 33                                          | 1,81  | ENSG00000197956  | S100A6        | S100 calcium binding protein A6                                           |
| 1,092 | ENSG00000163482 | STK36     | serine/threonine kinase 36                                          | 1,453 | ENSG00000160633  | SABF          | scaffold attachment factor B                                              |
| 1,097 | ENSG00000198648 | STK39     | serine/threonine kinase 39                                          | 1,133 | ENSG00000130254  | SABF2         | scaffold attachment factor B2                                             |
| 1,378 | ENSG00000173320 | STOX2     | storkhead box 2                                                     | 1,004 | ENSG00000141858  | SAMD1         | sterile alpha motif domain containing 1                                   |
| 1,445 | ENSG00000178150 | STX19     | syntaxin 19                                                         | 1,055 | ENSG00000120517  | SAMD4         | sterile alpha motif domain containing 4A                                  |
| 1,747 | ENSG00000166900 | STX3      | syntaxin 3                                                          | 1,209 | ENSG00000179134  | SAMD4B        | sterile alpha motif domain containing 4B                                  |
| 1,734 | ENSG00000168952 | STXBP6    | syntaxin binding protein 6                                          | 1,186 | ENSG00000161526  | SAP30BP       | SAP30 binding protein                                                     |
| 1,5   | ENSG00000064607 | SUGP2     | SURP and G-patch domain containing 2                                | 1,144 | ENSG00000100241  | SBF1          | SET binding factor 1                                                      |
| 1,894 | ENSG00000198075 | SULT1C4   | sulfotransferase family 1C member 4                                 | 1,493 | ENSG00000156304  | SCAF4         | SR-related CTD associated factor 4                                        |
| 1,016 | ENSG00000196235 | SUFTHS1   | SFTs homolog, DSIF elongation factor subunit                        | 1,479 | ENSG00000213079  | SCAF8         | SR-related CTD associated factor 8                                        |
| 1,017 | ENSG00000100647 | SUSD6     | supern domain containing 6                                          | 1,005 | ENSG00000140386  | SCARF         | S-phase cyclin A associated protein in the ER                             |
| 1,23  | ENSG00000197321 | SVIL      | supervillin                                                         | 1,669 | ENSG00000145284  | SCDS          | stearoyl-CoA desaturase 5                                                 |
| 1,023 | ENSG00000133789 | SWAP70    | SWAP switching B-cell complex subunit 70                            | 1,379 | ENSG00000124939  | SCGB2A1       | secretoglobulin family 2A member 1                                        |
| 1,762 | ENSG00000205078 | SYCE1L    | synaptonemal complex central element protein 1 like                 | 1,393 | ENSG00000079689  | SCGN          | secretagogin, EF-hand calcium binding protein                             |
| 1,11  | ENSG00000097096 | SYDE2     | synapse defective Rho GTPase homolog 2                              | 1,548 | ENSG00000111319  | SCNN1A        | sodium channel epithelial 1 alpha subunit                                 |
| 1,02  | ENSG00000054654 | SYNE2     | spectrin repeat containing nuclear envelope protein 2               | 1,929 | ENSG00000136193  | SCN11         | scerinin 1                                                                |
| 1,251 | ENSG00000100321 | SYNGR1    | synaptogrin 1                                                       | 2,462 | ENSG00000080293  | SCTR          | serotonin receptor                                                        |
| 1,42  | ENSG00000078269 | SYN12     | synaptogrin 2                                                       | 1,11  | ENSG00000185485  | SDHAP1        | succinate dehydrogenase complex flavoprotein subunit A pseudogene 1       |
| 2,156 | ENSG00000254806 | SYSL-DBND | SYSL-DBND2 readthrough (NMD candidate)                              | 1,012 | ENSG00000215837  | SDHAP2        | succinate dehydrogenase complex flavoprotein subunit A pseudogene 2       |
| 1,387 | ENSG0000019505  | SYT13     | synaptotagmin 13                                                    | 1,088 | ENSG00           |               |                                                                           |

|       |                  |             |                                                           |       |                 |             |                                                                                                   |
|-------|------------------|-------------|-----------------------------------------------------------|-------|-----------------|-------------|---------------------------------------------------------------------------------------------------|
| 1,118 | ENSG00000115970  | THADA       | THADA, armadillo repeat containing thrombospondin 1       | 2,021 | ENSG00000237515 | SHISA9      | shisa family member 9                                                                             |
| 1,193 | ENSG00000103871  | THBS1       | thrombospondin 1                                          | 1,94  | ENSG00000138771 | SHROOM3     | shroom family member 3                                                                            |
| 1,059 | ENSG00000054118  | THRAP3      | thyroid hormone receptor associated protein 3             | 1,565 | ENSG00000160584 | SIK3        | SIK family kinase 3                                                                               |
| 1,814 | ENSG00000187720  | THSD4       | thrombospondin type 1 domain containing 4                 | 1,037 | ENSG00000175565 | SIPAL1L     | signal induced proliferation associated 1 like 1                                                  |
| 1,627 | ENSG00000146426  | TIAM2       | T-cell lymphoma invasion and metastasis 2                 | 1,779 | ENSG00000096717 | SIRT1       | sirtuin 1                                                                                         |
| 2,36  | ENSG00000127666  | TICAM1      | toll like receptor adaptor molecule 1                     | 1,597 | ENSG00000100625 | SIX4        | SIX homeobox 4                                                                                    |
| 1,038 | ENSG00000142910  | TINAGL1     | tubulointerstitial nephritis antigen like 1               | 2,608 | ENSG00000064651 | SLC12A2     | solute carrier family 12 member 2                                                                 |
| 2,046 | ENSG00000163659  | TIPARP      | TCD inducible poly(ADP-ribose) polymerase                 | 1,306 | ENSG00000124067 | SLC12A4     | solute carrier family 12 member 4                                                                 |
| 1,521 | ENSG00000104067  | TJP1        | tight junction protein 1                                  | 1,132 | ENSG00000113504 | SLC12A7     | solute carrier family 12 member 7                                                                 |
| 1,873 | ENSG00000119139  | TJP2        | tight junction protein 2                                  | 1,624 | ENSG00000118596 | SLC16A7     | solute carrier family 16 member 7                                                                 |
| 1,165 | ENSG00000196781  | TLE1        | transducin like enhancer of split 1                       | 1,549 | ENSG00000117479 | SLC35A2     | solute carrier family 35 member 2                                                                 |
| 1,336 | ENSG00000065717  | TLE2        | transducin like enhancer of split 2                       | 1,534 | ENSG00000105281 | SLC3A5      | solute carrier family 3 member 5                                                                  |
| 1,662 | ENSG00000106829  | TLE4        | transducin like enhancer of split 4                       | 1,452 | ENSG00000144136 | SLC20A1     | solute carrier family 20 member 1                                                                 |
| 1,095 | ENSG00000187554  | TLRS        | toll like receptor 5                                      | 1,132 | ENSG00000197375 | SLC22A5     | solute carrier family 22 member 5                                                                 |
| 2,519 | ENSG00000169908  | TMS4F1      | transmembrane 4 L six family member 1                     | 1,268 | ENSG00000148339 | SLC25A25    | solute carrier family 25 member 25                                                                |
| 1,498 | ENSG00000103534  | TMC5        | transmembrane channel like 5                              | 1,417 | ENSG00000152921 | SLC25A27    | solute carrier family 25 member 27                                                                |
| 1,368 | ENSG00000133059  | TMC2C       | transmembrane and coiled-coil domain family 2             | 1,213 | ENSG00000197119 | SLC25A29    | solute carrier family 25 member 29                                                                |
| 1,801 | ENSG000000006118 | TMEM132A    | transmembrane protein 132A                                | 1,127 | ENSG00000001138 | SLC26A3     | solute carrier family 26 member 3                                                                 |
| 2,327 | ENSG00000181264  | TMEM136     | transmembrane protein 136                                 | 1,158 | ENSG00000130304 | SLC27A1     | solute carrier family 27 member 1                                                                 |
| 2,375 | ENSG00000249992  | TMEM158     | transmembrane protein 158 (gene/pseudogene)               | 2,107 | ENSG00000197506 | SLC28A3     | solute carrier family 28 member 3                                                                 |
| 1,135 | ENSG00000152128  | TMEM163     | transmembrane protein 163                                 | 1,938 | ENSG00000174669 | SLC29A2     | solute carrier family 29 member 2                                                                 |
| 2,239 | ENSG00000157111  | TMEM171     | transmembrane protein 171                                 | 1,942 | ENSG00000117394 | SLC2A3      | solute carrier family 2 member 3                                                                  |
| 1,458 | ENSG00000154855  | TMEM184A    | transmembrane protein 184A                                | 1,194 | ENSG00000205984 | SLC2A3      | solute carrier family 2 member 3                                                                  |
| 1,245 | ENSG00000182796  | TMEM188B    | transmembrane protein 188B (pseudogene)                   | 1,847 | ENSG00000157765 | SLC3A2      | solute carrier family 34 member 2                                                                 |
| 1,892 | ENSG00000186329  | TMEM212     | transmembrane protein 212                                 | 1,171 | ENSG00000100036 | SLC3E4      | solute carrier family 35 member E4                                                                |
| 1,135 | ENSG00000172738  | TMEM217     | transmembrane protein 217                                 | 2,367 | ENSG00000110660 | SLC3F2      | solute carrier family 35 member F2                                                                |
| 1,195 | ENSG00000182107  | TMEM30B     | transmembrane protein 30B                                 | 1,066 | ENSG00000183780 | SLC3F3      | solute carrier family 35 member F3                                                                |
| 1,579 | ENSG00000171729  | TMEM51      | transmembrane protein 51                                  | 1,502 | ENSG00000111371 | SLC38A1     | solute carrier family 38 member 1                                                                 |
| 1,225 | ENSG00000121900  | TMEM54      | transmembrane protein 54                                  | 1,331 | ENSG00000165907 | SLC38A11    | solute carrier family 38 member 11                                                                |
| 1,481 | ENSG00000195187  | TMEM63A     | transmembrane protein 63A                                 | 2,534 | ENSG00000168003 | SLC3A2      | solute carrier family 3 member 2                                                                  |
| 1,009 | ENSG00000137103  | TMEM88      | transmembrane protein 88                                  | 1,702 | ENSG00000133065 | SLC41A1     | solute carrier family 41 member 1                                                                 |
| 1,567 | ENSG00000137747  | TMPRSS13    | transmembrane protease, serine 13                         | 1,099 | ENSG00000143036 | SLC44A3     | solute carrier family 44 member 3                                                                 |
| 1,337 | ENSG00000184012  | TMPRSS2     | transmembrane protease, serine 2                          | 1,018 | ENSG00000225267 | SLC45A4     | solute carrier family 45 member 4                                                                 |
| 2,294 | ENSG00000160183  | TMPRSS3     | transmembrane protease, serine 3                          | 1,201 | ENSG00000114923 | SLC4A3      | solute carrier family 4 member 3                                                                  |
| 2,362 | ENSG00000041982  | TNC         | tenascin C                                                | 1,693 | ENSG00000008493 | SLC4A4      | solute carrier family 4 member 4                                                                  |
| 2,899 | ENSG00000185215  | TNFAIP2     | TNF alpha induced protein 2                               | 1,54  | ENSG00000033867 | SLC4A7      | solute carrier family 4 member 7                                                                  |
| 3,713 | ENSG00000118503  | TNFAIP3     | TNF alpha induced protein 3                               | 1,857 | ENSG00000100170 | SLCSA1      | solute carrier family 5 member 1                                                                  |
| 1,621 | ENSG00000104689  | TNFRSF10A   | TNF receptor superfamily member 10a                       | 1,64  | ENSG00000154025 | SLCSA10     | solute carrier family 5 member 10                                                                 |
| 1,999 | ENSG00000120889  | TNFRSF10B   | TNF receptor superfamily member 10b                       | 1,111 | ENSG00000198743 | SLCSA3      | solute carrier family 5 member 3                                                                  |
| 2,265 | ENSG00000173530  | TNFRSF10D   | TNF receptor superfamily member 10d                       | 1,724 | ENSG00000117834 | SLCSA9      | solute carrier family 5 member 9                                                                  |
| 1,97  | ENSG00000006327  | TNFRSF12A   | TNF receptor superfamily member 12A                       | 2,022 | ENSG00000174358 | SLCSA19     | solute carrier family 6 member 19                                                                 |
| 2,551 | ENSG00000127863  | TNFRSF19    | TNF receptor superfamily member 19                        | 1,782 | ENSG00000131389 | SLCSA6      | solute carrier family 6 member 6                                                                  |
| 2,088 | ENSG00000146072  | TNFRSF21    | TNF receptor superfamily member 21                        | 2,737 | ENSG00000139514 | SLCTA1      | solute carrier family 7 member 1                                                                  |
| 1,221 | ENSG00000243509  | TNFRSF6B    | TNF receptor superfamily member 6b                        | 3,116 | ENSG00000103257 | SLCTA5      | solute carrier family 7 member 5                                                                  |
| 1,759 | ENSG00000248871  | TNFSF12-IT1 | TNFSF12-TNFSF13 readthrough                               | 2,218 | ENSG00000260727 | SLCTA5P2    | solute carrier family 7 member 5 pseudogene 2                                                     |
| 3,102 | ENSG00000125657  | TNFSF9      | TNF superfamily member 9                                  | 2,687 | ENSG00000258186 | SLCTA5P1    | solute carrier family 7 member 5 pseudogene 1                                                     |
| 1,452 | ENSG00000149115  | TNKS1BP1    | tyrosine kinase binding protein 1                         | 1,703 | ENSG00000009020 | SLC9A1      | solute carrier family 9 member A1                                                                 |
| 1,417 | ENSG00000138664  | TOB2        | translocase of outer mitochondrial membrane 2             | 1,116 | ENSG00000205230 | SLC9A3      | solute carrier family 9 member A3                                                                 |
| 1,144 | ENSG00000025772  | TOMM34      | translocase of outer mitochondrial membrane 34            | 1,452 | ENSG00000174643 | SLCO3A1     | solute carrier organic anion transporter family member 3A1                                        |
| 1,016 | ENSG00000198900  | TOP1        | topoisomerase (DNA) I                                     | 1,096 | ENSG00000101187 | SLCO4A1     | solute carrier organic anion transporter family member 4A1                                        |
| 1,158 | ENSG00000103460  | TOX3        | TOX high mobility group box family member 3               | 1,163 | ENSG00000154760 | SLFN13      | schlafen family member 13                                                                         |
| 1,625 | ENSG00000067369  | TP53BP1     | tumor protein p53 binding protein 1                       | 1,609 | ENSG00000065613 | SLK         | STE20 like kinase                                                                                 |
| 3,191 | ENSG00000143514  | TP53BP2     | tumor protein p53 binding protein 2                       | 2,349 | ENSG00000166949 | SMAD3       | SMAD family member 3                                                                              |
| 1,346 | ENSG00000115129  | TP53I3      | tumor protein p53 inducible protein 3                     | 1,044 | ENSG00000170545 | SMAD9       | small actin adhesion glycoprotein                                                                 |
| 2,516 | ENSG00000146242  | TPBG        | trophoblast glycoprotein                                  | 1,822 | ENSG00000127616 | SMARCA4     | SWI/SNF related, matrix associated, actin dependent regulator of chromatin, subfamily a, member 4 |
| 1,649 | ENSG00000171368  | TPPP        | tubulin polymerization promoting protein                  | 1,265 | ENSG00000198887 | SMC5        | structural maintenance of chromosomes 5                                                           |
| 2,594 | ENSG00000159713  | TPPP3       | tubulin polymerization promoting protein family member 3  | 1,14  | ENSG00000116698 | SMG7        | SMG7, nonsense mediated mRNA decay factor                                                         |
| 2,265 | ENSG00000056558  | TRAF1       | TNF receptor associated factor 1                          | 2,442 | ENSG00000172062 | SMN1/SMN2   | survival of motor neuron 1, telomeric                                                             |
| 1,359 | ENSG00000182606  | TRAK1       | trafficking kinesin protein 1                             | 2,404 | ENSG00000088826 | SMOX        | sphingosine oxidase                                                                               |
| 3,412 | ENSG00000173354  | TRB1        | tribbles pseudokinase 1                                   | 1,431 | ENSG00000133056 | SMPD3       | sphingomyelin phosphodiesterase 3                                                                 |
| 1,012 | ENSG00000130726  | TRIM28      | tripartite motif containing 28                            | 1,341 | ENSG00000130768 | SMRN3B      | sphingomyelin phosphodiesterase acid like 3B                                                      |
| 2,339 | ENSG00000137699  | TRIM29      | tripartite motif containing 29                            | 2,266 | ENSG00000198742 | SMURF1      | SMAD specific E3 ubiquitin protein ligase 1                                                       |
| 1,345 | ENSG00000134253  | TRIM45      | tripartite motif containing 45                            | 1,069 | ENSG00000132639 | SNAP25      | synaptosome associated protein 25                                                                 |
| 1,857 | ENSG00000132481  | TRIM47      | tripartite motif containing 47                            | 1,416 | ENSG00000247092 | SNHG10      | small nucleolar RNA host gene 10                                                                  |
| 1,05  | ENSG00000038382  | TRIO        | trio Rho guanine nucleotide exchange factor               | 2,22  | ENSG00000163877 | SNIP1       | Smad nuclear interacting protein 1                                                                |
| 1,498 | ENSG00000125733  | TRIP10      | thyroid hormone receptor interactor 10                    | 1,265 | ENSG00000184602 | SNK         | stannin                                                                                           |
| 1,455 | ENSG00000233368  | TRNP1       | TNF1-regulated nuclear protein 1                          | 1,397 | ENSG00000100861 | SNORA10     | small nucleolar RNA, H/ACA box 10                                                                 |
| 1,026 | ENSG00000130529  | TRPM4       | transient receptor potential channel subfamily M member 4 | 3,539 | ENSG00000238363 | SNORA13     | small nucleolar RNA, H/ACA box 13                                                                 |
| 1,099 | ENSG00000165699  | TSC1        | tuberous sclerosis 1                                      | 6,212 | ENSG00000206910 | SNORA29     | small nucleolar RNA, H/ACA box 29                                                                 |
| 1,086 | ENSG00000103197  | TSC2        | tuberous sclerosis 2                                      | 2,204 | ENSG00000206612 | SNORA29.2   | small nucleolar RNA, H/ACA box 2A                                                                 |
| 2,906 | ENSG00000196428  | TSC2D2      | TSC2D2 domain family member 2                             | 4,454 | ENSG00000207313 | SNORA2B     | small nucleolar RNA, H/ACA box 2B                                                                 |
| 1,607 | ENSG00000009982  | TSPAN15     | tetraspanin 15                                            | 3,011 | ENSG00000228961 | SNORA47     | small nucleolar RNA, H/ACA box 47                                                                 |
| 1,611 | ENSG00000005379  | TSPCA9P1    | TSPC associated protein 1                                 | 4,227 | ENSG00000202172 | SNORA48     | small nucleolar RNA, H/ACA box 48                                                                 |
| 1,09  | ENSG00000187189  | TSPYL4      | TSPY like 4                                               | 3,094 | ENSG00000206760 | SNORA6      | small nucleolar RNA, H/ACA box 6                                                                  |
| 1,738 | ENSG00000214021  | TTL3        | tubulin tyrosine ligase like 3                            | 3,971 | ENSG00000201302 | SNORA65     | small nucleolar RNA, H/ACA box 65                                                                 |
| 1,381 | ENSG00000135912  | TTL4        | tubulin tyrosine ligase like 4                            | 2,946 | ENSG00000206869 | SNORA70F    | small nucleolar RNA, H/ACA box 70F                                                                |
| 1,329 | ENSG00000167553  | TUBA1C      | tubulin alpha 1c                                          | 1,804 | ENSG00000200959 | SNORA74A    | small nucleolar RNA, H/ACA box 74A                                                                |
| 1,129 | ENSG00000137267  | TUBB2A      | tubulin beta 2A class IIIa                                | 3,925 | ENSG00000207088 | SNORA7B     | small nucleolar RNA, H/ACA box 7B                                                                 |
| 1,395 | ENSG00000137225  | TUBB2B      | tubulin beta 2B class IIIb                                | 4,227 | ENSG00000206633 | SNORA80B    | small nucleolar RNA, H/ACA box 80B                                                                |
| 1,161 | ENSG00000104833  | TUBB4A      | tubulin beta 4A class IVa                                 | 2,333 | ENSG00000239183 | SNORA8A     | small nucleolar RNA, H/ACA box 8A                                                                 |
| 1,367 | ENSG00000188229  | TUBB4B      | tubulin beta 4B class IVb                                 | 5,748 | ENSG00000199753 | SNORD104    | small nucleolar RNA, C/D box 104                                                                  |
| 1,311 | ENSG00000128159  | TUBGCP6     | tubulin gamma complex associated protein 6                | 3,687 | ENSG00000251815 | SNORD116-26 | small nucleolar RNA, C/D box 116-26                                                               |
| 2,317 | ENSG00000143367  | TUFT1       | tuffin 1                                                  | 5,897 | ENSG00000202745 | SNORD116-29 | small nucleolar RNA, C/D box 116-29                                                               |
| 1,082 | ENSG00000253352  | TUG1        | taurine up-regulated 1 (non-protein coding)               | 4,893 | ENSG00000207014 | SNORD116-3  | small nucleolar RNA, C/D box 116-3                                                                |
| 1,022 | ENSG00000137073  | UBAP2       | ubiquitin associated protein 2                            | 1,658 | ENSG00000207191 | SNORD116-5  | small nucleolar RNA, C/D box 116-5                                                                |
| 1,005 | ENSG00000143569  | UBAP2L      | ubiquitin associated protein 2 like                       | 7,213 | ENSG00000213204 | SNORD12     | small nucleolar RNA, C/D box 12                                                                   |
| 2,519 | ENSG00000150991  | UBC         | ubiquitin C                                               | 7,032 | ENSG00000238300 | SNORD121B   | small nucleolar RNA, C/D box 121B                                                                 |
| 1,187 | ENSG00000186591  | UBE2H       | ubiquitin conjugating enzyme E2 H                         | 8,772 | ENSG00000209042 | SNORD12C    | small nucleolar RNA, C/D box 12C                                                                  |
| 1,809 | ENSG00000108106  | UBE2S       | ubiquitin conjugating enzyme E2 S                         | 4,438 | ENSG00000206941 | SNORD15A    | small nucleolar RNA, C/D box 15A                                                                  |
| 1,01  | ENSG00000177414  | UBE2U       | ubiquitin conjugating enzyme E2 U (putative)              | 4,435 | ENSG00000199673 | SNORD16     | small nucleolar RNA, C/D box 16                                                                   |
| 1,292 | ENSG00000158062  | UBNK11      | UBK domain protein 11                                     | 4,392 | ENSG00000200530 | SNORD35B    | small nucleolar RNA, C/D box 35B                                                                  |
| 1,213 | ENSG00000214049  | UC1A        | urothelial cancer associated 1 (non-protein coding)       | 1,855 | ENSG00000183018 | SNORD38     | small nucleolar RNA, C/D box 38                                                                   |
| 1,319 | ENSG00000148154  | UGCG        | UDP-glucose ceramide glucosyltransferase                  | 5,119 | ENSG00000207031 | SNORD59A    | small nucleolar RNA, C/D box 59A                                                                  |
| 2,083 | ENSG00000174607  | UGT8        | UDP glucosyltransferase 8                                 | 4,454 | ENSG00000223224 | SNORD71     | small nucleolar RNA, C/D box 71                                                                   |
| 1,013 | ENSG00000124602  | UNC5CL      | unc-5 family C-terminal like                              | 4,716 | ENSG00000200785 | SNORD8      | small nucleolar RNA, C/D box 8                                                                    |
| 1,339 | ENSG000000005007 | UPF1        | UPF1, RNA helicase and ATPase                             | 5,79  | ENSG00000209482 | SNORD83A    | small nucleolar RNA, C/D box 83A                                                                  |
| 1,016 | ENSG0000014638   | UPK1B       | urokinase 1B                                              | 4,078 | ENSG00000208772 | SNORD94     | small nucleolar RNA, C/D box 94                                                                   |
| 1,055 | ENSG00000106608  | USCP3       | uroporphyrin cofactor III proliferation                   | 1,235 | ENSG00000114028 | SNRPAP0     | small nuclear ribonucleoprotein US subunit 200                                                    |
| 1,988 | ENSG000000006611 | USHC1       | USH1 protein network component harmonin                   | 1,148 | ENSG00000104852 | SNRNP70     | small nuclear ribonucleoprotein U1 subunit 70                                                     |
| 1,242 | ENSG00000102226  | USP11       | ubiquitin specific peptidase 11                           | 2,119 | ENSG00000184557 | SOC3S       | suppressor of cytokine signaling 3                                                                |
| 1,815 | ENSG00000154914  | USP43       | ubiquitin specific peptidase 43                           | 1,215 | ENSG00000159140 | SON         | SON DNA binding protein                                                                           |
| 1,194 | ENSG00000132952  | USPL1       | ubiquitin specific peptidase like 1                       | 1,614 | ENSG00000198142 | SOWAHC      | sonosdown ankryin repeat domain family member C                                                   |
| 1,08  | ENSG00000168140  | VASN        | vasorin                                                   | 1,499 | ENSG00000164736 | SOX17       | SRY-box 17                                                                                        |
| 1,143 | ENSG00000171724  | VAT1L       | vesicle amine transport 1 like                            | 3,186 | ENSG00000124766 | SOX4        | SRY-box 4                                                                                         |
| 1,21  | ENSG000000058427 | VCAN        | versican                                                  | 3,061 | ENSG00000125398 | SOX9        | SRY-box 9                                                                                         |
| 2,057 | ENSG00000112715  | VEGFA       | vascular endothelial growth factor A</                    |       |                 |             |                                                                                                   |

|       |                 |                                   |                                                        |       |                 |              |                                                                        |
|-------|-----------------|-----------------------------------|--------------------------------------------------------|-------|-----------------|--------------|------------------------------------------------------------------------|
| 1,652 | ENSG00000113645 | WWC1                              | WW and C2 domain containing 1                          | 1,487 | ENSG00000084112 | SSH1         | slingshot protein phosphatase 1                                        |
| 1,249 | ENSG00000198373 | WWP2                              | WW domain containing E3 ubiquitin protein ligase 2     | 2,452 | ENSG00000149418 | ST14         | suppression of tumorigenicity 14                                       |
| 1,445 | ENSG00000184808 | WWTR1                             | WW domain containing transcription regulator 1         | 1,555 | ENSG00000133121 | STAR1D13     | STAR related lipid transfer domain containing 13                       |
| 1,967 | ENSG00000180667 | YOD1                              | YOD1 deubiquitinase                                    | 1,447 | ENSG00000159167 | STC1         | stanniocalcin 1                                                        |
| 1,355 | ENSG00000175155 | YPB12                             | ypbpe like 2                                           | 2,084 | ENSG00000168439 | STP1         | stress induced phosphoprotein 1                                        |
| 1,658 | ENSG00000205189 | ZBTB10                            | zinc finger and BTB domain containing 10               | 2,296 | ENSG00000164543 | STK17A       | serine/threonine kinase 17a                                            |
| 1,518 | ENSG00000109906 | ZBTB16                            | zinc finger and BTB domain containing 16               | 1,826 | ENSG00000130413 | STK33        | serine/threonine kinase 33                                             |
| 1,809 | ENSG00000181472 | ZBTB2                             | zinc finger and BTB domain containing 2                | 1,195 | ENSG00000125834 | STK35        | serine/threonine kinase 35                                             |
| 2,039 | ENSG00000181722 | ZBTB20                            | zinc finger and BTB domain containing 20               | 1,125 | ENSG00000163482 | STK36        | serine/threonine kinase 36                                             |
| 1,355 | ENSG00000177125 | ZBTB34                            | zinc finger and BTB domain containing 34               | 1,222 | ENSG00000139848 | STK39        | serine/threonine kinase 39                                             |
| 1,114 | ENSG00000194677 | ZBTB40                            | zinc finger and BTB domain containing 40               | 1,832 | ENSG00000136182 | STK40        | serine/threonine kinase 40                                             |
| 2,362 | ENSG00000169155 | ZBTB43                            | zinc finger and BTB domain containing 43               | 1,298 | ENSG00000173320 | STOX2        | storkhead box 2                                                        |
| 1,268 | ENSG00000178951 | ZBTB7A                            | zinc finger and BTB domain containing 7A               | 2,462 | ENSG00000166900 | STX3         | syntaxin 3                                                             |
| 4,604 | ENSG00000163874 | ZC3H12A                           | zinc finger CCHC-type containing 12A                   | 1,441 | ENSG00000168952 | STXBP6       | syntaxin binding protein 6                                             |
| 1,272 | ENSG00000105939 | ZC3HAV1                           | zinc finger CCHC-type containing, antiviral 1          | 1,54  | ENSG00000064607 | SUGP2        | SURP and G-patch domain containing 2                                   |
| 1,195 | ENSG00000033030 | ZCCHC8                            | zinc finger CCHC-type containing 8                     | 2,022 | ENSG00000159075 | SULT1C4      | sulfotransferase family 1C member 4                                    |
| 1,105 | ENSG00000159714 | ZDNHC1                            | zinc finger DNHCH-type containing 1                    | 1,156 | ENSG00000154828 | SUN1         | Sad1 and UNC84 domain containing 1                                     |
| 2,023 | ENSG00000178381 | ZFAND2A                           | zinc finger AN1-type containing 2A                     | 1,268 | ENSG00000100647 | SUSD6        | sushi domain containing 6                                              |
| 1,408 | ENSG00000133858 | ZFC3H1                            | zinc finger C3H1-type containing                       | 1,116 | ENSG00000264538 | SUZ12P1      | SUZ12 polycomb repressive complex 2 subunit pseudogene 1               |
| 2,784 | ENSG00000128016 | ZFP36                             | ZFP36 ring finger protein                              | 1,586 | ENSG00000197321 | SVIL         | supervillin                                                            |
| 1,277 | ENSG00000185650 | ZFP36L1                           | ZFP36 ring finger protein like 1                       | 1,583 | ENSG00000133789 | SWAP70       | SWAP switching B-cell complex subunit 70                               |
| 2,544 | ENSG00000162078 | ZG3L8                             | zymogen granule protein 16B                            | 1,656 | ENSG00000205078 | SYCE11       | synaptonemal complex central element protein 1 like                    |
| 1,056 | ENSG00000178764 | ZHIC2                             | zinc fingers and homeoboxes 2                          | 1,304 | ENSG00000207096 | SYDE2        | synapse defective Rho GTPase homolog 2                                 |
| 1,475 | ENSG00000108175 | ZMI21                             | zinc finger MI2-type containing 1                      | 1,034 | ENSG00000100321 | SYNGR1       | synaptogyrin 1                                                         |
| 1,607 | ENSG00000122515 | ZMI22                             | zinc finger MI2-type containing 2                      | 2,225 | ENSG00000078269 | SYNY2        | synaptotagmin 2                                                        |
| 1,151 | ENSG00000115568 | ZNF142                            | zinc finger protein 142                                | 1,599 | ENSG00000254806 | SYSL-DBNDD2  | SYSL-DBNDD2 readthrough (NMD candidate)                                |
| 3,271 | ENSG00000192779 | ZNF165                            | zinc finger protein 165                                | 1,745 | ENSG00000149043 | SYT8         | synaptotagmin 8                                                        |
| 1,758 | ENSG00000171940 | ZNF217                            | zinc finger protein 217                                | 1,064 | ENSG00000138162 | TACC2        | transforming acidic coiled-coil containing protein 2                   |
| 1,361 | ENSG00000165804 | ZNF219                            | zinc finger protein 219                                | 3,458 | ENSG00000184292 | TACSTD2      | tumor associated calcium signal transducer 2                           |
| 1,079 | ENSG00000159917 | ZNF235                            | zinc finger protein 235                                | 1,135 | ENSG00000103168 | TAF1C        | TATA-box binding protein associated factor, RNA polymerase I subunit C |
| 1,153 | ENSG00000130856 | ZNF236                            | zinc finger protein 236                                | 1,721 | ENSG00000166012 | TAF1D        | TATA-box binding protein associated factor, RNA polymerase I subunit D |
| 1,307 | ENSG00000152454 | ZNF256                            | zinc finger protein 256                                | 1,331 | ENSG00000141384 | TAF4B        | TATA-box binding protein associated factor 4b                          |
| 1,275 | ENSG00000185947 | ZNF267                            | zinc finger protein 267                                | 1,135 | ENSG00000099992 | TBC1D10A     | TBC1 domain family member 10A                                          |
| 1,307 | ENSG00000162702 | ZNF281                            | zinc finger protein 281                                | 1,868 | ENSG00000065491 | TBC1D22B     | TBC1 domain family member 22B                                          |
| 2,157 | ENSG00000170684 | ZNF296                            | zinc finger protein 296                                | 1,921 | ENSG00000204634 | TBC1D8       | TBC1 domain family member 8                                            |
| 1,023 | ENSG00000130803 | ZNF317                            | zinc finger protein 317                                | 1,146 | ENSG00000165929 | TCF21        | tandem C2 domains, nuclear transcription elongation regulator 1        |
| 1,279 | ENSG00000198026 | ZNF335                            | zinc finger protein 335                                | 1,553 | ENSG00000113649 | TCERG1       | transcription elongation regulator 1                                   |
| 1,239 | ENSG00000197467 | ZNF433                            | zinc finger protein 433                                | 1,008 | ENSG00000071564 | TCF3         | transcription factor 3                                                 |
| 1,029 | ENSG00000083838 | ZNF446                            | zinc finger protein 446                                | 1,888 | ENSG00000134827 | TCN1         | transcobalamin 1                                                       |
| 1,679 | ENSG00000105732 | ZNF574                            | zinc finger protein 574                                | 1,11  | ENSG00000120438 | TCP1         | t-complex 1                                                            |
| 1,251 | ENSG00000166716 | ZNF592                            | zinc finger protein 592                                | 1,181 | ENSG00000188396 | TECTEX1D4    | Tctex1 domain containing 4                                             |
| 1,352 | ENSG00000168916 | ZNF608                            | zinc finger protein 608                                | 1,219 | ENSG00000180190 | TOR1P        | testis development related protein                                     |
| 1,593 | ENSG00000171163 | ZNF692                            | zinc finger protein 692                                | 1,251 | ENSG00000187079 | TEAD1        | TEA domain transcription factor 1                                      |
| 1,531 | ENSG00000147180 | ZNF711                            | zinc finger protein 711                                | 1,009 | ENSG00000135605 | TEC          | tec protein tyrosine kinase                                            |
| 1,039 | ENSG00000221874 | ZNF816-ZNF816-ZNF321P readthrough |                                                        | 1,246 | ENSG00000092850 | TEKT2        | tektin 2                                                               |
| 1,375 | ENSG00000257446 | ZNF878                            | zinc finger protein 878                                | 3,201 | ENSG00000135269 | TES          | testin LIM domain protein                                              |
| 1,293 | ENSG00000170044 | ZPLD1                             | zona pellucida like domain containing 1                | 1,231 | ENSG00000088992 | TESC         | tescalin                                                               |
| 1,263 | ENSG00000229956 | ZRANB2-AS                         | ZRANB2 antisense RNA 2 (head to head)                  | 1,236 | ENSG00000136891 | TEX1D1       | testis expressed 10                                                    |
| 1,46  | ENSG00000219891 | ZSCAN12P1                         | zinc finger and SCAN domain containing 12 pseudogene 1 | 1,931 | ENSG00000087510 | TFAP2C       | transcription factor AP-2 gamma                                        |
| 1,044 | ENSG00000121413 | ZSCAN18                           | zinc finger and SCAN domain containing 18              | 1,066 | ENSG00000112561 | TFEB         | transcription factor EB                                                |
| 2,171 | ENSG00000132003 | ZSWIM4                            | zinc finger SWIM-type containing 4                     | 2,587 | ENSG00000160182 | TFE1         | trefoil factor 1                                                       |
| 1,534 | ENSG00000130449 | ZSWIM6                            | zinc finger SWIM-type containing 6                     | 1,992 | ENSG00000160181 | TFE2         | trefoil factor 2                                                       |
| 1,487 | ENSG00000198455 | ZXDB                              | zinc finger, X-linked, duplicated B                    | 3,389 | ENSG00000105825 | TFPI2        | tissue factor pathway inhibitor 2                                      |
| 1,092 | ENSG00000159840 | ZYX                               | zyxin                                                  | 1,525 | ENSG00000163235 | TGFA         | transforming growth factor alpha                                       |
|       |                 |                                   |                                                        | 3,398 | ENSG00000092969 | TGFB2        | transforming growth factor beta 2                                      |
|       |                 |                                   |                                                        | 1,792 | ENSG00000177426 | TGIF1        | TGFB induced factor homeobox 1                                         |
|       |                 |                                   |                                                        | 1,729 | ENSG00000118707 | TGIF2        | TGFB induced factor homeobox 2                                         |
|       |                 |                                   |                                                        | 2,103 | ENSG00000137801 | THBS1        | thrombospondin 1                                                       |
|       |                 |                                   |                                                        | 1,089 | ENSG00000095418 | THRAP3       | thyroid hormone receptor associated protein 3                          |
|       |                 |                                   |                                                        | 1,743 | ENSG00000187720 | THSD4        | thrombospondin type 1 domain containing 4                              |
|       |                 |                                   |                                                        | 1,884 | ENSG00000146426 | TIM2         | T-cell lymphoma invasion and metastasis 2                              |
|       |                 |                                   |                                                        | 2,266 | ENSG00000127666 | TICAM1       | toll like receptor adaptor molecule 1                                  |
|       |                 |                                   |                                                        | 1,213 | ENSG00000142910 | TINAGL1      | tubulointerstitial nephritis antigen like 1                            |
|       |                 |                                   |                                                        | 2,119 | ENSG00000163659 | TIPARP       | TCDD inducible poly(ADP-ribose) polymerase                             |
|       |                 |                                   |                                                        | 2,157 | ENSG00000104067 | TIP1         | tight junction protein 1                                               |
|       |                 |                                   |                                                        | 2,941 | ENSG00000119139 | TIP2         | tight junction protein 2                                               |
|       |                 |                                   |                                                        | 1,827 | ENSG00000186781 | TLE1         | transducin like enhancer of split 1                                    |
|       |                 |                                   |                                                        | 1,556 | ENSG00000066571 | TLE2         | transducin like enhancer of split 2                                    |
|       |                 |                                   |                                                        | 1,885 | ENSG00000106829 | TLE4         | transducin like enhancer of split 4                                    |
|       |                 |                                   |                                                        | 1,366 | ENSG00000187554 | TLRS         | toll like receptor 5                                                   |
|       |                 |                                   |                                                        | 3,864 | ENSG00000169908 | TM4SF1       | transmembrane 4 L six family member 1                                  |
|       |                 |                                   |                                                        | 1,763 | ENSG00000103534 | TMCS         | transmembrane channel like 5                                           |
|       |                 |                                   |                                                        | 1,651 | ENSG00000113069 | TM2C2        | transmembrane and coiled-coil domain family 2                          |
|       |                 |                                   |                                                        | 1,950 | ENSG00000090618 | TMEM132A     | transmembrane protein 132A                                             |
|       |                 |                                   |                                                        | 3,053 | ENSG00000181264 | TMEM136      | transmembrane protein 136                                              |
|       |                 |                                   |                                                        | 2,496 | ENSG00000249992 | TMEM158      | transmembrane protein 158 (gene/pseudogene)                            |
|       |                 |                                   |                                                        | 1,053 | ENSG00000152128 | TMEM163      | transmembrane protein 163                                              |
|       |                 |                                   |                                                        | 2,497 | ENSG00000157111 | TMEM171      | transmembrane protein 171                                              |
|       |                 |                                   |                                                        | 1,279 | ENSG00000115485 | TMEM184A     | transmembrane protein 184A                                             |
|       |                 |                                   |                                                        | 1,115 | ENSG00000198792 | TMEM184B     | transmembrane protein 184B                                             |
|       |                 |                                   |                                                        | 1,245 | ENSG00000226479 | TMEM185B     | transmembrane protein 185B                                             |
|       |                 |                                   |                                                        | 1,173 | ENSG00000182796 | TMEM198B     | transmembrane protein 198B (pseudogene)                                |
|       |                 |                                   |                                                        | 1,39  | ENSG00000135048 | TMEM2        | transmembrane protein 2                                                |
|       |                 |                                   |                                                        | 1,662 | ENSG00000186329 | TMEM212      | transmembrane protein 212                                              |
|       |                 |                                   |                                                        | 1,669 | ENSG00000172738 | TMEM217      | transmembrane protein 217                                              |
|       |                 |                                   |                                                        | 2,881 | ENSG00000202481 | TMEM256-PLUS | TMEM256-PLUS                                                           |
|       |                 |                                   |                                                        | 1,426 | ENSG00000182107 | TMEM308      | transmembrane protein 308                                              |
|       |                 |                                   |                                                        | 1,013 | ENSG00000170876 | TMEM43       | transmembrane protein 43                                               |
|       |                 |                                   |                                                        | 1,998 | ENSG00000171729 | TMEM51       | transmembrane protein 51                                               |
|       |                 |                                   |                                                        | 1,202 | ENSG00000121900 | TMEM54       | transmembrane protein 54                                               |
|       |                 |                                   |                                                        | 1,347 | ENSG00000143001 | TMEM61       | transmembrane protein 61                                               |
|       |                 |                                   |                                                        | 1,674 | ENSG00000186187 | TMEM63A      | transmembrane protein 63A                                              |
|       |                 |                                   |                                                        | 1,134 | ENSG00000137103 | TMEM88       | transmembrane protein 88                                               |
|       |                 |                                   |                                                        | 1,727 | ENSG00000137747 | TMPRSS13     | transmembrane protease, serine 13                                      |
|       |                 |                                   |                                                        | 1,738 | ENSG00000184012 | TMPRSS2      | transmembrane protease, serine 2                                       |
|       |                 |                                   |                                                        | 2,076 | ENSG00000160183 | TMPRSS3      | transmembrane protease, serine 3                                       |
|       |                 |                                   |                                                        | 2,187 | ENSG00000041982 | TNRC2        | tenascin C                                                             |
|       |                 |                                   |                                                        | 2,754 | ENSG00000185215 | TNFAIP2      | TNF alpha induced protein 2                                            |
|       |                 |                                   |                                                        | 4,536 | ENSG00000118503 | TNFAIP3      | TNF alpha induced protein 3                                            |
|       |                 |                                   |                                                        | 1,29  | ENSG00000145779 | TNFAIP8      | TNF alpha induced protein 8                                            |
|       |                 |                                   |                                                        | 2,629 | ENSG00000104689 | TNFRSF10A    | TNF receptor superfamily member 10a                                    |
|       |                 |                                   |                                                        | 2,615 | ENSG00000120889 | TNFRSF10B    | TNF receptor superfamily member 10b                                    |
|       |                 |                                   |                                                        | 3,237 | ENSG00000173530 | TNFRSF10D    | TNF receptor superfamily member 10d                                    |
|       |                 |                                   |                                                        | 2,095 | ENSG00000006327 | TNFRSF12A    | TNF receptor superfamily member 12a                                    |
|       |                 |                                   |                                                        | 2,398 | ENSG00000127863 | TNFRSF19     | TNF receptor superfamily member 19                                     |
|       |                 |                                   |                                                        | 2,082 | ENSG00000146072 | TNFRSF21     | TNF receptor superfamily member 21                                     |
|       |                 |                                   |                                                        | 1,049 | ENSG00000049249 | TNFRSF9      | TNF receptor superfamily member 9                                      |
|       |                 |                                   |                                                        | 3,095 | ENSG00000125657 | TNFSF9       | TNF superfamily member 9                                               |
|       |                 |                                   |                                                        | 1,048 | ENSG00000145901 | TNIP1        | TNFAIP3 interacting protein 1                                          |
|       |                 |                                   |                                                        | 1,034 | ENSG00000173273 | TNKS         | tankyrase                                                              |
|       |                 |                                   |                                                        | 1,704 | ENSG00000149115 | TNKS1BP1     | tankyrase 1 binding protein 1                                          |
|       |                 |                                   |                                                        | 1,516 | ENSG00000183864 | TOR2         | transducer of ERBB2, 2                                                 |
|       |                 |                                   |                                                        | 1,971 | ENSG00000025772 | TOMM34       | translocase of outer mitochondrial membrane 34                         |
|       |                 |                                   |                                                        | 1,495 | ENSG00000198900 | TOP1         | topoisomerase (DNA) 1                                                  |
|       |                 |                                   |                                                        | 1,25  | ENSG00000103460 | TOX3         | TOX high mobility group box family member 3                            |
|       |                 |                                   |                                                        | 1,359 | ENSG00000067369 | TSP3BP1      | tumor protein p53 binding protein 1                                    |
|       |                 |                                   |                                                        | 3,398 | ENSG00000143514 | TSP3BP2      | tumor protein p53 binding protein 2                                    |
|       |                 |                                   |                                                        | 1,147 | ENSG00000115129 | TSP3I3       | tumor protein p53 inducible protein 3                                  |
|       |                 |                                   |                                                        | 2,939 | ENSG00000146242 | TPBG         | trophoblast glycoprotein                                               |
|       |                 |                                   |                                                        | 1,145 | ENSG00000167460 | TPM4         | tropomyosin 4                                                          |
|       |                 |                                   |                                                        | 1,685 | ENSG00000171368 | TPPP         | tubulin polymerization promoting protein                               |
|       |                 |                                   |                                                        | 2,608 | ENSG00000159713 | TPPP3        | tubulin polymerization promoting protein family member 3               |
|       |                 |                                   |                                                        | 1,103 | ENSG00000136527 | TRAF2B       | transformer 2 beta homolog                                             |
|       |                 |                                   |                                                        | 3,207 | ENSG00000056558 | TRAF1        | TNF receptor associated factor 1                                       |
|       |                 |                                   |                                                        | 1,371 | ENSG00000086972 | TRAF3IP2     | TRAF3 interacting protein 2                                            |
|       |                 |                                   |                                                        | 1,333 | ENSG00000182606 | TRAK1        | trafficking kinesin protein 1                                          |
|       |                 |                                   |                                                        | 3,439 | ENSG00000173334 | TRIB1        | tribbles pseudokinase 1                                                |
|       |                 |                                   |                                                        | 1,106 | ENSG00000130726 | TRIM28       | tripartite motif containing 28                                         |
|       |                 |                                   |                                                        | 3,172 | ENSG00000117699 | TRIM29       | tripartite motif containing 29                                         |
|       |                 |                                   |                                                        | 1,032 | ENSG00000107323 | TRIM         |                                                                        |

|       |                  |                 |                                                                             |
|-------|------------------|-----------------|-----------------------------------------------------------------------------|
| 1,682 | ENSG00000125733  | TRIP10          | thyroid hormone receptor interactor 10                                      |
| 1,03  | ENSG00000104907  | TRMT1           | tRNA methyltransferase 1                                                    |
| 1,706 | ENSG00000253368  | TRNP1           | TMF1-regulated nuclear protein 1                                            |
| 1,078 | ENSG00000165689  | TSC1            | tuberous sclerosis 1                                                        |
| 1,187 | ENSG00000103197  | TSC2            | tuberous sclerosis 2                                                        |
| 3,235 | ENSG00000196428  | TSC2D2          | TSC2 domain family member 2                                                 |
| 1,781 | ENSG00000099282  | TSPAN15         | tetraspanin 15                                                              |
| 1,595 | ENSG00000005379  | TSPDAP1         | TSPD associated protein 1                                                   |
| 1,74  | ENSG00000214021  | TTL3            | tubulin tyrosine ligase like 3                                              |
| 1,267 | ENSG00000185912  | TTL4            | tubulin tyrosine ligase like 4                                              |
| 1,022 | ENSG00000167552  | TUBA1A          | tubulin alpha 1a                                                            |
| 2,392 | ENSG00000167553  | TUBA1C          | tubulin alpha 1c                                                            |
| 1,63  | ENSG00000137267  | TUBB2A          | tubulin beta 2A class Ila                                                   |
| 1,853 | ENSG00000137285  | TUBB2B          | tubulin beta 2B class Iib                                                   |
| 1,915 | ENSG00000188229  | TUBB4B          | tubulin beta 4B class IVb                                                   |
| 1,518 | ENSG00000176014  | TUBB6           | tubulin beta 6 class V                                                      |
| 1,178 | ENSG00000128159  | TUBGCP6         | tubulin gamma complex associated protein 6                                  |
| 2,421 | ENSG00000143367  | TUFT1           | tuftelin 1                                                                  |
| 1,059 | ENSG00000078246  | TULP3           | tubby like protein 3                                                        |
| 1,326 | ENSG000000086712 | TXLNG           | taxilin gamma                                                               |
| 1,644 | ENSG00000198431  | TXNRD1          | thioredoxin reductase 1                                                     |
| 1,1   | ENSG00000165006  | UBAP1           | ubiquitin associated protein 1                                              |
| 1,24  | ENSG00000171073  | UBAP2           | ubiquitin associated protein 2                                              |
| 1,161 | ENSG00000143569  | UBAP2L          | ubiquitin associated protein 2 like                                         |
| 1,22  | ENSG00000154127  | UBASH3B         | ubiquitin associated and SH3 domain containing 8                            |
| 2,854 | ENSG00000150991  | UBC             | ubiquitin C                                                                 |
| 1,53  | ENSG00000072401  | UBE2D1          | ubiquitin conjugating enzyme E2 D1                                          |
| 1,854 | ENSG00000186591  | UBE2H           | ubiquitin conjugating enzyme E2 H                                           |
| 2,06  | ENSG00000108106  | UBE2S           | ubiquitin conjugating enzyme E2 S                                           |
| 1,215 | ENSG00000188021  | UBQLN2          | ubiquitin 2                                                                 |
| 1,329 | ENSG00000158062  | UBXN11          | UBX domain protein 11                                                       |
| 2,603 | ENSG00000214049  | UCA1            | urothelial cancer associated 1 (non-protein coding)                         |
| 1,953 | ENSG00000148154  | UGCG            | UDP-glucose ceramide glucosyltransferase                                    |
| 1,916 | ENSG00000174607  | UGT8            | UDP glycosyltransferase 8                                                   |
| 1,03  | ENSG00000131015  | ULBP2           | UL16 binding protein 2                                                      |
| 1,369 | ENSG00000131019  | ULBP3           | UL16 binding protein 3                                                      |
| 1,322 | ENSG00000005007  | UPF1            | UPF1, RNA helicase and ATPase                                               |
| 1,117 | ENSG00000114638  | UPK1B           | uropodin 1B                                                                 |
| 1,547 | ENSG00000106608  | URGPC           | upregulator of cell proliferation                                           |
| 1,703 | ENSG00000006611  | USH1C           | USH1 protein network component harmonin                                     |
| 1,452 | ENSG00000102226  | USP11           | ubiquitin specific peptidase 11                                             |
| 1,511 | ENSG00000132484  | USP12           | ubiquitin specific peptidase 12                                             |
| 1,041 | ENSG00000124422  | USP22           | ubiquitin specific peptidase 22                                             |
| 1,461 | ENSG00000170185  | USP38           | ubiquitin specific peptidase 38                                             |
| 1,309 | ENSG00000106346  | USP42           | ubiquitin specific peptidase 42                                             |
| 2,068 | ENSG00000154914  | USP43           | ubiquitin specific peptidase 43                                             |
| 1,125 | ENSG00000170242  | USP47           | ubiquitin specific peptidase 47                                             |
| 1,283 | ENSG00000148429  | USPNL           | USPN N-terminal like                                                        |
| 1,216 | ENSG00000132952  | USPL1           | ubiquitin specific peptidase like 1                                         |
| 1,39  | ENSG00000168140  | VASN            | vasorin                                                                     |
| 1,011 | ENSG00000125753  | VASP            | vasodilator-stimulated phosphoprotein                                       |
| 1,827 | ENSG00000112715  | VEGFA           | vascular endothelial growth factor A                                        |
| 1,173 | ENSG000001917415 | VEPH1           | ventricular zone expressed PH domain containing 1                           |
| 1,476 | ENSG00000113541  | VEZF1           | vascular endothelial zinc finger 1                                          |
| 1,989 | ENSG00000206538  | VGLL3           | vestigial like family member 3                                              |
| 1,809 | ENSG00000127831  | VIL1            | villin 1                                                                    |
| 1,351 | ENSG00000136059  | VILL            | villin like                                                                 |
| 3,118 | ENSG00000139722  | VPS37B          | VPS37B, ESCRT-I subunit                                                     |
| 1,01  | ENSG00000167987  | VPS37C          | VPS37C, ESCRT-I subunit                                                     |
| 1,117 | ENSG00000019102  | VSG2            | V-set and immunoglobulin domain containing 2                                |
| 1,239 | ENSG00000139821  | VSTM2L          | V-set and transmembrane domain containing 2 like                            |
| 1,777 | ENSG00000134258  | VTG1            | V-set domain containing T-cell activation inhibitor 1                       |
| 2,033 | ENSG00000199990  | VRNA1-1         | vault RNA 1-1                                                               |
| 7,264 | ENSG00000202515  | VRNA1-3         | vault RNA 1-3                                                               |
| 1,124 | ENSG000000062650 | WAPL            | WAPL cohesin release factor                                                 |
| 2,275 | ENSG00000202732  | WASH7P          | WAS protein family homolog 7 pseudogene                                     |
| 1,139 | ENSG00000009930  | WASHC2A/WASHC2A | WASH complex subunit 2C                                                     |
| 1,631 | ENSG00000184465  | WDR27           | WD repeat domain 27                                                         |
| 1,029 | ENSG00000163811  | WDR43           | WD repeat domain 43                                                         |
| 1,849 | ENSG000000085433 | WDR47           | WD repeat domain 47                                                         |
| 1,862 | ENSG00000178252  | WDR6            | WD repeat domain 6                                                          |
| 1,543 | ENSG00000161996  | WDR90           | WD repeat domain 90                                                         |
| 1,069 | ENSG00000105875  | WDR91           | WD repeat domain 91                                                         |
| 3,748 | ENSG00000166483  | WEE1            | WEE1 G2 checkpoint kinase                                                   |
| 2,171 | ENSG00000101443  | WFDC2           | WAP 40-disulfide core domain 2                                              |
| 1,212 | ENSG00000156232  | WHAMM           | WAS protein homolog associated with actin, golgi membranes and microtubules |
| 1,265 | ENSG00000095397  | WHRN            | whirlin                                                                     |
| 2,104 | ENSG00000165238  | WNK2            | WNK lysine deficient protein kinase 2                                       |
| 1,882 | ENSG00000103525  | WNT10A          | Wnt family member 10A                                                       |
| 1,549 | ENSG00000188064  | WNT7B           | Wnt family member 7B                                                        |
| 1,812 | ENSG00000109046  | WSB1            | WD repeat and SOCS box containing 1                                         |
| 1,107 | ENSG00000146457  | WTAP            | WT1 associated protein                                                      |
| 1,816 | ENSG00000113645  | WWC1            | WW and C2 domain containing 1                                               |
| 1,746 | ENSG00000184808  | WWTR1           | WW domain containing transcription regulator 1                              |
| 2,344 | ENSG00000180667  | YOD1            | YOD1 deubiquitinase                                                         |
| 1,309 | ENSG00000175155  | YPEL2           | ypippe like 2                                                               |
| 1,622 | ENSG00000164924  | YWHAZ           | tyrosine 3-monooxygenase/rythropan 5-monooxygenase activation protein zeta  |
| 1,804 | ENSG00000205189  | ZBTB10          | zinc finger and BTB domain containing 10                                    |
| 1,069 | ENSG00000109906  | ZBTB16          | zinc finger and BTB domain containing 16                                    |
| 2,177 | ENSG00000181472  | ZBTB2           | zinc finger and BTB domain containing 2                                     |
| 2,161 | ENSG00000181722  | ZBTB20          | zinc finger and BTB domain containing 20                                    |
| 1,718 | ENSG00000171125  | ZBTB34          | zinc finger and BTB domain containing 34                                    |
| 1,008 | ENSG00000184677  | ZBTB40          | zinc finger and BTB domain containing 40                                    |
| 2,962 | ENSG00000169155  | ZBTB43          | zinc finger and BTB domain containing 43                                    |
| 1,317 | ENSG00000168795  | ZBTB5           | zinc finger and BTB domain containing 5                                     |
| 1,215 | ENSG00000178951  | ZBTB7A          | zinc finger and BTB domain containing 7A                                    |
| 4,645 | ENSG00000163874  | ZC3H12A         | zinc finger CCH-type containing 12A                                         |
| 1,307 | ENSG00000149289  | ZC3H12C         | zinc finger CCH-type containing 12C                                         |
| 1,857 | ENSG00000105939  | ZC3HAV1         | zinc finger CCH-type containing, antiviral 1                                |
| 1,416 | ENSG00000083223  | ZCCHC6          | zinc finger CCH-type containing 6                                           |
| 1,544 | ENSG00000033030  | ZCCHC8          | zinc finger CCH-type containing 8                                           |
| 1,033 | ENSG00000159714  | ZDHC1           | zinc finger DHHC-type containing 1                                          |
| 1,952 | ENSG00000178381  | ZFAND2A         | zinc finger AN1-type containing 2A                                          |
| 1,037 | ENSG00000107372  | ZFAND5          | zinc finger AN1-type containing 5                                           |
| 1,571 | ENSG00000133858  | ZFC3H1          | zinc finger C3H1-type containing                                            |
| 2,902 | ENSG00000128016  | ZFP36           | ZFP36 ring finger protein                                                   |
| 1,324 | ENSG00000185650  | ZFP36L1         | ZFP36 ring finger protein like 1                                            |
| 2,143 | ENSG00000162078  | ZG16B           | zymogen granule protein 16B                                                 |
| 1,35  | ENSG00000108175  | ZMIZ1           | zinc finger MIZ-type containing 1                                           |
| 1,396 | ENSG00000122515  | ZMIZ2           | zinc finger MIZ-type containing 2                                           |
| 1,151 | ENSG0000013762   | ZNF134          | zinc finger protein 134                                                     |
| 1,018 | ENSG00000115568  | ZNF142          | zinc finger protein 142                                                     |
| 4,119 | ENSG00000197279  | ZNF165          | zinc finger protein 165                                                     |
| 1,013 | ENSG00000166261  | ZNF202          | zinc finger protein 202                                                     |
| 1,696 | ENSG00000171940  | ZNF217          | zinc finger protein 217                                                     |
| 1,212 | ENSG00000165804  | ZNF219          | zinc finger protein 219                                                     |
| 1,268 | ENSG0000013454   | ZNF256          | zinc finger protein 256                                                     |
| 1,56  | ENSG00000185947  | ZNF267          | zinc finger protein 267                                                     |
| 1,417 | ENSG00000162702  | ZNF281          | zinc finger protein 281                                                     |
| 2,826 | ENSG00000170684  | ZNF296          | zinc finger protein 296                                                     |
| 1,405 | ENSG00000130803  | ZNF317          | zinc finger protein 317                                                     |
| 1,479 | ENSG00000198026  | ZNF335          | zinc finger protein 335                                                     |
| 1,031 | ENSG00000125746  | ZNF384          | zinc finger protein 384                                                     |
| 1,353 | ENSG00000162098  | ZNF394          | zinc finger protein 394                                                     |
| 1,238 | ENSG00000125945  | ZNF436          | zinc finger protein 436                                                     |
| 1,014 | ENSG00000083838  | ZNF446          | zinc finger protein 446                                                     |
| 1,197 | ENSG00000144026  | ZNF514          | zinc finger protein 514                                                     |
| 1,188 | ENSG00000101493  | ZNF516          | zinc finger protein 516                                                     |
| 1,864 | ENSG00000105732  | ZNF574          | zinc finger protein 574                                                     |
| 1,668 | ENSG00000166716  | ZNF592          | zinc finger protein 592                                                     |
| 1,232 | ENSG00000168916  | ZNF608          | zinc finger protein 608                                                     |
| 1,001 | ENSG00000102870  | ZNF629          | zinc finger protein 629                                                     |
| 1,464 | ENSG00000171163  | ZNF692          | zinc finger protein 692                                                     |
| 1,04  | ENSG00000140548  | ZNF710          | zinc finger protein 710                                                     |
| 1,705 | ENSG00000147180  | ZNF711          | zinc finger protein 711                                                     |

|       |                 |           |                                                        |
|-------|-----------------|-----------|--------------------------------------------------------|
| 1,01  | ENSG00000178665 | ZNF713    | zinc finger protein 713                                |
| 1,645 | ENSG00000124201 | ZNFX1     | zinc finger NFX1-type containing 1                     |
| 2,675 | ENSG00000219891 | ZSCAN12P1 | zinc finger and SCAN domain containing 12 pseudogene 1 |
| 1,29  | ENSG00000121413 | ZSCAN18   | zinc finger and SCAN domain containing 18              |
| 2,838 | ENSG00000132003 | ZSWIM4    | zinc finger SWIM-type containing 4                     |
| 1,924 | ENSG00000130449 | ZSWIM6    | zinc finger SWIM-type containing 6                     |
| 1,462 | ENSG00000198205 | ZXA       | zinc finger, X-linked, duplicated A                    |
| 2,213 | ENSG00000198455 | ZXB       | zinc finger, X-linked, duplicated B                    |
| 1,328 | ENSG00000159840 | ZYX       | zyxin                                                  |



**Genes enriched in SP**

Fold change vs liver

| ID    | Symbol          | Entrez Gene Name        |                                                                 |
|-------|-----------------|-------------------------|-----------------------------------------------------------------|
| 1,158 | ENSG00000107331 | ABCA2                   | ATP binding cassette subfamily A member 2                       |
| 1,918 | ENSG00000085563 | ABCB1                   | ATP binding cassette subfamily B member 1                       |
| 1,491 | ENSG00000103222 | ABCC1                   | ATP binding cassette subfamily C member 1                       |
| 1,482 | ENSG00000124574 | ABCC10                  | ATP binding cassette subfamily C member 10                      |
| 1,661 | ENSG00000108846 | ABCC3                   | ATP binding cassette subfamily C member 3                       |
| 1,237 | ENSG00000125257 | ABCC4                   | ATP binding cassette subfamily C member 4                       |
| 1,23  | ENSG00000097007 | ABL1                    | ABL proto-oncogene 1, non-receptor tyrosine kinase              |
| 1,172 | ENSG00000099204 | ABLIM1                  | actin binding LIM protein 1                                     |
| 1,051 | ENSG00000159842 | ABR                     | active BCR-related                                              |
| 1,262 | ENSG00000087085 | ACHE                    | acetylcholinesterase (Cartwright blood group)                   |
| 1,335 | ENSG00000154930 | ACSS1                   | acyl-CoA synthetase short-chain family member 1                 |
| 1,062 | ENSG00000119640 | ACYP1                   | acylphosphatase 1                                               |
| 1,184 | ENSG00000137845 | ADAM10                  | ADAM metalloproteinase domain 10                                |
| 1,088 | ENSG00000042980 | ADAM28                  | ADAM metalloproteinase domain 28                                |
| 1,216 | ENSG00000151651 | ADAM8                   | ADAM metalloproteinase domain 8                                 |
| 1,702 | ENSG00000168615 | ADAM9                   | ADAM metalloproteinase domain 9                                 |
| 1,689 | ENSG00000105963 | ADAP1                   | ArfGAP with dual PH domains 1                                   |
| 1,433 | ENSG00000174233 | ADCY6                   | adenylate cyclase 6                                             |
| 1,35  | ENSG00000155897 | ADCY8                   | adenylate cyclase 8                                             |
| 1,564 | ENSG00000205336 | ADGRG1                  | adhesion G protein-coupled receptor G1                          |
| 1,794 | ENSG00000148926 | ADM                     | adrenomedullin                                                  |
| 1,756 | ENSG00000163485 | ADORA1                  | adenosine A1 receptor                                           |
| 1,178 | ENSG00000150594 | ADRA2A                  | adrenoceptor alpha 2A                                           |
| 1,91  | ENSG00000181026 | AEN                     | apoptosis enhancing nuclease                                    |
| 1,306 | ENSG00000196526 | AFAP1                   | actin filament associated protein 1                             |
| 2,08  | ENSG00000130396 | AFDN                    | afadin, adherens junction formation factor                      |
| 1,662 | ENSG00000157985 | AGAP1                   | ArfGAP with GTPase domain, ankyrin repeat and PH domain 1       |
| 1,036 | ENSG00000204149 | AGAP6 (includes others) | ArfGAP with GTPase domain, ankyrin repeat and PH domain 5       |
| 1,005 | ENSG00000026652 | AGPAT4                  | 1-acylglycerol-3-phosphate O-acyltransferase 4                  |
| 1,883 | ENSG00000106541 | AGR2                    | anterior gradient 2, protein disulphide isomerase family member |
| 1,029 | ENSG00000173467 | AGR3                    | anterior gradient 3, protein disulphide isomerase family member |
| 1,211 | ENSG00000135541 | AHI1                    | Abelson helper integration site 1                               |
| 1,057 | ENSG00000106546 | AHR                     | aryl hydrocarbon receptor                                       |
| 1,673 | ENSG00000173209 | AHSA2                   | activator of HSP90 ATPase homolog 2                             |
| 1,213 | ENSG00000196581 | AJAP1                   | adherens junctions associated protein 1                         |
| 1,22  | ENSG00000140057 | AK7                     | adenylate kinase 7                                              |
| 1,425 | ENSG00000197976 | AKAP17A                 | A-kinase anchoring protein 17A                                  |
| 2,002 | ENSG00000118507 | AKAP7                   | A-kinase anchoring protein 7                                    |
| 1,385 | ENSG00000011243 | AKAP8L                  | A-kinase anchoring protein 8 like                               |
| 1,708 | ENSG00000128918 | ALDH1A2                 | aldehyde dehydrogenase 1 family member A2                       |
| 2,099 | ENSG00000196711 | ALKAL1                  | ALK and LTK ligand 1                                            |
| 1,285 | ENSG00000189292 | ALKAL2                  | ALK and LTK ligand 2                                            |
| 1,324 | ENSG00000262943 | ALOX12P2                | arachidonate 12-lipoxygenase pseudogene 2                       |
| 1,503 | ENSG00000178038 | ALS2CL                  | ALS2 C-terminal like                                            |
| 2,674 | ENSG00000114019 | AMOTL2                  | angiomotin like 2                                               |
| 1,548 | ENSG00000240038 | AMY2B                   | amylase, alpha 2B (pancreatic)                                  |
| 1,242 | ENSG00000254996 | ANKHD1/ANKHD1-EIF4EBP3  | ankyrin repeat and KH domain containing 1                       |
| 1,107 | ENSG00000176915 | ANKLE2                  | ankyrin repeat and LEM domain containing 2                      |
| 1,163 | ENSG00000088448 | ANKRD10                 | ankyrin repeat domain 10                                        |
| 1,149 | ENSG00000167522 | ANKRD11                 | ankyrin repeat domain 11                                        |
| 2,027 | ENSG00000180071 | ANKRD18A                | ankyrin repeat domain 18A                                       |
| 1,334 | ENSG00000230453 | ANKRD18B                | ankyrin repeat domain 18B                                       |
| 2,001 | ENSG00000164236 | ANKRD33B                | ankyrin repeat domain 33B                                       |
| 1,806 | ENSG00000135976 | ANKRD36                 | ankyrin repeat domain 36                                        |
| 1,508 | ENSG00000196912 | ANKRD36B                | ankyrin repeat domain 36B                                       |
| 1,223 | ENSG00000137494 | ANKRD42                 | ankyrin repeat domain 42                                        |
| 1,052 | ENSG00000163516 | ANKZF1                  | ankyrin repeat and zinc finger domain containing 1              |
| 1,624 | ENSG00000185101 | ANO9                    | anoctamin 9                                                     |
| 1,171 | ENSG00000122359 | ANXA11                  | annexin A11                                                     |
| 2,045 | ENSG00000104537 | ANXA13                  | annexin A13                                                     |
| 2,056 | ENSG00000138772 | ANXA3                   | annexin A3                                                      |
| 1,66  | ENSG00000196975 | ANXA4                   | annexin A4                                                      |
| 1,17  | ENSG00000143412 | ANXA9                   | annexin A9                                                      |
| 2,077 | ENSG00000213983 | AP1G2                   | adaptor related protein complex 1 gamma 2 subunit               |
| 1,969 | ENSG00000129354 | AP1M2                   | adaptor related protein complex 1 mu 2 subunit                  |
| 1,318 | ENSG00000154856 | APCDD1                  | APC down-regulated 1                                            |
| 1,61  | ENSG00000105290 | APLP1                   | amyloid beta precursor like protein 1                           |
| 2,663 | ENSG00000179750 | APOBEC3B                | apolipoprotein B mRNA editing enzyme catalytic subunit 3B       |
| 1,653 | ENSG00000047365 | ARAP2                   | ArfGAP with RhoGAP domain, ankyrin repeat and PH domain 2       |
| 4,291 | ENSG00000198576 | ARC                     | activity regulated cytoskeleton associated protein              |
| 3,318 | ENSG00000109321 | AREG                    | amphiregulin                                                    |
| 1,344 | ENSG00000134884 | ARGLU1                  | arginine and glutamate rich 1                                   |
| 1,283 | ENSG00000138639 | ARHGAP24                | Rho GTPase activating protein 24                                |
| 1,263 | ENSG00000145819 | ARHGAP26                | Rho GTPase activating protein 26                                |
| 2,026 | ENSG00000248405 | ARHGAP8/PRRS-ARHGAP8    | Rho GTPase activating protein 8                                 |
| 1,565 | ENSG00000130762 | ARHGEF16                | Rho guanine nucleotide exchange factor 16                       |
| 1,058 | ENSG00000142632 | ARHGEF19                | Rho guanine nucleotide exchange factor 19                       |
| 1,454 | ENSG00000236699 | ARHGEF38                | Rho guanine nucleotide exchange factor 38                       |

|       |                  |              |                                                               |
|-------|------------------|--------------|---------------------------------------------------------------|
| 1,406 | ENSG00000165801  | ARHGEF40     | Rho guanine nucleotide exchange factor 40                     |
| 1,171 | ENSG00000050327  | ARHGEF5      | Rho guanine nucleotide exchange factor 5                      |
| 1,588 | ENSG00000150347  | ARID5B       | AT-rich interaction domain 5B                                 |
| 3,468 | ENSG00000179674  | ARL14        | ADP ribosylation factor like GTPase 14                        |
| 1,124 | ENSG00000122644  | ARL4A        | ADP ribosylation factor like GTPase 4A                        |
| 1,746 | ENSG00000188042  | ARL4C        | ADP ribosylation factor like GTPase 4C                        |
| 1,329 | ENSG00000196503  | ARL9         | ADP ribosylation factor like GTPase 9                         |
| 1,654 | ENSG00000135931  | ARMC9        | armadillo repeat containing 9                                 |
| 1,8   | ENSG00000172379  | ARNT2        | aryl hydrocarbon receptor nuclear translocator 2              |
| 1,146 | ENSG00000029153  | ARNTL2       | aryl hydrocarbon receptor nuclear translocator like 2         |
| 1,388 | ENSG00000250151  | ARPC4-TLL3   | ARPC4-TLL3 readthrough                                        |
| 1,304 | ENSG00000105643  | ARRDC2       | arrestin domain containing 2                                  |
| 1,719 | ENSG00000180801  | ARSJ         | arylsulfatase family member J                                 |
| 1,337 | ENSG00000065802  | ASB1         | ankyrin repeat and SOCS box containing 1                      |
| 1,073 | ENSG00000116539  | ASH1L        | ASH1 like histone lysine methyltransferase                    |
| 1,023 | ENSG00000070669  | ASNS         | asparagine synthetase (glutamine-hydrolyzing)                 |
| 1,832 | ENSG00000174939  | ASPHD1       | aspartate beta-hydroxylase domain containing 1                |
| 1,572 | ENSG00000148219  | ASTN2        | astrotactin 2                                                 |
| 4,237 | ENSG00000162772  | ATF3         | activating transcription factor 3                             |
| 1,063 | ENSG00000068650  | ATP11A       | ATPase phospholipid transporting 11A                          |
| 1,325 | ENSG00000127249  | ATP13A4      | ATPase 13A4                                                   |
| 1,789 | ENSG00000163399  | ATP1A1       | ATPase Na+/K+ transporting subunit alpha 1                    |
| 1,356 | ENSG00000203865  | ATP1A1-AS1   | ATP1A1 antisense RNA 1                                        |
| 1,914 | ENSG00000248919  | ATP5J2-PTCD1 | ATP5J2-PTCD1 readthrough                                      |
| 1,256 | ENSG000000054793 | ATP9A        | ATPase phospholipid transporting 9A (putative)                |
| 1,227 | ENSG00000204842  | ATXN2        | ataxin 2                                                      |
| 1,267 | ENSG00000168488  | ATXN2L       | ataxin 2 like                                                 |
| 1,377 | ENSG00000184809  | B3GALT5-AS1  | B3GALT5 antisense RNA 1                                       |
| 1,025 | ENSG00000179913  | B3GNT3       | UDP-GlcNAc:betaGal beta-1,3-N-acetylglucosaminyltransferase 3 |
| 3,022 | ENSG00000176597  | B3GNT5       | UDP-GlcNAc:betaGal beta-1,3-N-acetylglucosaminyltransferase 5 |
| 1,236 | ENSG00000156966  | B3GNT7       | UDP-GlcNAc:betaGal beta-1,3-N-acetylglucosaminyltransferase 7 |
| 1,677 | ENSG00000139044  | B4GALNT3     | beta-1,4-N-acetyl-galactosaminyltransferase 3                 |
| 1,177 | ENSG00000158470  | B4GALT5      | beta-1,4-galactosyltransferase 5                              |
| 1,355 | ENSG00000182240  | BACE2        | beta-site APP-cleaving enzyme 2                               |
| 5,482 | ENSG00000151929  | BAG3         | BCL2 associated athanogene 3                                  |
| 1,245 | ENSG00000006453  | BAIAP2L1     | BAI1 associated protein 2 like 1                              |
| 1,253 | ENSG00000128298  | BAIAP2L2     | BAI1 associated protein 2 like 2                              |
| 2,181 | ENSG000000095739 | BAMBI        | BMP and activin membrane bound inhibitor                      |
| 1,456 | ENSG00000138376  | BARD1        | BRCA1 associated RING domain 1                                |
| 1,273 | ENSG00000043039  | BARX2        | BARX homeobox 2                                               |
| 1,716 | ENSG00000198604  | BAZ1A        | bromodomain adjacent to zinc finger domain 1A                 |
| 1,084 | ENSG00000076108  | BAZ2A        | bromodomain adjacent to zinc finger domain 2A                 |
| 1,101 | ENSG00000123636  | BAZ2B        | bromodomain adjacent to zinc finger domain 2B                 |
| 3,366 | ENSG00000105327  | BBC3         | BCL2 binding component 3                                      |
| 1,531 | ENSG000000050820 | BCAR1        | BCAR1, Cas family scaffolding protein                         |
| 1,629 | ENSG00000142867  | BCL10        | B-cell CLL/lymphoma 10                                        |
| 2,18  | ENSG00000171791  | BCL2         | BCL2, apoptosis regulator                                     |
| 1,09  | ENSG00000171552  | BCL2L1       | BCL2 like 1                                                   |
| 1,328 | ENSG00000153094  | BCL2L11      | BCL2 like 11                                                  |
| 1,588 | ENSG00000110987  | BCL7A        | BCL tumor suppressor 7A                                       |
| 1,303 | ENSG00000236824  | BCYRN1       | brain cytoplasmic RNA 1                                       |
| 1,005 | ENSG00000165626  | BEND7        | BEN domain containing 7                                       |
| 2,082 | ENSG00000133169  | BEX1         | brain expressed X-linked 1                                    |
| 1,334 | ENSG00000133134  | BEX2         | brain expressed X-linked 2                                    |
| 1,259 | ENSG00000102409  | BEX4         | brain expressed X-linked 4                                    |
| 2,7   | ENSG00000123095  | BHLHE41      | basic helix-loop-helix family member e41                      |
| 1,796 | ENSG00000122870  | BICC1        | BicC family RNA binding protein 1                             |
| 2,292 | ENSG00000162069  | BICDL2       | BICD family like cargo adaptor 2                              |
| 2,871 | ENSG00000100290  | BIK          | BCL2 interacting killer                                       |
| 2,942 | ENSG00000023445  | BIRC3        | baculoviral IAP repeat containing 3                           |
| 2,786 | ENSG00000125845  | BMP2         | bone morphogenetic protein 2                                  |
| 1,121 | ENSG00000204177  | BMS1P5       | BMS1, ribosome biogenesis factor pseudogene 5                 |
| 1,223 | ENSG00000157764  | BRAF         | B-Raf proto-oncogene, serine/threonine kinase                 |
| 1,084 | ENSG00000100425  | BRD1         | bromodomain containing 1                                      |
| 1,416 | ENSG00000141867  | BRD4         | bromodomain containing 4                                      |
| 1,286 | ENSG00000119411  | BSPRY        | B-box and SPRY domain containing                              |
| 1,208 | ENSG00000133639  | BTG1         | BTG anti-proliferation factor 1                               |
| 2,808 | ENSG00000159388  | BTG2         | BTG anti-proliferation factor 2                               |
| 1,434 | ENSG00000154640  | BTG3         | BTG anti-proliferation factor 3                               |
| 1,04  | ENSG00000176236  | C10orf111    | chromosome 10 open reading frame 111                          |
| 1,109 | ENSG00000149179  | C11orf49     | chromosome 11 open reading frame 49                           |
| 1,601 | ENSG00000109944  | C11orf63     | chromosome 11 open reading frame 63                           |
| 1,103 | ENSG00000205177  | C11orf91     | chromosome 11 open reading frame 91                           |
| 1,638 | ENSG00000235162  | C12orf75     | chromosome 12 open reading frame 75                           |
| 1,051 | ENSG00000100557  | C14orf105    | chromosome 14 open reading frame 105                          |
| 1,33  | ENSG00000140104  | C14orf79     | chromosome 14 open reading frame 79                           |
| 1,048 | ENSG00000186073  | C15orf41     | chromosome 15 open reading frame 41                           |
| 2,305 | ENSG00000188549  | C15orf52     | chromosome 15 open reading frame 52                           |
| 1,434 | ENSG00000167644  | C19orf33     | chromosome 19 open reading frame 33                           |
| 1,041 | ENSG00000105072  | C19orf44     | chromosome 19 open reading frame 44                           |
| 2,491 | ENSG00000163362  | C1orf106     | chromosome 1 open reading frame 106                           |

|       |                  |           |                                                                                  |
|-------|------------------|-----------|----------------------------------------------------------------------------------|
| 2,18  | ENSG00000182795  | C1orf116  | chromosome 1 open reading frame 116                                              |
| 1,35  | ENSG00000119280  | C1orf198  | chromosome 1 open reading frame 198                                              |
| 1,155 | ENSG00000221953  | C1orf229  | chromosome 1 open reading frame 229                                              |
| 1,646 | ENSG00000131094  | C1QL1     | complement C1q like 1                                                            |
| 1,969 | ENSG00000205502  | C2CD4B    | C2 calcium dependent domain containing 4B                                        |
| 1,189 | ENSG00000183186  | C2CD4C    | C2 calcium dependent domain containing 4C                                        |
| 1,235 | ENSG00000225556  | C2CD4D    | C2 calcium dependent domain containing 4D                                        |
| 3,777 | ENSG00000114529  | C3orf52   | chromosome 3 open reading frame 52                                               |
| 1,17  | ENSG00000181744  | C3orf58   | chromosome 3 open reading frame 58                                               |
| 1,032 | ENSG00000205129  | C4orf47   | chromosome 4 open reading frame 47                                               |
| 1,03  | ENSG00000197603  | C5orf42   | chromosome 5 open reading frame 42                                               |
| 1,138 | ENSG00000178776  | C5orf46   | chromosome 5 open reading frame 46                                               |
| 1,054 | ENSG00000188112  | C6orf132  | chromosome 6 open reading frame 132                                              |
| 3,28  | ENSG00000197261  | C6orf141  | chromosome 6 open reading frame 141                                              |
| 1,607 | ENSG00000189325  | C6orf222  | chromosome 6 open reading frame 222                                              |
| 1,243 | ENSG00000137434  | C6orf52   | chromosome 6 open reading frame 52                                               |
| 1,623 | ENSG00000176907  | C8orf4    | chromosome 8 open reading frame 4                                                |
| 1,714 | ENSG00000160345  | C9orf116  | chromosome 9 open reading frame 116                                              |
| 1,306 | ENSG00000204352  | C9orf129  | chromosome 9 open reading frame 129                                              |
| 2,169 | ENSG00000164879  | CA3       | carbonic anhydrase 3                                                             |
| 2,058 | ENSG00000107159  | CA9       | carbonic anhydrase 9                                                             |
| 1,47  | ENSG00000116161  | CACYBP    | calyculin binding protein                                                        |
| 1,096 | ENSG00000084774  | CAD       | carbamoyl-phosphate synthetase 2, aspartate transcarbamylase, and dihydroorotase |
| 1,143 | ENSG00000270419  | CAHM      | colon adenocarcinoma hypermethylated (non-protein coding)                        |
| 1,504 | ENSG00000130559  | CAMSAP1   | calmodulin regulated spectrin associated protein 1                               |
| 1,258 | ENSG00000076826  | CAMSAP3   | calmodulin regulated spectrin associated protein family member 3                 |
| 1,167 | ENSG00000108509  | CAMTA2    | calmodulin binding transcription activator 2                                     |
| 1,119 | ENSG00000042493  | CAPG      | capping actin protein, gelsolin like                                             |
| 1,333 | ENSG00000182472  | CAPN12    | calpain 12                                                                       |
| 1,114 | ENSG00000162909  | CAPN2     | calpain 2                                                                        |
| 1,383 | ENSG00000077274  | CAPN6     | calpain 6                                                                        |
| 1,669 | ENSG00000105519  | CAPS      | calcyphosine                                                                     |
| 1,097 | ENSG00000100065  | CARD10    | caspase recruitment domain family member 10                                      |
| 1,497 | ENSG00000036828  | CASR      | calcium sensing receptor                                                         |
| 2,287 | ENSG00000130940  | CASZ1     | castor zinc finger 1                                                             |
| 1,025 | ENSG00000078699  | CBFA2T2   | CBFA2/RUNX1 translocation partner 2                                              |
| 1,631 | ENSG00000141582  | CBX4      | chromobox 4                                                                      |
| 1,532 | ENSG00000183741  | CBX6      | chromobox 6                                                                      |
| 1,04  | ENSG00000158941  | CCAR2     | cell cycle and apoptosis regulator 2                                             |
| 1,226 | ENSG00000135736  | CCDC102A  | coiled-coil domain containing 102A                                               |
| 1,377 | ENSG00000167131  | CCDC103   | coiled-coil domain containing 103                                                |
| 1,38  | ENSG00000151773  | CCDC122   | coiled-coil domain containing 122                                                |
| 1,171 | ENSG00000175455  | CCDC14    | coiled-coil domain containing 14                                                 |
| 1,84  | ENSG00000163492  | CCDC141   | coiled-coil domain containing 141                                                |
| 1,126 | ENSG00000153237  | CCDC148   | coiled-coil domain containing 148                                                |
| 1,05  | ENSG00000165813  | CCDC186   | coiled-coil domain containing 186                                                |
| 1,547 | ENSG00000196118  | CCDC189   | coiled-coil domain containing 189                                                |
| 1,99  | ENSG00000159214  | CCDC24    | coiled-coil domain containing 24                                                 |
| 1,329 | ENSG00000160050  | CCDC28B   | coiled-coil domain containing 28B                                                |
| 1,595 | ENSG00000152076  | CCDC74B   | coiled-coil domain containing 74B                                                |
| 1,122 | ENSG00000105321  | CCDC9     | coiled-coil domain containing 9                                                  |
| 2,586 | ENSG00000108691  | CCL2      | C-C motif chemokine ligand 2                                                     |
| 3,477 | ENSG00000115009  | CCL20     | C-C motif chemokine ligand 20                                                    |
| 1,446 | ENSG00000151882  | CCL28     | C-C motif chemokine ligand 28                                                    |
| 2,01  | ENSG00000163660  | CCNL1     | cyclin L1                                                                        |
| 1,23  | ENSG00000221978  | CCNL2     | cyclin L2                                                                        |
| 2,679 | ENSG00000126353  | CCR7      | C-C motif chemokine receptor 7                                                   |
| 1,124 | ENSG00000117877  | CD3EAP    | CD3e molecule associated protein                                                 |
| 2,615 | ENSG00000112149  | CD83      | CD83 molecule                                                                    |
| 1,237 | ENSG00000198752  | CDC42BPB  | CDC42 binding protein kinase beta                                                |
| 1,042 | ENSG00000171219  | CDC42BPG  | CDC42 binding protein kinase gamma                                               |
| 1,138 | ENSG00000128283  | CDC42EP1  | CDC42 effector protein 1                                                         |
| 1,297 | ENSG00000179604  | CDC42EP4  | CDC42 effector protein 4                                                         |
| 2,241 | ENSG00000163814  | CDCP1     | CUB domain containing protein 1                                                  |
| 2,025 | ENSG00000039068  | CDH1      | cadherin 1                                                                       |
| 2,265 | ENSG00000113361  | CDH6      | cadherin 6                                                                       |
| 1,073 | ENSG00000008128  | CDK11A    | cyclin dependent kinase 11A                                                      |
| 1,243 | ENSG00000156345  | CDK20     | cyclin dependent kinase 20                                                       |
| 1,639 | ENSG00000124762  | CDKN1A    | cyclin dependent kinase inhibitor 1A                                             |
| 1,556 | ENSG00000129757  | CDKN1C    | cyclin dependent kinase inhibitor 1C                                             |
| 1,221 | ENSG00000168564  | CDKN2AIP  | CDKN2A interacting protein                                                       |
| 2,418 | ENSG00000147883  | CDKN2B    | cyclin dependent kinase inhibitor 2B                                             |
| 1,001 | ENSG00000109089  | CDR2L     | cerebellar degeneration related protein 2 like                                   |
| 1,655 | ENSG00000163624  | CDS1      | CDP-diaclyglycerol synthase 1                                                    |
| 2,041 | ENSG000000086548 | CEACAM6   | carcinoembryonic antigen related cell adhesion molecule 6                        |
| 1,292 | ENSG00000102901  | CENPT     | centromere protein T                                                             |
| 1,28  | ENSG00000141577  | CEP131    | centrosomal protein 131                                                          |
| 1,026 | ENSG00000121289  | CEP89     | centrosomal protein 89                                                           |
| 2,026 | ENSG00000163075  | CFAP221   | cilia and flagella associated protein 221                                        |
| 1,451 | ENSG00000226312  | CFLAR-AS1 | CFLAR antisense RNA 1                                                            |
| 2,852 | ENSG00000001626  | CFTR      | cystic fibrosis transmembrane conductance regulator                              |

|       |                  |               |                                                                                 |
|-------|------------------|---------------|---------------------------------------------------------------------------------|
| 1,256 | ENSG00000143375  | CGN           | cingulin                                                                        |
| 1,051 | ENSG00000159259  | CHAF1B        | chromatin assembly factor 1 subunit B                                           |
| 1,079 | ENSG00000153922  | CHD1          | chromodomain helicase DNA binding protein 1                                     |
| 1,951 | ENSG00000173575  | CHD2          | chromodomain helicase DNA binding protein 2                                     |
| 1,472 | ENSG00000170004  | CHD3          | chromodomain helicase DNA binding protein 3                                     |
| 1,883 | ENSG00000110721  | CHKA          | choline kinase alpha                                                            |
| 1,207 | ENSG00000203668  | CHML          | CHM like, Rab escort protein 2                                                  |
| 1,447 | ENSG00000101421  | CHMP4B        | charged multivesicular body protein 4B                                          |
| 1,867 | ENSG00000110172  | CHORDC1       | cysteine and histidine rich domain containing 1                                 |
| 1,296 | ENSG00000133019  | CHRM3         | cholinergic receptor muscarinic 3                                               |
| 1,101 | ENSG00000122863  | CHST3         | carbohydrate sulfotransferase 3                                                 |
| 1,372 | ENSG00000140835  | CHST4         | carbohydrate sulfotransferase 4                                                 |
| 1,066 | ENSG00000127586  | CHTF18        | chromosome transmission fidelity factor 18                                      |
| 1,381 | ENSG00000179862  | CITED4        | Cbp/p300 interacting transactivator with Glu/Asp rich carboxy-terminal domain 4 |
| 1,1   | ENSG00000166165  | CKB           | creatine kinase B                                                               |
| 1,044 | ENSG00000223572  | CKMT1A/CKMT1B | creatine kinase, mitochondrial 1B                                               |
| 1,875 | ENSG00000131730  | CKMT2         | creatine kinase, mitochondrial 2                                                |
| 1,145 | ENSG00000104859  | CLASRP        | CLK4 associating serine/arginine rich protein                                   |
| 3,396 | ENSG00000175505  | CLCF1         | cardiotrophin like cytokine factor 1                                            |
| 1,115 | ENSG00000114859  | CLCN2         | chloride voltage-gated channel 2                                                |
| 1,024 | ENSG000000011021 | CLCN6         | chloride voltage-gated channel 6                                                |
| 1,827 | ENSG00000163347  | CLDN1         | claudin 1                                                                       |
| 1,929 | ENSG00000134873  | CLDN10        | claudin 10                                                                      |
| 1,183 | ENSG00000253958  | CLDN23        | claudin 23                                                                      |
| 1,207 | ENSG00000184697  | CLDN6         | claudin 6                                                                       |
| 1,154 | ENSG00000181885  | CLDN7         | claudin 7                                                                       |
| 2,465 | ENSG00000213937  | CLDN9         | claudin 9                                                                       |
| 1,007 | ENSG00000038532  | CLEC16A       | C-type lectin domain containing 16A                                             |
| 1,945 | ENSG00000159212  | CLIC6         | chloride intracellular channel 6                                                |
| 1,047 | ENSG00000113282  | CLINT1        | clathrin interactor 1                                                           |
| 2,27  | ENSG00000013441  | CLK1          | CDC like kinase 1                                                               |
| 1,543 | ENSG00000153551  | CMTM7         | CKLF like MARVEL transmembrane domain containing 7                              |
| 2,203 | ENSG00000105427  | CNFN          | cornifelin                                                                      |
| 1,624 | ENSG00000142675  | CNKSRI        | connector enhancer of kinase suppressor of Ras 1                                |
| 1,593 | ENSG00000158158  | CNNM4         | cyclin and CBS domain divalent metal cation transport mediator 4                |
| 1,058 | ENSG00000080802  | CNOT4         | CCR4-NOT transcription complex subunit 4                                        |
| 1,246 | ENSG00000170037  | CNTROB        | centrobin, centriole duplication and spindle assembly protein                   |
| 1,339 | ENSG00000106078  | COBL          | cordo-bleu WH2 repeat protein                                                   |
| 1,819 | ENSG00000196739  | COL27A1       | collagen type XXVII alpha 1 chain                                               |
| 1,473 | ENSG00000134871  | COL4A2        | collagen type IV alpha 2 chain                                                  |
| 2,175 | ENSG00000049089  | COL9A2        | collagen type IX alpha 2 chain                                                  |
| 1,53  | ENSG00000214290  | COLCA2        | colorectal cancer associated 2                                                  |
| 1,108 | ENSG00000135678  | CPM           | carboxypeptidase M                                                              |
| 2,099 | ENSG00000205560  | CPT1B         | carnitine palmitoyltransferase 1B                                               |
| 1,817 | ENSG00000177685  | CRACR2B       | calcium release activated channel regulator 2B                                  |
| 3,085 | ENSG00000146592  | CREB5         | cAMP responsive element binding protein 5                                       |
| 1,16  | ENSG00000005339  | CREBBP        | CREB binding protein                                                            |
| 1,095 | ENSG00000058453  | CROCC         | ciliary rootlet coiled-coil, rootletin                                          |
| 1,367 | ENSG00000095713  | CRTAC1        | cartilage acidic protein 1                                                      |
| 1,397 | ENSG00000008405  | CRY1          | cryptochrome circadian clock 1                                                  |
| 1,46  | ENSG00000184371  | CSF1          | colony stimulating factor 1                                                     |
| 2,293 | ENSG00000108342  | CSF3          | colony stimulating factor 3                                                     |
| 1,277 | ENSG00000104218  | CSPP1         | centrosome and spindle pole associated protein 1                                |
| 3,026 | ENSG00000144655  | CSRNP1        | cysteine and serine rich nuclear protein 1                                      |
| 1,647 | ENSG00000170373  | CST1          | cystatin SN                                                                     |
| 2,02  | ENSG00000118523  | CTGF          | connective tissue growth factor                                                 |
| 1,01  | ENSG00000044115  | CTNNA1        | catenin alpha 1                                                                 |
| 1,318 | ENSG00000198561  | CTNND1        | catenin delta 1                                                                 |
| 2,439 | ENSG00000169862  | CTNND2        | catenin delta 2                                                                 |
| 1,375 | ENSG00000077063  | CTTNBP2       | cortactin binding protein 2                                                     |
| 1,024 | ENSG00000178531  | CTXN1         | cortixin 1                                                                      |
| 1,692 | ENSG00000180891  | CUEDC1        | CUE domain containing 1                                                         |
| 1,4   | ENSG00000044090  | CUL7          | cullin 7                                                                        |
| 2,101 | ENSG00000006210  | CX3CL1        | C-X3-C motif chemokine ligand 1                                                 |
| 4,043 | ENSG00000163739  | CXCL1         | C-X-C motif chemokine ligand 1                                                  |
| 3,846 | ENSG00000081041  | CXCL2         | C-X-C motif chemokine ligand 2                                                  |
| 4,81  | ENSG00000163734  | CXCL3         | C-X-C motif chemokine ligand 3                                                  |
| 2,604 | ENSG00000163735  | CXCL5         | C-X-C motif chemokine ligand 5                                                  |
| 2,487 | ENSG00000124875  | CXCL6         | C-X-C motif chemokine ligand 6                                                  |
| 3,5   | ENSG00000169429  | CXCL8         | C-X-C motif chemokine ligand 8                                                  |
| 1,073 | ENSG00000008283  | CYB561        | cytochrome b561                                                                 |
| 1,245 | ENSG00000235700  | CYCSP52       | cytochrome c, somatic pseudogene 52                                             |
| 3,026 | ENSG00000142871  | CYR61         | cysteine rich angiogenic inducer 61                                             |
| 1,342 | ENSG00000205795  | CYS1          | cystin 1                                                                        |
| 1,521 | ENSG00000105443  | CYTH2         | cytohesin 2                                                                     |
| 1,24  | ENSG00000222041  | CYTOR         | cytoskeleton regulator RNA                                                      |
| 1,14  | ENSG00000134780  | DAGLA         | diacylglycerol lipase alpha                                                     |
| 1,404 | ENSG00000178149  | DALRD3        | DALR anticodon binding domain containing 3                                      |
| 1,385 | ENSG00000196730  | DAPK1         | death associated protein kinase 1                                               |
| 1,802 | ENSG00000167657  | DAPK3         | death associated protein kinase 3                                               |
| 1,753 | ENSG00000113758  | DBN1          | drebrin 1                                                                       |

|       |                 |               |                                                                 |
|-------|-----------------|---------------|-----------------------------------------------------------------|
| 1,086 | ENSG0000003249  | DBNDD1        | dysbindin domain containing 1                                   |
| 2,168 | ENSG00000146038 | DCDC2         | doublecortin domain containing 2                                |
| 1,011 | ENSG00000215301 | DDX3X         | DEAD-box helicase 3, X-linked                                   |
| 1,122 | ENSG00000185163 | DDX51         | DEAD-box helicase 51                                            |
| 2,309 | ENSG00000160570 | DEDD2         | death effector domain containing 2                              |
| 2,015 | ENSG00000203970 | DEFB110       | defensin beta 110                                               |
| 1,324 | ENSG00000168350 | DEGS2         | delta 4-desaturase, sphingolipid 2                              |
| 1,098 | ENSG00000035499 | DEPDC1B       | DEP domain containing 1B                                        |
| 1,059 | ENSG00000109606 | DHX15         | DEAH-box helicase 15                                            |
| 1,153 | ENSG00000134815 | DHX34         | DExH-box helicase 34                                            |
| 1,275 | ENSG00000135829 | DHX9          | DExH-box helicase 9                                             |
| 1,02  | ENSG00000101191 | DIDO1         | death inducer-obliterator 1                                     |
| 1,487 | ENSG00000165023 | DIRAS2        | DIRAS family GTPase 2                                           |
| 1,059 | ENSG00000144535 | DIS3L2        | DIS3 like 3'-5' exoribonuclease 2                               |
| 1,072 | ENSG00000151208 | DLG5          | discs large MAGUK scaffold protein 5                            |
| 1,024 | ENSG00000170579 | DLGAP1        | DLG associated protein 1                                        |
| 1,112 | ENSG00000100206 | DMC1          | DNA meiotic recombinase 1                                       |
| 1,269 | ENSG00000161249 | DMKN          | dermokine                                                       |
| 1,045 | ENSG00000185800 | DMWD          | dystrophia myotonica, WD repeat containing                      |
| 1,503 | ENSG00000256061 | DNAAF4        | dynein axonemal assembly factor 4                               |
| 2,467 | ENSG00000086061 | DNAJA1        | DnaJ heat shock protein family (Hsp40) member A1                |
| 3,069 | ENSG00000140403 | DNAJA4        | DnaJ heat shock protein family (Hsp40) member A4                |
| 5,728 | ENSG00000132002 | DNAJB1        | DnaJ heat shock protein family (Hsp40) member B1                |
| 4,088 | ENSG00000162616 | DNAJB4        | DnaJ heat shock protein family (Hsp40) member B4                |
| 1,807 | ENSG00000244115 | DNAJC25-GNG10 | DNAJC25-GNG10 readthrough                                       |
| 1,032 | ENSG00000106976 | DNM1          | dynamin 1                                                       |
| 1,133 | ENSG00000107554 | DNMBP         | dynamin binding protein                                         |
| 1,241 | ENSG00000147459 | DOCK5         | dedicator of cytokinesis 5                                      |
| 1,011 | ENSG00000129932 | DOHH          | deoxyhypusine hydroxylase                                       |
| 1,187 | ENSG00000175920 | DOK7          | docking protein 7                                               |
| 1,675 | ENSG00000104885 | DOT1L         | DOT1 like histone lysine methyltransferase                      |
| 1,061 | ENSG00000166171 | DPCD          | deleted in primary ciliary dyskinesia homolog (mouse)           |
| 1,173 | ENSG00000171962 | DRC3          | dynein regulatory complex subunit 3                             |
| 1,658 | ENSG00000134755 | DSC2          | desmocollin 2                                                   |
| 1,084 | ENSG00000134762 | DSC3          | desmocollin 3                                                   |
| 1,786 | ENSG00000046604 | DSG2          | desmoglein 2                                                    |
| 1,873 | ENSG00000096696 | DSP           | desmoplakin                                                     |
| 1,209 | ENSG00000091073 | DTX2          | deltex E3 ubiquitin ligase 2                                    |
| 1,286 | ENSG00000178498 | DTX3          | deltex E3 ubiquitin ligase 3                                    |
| 1,288 | ENSG00000140279 | DUOX2         | dual oxidase 2                                                  |
| 1,813 | ENSG00000140274 | DUOXA2        | dual oxidase maturation factor 2                                |
| 2,567 | ENSG00000120129 | DUSP1         | dual specificity phosphatase 1                                  |
| 1,721 | ENSG00000143507 | DUSP10        | dual specificity phosphatase 10                                 |
| 1,058 | ENSG00000111266 | DUSP16        | dual specificity phosphatase 16                                 |
| 1,175 | ENSG00000167065 | DUSP18        | dual specificity phosphatase 18                                 |
| 2,849 | ENSG00000158050 | DUSP2         | dual specificity phosphatase 2                                  |
| 2,449 | ENSG00000120875 | DUSP4         | dual specificity phosphatase 4                                  |
| 2,574 | ENSG00000138166 | DUSP5         | dual specificity phosphatase 5                                  |
| 2,878 | ENSG00000184545 | DUSP8         | dual specificity phosphatase 8                                  |
| 1,185 | ENSG00000197102 | DYNC1H1       | dynein cytoplasmic 1 heavy chain 1                              |
| 1,381 | ENSG00000134874 | DZIP1         | DAZ interacting zinc finger protein 1                           |
| 1,881 | ENSG00000158163 | DZIP1L        | DAZ interacting zinc finger protein 1 like                      |
| 1,056 | ENSG00000088881 | EBF4          | early B-cell factor 4                                           |
| 1,388 | ENSG00000038358 | EDC4          | enhancer of mRNA decapping 4                                    |
| 4,159 | ENSG00000078401 | EDN1          | endothelin 1                                                    |
| 2,536 | ENSG00000127129 | EDN2          | endothelin 2                                                    |
| 1,253 | ENSG00000101210 | EEF1A2        | eukaryotic translation elongation factor 1 alpha 2              |
| 1,549 | ENSG00000122547 | EEDP1         | endonuclease/exonuclease/phosphatase family domain containing 1 |
| 1,129 | ENSG00000096093 | EFHC1         | EF-hand domain containing 1                                     |
| 1,112 | ENSG00000090776 | EFNB1         | ephrin B1                                                       |
| 1,2   | ENSG00000146648 | EGFR          | epidermal growth factor receptor                                |
| 3,348 | ENSG00000235947 | EGOT          | eosinophil granule ontogeny transcript (non-protein coding)     |
| 3,87  | ENSG00000120738 | EGR1          | early growth response 1                                         |
| 2,148 | ENSG00000179388 | EGR3          | early growth response 3                                         |
| 1,344 | ENSG00000135625 | EGR4          | early growth response 4                                         |
| 1,755 | ENSG00000110047 | EHD1          | EH domain containing 1                                          |
| 1,2   | ENSG00000103966 | EHD4          | EH domain containing 4                                          |
| 2,526 | ENSG00000135373 | EHF           | ETS homologous factor                                           |
| 1,015 | ENSG00000172071 | EIF2AK3       | eukaryotic translation initiation factor 2 alpha kinase 3       |
| 1,001 | ENSG00000141543 | EIF4A3        | eukaryotic translation initiation factor 4A3                    |
| 2,156 | ENSG00000163435 | ELF3          | E74 like ETS transcription factor 3                             |
| 1,165 | ENSG00000102890 | ELMO3         | engulfment and cell motility 3                                  |
| 1,637 | ENSG00000164181 | ELOVL7        | ELOVL fatty acid elongase 7                                     |
| 1,303 | ENSG00000134531 | EMP1          | epithelial membrane protein 1                                   |
| 1,41  | ENSG00000154380 | ENAH          | enabled homolog (Drosophila)                                    |
| 1,493 | ENSG00000171617 | ENC1          | ectodermal-neural cortex 1                                      |
| 1,044 | ENSG00000167280 | ENGASE        | endo-beta-N-acetylglucosaminidase                               |
| 1,293 | ENSG00000100393 | EP300         | E1A binding protein p300                                        |
| 1,059 | ENSG00000088367 | EPB41L1       | erythrocyte membrane protein band 4.1 like 1                    |
| 2,514 | ENSG00000119888 | EPCAM         | epithelial cell adhesion molecule                               |
| 1,077 | ENSG00000183317 | EPHA10        | EPH receptor A10                                                |

|       |                 |          |                                                        |
|-------|-----------------|----------|--------------------------------------------------------|
| 2,966 | ENSG00000142627 | EPHA2    | EPH receptor A2                                        |
| 1,11  | ENSG00000177106 | EPS8L2   | EPS8 like 2                                            |
| 1,681 | ENSG00000198758 | EPS8L3   | EPS8 like 3                                            |
| 3,051 | ENSG00000124882 | EREG     | epiregulin                                             |
| 1,277 | ENSG00000177459 | ERICH5   | glutamate rich 5                                       |
| 1,054 | ENSG00000134398 | ERN2     | endoplasmic reticulum to nucleus signaling 2           |
| 1,615 | ENSG00000116285 | ERRF1    | ERBB receptor feedback inhibitor 1                     |
| 1,622 | ENSG00000213462 | ERV3-1   | endogenous retrovirus group 3 member 1, envelope       |
| 1,887 | ENSG00000104413 | ESRP1    | epithelial splicing regulatory protein 1               |
| 1,06  | ENSG00000196482 | ESRRG    | estrogen related receptor gamma                        |
| 1,799 | ENSG00000117036 | ETV3     | ETS variant 3                                          |
| 2,315 | ENSG00000175832 | ETV4     | ETS variant 4                                          |
| 1,483 | ENSG00000072840 | EVC      | EvC ciliary complex subunit 1                          |
| 1,374 | ENSG00000173040 | EVC2     | EvC ciliary complex subunit 2                          |
| 1,167 | ENSG00000187609 | EXD3     | exonuclease 3'-5' domain containing 3                  |
| 1,098 | ENSG00000144036 | EXOC6B   | exocyst complex component 6B                           |
| 2,38  | ENSG00000092820 | EZR      | ezrin                                                  |
| 1,697 | ENSG00000164251 | F2RL1    | F2R like trypsin receptor 1                            |
| 1,555 | ENSG00000117525 | F3       | coagulation factor III, tissue factor                  |
| 2,271 | ENSG00000103089 | FA2H     | fatty acid 2-hydroxylase                               |
| 1,12  | ENSG00000219668 | FADS3    | fatty acid desaturase 3                                |
| 1,902 | ENSG00000167106 | FAM102A  | family with sequence similarity 102 member A           |
| 1,159 | ENSG00000184731 | FAM110C  | family with sequence similarity 110 member C           |
| 1,204 | ENSG00000138439 | FAM117B  | family with sequence similarity 117 member B           |
| 1,579 | ENSG00000164142 | FAM160A1 | family with sequence similarity 160 member A1          |
| 1,251 | ENSG00000188163 | FAM166A  | family with sequence similarity 166 member A           |
| 1,569 | ENSG00000148468 | FAM171A1 | family with sequence similarity 171 member A1          |
| 1,949 | ENSG00000146067 | FAM193B  | family with sequence similarity 193 member B           |
| 1,076 | ENSG00000204860 | FAM201A  | family with sequence similarity 201 member A           |
| 1,106 | ENSG00000183844 | FAM3B    | family with sequence similarity 3 member B             |
| 1     | ENSG00000198643 | FAM3D    | family with sequence similarity 3 member D             |
| 2,927 | ENSG00000112773 | FAM46A   | family with sequence similarity 46 member A            |
| 2,298 | ENSG00000158246 | FAM46B   | family with sequence similarity 46 member B            |
| 1,244 | ENSG00000183508 | FAM46C   | family with sequence similarity 46 member C            |
| 2,124 | ENSG00000120709 | FAM53C   | family with sequence similarity 53 member C            |
| 1,301 | ENSG00000139146 | FAM60A   | family with sequence similarity 60 member A            |
| 1,418 | ENSG00000168143 | FAM83B   | family with sequence similarity 83 member B            |
| 1,873 | ENSG00000105523 | FAM83E   | family with sequence similarity 83 member E            |
| 2,746 | ENSG00000188522 | FAM83G   | family with sequence similarity 83 member G            |
| 1,333 | ENSG00000152767 | FARP1    | FERM, ARH/RhoGEF and pleckstrin domain protein 1       |
| 1,149 | ENSG00000162458 | FBLIM1   | filamin binding LIM protein 1                          |
| 1,146 | ENSG00000156860 | FBRS     | fibrosin                                               |
| 2,239 | ENSG00000171823 | FBXL14   | F-box and leucine rich repeat protein 14               |
| 1,054 | ENSG00000130475 | FCHO1    | FCH domain only 1                                      |
| 1,062 | ENSG00000197948 | FCHSD1   | FCH and double SH3 domains 1                           |
| 1,602 | ENSG00000145780 | FEM1C    | fem-1 homolog C                                        |
| 1,281 | ENSG00000180263 | FGD6     | FYVE, RhoGEF and PH domain containing 6                |
| 1,386 | ENSG00000162344 | FGF19    | fibroblast growth factor 19                            |
| 1,029 | ENSG00000138675 | FGF5     | fibroblast growth factor 5                             |
| 1,406 | ENSG00000066468 | FGFR2    | fibroblast growth factor receptor 2                    |
| 2,122 | ENSG00000068078 | FGFR3    | fibroblast growth factor receptor 3                    |
| 1,001 | ENSG00000160867 | FGFR4    | fibroblast growth factor receptor 4                    |
| 2,356 | ENSG00000168386 | FILIP1L  | filamin A interacting protein 1 like                   |
| 1,963 | ENSG00000004478 | FKBP4    | FK506 binding protein 4                                |
| 1,845 | ENSG00000136068 | FLNB     | filamin B                                              |
| 1,262 | ENSG00000185070 | FLRT2    | fibronectin leucine rich transmembrane protein 2       |
| 2,014 | ENSG00000125848 | FLRT3    | fibronectin leucine rich transmembrane protein 3       |
| 1,63  | ENSG00000137942 | FNBP1L   | formin binding protein 1 like                          |
| 1,392 | ENSG00000109920 | FNBP4    | formin binding protein 4                               |
| 1,507 | ENSG00000110195 | FOLR1    | folate receptor 1                                      |
| 4,008 | ENSG00000170345 | FOS      | Fos proto-oncogene, AP-1 transcription factor subunit  |
| 6,003 | ENSG00000125740 | FOSB     | FosB proto-oncogene, AP-1 transcription factor subunit |
| 4,17  | ENSG00000175592 | FOSL1    | FOS like 1, AP-1 transcription factor subunit          |
| 1,985 | ENSG00000075426 | FOSL2    | FOS like 2, AP-1 transcription factor subunit          |
| 1,404 | ENSG00000129514 | FOXA1    | forkhead box A1                                        |
| 1,374 | ENSG00000125798 | FOXA2    | forkhead box A2                                        |
| 1,98  | ENSG00000129654 | FOXJ1    | forkhead box J1                                        |
| 1,345 | ENSG00000150907 | FOXO1    | forkhead box O1                                        |
| 1,122 | ENSG00000118689 | FOXO3    | forkhead box O3                                        |
| 1,172 | ENSG00000114861 | FOXP1    | forkhead box P1                                        |
| 1,265 | ENSG00000128573 | FOXP2    | forkhead box P2                                        |
| 2,905 | ENSG00000164379 | FOXQ1    | forkhead box Q1                                        |
| 1,389 | ENSG00000138759 | FRAS1    | Fraser extracellular matrix complex subunit 1          |
| 1,247 | ENSG00000181274 | FRAT2    | FRAT2, WNT signaling pathway regulator                 |
| 1,354 | ENSG00000114541 | FRMD4B   | FERM domain containing 4B                              |
| 1,252 | ENSG00000106701 | FSD1L    | fibronectin type III and SPRY domain containing 1 like |
| 2,087 | ENSG00000070404 | FSTL3    | folistatin like 3                                      |
| 1,155 | ENSG00000089280 | FUS      | FUS RNA binding protein                                |
| 1,21  | ENSG00000171124 | FUT3     | fucosyltransferase 3 (Lewis blood group)               |
| 1,745 | ENSG00000196371 | FUT4     | fucosyltransferase 4                                   |
| 1,816 | ENSG00000137731 | FXYD2    | FXYD domain containing ion transport regulator 2       |

|       |                 |                 |                                                                  |
|-------|-----------------|-----------------|------------------------------------------------------------------|
| 1,284 | ENSG00000089356 | FXYD3           | FXYD domain containing ion transport regulator 3                 |
| 1,386 | ENSG00000157240 | FZD1            | frizzled class receptor 1                                        |
| 1,499 | ENSG00000102287 | GABRE           | gamma-aminobutyric acid type A receptor epsilon subunit          |
| 2,093 | ENSG00000094755 | GABRP           | gamma-aminobutyric acid type A receptor pi subunit               |
| 1,487 | ENSG00000116717 | GADD45A         | growth arrest and DNA damage inducible alpha                     |
| 1,485 | ENSG00000099860 | GADD45B         | growth arrest and DNA damage inducible beta                      |
| 1,319 | ENSG00000128242 | GAL3ST1         | galactose-3-O-sulfotransferase 1                                 |
| 1,678 | ENSG00000119514 | GALNT12         | polypeptide N-acetylgalactosaminyltransferase 12                 |
| 2,333 | ENSG00000115339 | GALNT3          | polypeptide N-acetylgalactosaminyltransferase 3                  |
| 1,486 | ENSG00000257594 | GALNT4          | polypeptide N-acetylgalactosaminyltransferase 4                  |
| 1,237 | ENSG00000141448 | GATA6           | GATA binding protein 6                                           |
| 1,029 | ENSG00000070610 | GBA2            | glucosylceramidase beta 2                                        |
| 1,055 | ENSG00000107862 | GBF1            | golgi brefeldin A resistant guanine nucleotide exchange factor 1 |
| 1,096 | ENSG00000117228 | GBP1            | guanylate binding protein 1                                      |
| 1,948 | ENSG00000140297 | GCNT3           | glucosaminyl (N-acetyl) transferase 3, mucin type                |
| 2,12  | ENSG00000130513 | GDF15           | growth differentiation factor 15                                 |
| 2,527 | ENSG00000167741 | GGT6            | gamma-glutamyltransferase 6                                      |
| 1,195 | ENSG00000106128 | GHRHR           | growth hormone releasing hormone receptor                        |
| 1,085 | ENSG00000146830 | GIGYF1          | GRB10 interacting GYF protein 1                                  |
| 1,62  | ENSG00000188910 | GJB3            | gap junction protein beta 3                                      |
| 1,212 | ENSG00000126603 | GLIS2           | GLIS family zinc finger 2                                        |
| 1,989 | ENSG00000107249 | GLIS3           | GLIS family zinc finger 3                                        |
| 1,062 | ENSG00000237009 | GLIS3-AS1       | GLIS3 antisense RNA 1                                            |
| 1,229 | ENSG00000109738 | GLRB            | glycine receptor beta                                            |
| 1,203 | ENSG00000120063 | GNA13           | G protein subunit alpha 13                                       |
| 1,978 | ENSG00000215252 | GOLGA8A/GOLGA8B | golgin A8 family member A                                        |
| 1,239 | ENSG00000116580 | GON4L           | gon-4 like                                                       |
| 1,037 | ENSG00000186566 | GPATCH8         | G-patch domain containing 8                                      |
| 1,061 | ENSG00000062194 | GPBP1           | GC-rich promoter binding protein 1                               |
| 1,78  | ENSG00000166073 | GPR176          | G protein-coupled receptor 176                                   |
| 1,265 | ENSG00000169508 | GPR183          | G protein-coupled receptor 183                                   |
| 2,926 | ENSG00000135888 | GPRC5A          | G protein-coupled receptor class C group 5 member A              |
| 2,376 | ENSG00000167191 | GPRC5B          | G protein-coupled receptor class C group 5 member B              |
| 1,752 | ENSG00000023171 | GRAMD1B         | GRAM domain containing 1B                                        |
| 2,575 | ENSG00000141738 | GRB7            | growth factor receptor bound protein 7                           |
| 1,062 | ENSG00000196208 | GREB1           | growth regulation by estrogen in breast cancer 1                 |
| 1,968 | ENSG00000083307 | GRHL2           | grainyhead like transcription factor 2                           |
| 1,03  | ENSG00000084207 | GSTP1           | glutathione S-transferase pi 1                                   |
| 1,767 | ENSG00000100226 | GTPBP1          | GTP binding protein 1                                            |
| 1,673 | ENSG00000197273 | GUCA2A          | guanylate cyclase activator 2A                                   |
| 1,105 | ENSG00000144366 | GULP1           | GULP, engulfment adaptor PTB domain containing 1                 |
| 1,954 | ENSG00000228315 | GUSBP11         | glucuronidase, beta pseudogene 11                                |
| 1,068 | ENSG00000241549 | GUSBP2          | glucuronidase, beta pseudogene 2                                 |
| 1,89  | ENSG00000253203 | GUSBP3          | glucuronidase, beta pseudogene 3                                 |
| 1,204 | ENSG00000184897 | H1FX            | H1 histone family member X                                       |
| 1,367 | ENSG00000188486 | H2AFX           | H2A histone family member X                                      |
| 1,117 | ENSG00000132475 | H3F3A/H3F3B     | H3 histone family member 3A                                      |
| 1,158 | ENSG00000188375 | H3F3C           | H3 histone family member 3C                                      |
| 1,298 | ENSG00000103044 | HAS3            | hyaluronan synthase 3                                            |
| 3,814 | ENSG00000113070 | HBEGF           | heparin binding EGF like growth factor                           |
| 1,084 | ENSG00000048052 | HDAC9           | histone deacetylase 9                                            |
| 1,094 | ENSG00000167674 | HDGFL2          | HDGF like 2                                                      |
| 2,702 | ENSG00000230267 | HERC2P4         | hect domain and RLD 2 pseudogene 4                               |
| 1,005 | ENSG00000114315 | HES1            | hes family bHLH transcription factor 1                           |
| 1,902 | ENSG00000188290 | HES4            | hes family bHLH transcription factor 4                           |
| 1,454 | ENSG00000186834 | HEXIM1          | hexamethylene bisacetamide inducible 1                           |
| 1,139 | ENSG00000100644 | HIF1A           | hypoxia inducible factor 1 alpha subunit                         |
| 1,902 | ENSG00000130787 | HIP1R           | huntingtin interacting protein 1 related                         |
| 2,193 | ENSG00000196866 | HIST1H2AD       | histone cluster 1 H2A family member d                            |
| 1,409 | ENSG00000124635 | HIST1H2BJ       | histone cluster 1 H2B family member j                            |
| 2,318 | ENSG00000233822 | HIST1H2BN       | histone cluster 1 H2B family member n                            |
| 1,994 | ENSG00000197409 | HIST1H3D        | histone cluster 1 H3 family member d                             |
| 1,251 | ENSG00000197153 | HIST1H3J        | histone cluster 1 H3 family member j                             |
| 1,603 | ENSG00000196890 | HIST3H2BB       | histone cluster 3 H2B family member b                            |
| 1,456 | ENSG00000197837 | HIST4H4         | histone cluster 4 H4                                             |
| 1,026 | ENSG00000095951 | HIVEP1          | human immunodeficiency virus type I enhancer binding protein 1   |
| 1,831 | ENSG00000010818 | HIVEP2          | human immunodeficiency virus type I enhancer binding protein 2   |
| 1,701 | ENSG00000156510 | HKDC1           | hexokinase domain containing 1                                   |
| 2,612 | ENSG00000137309 | HMG A1          | high mobility group AT-hook 1                                    |
| 1,443 | ENSG00000113161 | HMGCR           | 3-hydroxy-3-methylglutaryl-CoA reductase                         |
| 1,823 | ENSG00000112972 | HMGCS1          | 3-hydroxy-3-methylglutaryl-CoA synthase 1                        |
| 1,063 | ENSG00000113716 | HMGXB3          | HMG-box containing 3                                             |
| 1,195 | ENSG00000177733 | HNRNPA0         | heterogeneous nuclear ribonucleoprotein A0                       |
| 1,352 | ENSG00000169045 | HNRNPH1         | heterogeneous nuclear ribonucleoprotein H1                       |
| 1,039 | ENSG00000096746 | HNRNPH3         | heterogeneous nuclear ribonucleoprotein H3                       |
| 1,595 | ENSG00000153187 | HNRNPU          | heterogeneous nuclear ribonucleoprotein U                        |
| 1,125 | ENSG00000103942 | HOMER2          | homer scaffolding protein 2                                      |
| 7,313 | ENSG00000257017 | HP              | haptoglobin                                                      |
| 1,146 | ENSG00000127252 | HRASL5          | HRAS like suppressor                                             |
| 1,477 | ENSG00000002587 | HS3ST1          | heparan sulfate-glucosamine 3-sulfotransferase 1                 |
| 1,022 | ENSG00000099251 | HSD17B7P2       | hydroxysteroid 17-beta dehydrogenase 7 pseudogene 2              |

|       |                 |           |                                                                    |
|-------|-----------------|-----------|--------------------------------------------------------------------|
| 1,627 | ENSG00000102878 | HSF4      | heat shock transcription factor 4                                  |
| 2,99  | ENSG00000080824 | HSP90AA1  | heat shock protein 90 alpha family class A member 1                |
| 2,668 | ENSG00000096384 | HSP90AB1  | heat shock protein 90 alpha family class B member 1                |
| 2,059 | ENSG00000205940 | HSP90AB2P | heat shock protein 90 alpha family class B member 2, pseudogene    |
| 1,081 | ENSG00000170606 | HSPA4     | heat shock protein family A (Hsp70) member 4                       |
| 1,319 | ENSG00000164070 | HSPA4L    | heat shock protein family A (Hsp70) member 4 like                  |
| 1,29  | ENSG00000044574 | HSPA5     | heat shock protein family A (Hsp70) member 5                       |
| 6,995 | ENSG00000173110 | HSPA6     | heat shock protein family A (Hsp70) member 6                       |
| 6,679 | ENSG00000225217 | HSPA7     | heat shock protein family A (Hsp70) member 7                       |
| 2,462 | ENSG00000109971 | HSPA8     | heat shock protein family A (Hsp70) member 8                       |
| 1,387 | ENSG00000144381 | HSPD1     | heat shock protein family D (Hsp60) member 1                       |
| 5,132 | ENSG00000120694 | HSPH1     | heat shock protein family H (Hsp110) member 1                      |
| 2,069 | ENSG00000142149 | HUNK      | hormonally up-regulated Neu-associated kinase                      |
| 1,038 | ENSG00000157423 | HYDIN     | HYDIN, axonemal central pair apparatus protein                     |
| 1,283 | ENSG00000163596 | ICA1L     | islet cell autoantigen 1 like                                      |
| 2,229 | ENSG00000090339 | ICAM1     | intercellular adhesion molecule 1                                  |
| 1,02  | ENSG00000105371 | ICAM4     | intercellular adhesion molecule 4 (Landsteiner-Wiener blood group) |
| 1,034 | ENSG00000172201 | ID4       | inhibitor of DNA binding 4, HLH protein                            |
| 2,429 | ENSG00000232656 | IDI2-AS1  | IDI2 antisense RNA 1                                               |
| 1,349 | ENSG00000127415 | IDUA      | iduronidase, alpha-L-                                              |
| 2,343 | ENSG00000160888 | IER2      | immediate early response 2                                         |
| 3,488 | ENSG00000162783 | IER5      | immediate early response 5                                         |
| 1,004 | ENSG00000188483 | IER5L     | immediate early response 5 like                                    |
| 1,91  | ENSG00000169991 | IFFO2     | intermediate filament family orphan 2                              |
| 1,823 | ENSG00000006652 | IFRD1     | interferon related developmental regulator 1                       |
| 1,545 | ENSG00000187535 | IFT140    | intraflagellar transport 140                                       |
| 1,056 | ENSG00000138002 | IFT172    | intraflagellar transport 172                                       |
| 1,22  | ENSG00000122970 | IFT81     | intraflagellar transport 81                                        |
| 1,495 | ENSG00000073792 | IGF2BP2   | insulin like growth factor 2 mRNA binding protein 2                |
| 1,709 | ENSG00000143061 | IGSF3     | immunoglobulin superfamily member 3                                |
| 1,416 | ENSG00000150782 | IL18      | interleukin 18                                                     |
| 2,389 | ENSG00000125538 | IL1B      | interleukin 1 beta                                                 |
| 3,182 | ENSG00000110944 | IL23A     | interleukin 23 subunit alpha                                       |
| 1,057 | ENSG00000077238 | IL4R      | interleukin 4 receptor                                             |
| 2,2   | ENSG00000136244 | IL6       | interleukin 6                                                      |
| 1,345 | ENSG00000145103 | ILDRI1    | immunoglobulin like domain containing receptor 1                   |
| 1,73  | ENSG00000129351 | ILF3      | interleukin enhancer binding factor 3                              |
| 1,323 | ENSG00000203485 | INF2      | inverted formin, FH2 and WH2 domain containing                     |
| 2,122 | ENSG00000122641 | INHBA     | inhibin beta A subunit                                             |
| 1,32  | ENSG00000148384 | INPP5E    | inositol polyphosphate-5-phosphatase E                             |
| 1,312 | ENSG00000164066 | INTU      | inturned planar cell polarity protein                              |
| 1,017 | ENSG00000161896 | IP6K3     | inositol hexakisphosphate kinase 3                                 |
| 2,335 | ENSG00000132321 | IQCA1     | IQ motif containing with AAA domain 1                              |
| 1,416 | ENSG00000174628 | IQCK      | IQ motif containing K                                              |
| 1,083 | ENSG00000164675 | IQUB      | IQ motif and ubiquitin domain containing                           |
| 1,926 | ENSG00000134070 | IRAK2     | interleukin 1 receptor associated kinase 2                         |
| 1,855 | ENSG00000125347 | IRF1      | interferon regulatory factor 1                                     |
| 1,064 | ENSG00000168264 | IRF2BP2   | interferon regulatory factor 2 binding protein 2                   |
| 1,628 | ENSG00000117595 | IRF6      | interferon regulatory factor 6                                     |
| 1,124 | ENSG00000167378 | IRGQ      | immunity related GTPase Q                                          |
| 2,15  | ENSG00000185950 | IRS2      | insulin receptor substrate 2                                       |
| 1,812 | ENSG00000105655 | ISYNA1    | inositol-3-phosphate synthase 1                                    |
| 1,497 | ENSG00000164171 | ITGA2     | integrin subunit alpha 2                                           |
| 2,222 | ENSG00000005884 | ITGA3     | integrin subunit alpha 3                                           |
| 1,317 | ENSG00000161638 | ITGA5     | integrin subunit alpha 5                                           |
| 1,024 | ENSG00000091409 | ITGA6     | integrin subunit alpha 6                                           |
| 1,949 | ENSG00000132470 | ITGB4     | integrin subunit beta 4                                            |
| 1,493 | ENSG00000115221 | ITGB6     | integrin subunit beta 6                                            |
| 2,461 | ENSG00000105855 | ITGB8     | integrin subunit beta 8                                            |
| 1,874 | ENSG00000123243 | ITIH5     | inter-alpha-trypsin inhibitor heavy chain family member 5          |
| 2,98  | ENSG00000086544 | ITPKC     | inositol-trisphosphate 3-kinase C                                  |
| 1,333 | ENSG00000096433 | ITPR3     | inositol 1,4,5-trisphosphate receptor type 3                       |
| 1,074 | ENSG00000171988 | JMJD1C    | jumonji domain containing 1C                                       |
| 1,973 | ENSG00000070495 | JMJD6     | arginine demethylase and lysine hydroxylase                        |
| 3,82  | ENSG00000177606 | JUN       | Jun proto-oncogene, AP-1 transcription factor subunit              |
| 1,896 | ENSG00000171223 | JUNB      | JunB proto-oncogene, AP-1 transcription factor subunit             |
| 3,112 | ENSG00000130522 | JUND      | JunD proto-oncogene, AP-1 transcription factor subunit             |
| 2,83  | ENSG00000146049 | KAAG1     | kidney associated antigen 1                                        |
| 1,851 | ENSG00000162975 | KCNF1     | potassium voltage-gated channel modifier subfamily F member 1      |
| 1,212 | ENSG00000182132 | KCNIP1    | potassium voltage-gated channel interacting protein 1              |
| 1,057 | ENSG00000115474 | KCNJ13    | potassium voltage-gated channel subfamily J member 13              |
| 1,286 | ENSG00000157551 | KCNJ15    | potassium voltage-gated channel subfamily J member 15              |
| 1,521 | ENSG00000153822 | KCNJ16    | potassium voltage-gated channel subfamily J member 16              |
| 1,088 | ENSG00000082482 | KCNK2     | potassium two pore domain channel subfamily K member 2             |
| 1,802 | ENSG00000164626 | KCNK5     | potassium two pore domain channel subfamily K member 5             |
| 1,2   | ENSG00000213859 | KCTD11    | potassium channel tetramerization domain containing 11             |
| 1,112 | ENSG00000174943 | KCTD13    | potassium channel tetramerization domain containing 13             |
| 1,493 | ENSG00000173120 | KDM2A     | lysine demethylase 2A                                              |
| 1,005 | ENSG00000107077 | KDM4C     | lysine demethylase 4C                                              |
| 1,902 | ENSG00000117139 | KDM5B     | lysine demethylase 5B                                              |
| 1,031 | ENSG00000012817 | KDM5D     | lysine demethylase 5D                                              |



|       |                 |           |                                                        |
|-------|-----------------|-----------|--------------------------------------------------------|
| 1,519 | ENSG00000147050 | KDM6A     | lysine demethylase 6A                                  |
| 1,917 | ENSG00000132510 | KDM6B     | lysine demethylase 6B                                  |
| 1,133 | ENSG00000047578 | KIAA0556  | KIAA0556                                               |
| 1,054 | ENSG00000164542 | KIAA0895  | KIAA0895                                               |
| 1,696 | ENSG00000196123 | KIAA0895L | KIAA0895 like                                          |
| 1,034 | ENSG00000120549 | KIAA1217  | KIAA1217                                               |
| 1,984 | ENSG00000162522 | KIAA1522  | KIAA1522                                               |
| 2,766 | ENSG00000136883 | KIF12     | kinesin family member 12                               |
| 1,136 | ENSG00000197892 | KIF13B    | kinesin family member 13B                              |
| 1,032 | ENSG00000131437 | KIF3A     | kinesin family member 3A                               |
| 1,571 | ENSG00000167702 | KIFC2     | kinesin family member C2                               |
| 1,041 | ENSG00000151657 | KIN       | Kin17 DNA and RNA binding protein                      |
| 1,051 | ENSG00000174996 | KLC2      | kinesin light chain 2                                  |
| 1,584 | ENSG00000104892 | KLC3      | kinesin light chain 3                                  |
| 1,818 | ENSG00000155090 | KLF10     | Kruppel like factor 10                                 |
| 2,544 | ENSG00000127528 | KLF2      | Kruppel like factor 2                                  |
| 2,324 | ENSG00000136826 | KLF4      | Kruppel like factor 4                                  |
| 3,599 | ENSG00000102554 | KLF5      | Kruppel like factor 5                                  |
| 3,471 | ENSG00000067082 | KLF6      | Kruppel like factor 6                                  |
| 1,324 | ENSG00000118263 | KLF7      | Kruppel like factor 7                                  |
| 1,037 | ENSG00000174010 | KLHL15    | kelch like family member 15                            |
| 1,351 | ENSG00000187961 | KLHL17    | kelch like family member 17                            |
| 3,227 | ENSG00000162413 | KLHL21    | kelch like family member 21                            |
| 1,503 | ENSG00000119771 | KLHL29    | kelch like family member 29                            |
| 1,493 | ENSG00000129451 | KLK10     | kallikrein related peptidase 10                        |
| 1,814 | ENSG00000167757 | KLK11     | kallikrein related peptidase 11                        |
| 1,082 | ENSG00000005483 | KMT2E     | lysine methyltransferase 2E                            |
| 1,023 | ENSG00000171346 | KRT15     | keratin 15                                             |
| 4,214 | ENSG00000128422 | KRT17     | keratin 17                                             |
| 1,259 | ENSG00000111057 | KRT18     | keratin 18                                             |
| 2,836 | ENSG00000171345 | KRT19     | keratin 19                                             |
| 1,097 | ENSG00000185479 | KRT6B     | keratin 6B                                             |
| 2,644 | ENSG00000135480 | KRT7      | keratin 7                                              |
| 1,573 | ENSG00000170421 | KRT8      | keratin 8                                              |
| 2,57  | ENSG00000167767 | KRT80     | keratin 80                                             |
| 1,931 | ENSG00000205426 | KRT81     | keratin 81                                             |
| 1,802 | ENSG00000170442 | KRT86     | keratin 86                                             |
| 1,158 | ENSG00000187026 | KRTAP21-2 | keratin associated protein 21-2                        |
| 1,066 | ENSG00000157992 | KRTCAP3   | keratinocyte associated protein 3                      |
| 2,084 | ENSG00000159166 | LAD1      | ladinin 1                                              |
| 1,436 | ENSG00000101680 | LAMA1     | laminin subunit alpha 1                                |
| 1,326 | ENSG00000053747 | LAMA3     | laminin subunit alpha 3                                |
| 2,175 | ENSG00000130702 | LAMA5     | laminin subunit alpha 5                                |
| 1,504 | ENSG00000172037 | LAMB2     | laminin subunit beta 2                                 |
| 2,997 | ENSG00000196878 | LAMB3     | laminin subunit beta 3                                 |
| 2,117 | ENSG00000135862 | LAMC1     | laminin subunit gamma 1                                |
| 3,697 | ENSG00000058085 | LAMC2     | laminin subunit gamma 2                                |
| 1,573 | ENSG00000165905 | LARGE2    | LARGE xylosyl- and glucuronyltransferase 2             |
| 1,961 | ENSG00000166173 | LARP6     | La ribonucleoprotein domain family member 6            |
| 1,186 | ENSG00000131023 | LATS1     | large tumor suppressor kinase 1                        |
| 1,061 | ENSG00000204381 | LAYN      | layilin                                                |
| 1,433 | ENSG00000135338 | LCA5      | LCA5, lebercilin                                       |
| 1,622 | ENSG00000148346 | LCN2      | lipocalin 2                                            |
| 1,047 | ENSG00000243709 | LEFTY1    | left-right determination factor 1                      |
| 1,085 | ENSG00000174106 | LEMD3     | LEM domain containing 3                                |
| 1,154 | ENSG00000100079 | LGALS2    | galectin 2                                             |
| 1,342 | ENSG00000145685 | LHFPL2    | lipoma HMGIC fusion partner-like 2                     |
| 3,96  | ENSG00000128342 | LIF       | LIF, interleukin 6 family cytokine                     |
| 1,055 | ENSG00000182541 | LIMK2     | LIM domain kinase 2                                    |
| 1,8   | ENSG00000225880 | LINC00115 | long intergenic non-protein coding RNA 115             |
| 1,126 | ENSG00000231028 | LINC00271 | long intergenic non-protein coding RNA 271             |
| 1,14  | ENSG00000233237 | LINC00472 | long intergenic non-protein coding RNA 472             |
| 1,405 | ENSG00000258169 | LINC00485 | long intergenic non-protein coding RNA 485             |
| 1,428 | ENSG00000163898 | LIPH      | lipase H                                               |
| 1,797 | ENSG00000073350 | LLGL2     | LLGL2, scribble cell polarity complex component        |
| 1,173 | ENSG00000154359 | LONRF1    | LON peptidase N-terminal domain and ring finger 1      |
| 1,669 | ENSG00000064547 | LPAR2     | lysophosphatidic acid receptor 2                       |
| 1,837 | ENSG00000139263 | LRIG3     | leucine rich repeats and immunoglobulin like domains 3 |
| 1,369 | ENSG00000137269 | LRRC1     | leucine rich repeat containing 1                       |
| 1,426 | ENSG00000148814 | LRRC27    | leucine rich repeat containing 27                      |
| 1,22  | ENSG00000159708 | LRRC36    | leucine rich repeat containing 36                      |
| 1,403 | ENSG00000178026 | LRRC75B   | leucine rich repeat containing 75B                     |
| 1,438 | ENSG00000171017 | LRRC8E    | leucine rich repeat containing 8 family member E       |
| 2,434 | ENSG00000175928 | LRRN1     | leucine rich repeat neuronal 1                         |
| 1,692 | ENSG00000125872 | LRRN4     | leucine rich repeat neuronal 4                         |
| 1,296 | ENSG00000007392 | LUC7L     | LUC7 like                                              |
| 1,241 | ENSG00000153714 | LURAP1L   | leucine rich adaptor protein 1 like                    |
| 1,69  | ENSG00000150556 | LYPD6B    | LY6/PLAUR domain containing 6B                         |
| 1,414 | ENSG00000181541 | MAB21L2   | mab-21 like 2                                          |
| 1,089 | ENSG00000173212 | MAB21L3   | mab-21 like 3                                          |
| 2,691 | ENSG00000183742 | MACC1     | MACC1, MET transcriptional regulator                   |

|       |                 |                |                                                                             |
|-------|-----------------|----------------|-----------------------------------------------------------------------------|
| 3,138 | ENSG00000185022 | MAFF           | MAF bZIP transcription factor F                                             |
| 2,165 | ENSG00000197063 | MAFG           | MAF bZIP transcription factor G                                             |
| 1,098 | ENSG00000265688 | MAFG-AS1       | MAFG antisense RNA 1 (head to head)                                         |
| 1,949 | ENSG00000198517 | MAFK           | MAF bZIP transcription factor K                                             |
| 1,362 | ENSG00000187243 | MAGED4/MAGED4B | MAGE family member D4B                                                      |
| 1,559 | ENSG00000151276 | MAGI1          | membrane associated guanylate kinase, WW and PDZ domain containing 1        |
| 1,996 | ENSG00000251562 | MALAT1         | metastasis associated lung adenocarcinoma transcript 1 (non-protein coding) |
| 1,278 | ENSG00000184384 | MAML2          | mastermind like transcriptional coactivator 2                               |
| 1,327 | ENSG00000197769 | MAP1LC3C       | microtubule associated protein 1 light chain 3 gamma                        |
| 1,492 | ENSG00000130479 | MAP1S          | microtubule associated protein 1S                                           |
| 1,498 | ENSG00000078018 | MAP2           | microtubule associated protein 2                                            |
| 1,157 | ENSG00000034152 | MAP2K3         | mitogen-activated protein kinase kinase 3                                   |
| 1,524 | ENSG00000095015 | MAP3K1         | mitogen-activated protein kinase kinase kinase 1                            |
| 1,795 | ENSG0000006062  | MAP3K14        | mitogen-activated protein kinase kinase kinase 14                           |
| 2,519 | ENSG00000107968 | MAP3K8         | mitogen-activated protein kinase kinase kinase 8                            |
| 1,738 | ENSG0000006432  | MAP3K9         | mitogen-activated protein kinase kinase kinase 9                            |
| 1,027 | ENSG00000047849 | MAP4           | microtubule associated protein 4                                            |
| 1,35  | ENSG00000116871 | MAP7D1         | MAP7 domain containing 1                                                    |
| 1,197 | ENSG00000156711 | MAPK13         | mitogen-activated protein kinase 13                                         |
| 1,688 | ENSG00000138834 | MAPK8IP3       | mitogen-activated protein kinase 8 interacting protein 3                    |
| 1,198 | ENSG00000173926 | MARCH3         | membrane associated ring-CH-type finger 3                                   |
| 1,385 | ENSG00000145495 | MARCH6         | membrane associated ring-CH-type finger 6                                   |
| 1,464 | ENSG00000175130 | MARCKSL1       | MARCKS like 1                                                               |
| 1,133 | ENSG00000072518 | MARK2          | microtubule affinity regulating kinase 2                                    |
| 1,031 | ENSG00000140832 | MARVELD3       | MARVEL domain containing 3                                                  |
| 1,136 | ENSG00000164430 | MB21D1         | Mab-21 domain containing 1                                                  |
| 1,057 | ENSG00000166987 | MBD6           | methyl-CpG binding domain protein 6                                         |
| 1,11  | ENSG00000172197 | MBOAT1         | membrane bound O-acyltransferase domain containing 1                        |
| 2,004 | ENSG00000177669 | MBOAT4         | membrane bound O-acyltransferase domain containing 4                        |
| 1,199 | ENSG00000258839 | MC1R           | melanocortin 1 receptor                                                     |
| 1,568 | ENSG00000076706 | MCAM           | melanoma cell adhesion molecule                                             |
| 1,158 | ENSG00000126217 | MCF2L          | MCF.2 cell line derived transforming sequence like                          |
| 2,387 | ENSG00000143384 | MCL1           | MCL1, BCL2 family apoptosis regulator                                       |
| 1,202 | ENSG00000055732 | MCOLN3         | muco lipin 3                                                                |
| 1,081 | ENSG00000156026 | MCU            | mitochondrial calcium uniporter                                             |
| 1,347 | ENSG00000110492 | MDK            | midkine (neurite growth-promoting factor 2)                                 |
| 1,061 | ENSG00000198625 | MDM4           | MDM4, p53 regulator                                                         |
| 1,3   | ENSG00000151376 | ME3            | malic enzyme 3                                                              |
| 1,117 | ENSG00000099917 | MED15          | mediator complex subunit 15                                                 |
| 1,808 | ENSG00000163975 | MELTF          | melanotransferrin                                                           |
| 1,145 | ENSG00000140406 | MESDC1         | mesoderm development candidate 1                                            |
| 1,068 | ENSG00000166823 | MESP1          | mesoderm posterior bHLH transcription factor 1                              |
| 1,178 | ENSG00000105976 | MET            | MET proto-oncogene, receptor tyrosine kinase                                |
| 2,038 | ENSG00000214756 | METTL12        | methyltransferase like 12                                                   |
| 1,04  | ENSG00000144401 | METTL21A       | methyltransferase like 21A                                                  |
| 1,495 | ENSG00000176624 | MEX3C          | mex-3 RNA binding family member C                                           |
| 1,01  | ENSG00000147324 | MFHAS1         | malignant fibrous histiocytoma amplified sequence 1                         |
| 1,236 | ENSG00000151690 | MFSD6          | major facilitator superfamily domain containing 6                           |
| 1,086 | ENSG00000185156 | MFSD6L         | major facilitator superfamily domain containing 6 like                      |
| 1,789 | ENSG00000243156 | MICAL3         | microtubule associated monooxygenase, calponin and LIM domain containing 3  |
| 1,35  | ENSG00000167470 | MIDN           | midnolin                                                                    |
| 1,28  | ENSG00000266192 | mir-1260b      | microRNA 1260b                                                              |
| 4,592 | ENSG00000207614 | mir-193        | microRNA 193a                                                               |
| 6,182 | ENSG00000207980 | mir-23         | microRNA 23a                                                                |
| 7,78  | ENSG00000207617 | mir-3074       | microRNA 3074                                                               |
| 6,127 | ENSG00000263628 | mir-3155       | microRNA 3155a                                                              |
| 6,805 | ENSG00000199023 | mir-339        | microRNA 339                                                                |
| 4,279 | ENSG00000264462 | mir-3648       | microRNA 3648-1                                                             |
| 6,201 | ENSG00000199032 | mir-425        | microRNA 425                                                                |
| 3,211 | ENSG00000207589 | mir-506        | microRNA 508                                                                |
| 4,469 | ENSG00000207946 | mir-515        | microRNA 520c                                                               |
| 2,186 | ENSG00000207650 | mir-548        | microRNA 579                                                                |
| 5,715 | ENSG00000207716 | mir-572        | microRNA 572                                                                |
| 6,782 | ENSG00000207561 | mir-635        | microRNA 635                                                                |
| 3,98  | ENSG00000207703 | mir-7          | microRNA 7-1                                                                |
| 1,054 | ENSG00000215417 | MIR17HG        | miR-17-92a-1 cluster host gene                                              |
| 7,535 | ENSG00000266533 | MIR3619        | microRNA 3619                                                               |
| 3,905 | ENSG00000265558 | MIR3918        | microRNA 3918                                                               |
| 3,744 | ENSG00000265442 | MIR3941        | microRNA 3941                                                               |
| 5,905 | ENSG00000264171 | MIR4305        | microRNA 4305                                                               |
| 4,259 | ENSG00000263583 | MIR4522        | microRNA 4522                                                               |
| 6,184 | ENSG00000263834 | MIR4635        | microRNA 4635                                                               |
| 6,799 | ENSG00000263575 | MIR4665        | microRNA 4665                                                               |
| 2,27  | ENSG00000099812 | MISP           | mitotic spindle positioning                                                 |
| 1,982 | ENSG00000178053 | MLF1           | myeloid leukemia factor 1                                                   |
| 1,33  | ENSG00000171843 | MLLT3          | MLLT3, super elongation complex subunit                                     |
| 2,395 | ENSG00000196611 | MMP1           | matrix metalloproteinase 1                                                  |
| 1,701 | ENSG00000166670 | MMP10          | matrix metalloproteinase 10                                                 |
| 1,057 | ENSG00000157227 | MMP14          | matrix metalloproteinase 14                                                 |
| 1,259 | ENSG00000102996 | MMP15          | matrix metalloproteinase 15                                                 |
| 1,368 | ENSG00000123342 | MMP19          | matrix metalloproteinase 19                                                 |

|       |                  |                          |                                                                                                     |
|-------|------------------|--------------------------|-----------------------------------------------------------------------------------------------------|
| 1,195 | ENSG00000125966  | MMP24                    | matrix metalloproteinase 24                                                                         |
| 2,578 | ENSG00000137673  | MMP7                     | matrix metalloproteinase 7                                                                          |
| 1,124 | ENSG00000130675  | MXN1                     | motor neuron and pancreas homeobox 1                                                                |
| 1,446 | ENSG00000120162  | MOB3B                    | MOB kinase activator 3B                                                                             |
| 1,216 | ENSG00000161647  | MPP3                     | membrane palmitoylated protein 3                                                                    |
| 1,061 | ENSG00000133030  | MPRIIP                   | myosin phosphatase Rho interacting protein                                                          |
| 1,382 | ENSG00000160588  | MPZL3                    | myelin protein zero like 3                                                                          |
| 1,037 | ENSG00000174579  | MSL2                     | male-specific lethal 2 homolog (Drosophila)                                                         |
| 1,649 | ENSG00000163132  | MSX1                     | msh homeobox 1                                                                                      |
| 1,109 | ENSG00000120149  | MSX2                     | msh homeobox 2                                                                                      |
| 1,797 | ENSG00000256618  | MTRNR2L1                 | MT-RNR2-like 1                                                                                      |
| 1,654 | ENSG00000256045  | MTRNR2L10                | MT-RNR2-like 10                                                                                     |
| 1,672 | ENSG00000271043  | MTRNR2L2                 | MT-RNR2-like 2                                                                                      |
| 1,627 | ENSG00000255823  | MTRNR2L8                 | MT-RNR2-like 8                                                                                      |
| 1,552 | ENSG00000185499  | MUC1                     | mucin 1, cell surface associated                                                                    |
| 1,553 | ENSG00000176945  | MUC20                    | mucin 20, cell surface associated                                                                   |
| 1,17  | ENSG00000117983  | MUC5B                    | mucin 5B, oligomeric mucus/gel-forming                                                              |
| 3,706 | ENSG00000184956  | MUC6                     | mucin 6, oligomeric mucus/gel-forming                                                               |
| 1,638 | ENSG00000157502  | MUM1L1                   | MUM1 like 1                                                                                         |
| 2,732 | ENSG00000059728  | MXD1                     | MAX dimerization protein 1                                                                          |
| 2,2   | ENSG00000179820  | MYADM                    | myeloid associated differentiation marker                                                           |
| 1,069 | ENSG00000132382  | MYBBP1A                  | MYB binding protein 1a                                                                              |
| 2,293 | ENSG00000136997  | MYC                      | MYC proto-oncogene, bHLH transcription factor                                                       |
| 1,443 | ENSG00000104177  | MYEF2                    | myelin expression factor 2                                                                          |
| 1,423 | ENSG00000105357  | MYH14                    | myosin heavy chain 14                                                                               |
| 1,785 | ENSG00000100345  | MYH9                     | myosin heavy chain 9                                                                                |
| 2,022 | ENSG0000007944   | MYLIP                    | myosin regulatory light chain interacting protein                                                   |
| 1,981 | ENSG00000145555  | MYO10                    | myosin X                                                                                            |
| 1,007 | ENSG00000197879  | MYO1C                    | myosin IC                                                                                           |
| 1,064 | ENSG00000157483  | MYO1E                    | myosin IE                                                                                           |
| 1,324 | ENSG00000095777  | MYO3A                    | myosin IIIA                                                                                         |
| 1,336 | ENSG00000128833  | MYO5C                    | myosin VC                                                                                           |
| 1,155 | ENSG00000196586  | MYO6                     | myosin VI                                                                                           |
| 1,196 | ENSG00000138119  | MYOF                     | myoferlin                                                                                           |
| 1,202 | ENSG00000263155  | MYZAP                    | myocardial zonula adherens protein                                                                  |
| 1,396 | ENSG00000099326  | MZF1                     | myeloid zinc finger 1                                                                               |
| 1,46  | ENSG00000172766  | NAA16                    | N(alpha)-acetyltransferase 16, NatA auxiliary subunit                                               |
| 1,088 | ENSG00000110583  | NAA40                    | N(alpha)-acetyltransferase 40, NatD catalytic subunit                                               |
| 1,472 | ENSG00000177694  | NAALADL2                 | N-acetylated alpha-linked acidic dipeptidase like 2                                                 |
| 1,111 | ENSG00000172915  | NBEA                     | neurobeachin                                                                                        |
| 1,397 | ENSG00000160796  | NBEAL2                   | neurobeachin like 2                                                                                 |
| 3,119 | ENSG00000144959  | NCEH1                    | neutral cholesterol ester hydrolase 1                                                               |
| 1,98  | ENSG00000071051  | NCK2                     | NCK adaptor protein 2                                                                               |
| 2,972 | ENSG00000111912  | NCOA7                    | nuclear receptor coactivator 7                                                                      |
| 1,118 | ENSG00000141027  | NCOR1                    | nuclear receptor corepressor 1                                                                      |
| 1,536 | ENSG00000245532  | NEAT1                    | nuclear paraspeckle assembly transcript 1 (non-protein coding)                                      |
| 1,306 | ENSG00000130202  | NECTIN2                  | nectin cell adhesion molecule 2                                                                     |
| 2,153 | ENSG00000143217  | NECTIN4                  | nectin cell adhesion molecule 4                                                                     |
| 1,516 | ENSG00000049759  | NEDD4L                   | neural precursor cell expressed, developmentally down-regulated 4-like, E3 ubiquitin protein ligase |
| 2,514 | ENSG00000111859  | NEDD9                    | neural precursor cell expressed, developmentally down-regulated 9                                   |
| 1,026 | ENSG00000114670  | NEK11                    | NIMA related kinase 11                                                                              |
| 1,029 | ENSG00000160602  | NEK8                     | NIMA related kinase 8                                                                               |
| 1,238 | ENSG00000067141  | NEO1                     | neogenin 1                                                                                          |
| 1,215 | ENSG00000173848  | NET1                     | neuroepithelial cell transforming 1                                                                 |
| 2,183 | ENSG00000163121  | NEURL3                   | neuralized E3 ubiquitin protein ligase 3                                                            |
| 1,374 | ENSG00000102908  | NFAT5                    | nuclear factor of activated T-cells 5                                                               |
| 2,113 | ENSG00000131196  | NFATC1                   | nuclear factor of activated T-cells 1                                                               |
| 1,915 | ENSG00000050344  | NFE2L3                   | nuclear factor, erythroid 2 like 3                                                                  |
| 1,484 | ENSG00000165030  | NFIL3                    | nuclear factor, interleukin 3 regulated                                                             |
| 1,517 | ENSG00000109320  | NFKB1                    | nuclear factor kappa B subunit 1                                                                    |
| 1,655 | ENSG00000077150  | NFKB2                    | nuclear factor kappa B subunit 2                                                                    |
| 1,589 | ENSG00000167604  | NFKBID                   | NFKB inhibitor delta                                                                                |
| 2,028 | ENSG00000146232  | NFKBIE                   | NFKB inhibitor epsilon                                                                              |
| 4,124 | ENSG00000144802  | NFKBIZ                   | NFKB inhibitor zeta                                                                                 |
| 1,387 | ENSG00000001167  | NFYA                     | nuclear transcription factor Y subunit alpha                                                        |
| 1,089 | ENSG00000101004  | NINL                     | ninein like                                                                                         |
| 1,114 | ENSG00000167034  | NKX3-1                   | NK3 homeobox 1                                                                                      |
| 1,116 | ENSG00000165246  | NLGN4Y                   | neuroligin 4, Y-linked                                                                              |
| 1,597 | ENSG00000197696  | NMB                      | neuromedin B                                                                                        |
| 2,061 | ENSG00000112981  | NME5                     | NME/NM23 family member 5                                                                            |
| 1,374 | ENSG00000151014  | NOCT                     | nocturnin                                                                                           |
| 1,501 | ENSG00000188747  | NOXA1                    | NADPH oxidase activator 1                                                                           |
| 1,161 | ENSG00000170485  | NPAS2                    | neuronal PAS domain protein 2                                                                       |
| 2,111 | ENSG00000141458  | NPC1                     | NPC intracellular cholesterol transporter 1                                                         |
| 1,154 | ENSG000000015520 | NPC1L1                   | NPC1 like intracellular cholesterol transporter 1                                                   |
| 1,164 | ENSG00000215440  | NPEPL1                   | aminopeptidase-like 1                                                                               |
| 1,201 | ENSG00000141279  | NPEPPS                   | aminopeptidase puromycin sensitive                                                                  |
| 1,314 | ENSG00000183426  | NPIPA7 (includes others) | nuclear pore complex interacting protein family member A7                                           |
| 1,601 | ENSG00000169246  | NPIP85 (includes others) | nuclear pore complex interacting protein family member B4                                           |
| 1,683 | ENSG00000168743  | NPNT                     | nephronectin                                                                                        |
| 1,551 | ENSG00000106236  | NPTX2                    | neuronal pentraxin 2                                                                                |

|       |                 |                 |                                                           |
|-------|-----------------|-----------------|-----------------------------------------------------------|
| 1,606 | ENSG00000131910 | NR0B2           | nuclear receptor subfamily 0 group B member 2             |
| 1,249 | ENSG00000126368 | NR1D1           | nuclear receptor subfamily 1 group D member 1             |
| 1,974 | ENSG00000123358 | NR4A1           | nuclear receptor subfamily 4 group A member 1             |
| 1,052 | ENSG00000153234 | NR4A2           | nuclear receptor subfamily 4 group A member 2             |
| 1,869 | ENSG00000198435 | NRARP           | NOTCH-regulated ankyrin repeat protein                    |
| 1,08  | ENSG00000091129 | NRCAM           | neuronal cell adhesion molecule                           |
| 1,378 | ENSG00000157168 | NRG1            | neuregulin 1                                              |
| 1,199 | ENSG00000180530 | NRIP1           | nuclear receptor interacting protein 1                    |
| 1,014 | ENSG00000147548 | NSD3            | nuclear receptor binding SET domain protein 3             |
| 1,537 | ENSG00000179299 | NSUN7           | NOP2/Sun RNA methyltransferase family member 7            |
| 1,044 | ENSG00000074527 | NTN4            | netrin 4                                                  |
| 4,455 | ENSG00000163545 | NUAK2           | NUAK family kinase 2                                      |
| 1,207 | ENSG00000108256 | NUFIP2          | NUFIP2, FMR1 interacting protein 2                        |
| 1,511 | ENSG00000137497 | NUMA1           | nuclear mitotic apparatus protein 1                       |
| 1,372 | ENSG00000137804 | NUSAP1          | nucleolar and spindle associated protein 1                |
| 1,334 | ENSG00000162231 | NXF1            | nuclear RNA export factor 1                               |
| 1,049 | ENSG00000167693 | NXN             | nucleoredoxin                                             |
| 1,601 | ENSG00000124006 | OBSL1           | obscurin like 1                                           |
| 1,142 | ENSG00000122417 | ODF2L           | outer dense fiber of sperm tails 2 like                   |
| 1,332 | ENSG00000046651 | OFD1            | OFD1, centriole and centriolar satellite protein          |
| 1,627 | ENSG00000173391 | OLR1            | oxidized low density lipoprotein receptor 1               |
| 2,071 | ENSG00000169856 | ONECUT1         | one cut homeobox 1                                        |
| 1,813 | ENSG00000079482 | OPHN1           | oligophrenin 1                                            |
| 1,264 | ENSG00000177535 | OR2B11          | olfactory receptor family 2 subfamily B member 11         |
| 1,163 | ENSG00000115947 | ORC4            | origin recognition complex subunit 4                      |
| 1,644 | ENSG00000165312 | OTUD1           | OTU deubiquitinase 1                                      |
| 1,084 | ENSG00000189401 | OTUD6A          | OTU deubiquitinase 6A                                     |
| 2,736 | ENSG00000172818 | OVOL1           | ovo like transcriptional repressor 1                      |
| 2,629 | ENSG00000180914 | OXTR            | oxytocin receptor                                         |
| 1,541 | ENSG00000169860 | P2RY1           | purinergic receptor P2Y1                                  |
| 1,42  | ENSG00000101104 | PABPC1L         | poly(A) binding protein cytoplasmic 1 like                |
| 1,223 | ENSG00000100836 | PABPN1          | poly(A) binding protein nuclear 1                         |
| 1,283 | ENSG00000165912 | PACSIN3         | protein kinase C and casein kinase substrate in neurons 3 |
| 1,288 | ENSG00000077264 | PAK3            | p21 (RAC1) activated kinase 3                             |
| 1,634 | ENSG00000187867 | PALM3           | paralemmin 3                                              |
| 1,185 | ENSG00000135473 | PAN2            | PAN2 poly(A) specific ribonuclease subunit                |
| 1,026 | ENSG00000152520 | PAN3            | PAN3 poly(A) specific ribonuclease subunit                |
| 1,697 | ENSG00000100767 | PAPLN           | papilin, proteoglycan like sulfated glycoprotein          |
| 1,346 | ENSG00000138801 | PAPSS1          | 3'-phosphoadenosine 5'-phosphosulfate synthase 1          |
| 1,027 | ENSG00000162073 | PAQR4           | progesterin and adipoQ receptor family member 4           |
| 1,475 | ENSG00000137819 | PAQR5           | progesterin and adipoQ receptor family member 5           |
| 1,07  | ENSG00000148498 | PARD3           | par-3 family cell polarity regulator                      |
| 1,088 | ENSG00000116117 | PARD3B          | par-3 family cell polarity regulator beta                 |
| 2,084 | ENSG00000124171 | PARD6B          | par-6 family cell polarity regulator beta                 |
| 1,203 | ENSG00000041880 | PARP3           | poly(ADP-ribose) polymerase family member 3               |
| 1,739 | ENSG00000132849 | PATJ            | PATJ, crumbs cell polarity complex component              |
| 1,31  | ENSG00000177425 | PAWR            | pro-apoptotic WT1 regulator                               |
| 1,085 | ENSG00000120327 | PCDHB14         | protocadherin beta 14                                     |
| 1,524 | ENSG00000165494 | PCF11           | PCF11 cleavage and polyadenylation factor subunit         |
| 1,146 | ENSG00000186472 | PCLO            | piccolo presynaptic cytomatrix protein                    |
| 1,002 | ENSG00000183036 | PCP4            | Purkinje cell protein 4                                   |
| 1,059 | ENSG00000138735 | PDE5A           | phosphodiesterase 5A                                      |
| 1,205 | ENSG00000160191 | PDE9A           | phosphodiesterase 9A                                      |
| 1,434 | ENSG00000145431 | PDGFC           | platelet derived growth factor C                          |
| 1,292 | ENSG00000170962 | PDGFD           | platelet derived growth factor D                          |
| 1,607 | ENSG00000164951 | PDP1            | pyruvate dehydrogenase phosphatase catalytic subunit 1    |
| 1,008 | ENSG00000196696 | PDXDC2P-NPIP14P | nuclear pore complex-interacting protein                  |
| 1,5   | ENSG00000172367 | PDZD3           | PDZ domain containing 3                                   |
| 1,121 | ENSG00000165650 | PDZD8           | PDZ domain containing 8                                   |
| 1,071 | ENSG00000162366 | PDZK1IP1        | PDZK1 interacting protein 1                               |
| 1,572 | ENSG00000142265 | PEG10           | paternally expressed 10                                   |
| 1,307 | ENSG00000197329 | PELI1           | pellino E3 ubiquitin protein ligase 1                     |
| 1,419 | ENSG00000179094 | PER1            | period circadian clock 1                                  |
| 1,837 | ENSG00000132326 | PER2            | period circadian clock 2                                  |
| 1,814 | ENSG00000109272 | PF4V1           | platelet factor 4 variant 1                               |
| 1,103 | ENSG00000178921 | PFAS            | phosphoribosylformylglycinamide synthase                  |
| 2,111 | ENSG00000170525 | PFKFB3          | 6-phosphofructo-2-kinase/fructose-2,6-bisphosphatase 3    |
| 1,442 | ENSG00000067057 | PFKP            | phosphofructokinase, platelet                             |
| 4,017 | ENSG00000096088 | PGC             | progastricin                                              |
| 2,25  | ENSG00000142102 | PGGHG           | protein-glucosylgalactosylhydroxylysine glucosidase       |
| 1,078 | ENSG00000165434 | PGM2L1          | phosphoglucomutase 2 like 1                               |
| 1,104 | ENSG00000204138 | PHACTR4         | phosphatase and actin regulator 4                         |
| 1,62  | ENSG00000111752 | PHC1            | polyhomeotic homolog 1                                    |
| 1,179 | ENSG00000116273 | PHF13           | PHD finger protein 13                                     |
| 1,103 | ENSG00000146247 | PHIP            | pleckstrin homology domain interacting protein            |
| 2,794 | ENSG00000181649 | PHLDA2          | pleckstrin homology like domain family A member 2         |
| 1,012 | ENSG00000183506 | PI4KAP2         | phosphatidylinositol 4-kinase alpha pseudogene 2          |
| 1,352 | ENSG00000103335 | PIEZO1          | piezo type mechanosensitive ion channel component 1       |
| 1,671 | ENSG00000162896 | PIGR            | polymeric immunoglobulin receptor                         |
| 1,547 | ENSG00000121716 | PILRB           | paired immunoglobulin-like type 2 receptor beta           |
| 1,718 | ENSG00000137193 | PIM1            | Pim-1 proto-oncogene, serine/threonine kinase             |

|       |                 |           |                                                                         |
|-------|-----------------|-----------|-------------------------------------------------------------------------|
| 1,653 | ENSG00000198355 | PIM3      | Pim-3 proto-oncogene, serine/threonine kinase                           |
| 1,176 | ENSG00000143398 | PIP5K1A   | phosphatidylinositol-4-phosphate 5-kinase type 1 alpha                  |
| 1,089 | ENSG00000241878 | PISD      | phosphatidylserine decarboxylase                                        |
| 1,992 | ENSG00000134627 | PIWIL4    | piwi like RNA-mediated gene silencing 4                                 |
| 1,076 | ENSG00000181191 | PJA1      | praja ring finger ubiquitin ligase 1                                    |
| 1,15  | ENSG00000008710 | PKD1      | polycystin 1, transient receptor potential channel interacting          |
| 1,906 | ENSG00000170927 | PKHD1     | PKHD1, fibrocystin/polyductin                                           |
| 1,535 | ENSG00000184363 | PKP3      | plakophilin 3                                                           |
| 1,621 | ENSG00000243708 | PLA2G4B   | phospholipase A2 group IVB                                              |
| 1,281 | ENSG00000184381 | PLA2G6    | phospholipase A2 group VI                                               |
| 1,007 | ENSG00000126003 | PLAGL2    | PLAG1 like zinc finger 2                                                |
| 2,616 | ENSG00000011422 | PLAUR     | plasminogen activator, urokinase receptor                               |
| 1,36  | ENSG00000161714 | PLCD3     | phospholipase C delta 3                                                 |
| 1,233 | ENSG00000129219 | PLD2      | phospholipase D2                                                        |
| 1,009 | ENSG00000143850 | PLEKHA6   | pleckstrin homology domain containing A6                                |
| 1,432 | ENSG00000166689 | PLEKHA7   | pleckstrin homology domain containing A7                                |
| 2,222 | ENSG00000021300 | PLEKHB1   | pleckstrin homology domain containing B1                                |
| 1,372 | ENSG00000126822 | PLEKHG3   | pleckstrin homology and RhoGEF domain containing G3                     |
| 1,64  | ENSG00000008323 | PLEKHG6   | pleckstrin homology and RhoGEF domain containing G6                     |
| 1,145 | ENSG00000214176 | PLEKHM1P1 | pleckstrin homology and RUN domain containing M1 pseudogene 1           |
| 2,923 | ENSG00000145632 | PLK2      | polo like kinase 2                                                      |
| 2,553 | ENSG00000173846 | PLK3      | polo like kinase 3                                                      |
| 1,086 | ENSG00000102934 | PLLP      | plasmolipin                                                             |
| 2,077 | ENSG00000141934 | PLPP2     | phospholipid phosphatase 2                                              |
| 1,927 | ENSG00000164050 | PLXNB1    | plexin B1                                                               |
| 1,011 | ENSG00000196576 | PLXNB2    | plexin B2                                                               |
| 4,301 | ENSG00000141682 | PMAIP1    | phorbol-12-myristate-13-acetate-induced protein 1                       |
| 2,268 | ENSG00000124225 | PMEPA1    | prostate transmembrane protein, androgen induced 1                      |
| 1,332 | ENSG00000132424 | PNISR     | PNN interacting serine and arginine rich protein                        |
| 1,206 | ENSG00000100941 | PNN       | pinin, desmosome associated protein                                     |
| 1,4   | ENSG00000177666 | PNPLA2    | patatin like phospholipase domain containing 2                          |
| 1,39  | ENSG00000146278 | PNRC1     | proline rich nuclear receptor coactivator 1                             |
| 1,508 | ENSG00000124429 | POF1B     | premature ovarian failure, 1B                                           |
| 1,225 | ENSG00000143442 | POGZ      | pogo transposable element derived with ZNF domain                       |
| 1,655 | ENSG00000181222 | POLR2A    | RNA polymerase II subunit A                                             |
| 1,099 | ENSG00000009830 | POMT2     | protein O-mannosyltransferase 2                                         |
| 1,055 | ENSG00000137709 | POU2F3    | POU class 2 homeobox 3                                                  |
| 1,559 | ENSG00000185668 | POU3F1    | POU class 3 homeobox 1                                                  |
| 1,233 | ENSG00000106536 | POU6F2    | POU class 6 homeobox 2                                                  |
| 1,221 | ENSG00000112033 | PPARD     | peroxisome proliferator activated receptor delta                        |
| 2,242 | ENSG00000118898 | PPL       | periplakin                                                              |
| 1,059 | ENSG00000170836 | PPM1D     | protein phosphatase, Mg2+/Mn2+ dependent 1D                             |
| 1,593 | ENSG00000088808 | PPP1R13B  | protein phosphatase 1 regulatory subunit 13B                            |
| 2,1   | ENSG00000104881 | PPP1R13L  | protein phosphatase 1 regulatory subunit 13 like                        |
| 4,549 | ENSG00000087074 | PPP1R15A  | protein phosphatase 1 regulatory subunit 15A                            |
| 1,493 | ENSG00000158615 | PPP1R15B  | protein phosphatase 1 regulatory subunit 15B                            |
| 1,592 | ENSG00000196422 | PPP1R26   | protein phosphatase 1 regulatory subunit 26                             |
| 1,147 | ENSG00000158528 | PPP1R9A   | protein phosphatase 1 regulatory subunit 9A                             |
| 1,139 | ENSG00000156475 | PPP2R2B   | protein phosphatase 2 regulatory subunit Bbeta                          |
| 1,103 | ENSG00000124224 | PPP4R1L   | protein phosphatase 4 regulatory subunit 1 like (pseudogene)            |
| 1,775 | ENSG00000148840 | PPRC1     | peroxisome proliferator-activated receptor gamma, coactivator-related 1 |
| 1,148 | ENSG00000196850 | PPTC7     | PTC7 protein phosphatase homolog                                        |
| 1,622 | ENSG00000139174 | PRICKLE1  | prickle planar cell polarity protein 1                                  |
| 1,046 | ENSG00000124593 | PRICKLE4  | prickle planar cell polarity protein 4                                  |
| 1,04  | ENSG00000162409 | PRKAA2    | protein kinase AMP-activated catalytic subunit alpha 2                  |
| 1,206 | ENSG00000163932 | PRKCD     | protein kinase C delta                                                  |
| 1,049 | ENSG00000105287 | PRKD2     | protein kinase D2                                                       |
| 2,385 | ENSG00000007062 | PROM1     | prominin 1                                                              |
| 1,413 | ENSG00000110844 | PRPF40B   | pre-mRNA processing factor 40 homolog B                                 |
| 1,669 | ENSG00000131188 | PRR7      | proline rich 7, synaptic                                                |
| 1,124 | ENSG00000130723 | PRRC2B    | proline rich coiled-coil 2B                                             |
| 1,236 | ENSG00000117523 | PRRC2C    | proline rich coiled-coil 2C                                             |
| 3,412 | ENSG00000005001 | PRSS22    | protease, serine 22                                                     |
| 1,771 | ENSG00000206549 | PRSS50    | protease, serine 50                                                     |
| 2,032 | ENSG00000052344 | PRSS8     | protease, serine 8                                                      |
| 1,399 | ENSG00000125650 | PSPN      | persephin                                                               |
| 1,086 | ENSG00000011304 | PTBP1     | polypyrimidine tract binding protein 1                                  |
| 1,029 | ENSG00000117569 | PTBP2     | polypyrimidine tract binding protein 2                                  |
| 1,442 | ENSG00000244694 | PTCHD4    | patched domain containing 4                                             |
| 1,272 | ENSG00000122420 | PTGFR     | prostaglandin F receptor                                                |
| 1,262 | ENSG00000134247 | PTGFRN    | prostaglandin F2 receptor inhibitor                                     |
| 2,333 | ENSG00000087494 | PTHLH     | parathyroid hormone like hormone                                        |
| 1,41  | ENSG00000163629 | PTPN13    | protein tyrosine phosphatase, non-receptor type 13                      |
| 1,031 | ENSG00000152104 | PTPN14    | protein tyrosine phosphatase, non-receptor type 14                      |
| 1,521 | ENSG00000153707 | PTPRD     | protein tyrosine phosphatase, receptor type D                           |
| 1,025 | ENSG00000142949 | PTPRF     | protein tyrosine phosphatase, receptor type F                           |
| 1,215 | ENSG00000152894 | PTPRK     | protein tyrosine phosphatase, receptor type K                           |
| 1,163 | ENSG00000173482 | PTPRM     | protein tyrosine phosphatase, receptor type M                           |
| 1,115 | ENSG00000146676 | PURB      | purine rich element binding protein B                                   |
| 1,069 | ENSG00000171813 | PWWP2B    | PWWP domain containing 2B                                               |
| 1,314 | ENSG00000130508 | PXDN      | peroxidasin                                                             |

|       |                 |                         |                                                                      |
|-------|-----------------|-------------------------|----------------------------------------------------------------------|
| 1,547 | ENSG00000100994 | PYGB                    | glycogen phosphorylase B                                             |
| 2,867 | ENSG00000156675 | RAB11FIP1               | RAB11 family interacting protein 1                                   |
| 1,234 | ENSG00000135631 | RAB11FIP5               | RAB11 family interacting protein 5                                   |
| 1,167 | ENSG00000146955 | RAB19                   | RAB19, member RAS oncogene family                                    |
| 1,359 | ENSG00000132698 | RAB25                   | RAB25, member RAS oncogene family                                    |
| 1,109 | ENSG00000100228 | RAB36                   | RAB36, member RAS oncogene family                                    |
| 1,107 | ENSG00000123892 | RAB38                   | RAB38, member RAS oncogene family                                    |
| 1,738 | ENSG00000127328 | RAB3IP                  | RAB3A interacting protein                                            |
| 1,631 | ENSG00000108557 | RAI1                    | retinoic acid induced 1                                              |
| 1,493 | ENSG00000131831 | RAI2                    | retinoic acid induced 2                                              |
| 1,287 | ENSG00000174373 | RALGAPA1                | Ral GTPase activating protein catalytic alpha subunit 1              |
| 1,442 | ENSG00000160271 | RALGDS                  | ral guanine nucleotide dissociation stimulator                       |
| 1,249 | ENSG00000136828 | RALGPS1                 | Ral GEF with PH domain and SH3 binding motif 1                       |
| 1,861 | ENSG00000184672 | RALYL                   | RALY RNA binding protein-like                                        |
| 1,355 | ENSG00000100401 | RANGAP1                 | Ran GTPase activating protein 1                                      |
| 1,327 | ENSG00000076864 | RAP1GAP                 | RAP1 GTPase activating protein                                       |
| 1,261 | ENSG00000132359 | RAP1GAP2                | RAP1 GTPase activating protein 2                                     |
| 1,745 | ENSG00000181467 | RAP2B                   | RAP2B, member of RAS oncogene family                                 |
| 1,163 | ENSG00000077092 | RARB                    | retinoic acid receptor beta                                          |
| 1,513 | ENSG00000172819 | RARG                    | retinoic acid receptor gamma                                         |
| 1,332 | ENSG00000111344 | RASAL1                  | RAS protein activator like 1                                         |
| 1,495 | ENSG00000108551 | RASD1                   | ras related dexamethasone induced 1                                  |
| 2,469 | ENSG00000165105 | RASEF                   | RAS and EF-hand domain containing                                    |
| 1,578 | ENSG00000107551 | RASSF4                  | Ras association domain family member 4                               |
| 1,16  | ENSG00000169435 | RASSF6                  | Ras association domain family member 6                               |
| 1,492 | ENSG00000123094 | RASSF8                  | Ras association domain family member 8                               |
| 3,392 | ENSG00000198774 | RASSF9                  | Ras association domain family member 9                               |
| 1,12  | ENSG00000161847 | RAVER1                  | ribonucleoprotein, PTB binding 1                                     |
| 1,195 | ENSG00000162437 | RAVER2                  | ribonucleoprotein, PTB binding 2                                     |
| 1,791 | ENSG00000122257 | RBBP6                   | RB binding protein 6, ubiquitin ligase                               |
| 1,046 | ENSG00000101773 | RBBP8                   | RB binding protein 8, endonuclease                                   |
| 1,097 | ENSG00000239306 | RBM14                   | RNA binding motif protein 14                                         |
| 1,554 | ENSG00000162775 | RBM15                   | RNA binding motif protein 15                                         |
| 1,091 | ENSG00000122965 | RBM19                   | RNA binding motif protein 19                                         |
| 1,053 | ENSG00000119707 | RBM25                   | RNA binding motif protein 25                                         |
| 1,549 | ENSG00000132819 | RBM38                   | RNA binding motif protein 38                                         |
| 1,283 | ENSG00000131051 | RBM39                   | RNA binding motif protein 39                                         |
| 1,27  | ENSG00000004534 | RBM6                    | RNA binding motif protein 6                                          |
| 1,112 | ENSG00000076067 | RBMS2                   | RNA binding motif single stranded interacting protein 2              |
| 1,043 | ENSG00000157110 | RBPMS                   | RNA binding protein with multiple splicing                           |
| 1,198 | ENSG00000135870 | RC3H1                   | ring finger and CCCH-type domains 1                                  |
| 1,069 | ENSG00000179051 | RCC2                    | regulator of chromosome condensation 2                               |
| 2,105 | ENSG00000100918 | REC8                    | REC8 meiotic recombination protein                                   |
| 1,936 | ENSG00000162924 | REL                     | REL proto-oncogene, NF-kB subunit                                    |
| 1,721 | ENSG00000104856 | RELB                    | RELB proto-oncogene, NF-kB subunit                                   |
| 1,525 | ENSG00000139890 | REM2                    | RRAD and GEM like GTPase 2                                           |
| 1,089 | ENSG00000142599 | RERE                    | arginine-glutamic acid dipeptide repeats                             |
| 1,173 | ENSG00000223638 | RFPL4A/RFPL4AL1         | ret finger protein like 4A                                           |
| 1,678 | ENSG00000087903 | RFX2                    | regulatory factor X2                                                 |
| 1,783 | ENSG00000205517 | RGL3                    | ral guanine nucleotide dissociation stimulator like 3                |
| 1,599 | ENSG00000169629 | RGPD4 (includes others) | RANBP2-like and GRIP domain containing 5                             |
| 1,148 | ENSG00000091844 | RGS17                   | regulator of G protein signaling 17                                  |
| 2,87  | ENSG00000117152 | RGS4                    | regulator of G protein signaling 4                                   |
| 1,711 | ENSG00000007384 | RHBDF1                  | rhomboid 5 homolog 1                                                 |
| 1,634 | ENSG00000129667 | RHBDF2                  | rhomboid 5 homolog 2                                                 |
| 1,676 | ENSG00000158315 | RHBDL2                  | rhomboid like 2                                                      |
| 1,695 | ENSG00000143878 | RHOB                    | ras homolog family member B                                          |
| 1,009 | ENSG00000140983 | RHOT2                   | ras homolog family member T2                                         |
| 2,817 | ENSG00000104140 | RHOV                    | ras homolog family member V                                          |
| 1,746 | ENSG00000131941 | RHPN2                   | rhophilin Rho GTPase binding protein 2                               |
| 1,155 | ENSG00000166405 | RIC3                    | RIC3 acetylcholine receptor chaperone                                |
| 1,711 | ENSG00000111785 | RIC8B                   | RIC8 guanine nucleotide exchange factor B                            |
| 1,963 | ENSG00000104312 | RIPK2                   | receptor interacting serine/threonine kinase 2                       |
| 2,824 | ENSG00000183421 | RIPK4                   | receptor interacting serine/threonine kinase 4                       |
| 1,548 | ENSG00000117000 | RLF                     | rearranged L-myc fusion                                              |
| 1,131 | ENSG00000172602 | RND1                    | Rho family GTPase 1                                                  |
| 1,884 | ENSG00000034677 | RNF19A                  | ring finger protein 19A, RBR E3 ubiquitin protein ligase             |
| 1,719 | ENSG00000116514 | RNF19B                  | ring finger protein 19B                                              |
| 1,538 | ENSG00000158286 | RNF207                  | ring finger protein 207                                              |
| 1,113 | ENSG00000173821 | RNF213                  | ring finger protein 213                                              |
| 1,03  | ENSG00000237330 | RNF223                  | ring finger protein 223                                              |
| 1,322 | ENSG00000108375 | RNF43                   | ring finger protein 43                                               |
| 1,16  | ENSG00000185946 | RNPC3                   | RNA binding region (RNP1, RRM) containing 3                          |
| 3,754 | ENSG00000166592 | RRAD                    | RRAD, Ras related glycolysis inhibitor and calcium channel regulator |
| 1,47  | ENSG00000052749 | RRP12                   | ribosomal RNA processing 12 homolog                                  |
| 1,042 | ENSG00000182841 | RRP7BP                  | ribosomal RNA processing 7 homolog B, pseudogene                     |
| 1,356 | ENSG00000160188 | RSPH1                   | radial spoke head 1 homolog                                          |
| 1,054 | ENSG00000130363 | RSPH3                   | radial spoke 3 homolog                                               |
| 1,259 | ENSG00000111011 | RSRC2                   | arginine and serine rich coiled-coil 2                               |
| 1,906 | ENSG00000117616 | RSRP1                   | arginine and serine rich protein 1                                   |
| 1,151 | ENSG00000185924 | RTN4RL1                 | reticulon 4 receptor like 1                                          |

|       |                 |          |                                                                     |
|-------|-----------------|----------|---------------------------------------------------------------------|
| 1,156 | ENSG00000159216 | RUNX1    | runt related transcription factor 1                                 |
| 1,026 | ENSG00000160753 | RUSC1    | RUN and SH3 domain containing 1                                     |
| 2,041 | ENSG00000198853 | RUSC2    | RUN and SH3 domain containing 2                                     |
| 1,323 | ENSG00000197747 | S100A10  | S100 calcium binding protein A10                                    |
| 1,258 | ENSG00000163191 | S100A11  | S100 calcium binding protein A11                                    |
| 1,736 | ENSG00000189334 | S100A14  | S100 calcium binding protein A14                                    |
| 1,255 | ENSG00000188015 | S100A3   | S100 calcium binding protein A3                                     |
| 1,703 | ENSG00000197956 | S100A6   | S100 calcium binding protein A6                                     |
| 1,34  | ENSG00000160633 | SAFB     | scaffold attachment factor B                                        |
| 1,027 | ENSG00000130254 | SAFB2    | scaffold attachment factor B2                                       |
| 1,169 | ENSG00000141858 | SAMD1    | sterile alpha motif domain containing 1                             |
| 1,182 | ENSG0000020577  | SAMD4A   | sterile alpha motif domain containing 4A                            |
| 1,118 | ENSG00000205307 | SAP25    | Sin3A associated protein 25                                         |
| 1,05  | ENSG00000100241 | SBF1     | SET binding factor 1                                                |
| 1,145 | ENSG00000188322 | SBK1     | SH3 domain binding kinase 1                                         |
| 1,054 | ENSG00000213079 | SCAF8    | SR-related CTD associated factor 8                                  |
| 1,058 | ENSG00000140386 | SCAPER   | S-phase cyclin A associated protein in the ER                       |
| 1,55  | ENSG00000252010 | SCARNA5  | small Cajal body-specific RNA 5                                     |
| 4,481 | ENSG00000251733 | SCARNA8  | small Cajal body-specific RNA 8                                     |
| 1,878 | ENSG00000145284 | SCD5     | stearoyl-CoA desaturase 5                                           |
| 1,616 | ENSG00000079689 | SCGN     | secretagogin, EF-hand calcium binding protein                       |
| 1,528 | ENSG00000111319 | SCNN1A   | sodium channel epithelial 1 alpha subunit                           |
| 1,922 | ENSG00000136193 | SCRN1    | secernin 1                                                          |
| 2,981 | ENSG00000080293 | SCTR     | secretin receptor                                                   |
| 1,044 | ENSG00000124145 | SDC4     | syndecan 4                                                          |
| 1,416 | ENSG00000185485 | SDHAP1   | succinate dehydrogenase complex flavoprotein subunit A pseudogene 1 |
| 1,146 | ENSG00000215837 | SDHAP2   | succinate dehydrogenase complex flavoprotein subunit A pseudogene 2 |
| 1,088 | ENSG00000214491 | SEC14L6  | SEC14 like lipid binding 6                                          |
| 1,519 | ENSG00000091490 | SEL1L3   | SEL1L family member 3                                               |
| 4,02  | ENSG00000007908 | SELE     | selectin E                                                          |
| 1,658 | ENSG00000170381 | SEMA3E   | semaphorin 3E                                                       |
| 1,686 | ENSG00000092421 | SEMA6A   | semaphorin 6A                                                       |
| 1,332 | ENSG00000137872 | SEMA6D   | semaphorin 6D                                                       |
| 3,54  | ENSG00000197632 | SERPINB2 | serpin family B member 2                                            |
| 1,261 | ENSG00000170542 | SERPINB9 | serpin family B member 9                                            |
| 2,277 | ENSG00000149257 | SERPINH1 | serpin family H member 1                                            |
| 1,862 | ENSG00000197019 | SERTAD1  | SERTA domain containing 1                                           |
| 1,964 | ENSG00000179833 | SERTAD2  | SERTA domain containing 2                                           |
| 1,049 | ENSG00000167565 | SERTAD3  | SERTA domain containing 3                                           |
| 1,534 | ENSG00000130766 | SESN2    | sestrin 2                                                           |
| 1,746 | ENSG00000174938 | SEZ6L2   | seizure related 6 homolog like 2                                    |
| 1,177 | ENSG00000104897 | SF3A2    | splicing factor 3a subunit 2                                        |
| 1,13  | ENSG00000198089 | SFI1     | SFI1 centrin binding protein                                        |
| 2,669 | ENSG00000175793 | SFN      | stratifin                                                           |
| 1,422 | ENSG00000116560 | SFPQ     | splicing factor proline and glutamine rich                          |
| 2,381 | ENSG00000120057 | SFRP5    | secreted frizzled related protein 5                                 |
| 2,729 | ENSG00000164023 | SGMS2    | sphingomyelin synthase 2                                            |
| 2,379 | ENSG00000163082 | SGPP2    | sphingosine-1-phosphate phosphatase 2                               |
| 1,846 | ENSG00000125731 | SH2D3A   | SH2 domain containing 3A                                            |
| 1,07  | ENSG00000130147 | SH3BP4   | SH3 domain binding protein 4                                        |
| 1,13  | ENSG00000148341 | SH3GLB2  | SH3 domain containing GRB2 like, endophilin B2                      |
| 1,888 | ENSG00000154447 | SH3RF1   | SH3 domain containing ring finger 1                                 |
| 1,708 | ENSG00000156463 | SH3RF2   | SH3 domain containing ring finger 2                                 |
| 1,19  | ENSG00000035115 | SH3YL1   | SH3 and SYLF domain containing 1                                    |
| 1,152 | ENSG00000107338 | SHB      | SH2 domain containing adaptor protein B                             |
| 1,301 | ENSG00000180730 | SHISA2   | shisa family member 2                                               |
| 2,283 | ENSG00000237515 | SHISA9   | shisa family member 9                                               |
| 1,958 | ENSG00000138771 | SHROOM3  | shroom family member 3                                              |
| 1,295 | ENSG00000096717 | SIRT1    | sirtuin 1                                                           |
| 1,649 | ENSG00000100625 | SIX4     | SIX homeobox 4                                                      |
| 2,885 | ENSG00000064651 | SLC12A2  | solute carrier family 12 member 2                                   |
| 1,249 | ENSG00000124067 | SLC12A4  | solute carrier family 12 member 4                                   |
| 1,206 | ENSG00000113504 | SLC12A7  | solute carrier family 12 member 7                                   |
| 1,726 | ENSG00000118596 | SLC16A7  | solute carrier family 16 member 7                                   |
| 1,116 | ENSG00000146039 | SLC17A4  | solute carrier family 17 member 4                                   |
| 1,393 | ENSG00000117479 | SLC19A2  | solute carrier family 19 member 2                                   |
| 1,006 | ENSG00000144136 | SLC20A1  | solute carrier family 20 member 1                                   |
| 1,336 | ENSG00000153291 | SLC25A27 | solute carrier family 25 member 27                                  |
| 1,899 | ENSG00000197119 | SLC25A29 | solute carrier family 25 member 29                                  |
| 1,111 | ENSG00000130304 | SLC27A1  | solute carrier family 27 member 1                                   |
| 1,796 | ENSG00000197506 | SLC28A3  | solute carrier family 28 member 3                                   |
| 1,823 | ENSG00000174669 | SLC29A2  | solute carrier family 29 member 2                                   |
| 1,196 | ENSG00000117394 | SLC2A1   | solute carrier family 2 member 1                                    |
| 2,006 | ENSG00000157765 | SLC34A2  | solute carrier family 34 member 2                                   |
| 1,085 | ENSG00000100036 | SLC35E4  | solute carrier family 35 member E4                                  |
| 2,022 | ENSG00000110660 | SLC35F2  | solute carrier family 35 member F2                                  |
| 1,197 | ENSG00000183780 | SLC35F3  | solute carrier family 35 member F3                                  |
| 1,301 | ENSG00000169507 | SLC38A11 | solute carrier family 38 member 11                                  |
| 1,667 | ENSG00000168003 | SLC3A2   | solute carrier family 3 member 2                                    |
| 1,313 | ENSG00000133065 | SLC41A1  | solute carrier family 41 member 1                                   |
| 1,438 | ENSG00000143036 | SLC44A3  | solute carrier family 44 member 3                                   |

|       |                 |            |                                                                                                   |
|-------|-----------------|------------|---------------------------------------------------------------------------------------------------|
| 1,339 | ENSG00000114923 | SLC4A3     | solute carrier family 4 member 3                                                                  |
| 2,101 | ENSG00000080493 | SLC4A4     | solute carrier family 4 member 4                                                                  |
| 1,057 | ENSG00000033867 | SLC4A7     | solute carrier family 4 member 7                                                                  |
| 1,66  | ENSG00000100170 | SLC5A1     | solute carrier family 5 member 1                                                                  |
| 1,856 | ENSG00000117834 | SLC5A9     | solute carrier family 5 member 9                                                                  |
| 2,472 | ENSG00000174358 | SLC6A19    | solute carrier family 6 member 19                                                                 |
| 1,141 | ENSG00000131389 | SLC6A6     | solute carrier family 6 member 6                                                                  |
| 2,202 | ENSG00000139514 | SLC7A1     | solute carrier family 7 member 1                                                                  |
| 1,995 | ENSG00000103257 | SLC7A5     | solute carrier family 7 member 5                                                                  |
| 2,005 | ENSG00000260727 | SLC7A5P1   | solute carrier family 7 member 5 pseudogene 1                                                     |
| 2,578 | ENSG00000258186 | SLC7A5P2   | solute carrier family 7 member 5 pseudogene 2                                                     |
| 1,426 | ENSG00000090020 | SLC9A1     | solute carrier family 9 member A1                                                                 |
| 1,441 | ENSG00000066230 | SLC9A3     | solute carrier family 9 member A3                                                                 |
| 1,055 | ENSG00000180251 | SLC9A4     | solute carrier family 9 member A4                                                                 |
| 1,303 | ENSG00000176463 | SLCO3A1    | solute carrier organic anion transporter family member 3A1                                        |
| 1,719 | ENSG00000154760 | SLFN13     | schlafen family member 13                                                                         |
| 1,72  | ENSG00000166949 | SMAD3      | SMAD family member 3                                                                              |
| 1,888 | ENSG00000127616 | SMARCA4    | SWI/SNF related, matrix associated, actin dependent regulator of chromatin, subfamily a, member 4 |
| 3,569 | ENSG00000172062 | SMN1/SMN2  | survival of motor neuron 1, telomeric                                                             |
| 2,194 | ENSG00000088826 | SMOX       | spermine oxidase                                                                                  |
| 1,598 | ENSG00000103056 | SMPD3      | sphingomyelin phosphodiesterase 3                                                                 |
| 1,679 | ENSG00000130768 | SMPDL3B    | sphingomyelin phosphodiesterase acid like 3B                                                      |
| 1,634 | ENSG00000198742 | SMURF1     | SMAD specific E3 ubiquitin protein ligase 1                                                       |
| 1,412 | ENSG00000132639 | SNAP25     | synaptosome associated protein 25                                                                 |
| 1,062 | ENSG00000197989 | SNHG12     | small nucleolar RNA host gene 12                                                                  |
| 1,123 | ENSG00000234912 | SNHG20     | small nucleolar RNA host gene 20                                                                  |
| 1,569 | ENSG00000163877 | SNIP1      | Smad nuclear interacting protein 1                                                                |
| 5,44  | ENSG00000206811 | SNORA10    | small nucleolar RNA, H/ACA box 10                                                                 |
| 7,427 | ENSG00000206910 | SNORA29    | small nucleolar RNA, H/ACA box 29                                                                 |
| 3,876 | ENSG00000206612 | SNORA2A    | small nucleolar RNA, H/ACA box 2A                                                                 |
| 4,564 | ENSG00000207313 | SNORA2B    | small nucleolar RNA, H/ACA box 2B                                                                 |
| 5,76  | ENSG00000199785 | SNORA52    | small nucleolar RNA, H/ACA box 52                                                                 |
| 1,216 | ENSG00000212443 | SNORA53    | small nucleolar RNA, H/ACA box 53                                                                 |
| 3,867 | ENSG00000206693 | SNORA56    | small nucleolar RNA, H/ACA box 56                                                                 |
| 2,131 | ENSG00000199266 | SNORA60    | small nucleolar RNA, H/ACA box 60                                                                 |
| 2,57  | ENSG00000207088 | SNORA7B    | small nucleolar RNA, H/ACA box 7B                                                                 |
| 4,278 | ENSG00000206633 | SNORA80B   | small nucleolar RNA, H/ACA box 80B                                                                |
| 3,059 | ENSG00000239183 | SNORA84    | small nucleolar RNA, H/ACA box 84                                                                 |
| 3,521 | ENSG00000238917 | SNORD10    | small nucleolar RNA, C/D box 10                                                                   |
| 8,337 | ENSG00000199753 | SNORD104   | small nucleolar RNA, C/D box 104                                                                  |
| 2,796 | ENSG00000207014 | SNORD116-3 | small nucleolar RNA, C/D box 116-3                                                                |
| 5,891 | ENSG00000239043 | SNORD127   | small nucleolar RNA, C/D box 127                                                                  |
| 2,638 | ENSG00000207445 | SNORD15B   | small nucleolar RNA, C/D box 15B                                                                  |
| 5,671 | ENSG00000200530 | SNORD35B   | small nucleolar RNA, C/D box 35B                                                                  |
| 5,249 | ENSG00000202093 | SNORD58C   | small nucleolar RNA, C/D box 58C                                                                  |
| 6,486 | ENSG00000209482 | SNORD83A   | small nucleolar RNA, C/D box 83A                                                                  |
| 1,719 | ENSG00000212283 | SNORD89    | small nucleolar RNA, C/D box 89                                                                   |
| 2,627 | ENSG00000221539 | SNORD99    | small nucleolar RNA, C/D box 99                                                                   |
| 1,253 | ENSG00000144028 | SNRNP200   | small nuclear ribonucleoprotein U5 subunit 200                                                    |
| 1,233 | ENSG00000104852 | SNRNP70    | small nuclear ribonucleoprotein U1 subunit 70                                                     |
| 1,254 | ENSG00000159140 | SON        | SON DNA binding protein                                                                           |
| 1,12  | ENSG00000198142 | SOWAHC     | so sondowah ankyrin repeat domain family member C                                                 |
| 3,369 | ENSG00000124766 | SOX4       | SRY-box 4                                                                                         |
| 1,021 | ENSG00000110693 | SOX6       | SRY-box 6                                                                                         |
| 3,199 | ENSG00000125398 | SOX9       | SRY-box 9                                                                                         |
| 2,095 | ENSG00000104450 | SPAG1      | sperm associated antigen 1                                                                        |
| 1,15  | ENSG00000182957 | SPATA13    | spermatogenesis associated 13                                                                     |
| 1,136 | ENSG00000152582 | SPEF2      | sperm flagellar 2                                                                                 |
| 1,642 | ENSG00000065526 | SPEN       | spen family transcriptional repressor                                                             |
| 2,373 | ENSG00000176170 | SPHK1      | sphingosine kinase 1                                                                              |
| 2,324 | ENSG00000166145 | SPINT1     | serine peptidase inhibitor, Kunitz type 1                                                         |
| 1,453 | ENSG00000167642 | SPINT2     | serine peptidase inhibitor, Kunitz type 2                                                         |
| 1,646 | ENSG00000183018 | SPNS2      | sphingolipid transporter 2                                                                        |
| 1,615 | ENSG00000118785 | SPP1       | secreted phosphoprotein 1                                                                         |
| 1,409 | ENSG0000005206  | SPPL2B     | signal peptide peptidase like 2B                                                                  |
| 1,431 | ENSG00000171621 | SPSB1      | splA/ryanodine receptor domain and SOCS box containing 1                                          |
| 1,199 | ENSG00000197694 | SPTAN1     | spectrin alpha, non-erythrocytic 1                                                                |
| 1,215 | ENSG00000115306 | SPTBN1     | spectrin beta, non-erythrocytic 1                                                                 |
| 2,049 | ENSG00000104549 | SQLE       | squalene epoxidase                                                                                |
| 1,048 | ENSG00000197122 | SRC        | SRC proto-oncogene, non-receptor tyrosine kinase                                                  |
| 1,214 | ENSG00000198911 | SREBF2     | sterol regulatory element binding transcription factor 2                                          |
| 1,855 | ENSG00000112658 | SRF        | serum response factor                                                                             |
| 1,365 | ENSG00000196935 | SRGAP1     | SLIT-ROBO Rho GTPase activating protein 1                                                         |
| 1,099 | ENSG00000133226 | SRRM1      | serine and arginine repetitive matrix 1                                                           |
| 1,709 | ENSG00000167978 | SRRM2      | serine/arginine repetitive matrix 2                                                               |
| 1,043 | ENSG00000087087 | SRRT       | serate, RNA effector molecule                                                                     |
| 1,27  | ENSG00000154548 | SRSF12     | serine and arginine rich splicing factor 12                                                       |
| 1,08  | ENSG00000084112 | SSH1       | slingshot protein phosphatase 1                                                                   |
| 1,953 | ENSG00000149418 | ST14       | suppression of tumorigenicity 14                                                                  |
| 1,123 | ENSG00000166444 | ST5        | suppression of tumorigenicity 5                                                                   |
| 1,635 | ENSG00000168439 | STIP1      | stress induced phosphoprotein 1                                                                   |



|       |                 |             |                                                                        |
|-------|-----------------|-------------|------------------------------------------------------------------------|
| 1,496 | ENSG00000164543 | STK17A      | serine/threonine kinase 17a                                            |
| 2,118 | ENSG00000130413 | STK33       | serine/threonine kinase 33                                             |
| 1,092 | ENSG00000163482 | STK36       | serine/threonine kinase 36                                             |
| 1,097 | ENSG00000198648 | STK39       | serine/threonine kinase 39                                             |
| 1,378 | ENSG00000173320 | STOX2       | storkhead box 2                                                        |
| 1,465 | ENSG00000178750 | STX19       | syntaxin 19                                                            |
| 1,747 | ENSG00000166900 | STX3        | syntaxin 3                                                             |
| 1,734 | ENSG00000168952 | STXBP6      | syntaxin binding protein 6                                             |
| 1,5   | ENSG00000064607 | SUGP2       | SURP and G-patch domain containing 2                                   |
| 1,894 | ENSG00000198075 | SULT1C4     | sulfotransferase family 1C member 4                                    |
| 1,016 | ENSG00000196235 | SUPT5H      | SPT5 homolog, DSIF elongation factor subunit                           |
| 1,017 | ENSG00000100647 | SUSD6       | sushi domain containing 6                                              |
| 1,23  | ENSG00000197321 | SVIL        | supervillin                                                            |
| 1,023 | ENSG00000133789 | SWAP70      | SWAP switching B-cell complex subunit 70                               |
| 1,762 | ENSG00000205078 | SYCE1L      | synaptonemal complex central element protein 1 like                    |
| 1,11  | ENSG00000097096 | SYDE2       | synapse defective Rho GTPase homolog 2                                 |
| 1,02  | ENSG00000054654 | SYNE2       | spectrin repeat containing nuclear envelope protein 2                  |
| 1,251 | ENSG00000100321 | SYNGR1      | synaptogyrin 1                                                         |
| 1,42  | ENSG00000078269 | SYNJ2       | synaptojanin 2                                                         |
| 2,156 | ENSG00000254806 | SYS1-DBNDD2 | SYS1-DBNDD2 readthrough (NMD candidate)                                |
| 1,387 | ENSG00000019505 | SYT13       | synaptotagmin 13                                                       |
| 1,593 | ENSG00000149043 | SYT8        | synaptotagmin 8                                                        |
| 3,062 | ENSG00000184292 | TACSTD2     | tumor associated calcium signal transducer 2                           |
| 1,037 | ENSG00000103168 | TAF1C       | TATA-box binding protein associated factor, RNA polymerase I subunit C |
| 1,63  | ENSG00000166012 | TAF1D       | TATA-box binding protein associated factor, RNA polymerase I subunit D |
| 1,057 | ENSG00000106290 | TAF6        | TATA-box binding protein associated factor 6                           |
| 1,025 | ENSG00000213977 | TAX1BP3     | Tax1 binding protein 3                                                 |
| 1,598 | ENSG00000065491 | TBC1D22B    | TBC1 domain family member 22B                                          |
| 1,672 | ENSG00000204634 | TBC1D8      | TBC1 domain family member 8                                            |
| 1,032 | ENSG00000165929 | TC2N        | tandem C2 domains, nuclear                                             |
| 1,072 | ENSG00000113649 | TCERG1      | transcription elongation regulator 1                                   |
| 1,025 | ENSG00000071564 | TCF3        | transcription factor 3                                                 |
| 1,285 | ENSG00000148737 | TCF7L2      | transcription factor 7 like 2                                          |
| 1,406 | ENSG00000134827 | TCN1        | transcobalamin 1                                                       |
| 1,097 | ENSG00000187079 | TEAD1       | TEA domain transcription factor 1                                      |
| 1,669 | ENSG00000092850 | TEKT2       | tektin 2                                                               |
| 1,226 | ENSG00000261408 | TEN1-CDK3   | TEN1-CDK3 readthrough (NMD candidate)                                  |
| 2,407 | ENSG00000135269 | TES         | testin LIM domain protein                                              |
| 1,639 | ENSG00000088992 | TESC        | tescalcin                                                              |
| 1,439 | ENSG00000175664 | TEX26       | testis expressed 26                                                    |
| 1,817 | ENSG00000087510 | TFAP2C      | transcription factor AP-2 gamma                                        |
| 1,089 | ENSG00000112561 | TFEB        | transcription factor EB                                                |
| 1,965 | ENSG00000160182 | TFF1        | trefoil factor 1                                                       |
| 1,713 | ENSG00000160181 | TFF2        | trefoil factor 2                                                       |
| 2,834 | ENSG00000105825 | TFPI2       | tissue factor pathway inhibitor 2                                      |
| 1,373 | ENSG00000163235 | TGFA        | transforming growth factor alpha                                       |
| 3,105 | ENSG00000092969 | TGFB2       | transforming growth factor beta 2                                      |
| 1,524 | ENSG00000177426 | TGIF1       | TGFB induced factor homeobox 1                                         |
| 1,493 | ENSG00000118707 | TGIF2       | TGFB induced factor homeobox 2                                         |
| 1,118 | ENSG00000115970 | THADA       | THADA, armadillo repeat containing                                     |
| 1,931 | ENSG00000137801 | THBS1       | thrombospondin 1                                                       |
| 1,059 | ENSG00000054118 | THRAP3      | thyroid hormone receptor associated protein 3                          |
| 1,814 | ENSG00000187720 | THSD4       | thrombospondin type 1 domain containing 4                              |
| 1,627 | ENSG00000146426 | TIAM2       | T-cell lymphoma invasion and metastasis 2                              |
| 2,36  | ENSG00000127666 | TICAM1      | toll like receptor adaptor molecule 1                                  |
| 1,038 | ENSG00000142910 | TINAGL1     | tubulointerstitial nephritis antigen like 1                            |
| 2,046 | ENSG00000163659 | TIPARP      | TCDD inducible poly(ADP-ribose) polymerase                             |
| 1,521 | ENSG00000104067 | TJP1        | tight junction protein 1                                               |
| 1,873 | ENSG00000119139 | TJP2        | tight junction protein 2                                               |
| 1,165 | ENSG00000196781 | TLE1        | transducin like enhancer of split 1                                    |
| 1,336 | ENSG00000065717 | TLE2        | transducin like enhancer of split 2                                    |
| 1,662 | ENSG00000106829 | TLE4        | transducin like enhancer of split 4                                    |
| 1,095 | ENSG00000187554 | TLR5        | toll like receptor 5                                                   |
| 2,519 | ENSG00000169908 | TM4SF1      | transmembrane 4 L six family member 1                                  |
| 1,498 | ENSG00000103534 | TMCS        | transmembrane channel like 5                                           |
| 1,368 | ENSG00000133069 | TMCC2       | transmembrane and coiled-coil domain family 2                          |
| 1,801 | ENSG00000006118 | TMEM132A    | transmembrane protein 132A                                             |
| 2,327 | ENSG00000181264 | TMEM136     | transmembrane protein 136                                              |
| 2,375 | ENSG00000249992 | TMEM158     | transmembrane protein 158 (gene/pseudogene)                            |
| 1,135 | ENSG00000152128 | TMEM163     | transmembrane protein 163                                              |
| 2,239 | ENSG00000157111 | TMEM171     | transmembrane protein 171                                              |
| 1,458 | ENSG00000164855 | TMEM184A    | transmembrane protein 184A                                             |
| 1,245 | ENSG00000182796 | TMEM198B    | transmembrane protein 198B (pseudogene)                                |
| 1,892 | ENSG00000186329 | TMEM212     | transmembrane protein 212                                              |
| 1,135 | ENSG00000172738 | TMEM217     | transmembrane protein 217                                              |
| 1,195 | ENSG00000182107 | TMEM30B     | transmembrane protein 30B                                              |
| 1,573 | ENSG00000171729 | TMEM51      | transmembrane protein 51                                               |
| 1,226 | ENSG00000121900 | TMEM54      | transmembrane protein 54                                               |
| 1,481 | ENSG00000196187 | TMEM63A     | transmembrane protein 63A                                              |
| 1,009 | ENSG00000137103 | TMEM8B      | transmembrane protein 8B                                               |
| 1,567 | ENSG00000137747 | TMPRSS13    | transmembrane protease, serine 13                                      |

|       |                 |                 |                                                                  |
|-------|-----------------|-----------------|------------------------------------------------------------------|
| 1,337 | ENSG00000184012 | TMPRSS2         | transmembrane protease, serine 2                                 |
| 2,294 | ENSG00000160183 | TMPRSS3         | transmembrane protease, serine 3                                 |
| 2,362 | ENSG00000041982 | TNC             | tenascin C                                                       |
| 2,899 | ENSG00000185215 | TNFAIP2         | TNF alpha induced protein 2                                      |
| 3,713 | ENSG00000118503 | TNFAIP3         | TNF alpha induced protein 3                                      |
| 1,621 | ENSG00000104689 | TNFRSF10A       | TNF receptor superfamily member 10a                              |
| 1,999 | ENSG00000120889 | TNFRSF10B       | TNF receptor superfamily member 10b                              |
| 2,265 | ENSG00000173530 | TNFRSF10D       | TNF receptor superfamily member 10d                              |
| 1,97  | ENSG00000006327 | TNFRSF12A       | TNF receptor superfamily member 12A                              |
| 2,551 | ENSG00000127863 | TNFRSF19        | TNF receptor superfamily member 19                               |
| 2,088 | ENSG00000146072 | TNFRSF21        | TNF receptor superfamily member 21                               |
| 1,221 | ENSG00000243509 | TNFRSF6B        | TNF receptor superfamily member 6b                               |
| 1,759 | ENSG00000248871 | TNFSF12-TNFSF13 | TNFSF12-TNFSF13 readthrough                                      |
| 3,102 | ENSG00000125657 | TNFSF9          | TNF superfamily member 9                                         |
| 1,452 | ENSG00000149115 | TNKS1BP1        | tankyrase 1 binding protein 1                                    |
| 1,417 | ENSG00000183864 | TOB2            | transducer of ERBB2, 2                                           |
| 1,144 | ENSG00000025772 | TOMM34          | translocase of outer mitochondrial membrane 34                   |
| 1,016 | ENSG00000198900 | TOP1            | topoisomerase (DNA) I                                            |
| 1,158 | ENSG00000103460 | TOX3            | TOX high mobility group box family member 3                      |
| 1,625 | ENSG00000067369 | TP53BP1         | tumor protein p53 binding protein 1                              |
| 3,191 | ENSG00000143514 | TP53BP2         | tumor protein p53 binding protein 2                              |
| 1,346 | ENSG00000115129 | TP53I3          | tumor protein p53 inducible protein 3                            |
| 2,516 | ENSG00000146242 | TPBG            | trophoblast glycoprotein                                         |
| 1,649 | ENSG00000171368 | TPPP            | tubulin polymerization promoting protein                         |
| 2,594 | ENSG00000159713 | TPPP3           | tubulin polymerization promoting protein family member 3         |
| 2,265 | ENSG00000056558 | TRAF1           | TNF receptor associated factor 1                                 |
| 1,359 | ENSG00000182606 | TRAK1           | trafficking kinesin protein 1                                    |
| 3,412 | ENSG00000173334 | TRIB1           | tribbles pseudokinase 1                                          |
| 1,012 | ENSG00000130726 | TRIM28          | tripartite motif containing 28                                   |
| 2,339 | ENSG00000137699 | TRIM29          | tripartite motif containing 29                                   |
| 1,345 | ENSG00000134253 | TRIM45          | tripartite motif containing 45                                   |
| 1,857 | ENSG00000132481 | TRIM47          | tripartite motif containing 47                                   |
| 1,05  | ENSG00000038382 | TRIO            | trio Rho guanine nucleotide exchange factor                      |
| 1,498 | ENSG00000125733 | TRIP10          | thyroid hormone receptor interactor 10                           |
| 1,495 | ENSG00000253368 | TRNP1           | TMF1-regulated nuclear protein 1                                 |
| 1,026 | ENSG00000130529 | TRPM4           | transient receptor potential cation channel subfamily M member 4 |
| 1,099 | ENSG00000165699 | TSC1            | tuberous sclerosis 1                                             |
| 1,086 | ENSG00000103197 | TSC2            | tuberous sclerosis 2                                             |
| 2,906 | ENSG00000196428 | TSC2D2          | TSC2 domain family member 2                                      |
| 1,607 | ENSG00000099282 | TSPAN15         | tetraspanin 15                                                   |
| 1,611 | ENSG00000005379 | TSPAP1          | TSP0 associated protein 1                                        |
| 1,09  | ENSG00000187189 | TSPYL4          | TSPY like 4                                                      |
| 1,738 | ENSG00000214021 | TTL3            | tubulin tyrosine ligase like 3                                   |
| 1,381 | ENSG00000135912 | TTL4            | tubulin tyrosine ligase like 4                                   |
| 1,329 | ENSG00000167553 | TUBA1C          | tubulin alpha 1c                                                 |
| 1,129 | ENSG00000137267 | TUBB2A          | tubulin beta 2A class IIa                                        |
| 1,396 | ENSG00000137285 | TUBB2B          | tubulin beta 2B class IIb                                        |
| 1,161 | ENSG00000104833 | TUBB4A          | tubulin beta 4A class IVa                                        |
| 1,367 | ENSG00000188229 | TUBB4B          | tubulin beta 4B class IVb                                        |
| 1,311 | ENSG00000128159 | TUBGCP6         | tubulin gamma complex associated protein 6                       |
| 2,317 | ENSG00000143367 | TUFT1           | tuftelin 1                                                       |
| 1,082 | ENSG00000253352 | TUG1            | taurine up-regulated 1 (non-protein coding)                      |
| 1,023 | ENSG00000137073 | UBAP2           | ubiquitin associated protein 2                                   |
| 1,005 | ENSG00000143569 | UBAP2L          | ubiquitin associated protein 2 like                              |
| 2,519 | ENSG00000150991 | UBC             | ubiquitin C                                                      |
| 1,187 | ENSG00000186591 | UBE2H           | ubiquitin conjugating enzyme E2 H                                |
| 1,809 | ENSG00000108106 | UBE2S           | ubiquitin conjugating enzyme E2 S                                |
| 1,01  | ENSG00000177414 | UBE2U           | ubiquitin conjugating enzyme E2 U (putative)                     |
| 1,292 | ENSG00000158062 | UBXN11          | UBX domain protein 11                                            |
| 2,131 | ENSG00000214049 | UCA1            | urothelial cancer associated 1 (non-protein coding)              |
| 1,319 | ENSG00000148154 | UGCG            | UDP-glucose ceramide glucosyltransferase                         |
| 2,083 | ENSG00000174607 | UGT8            | UDP glycosyltransferase 8                                        |
| 1,013 | ENSG00000124602 | UNC5CL          | unc-5 family C-terminal like                                     |
| 1,339 | ENSG00000005007 | UPF1            | UPF1, RNA helicase and ATPase                                    |
| 1,016 | ENSG00000114638 | UPK1B           | uropod protein 1B                                                |
| 1,055 | ENSG00000106608 | URGCP           | upregulator of cell proliferation                                |
| 1,988 | ENSG00000006611 | USH1C           | USH1 protein network component harmonin                          |
| 1,242 | ENSG00000102226 | USP11           | ubiquitin specific peptidase 11                                  |
| 1,815 | ENSG00000154914 | USP43           | ubiquitin specific peptidase 43                                  |
| 1,194 | ENSG00000132952 | USPL1           | ubiquitin specific peptidase like 1                              |
| 1,08  | ENSG00000168140 | VASN            | vasorin                                                          |
| 1,143 | ENSG00000171724 | VAT1L           | vesicle amine transport 1 like                                   |
| 1,21  | ENSG00000038427 | VCAN            | versican                                                         |
| 2,057 | ENSG00000112715 | VEGFA           | vascular endothelial growth factor A                             |
| 1,574 | ENSG00000197415 | VEPH1           | ventricular zone expressed PH domain containing 1                |
| 1,087 | ENSG00000136451 | VEZF1           | vascular endothelial zinc finger 1                               |
| 1,221 | ENSG00000102243 | VGLL1           | vestigial like family member 1                                   |
| 1,346 | ENSG00000206538 | VGLL3           | vestigial like family member 3                                   |
| 2,071 | ENSG00000127831 | VIL1            | villin 1                                                         |
| 1,029 | ENSG00000136059 | VILL            | villin like                                                      |
| 2,414 | ENSG00000139722 | VPS37B          | VPS37B, ESCRT-I subunit                                          |

|       |                 |                 |                                                        |
|-------|-----------------|-----------------|--------------------------------------------------------|
| 1,208 | ENSG0000019102  | VSIG2           | V-set and immunoglobulin domain containing 2           |
| 1,366 | ENSG00000132821 | VSTM2L          | V-set and transmembrane domain containing 2 like       |
| 1,831 | ENSG00000134258 | VTCN1           | V-set domain containing T-cell activation inhibitor 1  |
| 2,958 | ENSG00000199990 | VTRNA1-1        | vault RNA 1-1                                          |
| 7,969 | ENSG00000202515 | VTRNA1-3        | vault RNA 1-3                                          |
| 1,034 | ENSG00000062650 | WAPL            | WAPL cohesin release factor                            |
| 2,239 | ENSG00000227232 | WASH7P          | WAS protein family homolog 7 pseudogene                |
| 1,191 | ENSG00000099290 | WASHC2A/WASHC2C | WASH complex subunit 2C                                |
| 1,07  | ENSG00000157796 | WDR19           | WD repeat domain 19                                    |
| 1,537 | ENSG00000184465 | WDR27           | WD repeat domain 27                                    |
| 1,206 | ENSG00000085433 | WDR47           | WD repeat domain 47                                    |
| 1,88  | ENSG00000178252 | WDR6            | WD repeat domain 6                                     |
| 1,222 | ENSG00000152763 | WDR78           | WD repeat domain 78                                    |
| 1,634 | ENSG00000161996 | WDR90           | WD repeat domain 90                                    |
| 1,194 | ENSG00000105875 | WDR91           | WD repeat domain 91                                    |
| 3,19  | ENSG00000166483 | WEE1            | WEE1 G2 checkpoint kinase                              |
| 2,312 | ENSG00000101443 | WFDC2           | WAP four-disulfide core domain 2                       |
| 1,315 | ENSG00000095397 | WHRN            | whirlin                                                |
| 2,225 | ENSG00000165238 | WNK2            | WNK lysine deficient protein kinase 2                  |
| 1,932 | ENSG00000135925 | WNT10A          | Wnt family member 10A                                  |
| 1,167 | ENSG00000188064 | WNT7B           | Wnt family member 7B                                   |
| 1,518 | ENSG00000109046 | WSB1            | WD repeat and SOCS box containing 1                    |
| 1,652 | ENSG00000113645 | WWC1            | WW and C2 domain containing 1                          |
| 1,249 | ENSG00000198373 | WWP2            | WW domain containing E3 ubiquitin protein ligase 2     |
| 1,445 | ENSG00000018408 | WWTR1           | WW domain containing transcription regulator 1         |
| 1,967 | ENSG00000180667 | YOD1            | YOD1 deubiquitinase                                    |
| 1,355 | ENSG00000175155 | YPEL2           | yippee like 2                                          |
| 1,658 | ENSG00000205189 | ZBTB10          | zinc finger and BTB domain containing 10               |
| 1,518 | ENSG00000109906 | ZBTB16          | zinc finger and BTB domain containing 16               |
| 1,809 | ENSG00000181472 | ZBTB2           | zinc finger and BTB domain containing 2                |
| 2,039 | ENSG00000181722 | ZBTB20          | zinc finger and BTB domain containing 20               |
| 1,355 | ENSG00000177125 | ZBTB34          | zinc finger and BTB domain containing 34               |
| 1,114 | ENSG00000184677 | ZBTB40          | zinc finger and BTB domain containing 40               |
| 2,362 | ENSG00000169155 | ZBTB43          | zinc finger and BTB domain containing 43               |
| 1,268 | ENSG00000178951 | ZBTB7A          | zinc finger and BTB domain containing 7A               |
| 4,604 | ENSG00000163874 | ZC3H12A         | zinc finger CCCH-type containing 12A                   |
| 1,272 | ENSG00000105939 | ZC3HAV1         | zinc finger CCCH-type containing, antiviral 1          |
| 1,195 | ENSG00000033030 | ZCCHC8          | zinc finger CCHC-type containing 8                     |
| 1,105 | ENSG00000159714 | ZDHHC1          | zinc finger DHHC-type containing 1                     |
| 2,023 | ENSG00000178381 | ZFAND2A         | zinc finger AN1-type containing 2A                     |
| 1,408 | ENSG00000133858 | ZFC3H1          | zinc finger C3H1-type containing                       |
| 2,784 | ENSG00000128016 | ZFP36           | ZFP36 ring finger protein                              |
| 1,277 | ENSG00000185650 | ZFP36L1         | ZFP36 ring finger protein like 1                       |
| 2,543 | ENSG00000162078 | ZG16B           | zymogen granule protein 16B                            |
| 1,056 | ENSG00000178764 | ZHX2            | zinc fingers and homeoboxes 2                          |
| 1,475 | ENSG00000108175 | ZMIZ1           | zinc finger MIZ-type containing 1                      |
| 1,607 | ENSG00000122515 | ZMIZ2           | zinc finger MIZ-type containing 2                      |
| 1,151 | ENSG00000115568 | ZNF142          | zinc finger protein 142                                |
| 3,271 | ENSG00000197279 | ZNF165          | zinc finger protein 165                                |
| 1,758 | ENSG00000171940 | ZNF217          | zinc finger protein 217                                |
| 1,361 | ENSG00000165804 | ZNF219          | zinc finger protein 219                                |
| 1,079 | ENSG00000159917 | ZNF235          | zinc finger protein 235                                |
| 1,153 | ENSG00000130856 | ZNF236          | zinc finger protein 236                                |
| 1,307 | ENSG00000152454 | ZNF256          | zinc finger protein 256                                |
| 1,275 | ENSG00000185947 | ZNF267          | zinc finger protein 267                                |
| 1,307 | ENSG00000162702 | ZNF281          | zinc finger protein 281                                |
| 2,157 | ENSG00000170684 | ZNF296          | zinc finger protein 296                                |
| 1,023 | ENSG00000130803 | ZNF317          | zinc finger protein 317                                |
| 1,279 | ENSG00000198026 | ZNF335          | zinc finger protein 335                                |
| 1,239 | ENSG00000197647 | ZNF433          | zinc finger protein 433                                |
| 1,029 | ENSG00000083838 | ZNF446          | zinc finger protein 446                                |
| 1,679 | ENSG00000105732 | ZNF574          | zinc finger protein 574                                |
| 1,251 | ENSG00000166716 | ZNF592          | zinc finger protein 592                                |
| 1,352 | ENSG00000168916 | ZNF608          | zinc finger protein 608                                |
| 1,593 | ENSG00000171163 | ZNF692          | zinc finger protein 692                                |
| 1,531 | ENSG00000147180 | ZNF711          | zinc finger protein 711                                |
| 1,039 | ENSG00000221874 | ZNF816-ZNF321P  | ZNF816-ZNF321P readthrough                             |
| 1,375 | ENSG00000257446 | ZNF878          | zinc finger protein 878                                |
| 1,293 | ENSG00000170044 | ZPLD1           | zona pellucida like domain containing 1                |
| 1,263 | ENSG00000229956 | ZRANB2-AS2      | ZRANB2 antisense RNA 2 (head to head)                  |
| 1,46  | ENSG00000219891 | ZSCAN12P1       | zinc finger and SCAN domain containing 12 pseudogene 1 |
| 1,044 | ENSG00000121413 | ZSCAN18         | zinc finger and SCAN domain containing 18              |
| 2,171 | ENSG00000132003 | ZSWIM4          | zinc finger SWIM-type containing 4                     |
| 1,534 | ENSG00000130449 | ZSWIM6          | zinc finger SWIM-type containing 6                     |
| 1,487 | ENSG00000198455 | ZXDB            | zinc finger, X-linked, duplicated B                    |
| 1,092 | ENSG00000159840 | ZYX             | zyxin                                                  |
